# Supplementary material for: Systematic modifications of substitution patterns for property tuning of photoswitchable asymmetric azobenzenes
Source: Royal Society of Chemistry journal article supplement (doi:10.1039/d2ob00214k), 2022-01-01
Supplement: d2ob00214k1.pdf [file d2ob00214k1.pdf]

**Systematic Modifications of Substitution Patterns for Property  
Tuning of Photoswitchable Asymmetric Azobenzenes<sup>†</sup>**

Florian Küllmer, Lucas Gregor and Hans-Dieter Arndt

**- Supplemental Information -**

## **TABLE OF CONTENTS**

|                                                      |             |
|------------------------------------------------------|-------------|
| <b>Supplementary Figures .....</b>                   | <b>S3</b>   |
| <b>Materials and Methods .....</b>                   | <b>S5</b>   |
| Synthetic protocols.....                             | S5          |
| Chromatography.....                                  | S5          |
| NMR spectra .....                                    | S6          |
| UV-Vis analysis .....                                | S6          |
| Infrared (IR) spectra.....                           | S8          |
| Melting points .....                                 | S8          |
| Low- and high-resolution ESI mass spectra.....       | S8          |
| <b>Chemical Synthesis and Characterisation .....</b> | <b>S9</b>   |
| Standard Procedures.....                             | S9          |
| Syntheses.....                                       | S12         |
| <b>Supplementary Note 1.....</b>                     | <b>S63</b>  |
| <b>Supplementary Note 2.....</b>                     | <b>S74</b>  |
| <b>Supplemental References.....</b>                  | <b>S160</b> |

## Supplementary Figures

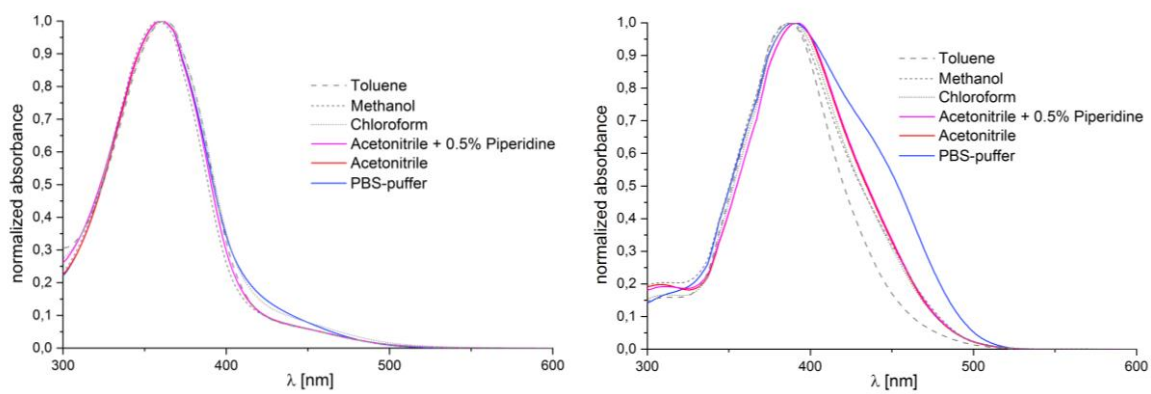

**Figure S1.** UV-Vis spectra of **9b** (left) and **1c** (right) in different solvents.

**Table S1.** PSS of azobenzenes in PBS-buffer.<sup>[a]</sup>

| Entry      | PSS [%] <sup>[b]</sup> |        |        |        |        |        |        |        | $\lambda_{\text{max}}$<br>[nm] |
|------------|------------------------|--------|--------|--------|--------|--------|--------|--------|--------------------------------|
|            | 370 nm                 | 380 nm | 390 nm | 400 nm | 420 nm | 450 nm | 470 nm | 520 nm |                                |
| <b>1e</b>  | 96                     | 94     | 88     | 67     | 44     | 32     | 26     | 15     | 360                            |
| <b>1f</b>  | 97                     | 94     | -      | 60     | 41     | 29     | 22     | 10     | 356                            |
| <b>1g</b>  | 93                     | 87     | 79     | 46     | 32     | 28     | 26     | 21     | 352                            |
| <b>4a</b>  | 86                     | 90     | 90     | 82     | 66     | 49     | 38     | 24     | 388                            |
| <b>4b</b>  | 85                     | 90     | 92     | 90     | 80     | 66     | 55     | 32     | 400                            |
| <b>4c</b>  | 77                     | 78     | 75     | 64     | 54     | 51     | 50     | 45     | 388                            |
| <b>4d</b>  | 83                     | 88     | 90     | 88     | 81     | 70     | 59     | 30     | 407                            |
| <b>5a</b>  | 94                     | 95     | 93     | 84     | 69     | 51     | 36     | 12     | 380                            |
| <b>6</b>   | 92                     | 94     | 93     | 86     | 72     | 57     | 44     | 20     | 384                            |
| <b>7a</b>  | 93                     | 92     | 88     | 72     | 50     | 40     | 37     | 33     | 368                            |
| <b>9a</b>  | 94                     | 95     | -      | 81     | 61     | 42     | 29     | 13     | 368                            |
| <b>9b</b>  | 96                     | 94     | 90     | 71     | 49     | 36     | 30     | 18     | 360                            |
| <b>9c</b>  | 93                     | 91     | -      | 69     | 46     | 34     | 27     | 14     | 361                            |
| <b>9d</b>  | 95                     | 94     | -      | 72     | 47     | 34     | 27     | 14     | 360                            |
| <b>9e</b>  | 94                     | 92     | -      | 70     | 49     | 36     | 28     | 16     | 361                            |
| <b>10a</b> | 95                     | 96     | -      | 79     | 55     | 37     | 28     | 13     | 369                            |
| <b>10b</b> | 95                     | 94     | 89     | 71     | 48     | 34     | 27     | 15     | 363                            |
| <b>10c</b> | 81                     | 86     | 83     | 71     | 54     | 41     | 32     | 16     | 368                            |
| <b>10d</b> | 90                     | 91     | -      | 80     | 60     | 41     | 28     | 7      | 373                            |
| <b>11a</b> | 90                     | 93     | 93     | 87     | 75     | 61     | 45     | 15     | 390                            |
| <b>11b</b> | 91                     | 93     | 92     | 83     | 70     | 56     | 43     | 17     | 384                            |
| <b>11c</b> | 81                     | 80     | 77     | 67     | 55     | 49     | 48     | 40     | 360                            |
| <b>12</b>  | 96                     | 94     | 88     | 67     | 44     | 32     | 26     | 15     | 370                            |
| <b>26e</b> | 96                     | 95     | -      | 76     | 57     | 42     | 33     | 17     | 366                            |
| <b>26f</b> | 99                     | 97     | -      | 74     | 51     | 35     | 25     | 10     | 361                            |
| <b>26a</b> | 93                     | 93     | 91     | 79     | 61     | 40     | 26     | 8      | 370                            |
| <b>26b</b> | 94                     | 95     | 91     | 75     | 55     | 40     | 30     | 15     | 365                            |
| <b>26c</b> | 96                     | 96     | -      | 81     | 62     | 46     | 35     | 18     | 368                            |
| <b>29a</b> | 96                     | 96     | 94     | 86     | 71     | 53     | 39     | 14     | 380                            |
| <b>29e</b> | 89                     | 89     | 85     | 74     | 57     | 42     | 35     | 20     | 368                            |
| <b>34</b>  | 93                     | 93     | 91     | 80     | 62     | 46     | 35     | 16     | 373                            |
| <b>37a</b> | 91                     | 94     | 94     | 84     | 67     | 50     | 36     | 15     | 381                            |
| <b>37b</b> | 92                     | 93     | -      | 74     | 54     | 39     | 31     | 18     | 373                            |
| <b>37c</b> | 94                     | 94     | 91     | 74     | 48     | 32     | 25     | 16     | 368                            |
| <b>39</b>  | 82                     | 82     | 78     | 64     | 47     | 39     | 38     | 34     | 360                            |
| <b>47a</b> | 82                     | 88     | 89     | 83     | 68     | 52     | 41     | 24     | 392                            |
| <b>47b</b> | 78                     | 85     | 88     | 87     | 79     | 67     | 58     | 32     | 406                            |
| <b>47c</b> | 68                     | 76     | 74     | 66     | 57     | 53     | 53     | 45     | 394                            |
| <b>47d</b> | 75                     | 83     | 87     | 88     | 83     | 73     | 64     | 32     | 415                            |

[a] measured at 37 °C in PBS-buffer/ CH<sub>3</sub>CN (2:1) mixture. [b] amount of Z-isomer after irradiation at referred wavelength.

## Materials and Methods

### Synthetic protocols

The Boc-protected anilines **23** and **32**, mono protected catechol **24a** and phenol **27** were synthesized using standard procedures.<sup>1</sup> TBS-protected catechol **43a** was synthesised following literature procedure of Stein.<sup>2</sup> Naphtols **45c** and **45d** were synthesized according to literature procedures of Deyris<sup>3</sup> and Ramkumar.<sup>4</sup> Oxazine **21** was synthesised according to literature procedures of Mofford<sup>5</sup> and Doherty.<sup>6</sup> All other reagents and solvents were purchased from vendors (Acros, Alfa Aesar, ChemPur, Fluka, Fluorochem, Sigma-Aldrich, Strem Chemicals, TCI Europe N.V., VWR) and were used without further purification unless noted otherwise.

All solvents, when not purchased in suitable purity or dryness, were distilled using standard methods,<sup>7</sup> or suitable dehydration procedures: tetrahydrofuran (THF) was distilled under a N<sub>2</sub> atmosphere from Na/benzophenone before use; dichloromethane (CH<sub>2</sub>Cl<sub>2</sub>) was distilled under a N<sub>2</sub> atmosphere from CaH<sub>2</sub> before use. Other anhydrous solvents such as toluene and dimethylformamide (DMF) were obtained in HPLC quality and passed through a solvent purification system equipped with Al<sub>2</sub>O<sub>3</sub> (toluene) or molecular sieves 3 Å (DMF, Pure Solv, Innovative Technology, Inc., USA) by applying N<sub>2</sub> overpressure immediately before use. Commercial-grade distilled (*i*Pr)<sub>2</sub>NEt (99%) was used without additional distillation. The petroleum ether used had a boiling range of 40-60 °C. Phosphate buffer (pH = 7) was prepared by dissolving Na<sub>3</sub>PO<sub>4</sub>×12 H<sub>2</sub>O (54.8 g, 0.14 mol) und NaH<sub>2</sub>PO<sub>4</sub> (42.7 g, 0.36 mol) in water (1.0 L). Deionized water was used for all experiments.

### Chromatography

Reaction progress was monitored by TLC on precoated, Merck Silica gel 60 F254 alumina-backed plates. TLC chromatograms were first visualized by UV irradiation at 254 nm or 320 nm, followed by staining with aqueous KMnO<sub>4</sub> (2 g KMnO<sub>4</sub>, 13.2 g K<sub>2</sub>CO<sub>3</sub>, 165 mg NaOH, 200 mL H<sub>2</sub>O) or ceric ammonium molybdate solution (0.5 g of Ce(NH<sub>4</sub>)<sub>4</sub>(SO<sub>4</sub>)<sub>4</sub> × 2H<sub>2</sub>O, 12 g (NH<sub>4</sub>)<sub>6</sub>Mo<sub>7</sub>O<sub>24</sub> × 4H<sub>2</sub>O, 15 mL H<sub>2</sub>SO<sub>4</sub>, 235 mL H<sub>2</sub>O) followed by gentle heating on air for detection. Primary and secondary amines were detected with ninhydrin (6% in EtOH).

Flash chromatography was performed using silica gel (SiO<sub>2</sub>, particle size 40 – 63 μm) purchased from Macherey & Nagel, Düren (Germany) under a pressure of 0.3 – 0.5 bar.

Preparative HPLC purification was performed on a Varian system consisting of a ProStar 215 (pump), ProStar 340 (UV/VIS-detector) and a ProStar 701 (collector). A VP250/21 Nucleodur C18 Gravity 5μm column was used. A gradient of Water and Acetonitrile was applied as mobile phase.

### **NMR spectra**

<sup>1</sup>H- and <sup>13</sup>C-NMR spectra were recorded on Bruker Avance I 250 (250 MHz (<sup>1</sup>H) and 63 Hz (<sup>13</sup>C)), Bruker Fourier 300 (300 MHz (<sup>1</sup>H) and 75 Hz (<sup>13</sup>C)), Bruker Avance III 400 (400 MHz (<sup>1</sup>H) and 100 MHz (<sup>13</sup>C)), Bruker Avance III HD 500 (500 MHz (<sup>1</sup>H) and 100 MHz (<sup>13</sup>C)), and Bruker AC 600 (600 MHz (<sup>1</sup>H) and 150 MHz (<sup>13</sup>C)) spectrometers. Chemical shifts are expressed in parts per million (ppm). The spectra were calibrated to residual solvent signals of CHCl<sub>3</sub> (7.26 ppm (<sup>1</sup>H) and 77.0 ppm (<sup>13</sup>C)), DMSO-*d*<sub>5</sub> (2.50 ppm (<sup>1</sup>H) and 39.43 ppm (<sup>13</sup>C)), CHD<sub>2</sub>OD (3.31 ppm (<sup>1</sup>H) and 49.0 ppm (<sup>13</sup>C)), DHO (4.79 ppm (<sup>1</sup>H)), respectively. Coupling constants are given in Hertz (Hz) and the following notations indicate the multiplicity of the signals: s (singlet), d (doublet), t (triplet), q (quartet), m (multiplet), br (broad signal). Owing to the *E/Z* equilibrium of some compounds containing an azobenzene functionality, more signals were observed in the <sup>1</sup>H and <sup>13</sup>C spectra than would be expected for a single isomer. Signals for the major *E*- isomer are reported. Signal identity and peak assignments were verified by 2D-NMR experiments (COSY, TOCSY, HSQC and HMBC) whenever necessary. NMR spectra are displayed in Supplementary Note 2.

### **UV–Vis analysis**

UV-Vis spectra were recorded using a JASCO V-730 UV–Visible Spectrophotometer with Helma SUPRASIL precision cuvettes (5 mm light path). All compounds were dissolved as 10-30 mM stock solutions in DMF and diluted to the given concentrations using cosolvents and buffers as indicated. Switching was achieved by irradiating the cuvettes at 0.2 to 0.5 cm within the spectrometer for 10 to 30 s. For irradiation high power single chip SMD LEDs from Roithner Lasertechnik GmbH with a current of 350 mA were used. The LEDs show

their main intensity at the specified wavelength with a width of  $\pm 5$  nm. UV-spectra of all compounds are reproduced in Supplementary Note 1.

**Table S2.** LEDs from Roithner Lasertechnik GmbH used in this paper

| Entry | $\lambda$ [nm] | LED code   |
|-------|----------------|------------|
| 1     | 370            | VL370-5050 |
| 2     | 380            | VL380-5050 |
| 3     | 390            | VL390-5050 |
| 4     | 400            | VL400-5050 |
| 5     | 420            | SMB1N-420H |
| 6     | 450            | SMB1N-D450 |
| 7     | 470            | SMD1N-D470 |
| 8     | 520            | SMD1N-D520 |

Relaxation rates were evaluated assigning first order kinetics of the *E-Z*-isomerization reaction. Samples were measured under dark (*E*) conditions at their absorption maximum, irradiated (*Z*) to reach photostationary equilibrium, followed by measuring the changing absorbance over time according to first order kinetics. Data were evaluated by fitting the rate equation  $[A] = [A]_0 e^{(-kt)}$  using the Excel program. Half-lives were obtained by:  $t_{1/2} = \ln(2)/k$ .

To determine the ratio  $\alpha$  of the two isomers in the PSS *Fischer's* method was applied.<sup>8</sup> The absorbance (*A*) of the pure *E*- isomer (dark) and mixed spectra of *E*- and *Z*- isomer after irradiation with two different wavelengths ( $\lambda_1$  and  $\lambda_2$ ) are required. According to *Fischer's* formula:

$$\alpha_{\lambda_1} = \frac{\frac{\Delta A_{\lambda_1}}{A_{\lambda_1, \lambda_1}} - \frac{\Delta A_{\lambda_2}}{A_{\lambda_2, \lambda_2}}}{1 + \frac{\Delta A_{\lambda_1}}{A_{\lambda_1, \lambda_1}} - n \left(1 + \frac{\Delta A_{\lambda_2}}{A_{\lambda_2, \lambda_2}}\right)} \quad \text{with} \quad n = \frac{A_{\text{dark}, \lambda_1} - A_{\lambda_1, \lambda_1}}{A_{\text{dark}, \lambda_1} - A_{\lambda_2, \lambda_1}}$$

the PSS (PSS =  $\alpha * 100$ ) at the irradiated wavelengths can be determined. In this work, irradiation was carried out at seven to eight different wavelengths. To determine the PSS, the wavelength that provided the largest percentage of (*Z*) isomers was chosen as the basis and the ratio  $\alpha$  was determined with the other wavelengths. For this wavelength, the PSS was determined from the mean value of all received  $\alpha$ . The other wavelengths were specified relative to it. The determined  $\alpha$  values generally had a standard deviation of  $\pm 0.01 - 0.03$ , for

some aniline derivatives the deviation was up to  $\pm 0.05$ . Based on the obtained ratio  $\alpha$ , the absorbance of the pure (Z) isomer can be calculated using the formula:

$$A_{Z\text{-Isomer},\lambda} = A_{dark,\lambda} + \frac{A_{\lambda_1,\lambda} - A_{dark,\lambda}}{\alpha_{\lambda_1}}$$

### **Infrared (IR) spectra**

Fourier transform infrared spectroscopy (FT-IR) spectra were obtained by using an IR-Affinity-1 from Shimadzu (ATR, neat or as a thin film). Wave numbers are reported in  $\text{cm}^{-1}$ .

### **Microwave reactor**

A Biotage Initiator Sixty microwave reactor with sealed glass vessels was used for the irradiation with microwaves. The temperature was measured using an IR sensor (accuracy  $\pm 2\%$ ). Reaction times indicate how long the mixture was stirred at the specified temperature, not how long the mixture was irradiated overall.

### **Melting points**

The melting points were measured on a Stuart Melting Point SMP 3 device.

### **Low- and high-resolution ESI mass spectra**

Low- and high-resolution ESI mass spectra were obtained on Thermo-Finnigan LCQ (LR) and Bruker Maxis Impact (HR) spectrometers operating in either positive or negative ionization modes, respectively, fitted to Shimadzu AL-10 (LR-ESI-MS) or Dionex Ultima 3000 HPLC systems (HR-ESI-MS).



## Chemical Synthesis and Characterisation

### Standard Procedures

For Standard Procedures, the conditions and ratios of reactants/reagents employed were kept constant. Solvent volumes refer to 1.0 equiv. In general, the *E*- and *Z*- isomers of the azobenzenes were separable by silica-gel chromatography and on TLC when the thermal relaxation half-life time was in the range of minutes or longer. For improving separation, yields and purity of the desired product the crude materials were kept in the dark at room temperature overnight after isolation and protected from UV light during chromatographic separation (i.e. work under red light, wrapped/shielded column wherever possible).

### Standard Procedure A: Diazo Coupling using isoamyl nitrite

To a solution of the aniline (1.0 equiv.) in MeOH (5.0 mL/mmol) conc. HCl (6.0 equiv.) was added and cooled to 0 °C (icebath). In case of Boc-protected anilines the amount of HCl was doubled and the solution was stirred at room temperature until TLC showed full deprotection before cooling down (approx. 2 h). A solution of isoamyl nitrite (1.02 equiv.) in methanol (1.0 mL/mmol) was added slowly and the mixture was stirred for 30 min in the cold.

**A1:** A cold solution of the phenol (1.05 equiv.) in methanol (2.0 mL/mmol) was added followed by addition of NaOH (2.0 M) until pH = 11 was reached (characteristic color change from yellow to deep red).

**A2:** A solution of the phenol (1.05 equiv.) in methanol (2.0 mL/mmol) was basified with NaOH (2.0 M, 7.2 equiv.) and cooled in an icebath. To it was added the solution of the diazonium salt prepared above dropwise over 1 minute.

After 30 minutes stirring at 0 °C, the pH was adjusted to 7 with phosphate buffer (30 mL/mmol) and CHCl<sub>3</sub> (30 mL/mmol) was added. The organic layer was separated followed by extraction of the aqueous layer with CHCl<sub>3</sub> (3 – 5 × 20 mL/mmol). The combined organic extracts were dried with Na<sub>2</sub>SO<sub>4</sub>, filtered, and concentrated under reduced pressure. Purification by silica-gel chromatography or recrystallization provided the pure azobenzene.

**Standard Procedure B:** Phenol etherification in acetone

To a solution of the phenol (1.0 equiv.) and  $K_2CO_3$  (4.0 equiv.) in anhydrous acetone (10 mL/mmol) the alkylhalogenide (1.0 – 10.0 equiv.) was added and stirred at reflux for 2 – 18 h until TLC indicated satisfactory conversion. The reaction mixture was concentrated under reduced pressure. The residue was dissolved in EtOAc (20 mL/mmol) and phosphate buffer (pH = 7, 30 mL/mmol). The organic layer was separated followed by extraction of the aqueous layer with EtOAc (3 × 20 mL/mmol). The combined organic extracts were dried with  $Na_2SO_4$ , filtered, and concentrated under reduced pressure. Purification by silica-gel chromatography or recrystallization provided the aryether.

**Standard Procedure C:** Ester or Imine cleavage with LiOH

Ester or Imine (1.0 equiv.) was dissolved in THF (20 mL/mmol), treated with aqueous LiOH (2 M, 10.0 equiv.), and stirred for 2 h at room temperature. The solution was neutralized with aqueous HCl (1 M). Most of the THF was removed under reduced pressure and  $CHCl_3$  (20 mL/mmol) was added. The organic layer was separated followed by extraction of the aqueous layer with  $CHCl_3$  or EtOAc (3 – 12 × 20 mL/mmol). The combined organic extracts were dried with  $Na_2SO_4$ , filtered, and concentrated under reduced pressure. If necessary, the residue was purified by silica-gel chromatography or prep. HPLC to obtain the carboxylic acid.

**Standard Procedure D:** Buchwald – Hartwig amination

A solution of bromoaryl azobenzene (1.0 equiv.) and  $Cs_2CO_3$  (4.0 equiv.) in anhydrous acetonitrile (25 mL/mmol) was purged with  $N_2$  in a microwave reaction vial over 20 minutes. Amine (2.0 equiv.),  $Pd(dba)_2$  (0.1 equiv.) and RuPhos (0.2 equiv.) were added and the vial was capped under nitrogen flow. The resulting suspension was heated with stirring to 100 °C and kept at this temperature until TLC indicated satisfactory conversion (typically 16 h). The

mixture was cooled to RT, filtered, and concentrated under reduced pressure. Purification by silica-gel chromatography provided the aminated azobenzene.

**Standard Procedure E:** Reductive amination

To a solution of amine (1.0 equiv.) in a mixture of AcOH and EtOH (1:9, 25 mL/mmol) aldehyde (3.0 equiv.) was added and stirred for 2 hours at room temperature. The mixture was cooled to 0 °C (icebath) and NaCNBH<sub>3</sub> (4.5 equiv.) was added. The icebath was removed and stirring was continued until TLC indicated satisfactory conversion (16 – 38 h). The solution was neutralized with aqueous NaOH (2 M) and most of the EtOH was removed under reduced pressure followed by extraction of the aqueous phase with CHCl<sub>3</sub> (3 × 20 mL/mmol). The combined organic extracts were dried with Na<sub>2</sub>SO<sub>4</sub>, filtered, and concentrated under reduced pressure. Purification by silica-gel chromatography provided the pure azobenzene.

**Standard Procedure F:** Reduction of nitroaryl compounds

Nitrobenzene (1.0 equiv.) was dissolved in a mixture of EtOH, EtOAc and AcOH (5:10:1, 50 mL/mmol). Pd/C (10 m%, 55 mg/mmol) was added and H<sub>2</sub> was bubbled through the solution until TLC indicates satisfactory conversion (6 – 24 h). The mixture was filtered through a pad of celite and the filter cake was washed with EtOH (~100 mL/mmol). Toluene (5 mL/mmol) was added and the mixture was concentrated under reduced pressure. The resulting crude product was dried under vacuum and used without further purification.

## Syntheses

### Ethyl-2-(4'-((4''-bromophenyl)diazenyl)phenoxy)acetate **1a**

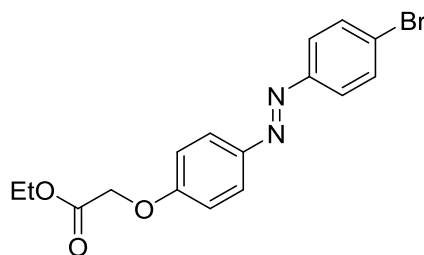

Standard Procedure **B** with azobenzene **31** (1.10 g, 4.0 mmol, 1.0 equiv.) and ethyl bromoacetate (1.45 mL, 13.1 mmol, 3.3 equiv.) gave azobenzene **1a** (1.20 g, 83 %) as a yellow solid after recrystallization (toluene/petroleum ether, 1:4).  $R_f = 0.55$  (EtOAc/petroleum ether, 1:4); m.p. 203 °C;  $^1\text{H-NMR}$  (300MHz,  $\text{CDCl}_3$ ):  $\delta = 7.92$  (d,  $J = 9.0$  Hz, 2 H), 7.77 (d,  $J = 8.6$  Hz, 2 H), 7.64 (d,  $J = 8.5$  Hz, 2 H), 7.03 (d,  $J = 9.0$  Hz, 2 H), 4.71 (s, 2 H), 4.31 (q,  $J = 7.1$  Hz, 2 H), 1.32 (t,  $J = 7.1$  Hz, 3 H);  $^{13}\text{C-NMR}$  (75MHz,  $\text{CDCl}_3$ ):  $\delta = 168.4, 160.3, 151.4, 147.4, 132.2, 124.9, 124.8, 124.1, 115.0, 65.5, 61.6, 14.2$ ; IR:  $\tilde{\nu} = 3167, 3024, 2816, 1740, 1570, 1473, 1409, 1219, 1060, 834$ ; UV-VIS ( $\text{CH}_3\text{CN} + 0.5\%$  piperidine):  $\lambda_{\text{max}} (\epsilon) = 464$  nm ( $19800 \text{ l}\cdot\text{mol}^{-1}\cdot\text{cm}^{-1}$ ); HRMS (ESI):  $m/z$  calcd for  $\text{C}_{16}\text{H}_{16}\text{BrN}_2\text{O}_3$ : 363.0339/365.0320  $[\text{M}+\text{H}]^+$ ; found: 363.0344/365.0327.

### Ethyl-2-(4'-((4''-(dimethylamino)phenyl)diazenyl)phenoxy)acetate **1b**

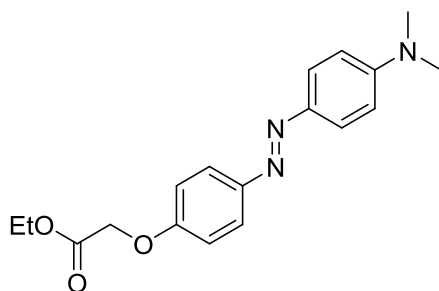

Standard Procedure **D** with azobenzene **1a** (50.0 mg, 0.14 mmol, 1.0 equiv.), dimethylamine hydrochloride (22.5 mg, 0.28 mmol, 2.0 equiv.) and  $\text{Cs}_2\text{CO}_3$  (269 mg, 0.83 mmol, 6.0 equiv.) gave azobenzene **1b** (39.1 mg, 87 %) as a scarlet solid after silica-gel chromatography ( $\text{CH}_2\text{Cl}_2/\text{MeOH}$ , 20:1).  $R_f = 0.26$  ( $\text{CH}_2\text{Cl}_2/\text{MeOH}$ , 20:1); m.p. 142 °C;  $^1\text{H-NMR}$  (300 MHz,  $\text{CDCl}_3$ ):  $\delta = 7.86$  (d,  $J = 3.3$  Hz, 2 H), 7.83 (d,  $J = 3.1$  Hz, 2 H), 7.00 (d,  $J = 8.9$  Hz, 2 H), 6.77 (d,  $J = 9.1$  Hz, 2 H), 4.69 (s, 2 H), 4.30 (q,  $J = 7.2$  Hz, 2 H), 3.09 (s, 6 H), 1.32 (t,  $J = 7.1$  Hz, 3 H);  $^{13}\text{C-NMR}$  (101MHz,  $\text{CDCl}_3$ ):  $\delta = 168.7, 158.9, 152.1, 148.1, 143.6, 124.6, 123.3, 114.8,$

111.5, 65.6, 61.5, 40.3, 14.2; IR:  $\tilde{\nu}$  = 3460, 3082, 2961, 2820, 1738, 1597, 1366, 1207, 1083, 838; UV-VIS (CH<sub>3</sub>CN + 0.5 % piperidine):  $\lambda_{max}$  ( $\epsilon$ ) = 409 nm (24700 l·mol<sup>-1</sup>·cm<sup>-1</sup>); HRMS (ESI):  $m/z$  calcd for C<sub>18</sub>H<sub>22</sub>N<sub>3</sub>O<sub>3</sub>: 328.1656 [M+H]<sup>+</sup>; found: 328.1658.

Ethyl-2-(4'-((4''-morpholinophenyl)diazenyl)phenoxy)acetate **1c**

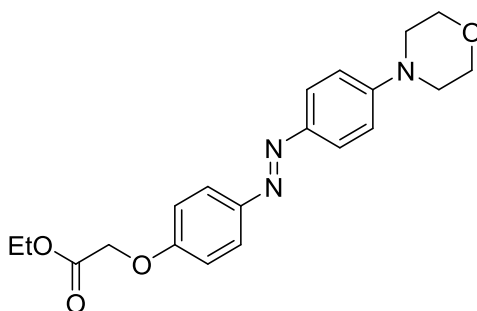

Standard Procedure **D** with azobenzene **1a** (50.0 mg, 0.14 mmol, 1.0 equiv.) and morpholine (24.0 mg, 0.28 mmol, 2.0 equiv.) gave azobenzene **1c** (40.2 mg, 79 %) as an orange solid after silica-gel chromatography (EtOAc/petroleum ether, 1:4 → 1:2).  $R_f$  = 0.28 (EtOAc/petroleum ether, 1:4); m.p. 160 °C; <sup>1</sup>H-NMR (300 MHz, CDCl<sub>3</sub>):  $\delta$  = 7.87 (d,  $J$  = 9.0 Hz, 2 H), 7.87 (d,  $J$  = 9.0 Hz, 2 H), 7.01 (d,  $J$  = 9.1 Hz, 2 H), 6.98 (d,  $J$  = 9.1 Hz, 2 H), 4.70 (s, 2 H), 4.30 (q,  $J$  = 7.2 Hz, 2 H), 3.95 - 3.82 (m, 4 H), 3.35 - 3.28 (m, 4 H), 1.32 (t,  $J$  = 7.2 Hz, 3 H); <sup>13</sup>C-NMR (75 MHz, CDCl<sub>3</sub>):  $\delta$  = 168.6, 159.3, 152.8, 147.9, 145.8, 124.3, 124.1, 114.9, 114.5, 66.7, 65.5, 61.5, 48.2, 14.2; IR:  $\tilde{\nu}$  = 3464, 2963, 2843, 1759, 1578, 1366, 1246, 1153, 921, 841; UV-VIS (CH<sub>3</sub>CN + 0.5 % piperidine):  $\lambda_{max}$  ( $\epsilon$ ) = 392 nm (26200 l·mol<sup>-1</sup>·cm<sup>-1</sup>); HRMS (ESI):  $m/z$  calcd for C<sub>20</sub>H<sub>24</sub>N<sub>3</sub>O<sub>4</sub>: 370.1761 [M+H]<sup>+</sup>; found: 370.1766.

Ethyl-2-(4'-((4'''-methylpiperazin-1-yl)phenyl)diazenyl)phenoxy)acetate **1d**

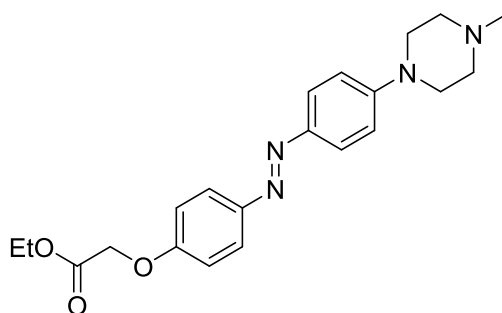

Standard Procedure **D** with azobenzene **1a** (100.0 mg, 0.28 mmol, 1.0 equiv.) and 1-methylpiperazine (55.2 mg, 0.55 mmol, 2.0 equiv.) gave azobenzene **1d** (89.0 mg, 85 %) as a yellow solid after silica-gel chromatography (CH<sub>2</sub>Cl<sub>2</sub>/MeOH, 80:1 → 20:1).  $R_f$  = 0.25

(CH<sub>2</sub>Cl<sub>2</sub>/MeOH, 20:1); m.p. 150 °C; <sup>1</sup>H-NMR (300 MHz, CDCl<sub>3</sub>): δ = 7.87 (d, *J* = 3.4 Hz, 2 H), 7.84 (d, *J* = 3.4 Hz, 2 H), 7.01 (d, *J* = 8.2 Hz, 2 H), 6.98 (d, *J* = 8.2 Hz, 2 H), 4.70 (s, 2 H), 4.30 (q, *J* = 7.2 Hz, 2 H), 3.43 - 3.34 (m, 4 H), 2.64 - 2.55 (m, 4 H), 2.38 (s, 3 H), 1.32 (t, *J* = 7.1 Hz, 3 H); <sup>13</sup>C-NMR (75 MHz, CDCl<sub>3</sub>): δ = 168.6, 159.2, 152.8, 148.0, 145.4, 124.3, 124.1, 114.8, 114.7, 65.5, 61.5, 54.9, 47.9, 46.1, 14.2; IR:  $\tilde{\nu}$  = 3460, 2931, 2839, 2793, 1751, 1736, 1581, 1497, 1443, 1377, 1220, 834; UV-VIS (CH<sub>3</sub>CN + 0.5 % piperidine):  $\lambda_{max}$  ( $\epsilon$ ) = 396 nm (27300 l·mol<sup>-1</sup>·cm<sup>-1</sup>); HRMS (ESI): *m/z* calcd for C<sub>21</sub>H<sub>27</sub>N<sub>4</sub>O<sub>3</sub>: 383.2078 [M+H]<sup>+</sup>; found: 383.2084.

Ethyl-2-(4'-((4''-acetamidophenyl)diazenyl)phenoxy)acetate **1e**

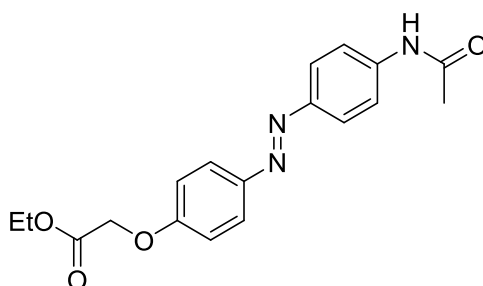

Standard Procedure **D** with azobenzene **1a** (100.0 mg, 0.28 mmol, 1.0 equiv.), and acetamide (32.5 mg, 0.55 mmol, 2.0 equiv.) gave azobenzene **1e** (61.2 mg, 65 %) as an orange solid after silica-gel chromatography (CH<sub>2</sub>Cl<sub>2</sub>/MeOH, 9:1). *R<sub>f</sub>* = 0.40 (CH<sub>2</sub>Cl<sub>2</sub>/MeOH, 9:1); m.p. 192 °C; <sup>1</sup>H-NMR (400 MHz, CDCl<sub>3</sub>): δ = 7.92 (d, *J* = 6.7 Hz, 2 H), 7.90 (d, *J* = 6.7 Hz, 2 H), 7.68 (d, *J* = 8.5 Hz, 2 H), 7.34 (s, 1 H), 7.04 (d, *J* = 8.8 Hz, 2 H), 4.72 (s, 2 H), 4.32 (q, *J* = 7.2 Hz, 2 H), 2.25 (s, 3 H), 1.34 (t, *J* = 7.2 Hz, 3 H); <sup>13</sup>C-NMR (101 MHz, CDCl<sub>3</sub>): δ = 168.5, 168.2, 159.9, 149.1, 147.7, 140.0, 124.6, 123.7, 119.7, 114.9, 65.5, 61.6, 24.8, 14.2; IR:  $\tilde{\nu}$  = 3005, 2913, 2322, 1717, 1601, 1504, 1377, 1203, 1076, 837, 714; UV-VIS (CH<sub>3</sub>CN + 0.5 % piperidine):  $\lambda_{max}$  ( $\epsilon$ ) = 361 nm (25700 l·mol<sup>-1</sup>·cm<sup>-1</sup>); HRMS (ESI): *m/z* calcd for C<sub>18</sub>H<sub>20</sub>N<sub>3</sub>O<sub>4</sub>: 342.1448 [M+H]<sup>+</sup>; found: 342.1451.

Methyl-2-(4'-((4''-methoxyphenyl)diazenyl)phenoxy)acetate **1f**

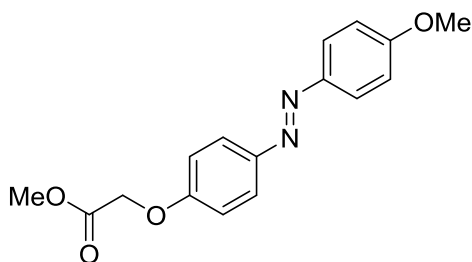

Standard Procedure **B** with azobenzene **25f** (30 mg, 0.10 mmol, 1.0 equiv.) and MeI (104 mg, 0.73 mmol, 7.0 equiv.) gave azobenzene **1f** (26 mg, 83 %) as a yellow solid after purification by silica-gel chromatography (EtOAc/petroleum ether, 1:2).  $R_f = 0.58$  (EtOAc/petroleum ether, 1:2); m.p. 149 °C;  $^1\text{H-NMR}$  (300 MHz,  $\text{CDCl}_3$ ):  $\delta = 7.86$  (dd,  $J = 1.1, 9.0$  Hz, 4 H), 6.99 (dd,  $J = 1.9, 8.9$  Hz, 4 H), 4.70 (s, 2 H), 3.87 (s, 3 H), 3.81 (s, 3 H);  $^{13}\text{C-NMR}$  (101 MHz,  $\text{CDCl}_3$ ):  $\delta = 169.0, 161.7, 159.5, 147.8, 147.0, 124.5, 124.4, 114.9, 114.2, 65.4, 55.6, 52.4$ ; IR:  $\tilde{\nu} = 2955, 2322, 1766, 1578, 1493, 1211, 1026, 840$ ; UV-VIS ( $\text{CH}_3\text{CN} + 0.5\%$  piperidine):  $\lambda_{\text{max}} (\epsilon) = 354$  nm ( $26000 \text{ l}\cdot\text{mol}^{-1}\cdot\text{cm}^{-1}$ ); HRMS (ESI):  $m/z$  calcd for  $\text{C}_{16}\text{H}_{17}\text{N}_2\text{O}_4$ : 301.1183  $[\text{M}+\text{H}]^+$ ; found: 301.1183.

Ethyl-2-(4'-((4''-(1''',3'''-dioxoisindolin-2'''-yl)phenyl)diazenyl)phenoxy)acetate **1g**

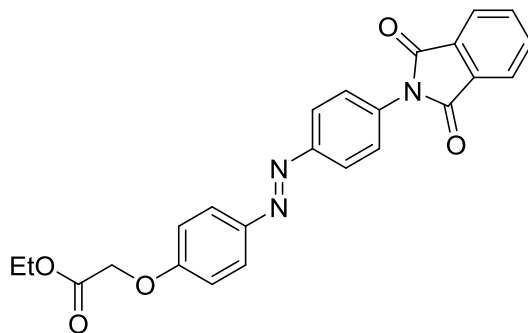

Bromaryl azobenzene **1a** (50.0 mg, 0.14 mmol, 1.0 equiv.) CuI (39.3 mg, 0.21 mmol, 1.5 equiv.), and potassium phthalimide (38.3 mg, 0.21 mmol, 1.5 equiv.) were placed in a microwave reaction vial. The vial was sealed, and the atmosphere replaced by nitrogen. The solids were suspended in dry DMF (4 mL), and the vial was heated for 9 h to 160 °C. After cooling aqueous HCl (1 M, 3 mL) was added, followed by extraction with  $\text{CHCl}_3$  ( $3 \times 10$  mL). The combined organic extracts were washed with  $\text{H}_2\text{O}$  (20 mL), and brine (20 mL), dried with  $\text{Na}_2\text{SO}_4$ , filtered, and concentrated under reduced pressure. Purification by silica-gel chromatography (EtOAc/petroleum ether, 1:9  $\rightarrow$  1:1) provided pure azobenzene **1g** (42.0 mg, 71 %) as an ochre solid.  $R_f = 0.39$  (EtOAc/petroleum ether, 1:2); m.p. 189 °C;  $^1\text{H-NMR}$  (300 MHz,  $\text{CDCl}_3$ ):  $\delta = 8.06 - 7.92$  (m, 6 H), 7.84 - 7.80 (m,  $J = 3.1, 5.5$  Hz, 2 H),

7.64 (d,  $J = 8.8$  Hz, 2 H), 7.04 (d,  $J = 9.0$  Hz, 2 H), 4.72 (s, 2 H), 4.31 (q,  $J = 7.2$  Hz, 2 H), 1.33 (t,  $J = 7.2$  Hz, 3 H);  $^{13}\text{C-NMR}$  (75 MHz,  $\text{CDCl}_3$ ):  $\delta = 168.4, 167.1, 160.3, 151.5, 147.6, 134.6, 133.5, 131.7, 126.8, 124.9, 123.9, 123.3, 114.9, 65.5, 61.6, 14.2$ ; IR:  $\tilde{\nu} = 3375, 2990, 2322, 1740, 1694, 1524, 1223, 1153, 1080, 841$ ; UV-VIS ( $\text{CH}_3\text{CN} + 0.5\%$  piperidine):  $\lambda_{\text{max}}(\epsilon) = 351$  nm ( $25300 \text{ l}\cdot\text{mol}^{-1}\cdot\text{cm}^{-1}$ ); HRMS (ESI):  $m/z$  calcd for  $\text{C}_{24}\text{H}_{20}\text{N}_3\text{O}_5$ : 430.1397  $[\text{M}+\text{H}]^+$ ; found: 430.1410.

Ethyl -2-(4'-((4''-methyl-3'',4''-dihydro-2''*H*-benzo[b][1'',4'']oxazin-7-yl)diazenyl)phenoxy)acetate **2a**

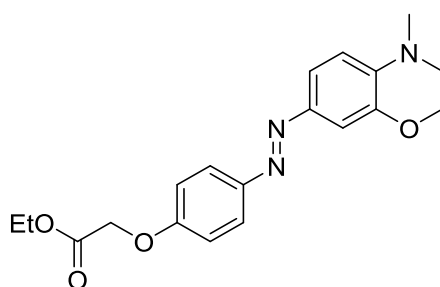

Standard Procedure **E** with azobenzene **19** (66 mg, 0.19 mmol, 1.0 equiv.) and paraformaldehyde (17 mg, 0.58 mmol, 3.0 equiv.) gave azobenzene **2a** (57 mg, 83 %) as an orange solid after purification by silica-gel chromatography ( $\text{CHCl}_3$ ).  $R_f = 0.31$  ( $\text{CH}_2\text{Cl}_2$ ); m.p.  $112$  °C;  $^1\text{H-NMR}$  (300 MHz,  $\text{CDCl}_3$ ):  $\delta = 7.83$  (d,  $J = 9.0$  Hz, 2 H), 7.52 (dd,  $J = 2.2, 8.6$  Hz, 1 H), 7.40 (d,  $J = 2.1$  Hz, 1 H), 7.00 (d,  $J = 9.0$  Hz, 2 H), 6.72 (d,  $J = 8.7$  Hz, 1 H), 4.69 (s, 2 H), 4.36 - 4.24 (m, 4 H), 3.43 - 3.37 (m, 2 H), 3.02 (s, 3 H), 1.32 (t,  $J = 7.2$  Hz, 3 H);  $^{13}\text{C-NMR}$  (101 MHz,  $\text{CDCl}_3$ ):  $\delta = 168.6, 159.0, 148.0, 144.8, 144.0, 139.1, 124.0, 120.6, 114.8, 110.8, 107.7, 65.6, 64.4, 61.5, 48.9, 38.5, 14.2$ ; IR:  $\tilde{\nu} = 3460, 2075, 2972, 1739, 1582, 1520, 1377, 1203, 810$ ; UV-VIS ( $\text{CH}_3\text{CN} + 0.5\%$  piperidine):  $\lambda_{\text{max}}(\epsilon) = 419$  nm ( $26800 \text{ l}\cdot\text{mol}^{-1}\cdot\text{cm}^{-1}$ ); HRMS (ESI):  $m/z$  calcd for  $\text{C}_{19}\text{H}_{22}\text{N}_3\text{O}_4$ : 356.1605  $[\text{M}+\text{H}]^+$ ; found: 356.1606.



Ethyl-2-(4'-((4''-benzyl-3'',4''-dihydro-2''-H-benzo[b][1'',4'']oxazin-7-yl)diazenyl)phenoxy)acetate **2b**

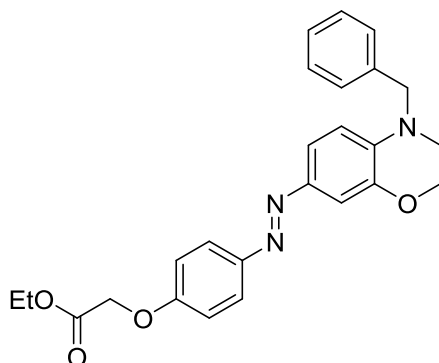

Standard Procedure **E** with azobenzene **19** (124 mg, 0.36 mmol, 1.0 equiv.) and benzaldehyde (116 mg, 1.09 mmol, 3.0 equiv.) gave azobenzene **2b** (105 mg, 68 %) as an orange solid after purification with silica-gel chromatography (CH<sub>2</sub>Cl<sub>2</sub>/petroleum ether, 1:1 → 2:1). *R<sub>f</sub>* = 0.14 (CH<sub>2</sub>Cl<sub>2</sub>); m.p. 193 °C; <sup>1</sup>H-NMR (300 MHz, CDCl<sub>3</sub>): δ = 7.83 (d, *J* = 9.0 Hz, 2 H), 7.46 (qd, *J* = 2.3, 4.6 Hz, 2 H), 7.40 - 7.26 (m, 5 H), 7.00 (d, *J* = 9.0 Hz, 2 H), 6.74 (d, *J* = 9.2 Hz, 1 H), 4.69 (s, 2 H), 4.59 (s, 2 H), 4.36 - 4.25 (m, 4 H), 3.54 - 3.46 (m, 3 H), 1.32 (t, *J* = 7.1 Hz, 3 H); <sup>13</sup>C-NMR (75 MHz, CDCl<sub>3</sub>): δ = 168.6, 159.0, 148.0, 144.6, 143.8, 138.3, 137.1, 128.8, 127.4, 126.9, 124.0, 120.6, 114.8, 111.1, 108.5, 65.6, 64.3, 61.5, 54.5, 47.4, 14.2; IR:  $\tilde{\nu}$  = 3460, 2909, 2870, 2326, 1763, 1582, 1246, 1080, 880, 810; UV-VIS (CH<sub>3</sub>CN + 0.5 % piperidine):  $\lambda_{max}$  ( $\epsilon$ ) = 420 nm (25300 l·mol<sup>-1</sup>·cm<sup>-1</sup>); HRMS (ESI): *m/z* calcd for C<sub>25</sub>H<sub>26</sub>N<sub>3</sub>O<sub>4</sub>: 432.1918 [M+H]<sup>+</sup>; found: 432.1921.

Ethyl-2-(4'-((3'',5''-trimethoxyphenyl)diazenyl)phenoxy)acetate **3**

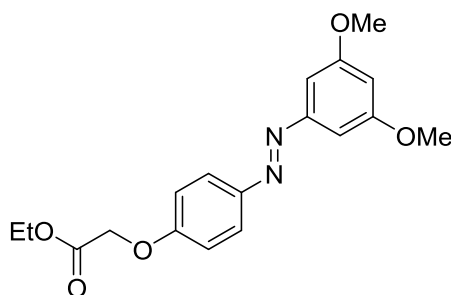

Standard Procedure **B** with azobenzene **22** (199 mg, 0.77 mmol, 1.0 equiv.) and ethyl bromoacetate (282  $\mu$ L, 13.4 mmol, 3.3 equiv.) gave azobenzene **3** (241 mg, 91 %) as an orange solid after purification by silica-gel chromatography (EtOAc/petroleum ether, 1:4). *R<sub>f</sub>* = 0.40 (EtOAc/petroleum ether, 1:4); m.p. 93 °C; <sup>1</sup>H-NMR (400 MHz, CDCl<sub>3</sub>): δ = 7.94 (d, *J* = 9.1 Hz, 2 H), 7.11 (d, *J* = 2.3 Hz, 2 H), 7.05 (d, *J* = 9.1 Hz, 2 H), 6.60 (t, *J* = 2.3 Hz, 1

H), 4.72 (s, 2 H), 4.32 (q,  $J = 7.0$  Hz, 2 H), 3.89 (s, 6 H), 1.33 (t,  $J = 7.2$  Hz, 3 H);  $^{13}\text{C}$ -NMR (101 MHz,  $\text{CDCl}_3$ ):  $\delta = 168.5, 161.1, 160.2, 154.5, 147.4, 124.8, 114.9, 103.5, 100.7, 65.5, 61.6, 55.6, 14.2$ ; IR:  $\tilde{\nu} = 3062, 2908, 1762, 1582, 1412, 1210, 1145, 852, 829, 675$ ; UV-VIS ( $\text{CH}_3\text{CN} + 0.5\%$  piperidine):  $\lambda_{\text{max}} (\epsilon) = 345$  nm ( $20100 \text{ l}\cdot\text{mol}^{-1}\cdot\text{cm}^{-1}$ ); HRMS (ESI):  $m/z$  calcd for  $\text{C}_{18}\text{H}_{21}\text{N}_2\text{O}_5$ : 345.1445  $[\text{M}+\text{H}]^+$ ; found: 345.1450.

Ethyl-2-((5'-((3'',4'',5''-trimethoxyphenyl)diazenyl)quinolin-8'-yl)oxy)acetate **4a**

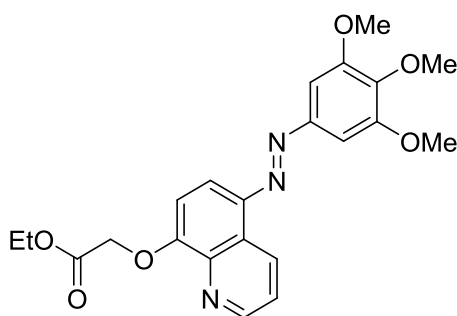

Standard Procedure **B** with azobenzene **46a** (359 mg, 1.06 mmol, 1.0 equiv.) and ethyl bromoacetate (0.47 mL, 4.23 mmol, 4.0 equiv.) gave azobenzene **4a** (362 mg, 80 %) as an orange solid after silica-gel chromatography ( $\text{CH}_2\text{Cl}_2/\text{MeOH}$ , 9:1).  $R_f = 0.41$  ( $\text{CH}_2\text{Cl}_2/\text{MeOH}$ , 95:5); m.p. 114 °C;  $^1\text{H}$ -NMR (250 MHz,  $\text{CDCl}_3$ ):  $\delta = 9.27$  (d,  $J = 8.2$  Hz, 1 H), 9.07 (d,  $J = 2.4$  Hz, 1 H), 7.91 (d,  $J = 8.6$  Hz, 1 H), 7.64 (dd,  $J = 3.8, 8.3$  Hz, 1 H), 7.32 (s, 2 H), 7.05 (d,  $J = 8.6$  Hz, 1 H), 5.06 (s, 2 H), 4.30 (q,  $J = 7.1$  Hz, 2 H), 4.01 (s, 6 H), 3.96 (s, 3 H), 1.29 (t,  $J = 7.1$  Hz, 3 H);  $^{13}\text{C}$ -NMR (63 MHz,  $\text{CDCl}_3$ ):  $\delta = 168.3, 156.1, 153.6, 150.1, 148.9, 141.6, 140.7, 139.8, 132.1, 127.9, 122.5, 113.1, 108.9, 100.5, 66.2, 61.6, 61.1, 56.2, 14.1$ ; IR:  $\tilde{\nu} = 2970, 2835, 1732, 1566, 1493, 1308, 1199, 1126, 999, 840$ ; UV-VIS ( $\text{CH}_3\text{CN} + 0.5\%$  piperidine):  $\lambda_{\text{max}} (\epsilon) = 389$  nm ( $20900 \text{ l}\cdot\text{mol}^{-1}\cdot\text{cm}^{-1}$ ); HRMS (ESI):  $m/z$  calcd for  $\text{C}_{22}\text{H}_{24}\text{N}_3\text{O}_6$ : 426.1660  $[\text{M}+\text{H}]^+$ ; found: 426.1666.

Ethyl-2-((4'-((3'',4'',5''-trimethoxyphenyl)diazenyl)naphth-1'-yl)oxy)acetate **4b**

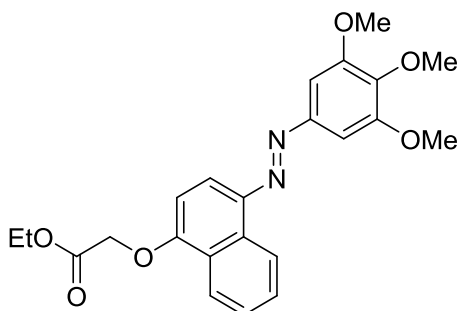

Standard Procedure **B** with azobenzene **46b** (363 mg, 1.07 mmol, 1.0 equiv.) and ethyl bromoacetate (0.48 mL, 4.30 mmol, 4.0 equiv.) gave azobenzene **4b** (436 mg, 96 %) as an orange solid after silica-gel chromatography (EtOAc/petroleum ether, 1:4  $\rightarrow$  1:2).  $R_f = 0.23$  (EtOAc/petroleum ether, 1:4); m.p. 99 °C;  $^1\text{H-NMR}$  (250 MHz,  $\text{CDCl}_3$ ):  $\delta = 8.93$  (d,  $J = 8.1$  Hz, 1 H), 8.47 (d,  $J = 7.9$  Hz, 1 H), 7.84 (d,  $J = 8.4$  Hz, 1 H), 7.73 (ddd,  $J = 1.3, 6.8, 8.1$  Hz, 1 H), 7.65 (ddd,  $J = 1.3, 7.0, 8.2$  Hz, 1 H), 7.37 (s, 2 H), 6.83 (d,  $J = 8.4$  Hz, 1 H), 4.92 (s, 2 H), 4.35 (q,  $J = 7.1$  Hz, 2 H), 4.04 (s, 6 H), 3.98 (s, 3 H), 1.35 (t,  $J = 7.1$  Hz, 3 H);  $^{13}\text{C-NMR}$  (101 MHz,  $\text{CDCl}_3$ ):  $\delta = 168.4, 156.3, 153.6, 149.2, 142.5, 140.4, 132.5, 127.7, 126.2, 125.7, 123.0, 122.4, 112.5, 104.8, 100.4, 65.8, 61.6, 61.1, 56.3, 14.2$ ; IR:  $\tilde{\nu} = 2940, 2835, 1755, 1578, 1470, 1207, 1107, 991, 845, 768$ ; UV-VIS ( $\text{CH}_3\text{CN} + 0.5\%$  piperidine):  $\lambda_{\text{max}} (\epsilon) = 397$  nm ( $20100 \text{ l}\cdot\text{mol}^{-1}\cdot\text{cm}^{-1}$ ); HRMS (ESI):  $m/z$  calcd for  $\text{C}_{23}\text{H}_{25}\text{N}_2\text{O}_6$ : 425.1707  $[\text{M}+\text{H}]^+$ ; found: 425.1711.

Ethyl-2-((4'-((3'',4'',5''-trimethoxyphenyl)diazenyl)-5'-methoxynaphth-1-yl)oxy)acetate **4c**

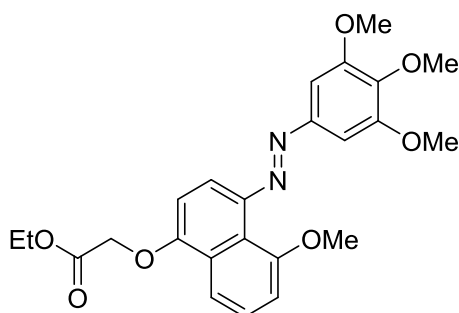

Standard Procedure **A1** with 3,4,5-trimethoxyaniline (183 mg, 1.0 mmol, 1.0 equiv.) and naphthol **45c** (183 mg, 1.05 mmol, 1.05 equiv.) gave crude azobenzene **46c** (185 mg) after evaporation of the solvent. The crude material was directly converted according to Standard Procedure **B** with ethyl bromoacetate (89  $\mu\text{L}$ , 2.0 mmol, 4.0 equiv.). Azobenzene **4c** (61 mg, 13 %) was isolated as an orange solid after silica-gel chromatography (EtOAc/petroleum ether, 1:2).  $R_f = 0.64$  (EtOAc/petroleum ether, 1:2); m.p. 143 °C;  $^1\text{H-NMR}$  (250 MHz,  $\text{CDCl}_3$ ):  $\delta = 8.10$  (d,  $J = 7.9$  Hz, 1 H), 7.53 (t,  $J = 8.1$  Hz, 1 H), 7.36 (s, 2 H), 7.27 (d,  $J = 8.4$  Hz, 1 H), 7.08 (d,  $J = 7.7$  Hz, 1 H), 6.79 (d,  $J = 8.4$  Hz, 1 H), 4.87 (s, 2 H), 4.34 (q,  $J = 7.1$  Hz, 2 H), 4.02 (s, 6 H), 3.98 (s, 3 H), 3.97 (s, 3 H), 1.34 (t,  $J = 7.1$  Hz, 3 H);  $^{13}\text{C-NMR}$  (63 MHz,  $\text{CDCl}_3$ ):  $\delta = 169.4, 157.6, 155.7, 154.5, 150.0, 147.1, 141.0, 128.8, 127.4, 122.6, 116.1, 113.8, 109.7, 106.2, 101.4, 66.8, 62.4, 62.0, 57.4, 57.1, 15.1$ ; IR:  $\tilde{\nu} = 2909, 2839, 1759, 1593, 1412, 1207, 1084, 1002, 760$ ; UV-VIS ( $\text{CH}_3\text{CN} + 0.5\%$  piperidine):  $\lambda_{\text{max}} (\epsilon) = 388$  nm

(20300 l·mol<sup>-1</sup>·cm<sup>-1</sup>); HRMS (ESI):  $m/z$  calcd for C<sub>24</sub>H<sub>27</sub>N<sub>2</sub>O<sub>7</sub>: 455.1813 [M+H]<sup>+</sup>; found: 455.1824.

Ethyl-2-((4'-((3'',4'',5''-trimethoxyphenyl)diazenyl)-6',7'-dimethoxynaphth-1'-yl)oxy)acetate **4d**

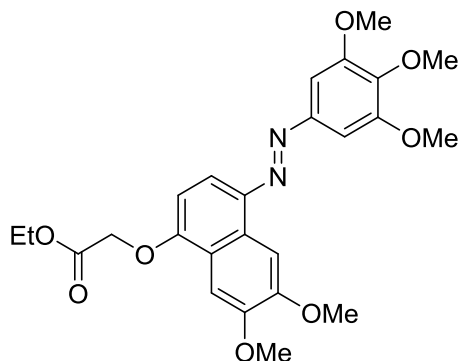

Standard Procedure **B** with azobenzene **46d** (422 mg, 1.06 mmol, 1.0 equiv.) and ethyl bromoacetate (0.47 mL, 4.24 mmol, 4.0 equiv.) gave azobenzene **4d** (424 mg, 83 %) as an orange solid after silica-gel chromatography (EtOAc/petroleum ether, 1:2 → 1:1).  $R_f$  = 0.53 (EtOAc/petroleum ether, 1:2); m.p. 123 °C; <sup>1</sup>H-NMR (250 MHz, CDCl<sub>3</sub>):  $\delta$  = 8.25 (s, 1 H), 7.70 (s, 1 H), 7.71 (d,  $J$  = 8.4 Hz, 1 H), 7.32 (s, 2 H), 6.70 (d,  $J$  = 8.6 Hz, 1 H), 4.89 (s, 2 H), 4.32 (q,  $J$  = 7.1 Hz, 2 H), 4.09 (s, 3 H), 4.09 (s, 3 H), 4.00 (s, 6 H), 3.96 (s, 3 H), 1.33 (t,  $J$  = 7.1 Hz, 3 H); <sup>13</sup>C-NMR (101 MHz, CDCl<sub>3</sub>):  $\delta$  = 168.5, 155.4, 153.5, 150.5, 149.6, 149.3, 141.5, 140.3, 129.0, 121.2, 111.5, 104.0, 101.9, 101.2, 100.3, 65.8, 61.5, 61.1, 56.1, 55.9, 55.7, 14.2; IR:  $\tilde{\nu}$  = 2940, 2828, 1732, 1585, 1485, 1211, 1118, 1038, 1011, 818; UV-VIS (CH<sub>3</sub>CN + 0.5 % piperidine):  $\lambda_{max}$  ( $\epsilon$ ) = 408 nm (21300 l·mol<sup>-1</sup>·cm<sup>-1</sup>); HRMS (ESI):  $m/z$  calcd for C<sub>25</sub>H<sub>29</sub>N<sub>2</sub>O<sub>8</sub>: 485.1918 [M+H]<sup>+</sup>; found: 485.1927.

*N*-(5'-Methoxy-2'-((4''-methoxyphenyl)diazenyl)phenyl)succinamic acid **5a**

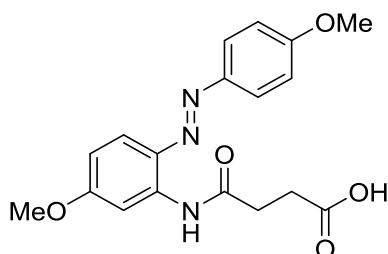

Standard Procedure **C** with ester **29a** (60.0 mg, 0.16 mmol, 1.0 equiv.) gave carboxylic acid **5a** (57 mg, 99 %) as a chartreuse solid after evaporation of the solvent.  $R_f$  = 0.23 (CH<sub>2</sub>Cl<sub>2</sub>/MeOH, 95:5); m.p. 167 °C; <sup>1</sup>H-NMR (300 MHz, DMSO-*d*<sub>6</sub>):  $\delta$  = 12.19 (s, 1 H), 10.22 (s, 1 H), 8.04 (d,  $J$  = 2.8 Hz, 1 H), 8.00 (d,  $J$  = 8.9 Hz, 2 H), 7.74 (d,  $J$  = 9.0 Hz, 1 H),

7.13 (d,  $J = 9.0$  Hz, 2 H), 6.78 (dd,  $J = 2.8, 9.1$  Hz, 1 H), 3.87 (s, 3 H), 3.84 (s, 3 H), 2.79 (t,  $J = 6.5$  Hz, 2 H), 2.58 (t,  $J = 6.7$  Hz, 2 H);  $^{13}\text{C}$ -NMR (101 MHz, DMSO- $d_6$ ):  $\delta = 174.3, 171.3, 162.5, 162.0, 146.9, 138.6, 134.9, 125.2, 119.1, 114.9, 110.4, 105.9, 56.1, 56.0, 32.1, 29.3$ ; IR:  $\tilde{\nu} = 3368, 2924, 2592, 1713, 1578, 1470, 1231, 1146, 1026, 833$ ; UV-VIS (CH<sub>3</sub>CN + 0.5 % piperidine):  $\lambda_{\text{max}} (\epsilon) = 386$  nm (21400 l·mol<sup>-1</sup>·cm<sup>-1</sup>); HRMS (ESI):  $m/z$  calcd for C<sub>18</sub>H<sub>20</sub>N<sub>3</sub>O<sub>5</sub>: 358.1397 [M+H]<sup>+</sup>; found: 358.1402.

*N*-(2'-((4''-(Dimethylamino)phenyl)diazenyl)-5'-methoxyphenyl)succinamic acid **5b**

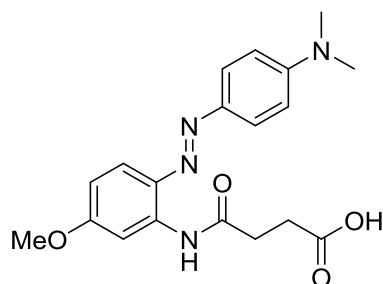

Standard Procedure **C** with ester **30b** (38 mg, 0.11 mmol, 1.0 equiv.) gave carboxylic acid **5b** (33 mg, 83 %) as an orange solid after purification by preparative HPLC (H<sub>2</sub>O/CH<sub>3</sub>CN, 70:30 → 0:100).  $R_f = 0.18$  (CH<sub>2</sub>Cl<sub>2</sub>/MeOH, 8:2); m.p. 286 °C;  $^1\text{H}$ -NMR (300 MHz, DMSO- $d_6$ ):  $\delta = 11.75$  (s, 1 H), 8.16 (d,  $J = 2.7$  Hz, 1 H), 8.10 (d,  $J = 9.0$  Hz, 2 H), 7.66 (d,  $J = 9.0$  Hz, 1 H), 6.79 (d,  $J = 9.1$  Hz, 2 H), 6.66 (dd,  $J = 2.8, 9.0$  Hz, 1 H), 3.79 (s, 3 H), 3.05 (s, 6 H), 2.50 - 2.48 (m, 2 H), 2.25 - 2.19 (m, 2 H);  $^{13}\text{C}$ -NMR (101 MHz, DMSO- $d_6$ ):  $\delta = 174.6, 173.8, 161.4, 152.3, 143.9, 139.2, 135.3, 126.0, 117.1, 112.0, 109.4, 105.5, 55.8, 39.4, 36.2, 34.8$ ; IR:  $\tilde{\nu} = 3345, 2920, 1654, 1589, 1362, 1280, 1141, 1030, 822$ ; UV-VIS (CH<sub>3</sub>CN + 0.5 % piperidine):  $\lambda_{\text{max}} (\epsilon) = 450$  nm (21300 l·mol<sup>-1</sup>·cm<sup>-1</sup>); HRMS (ESI):  $m/z$  calcd for C<sub>19</sub>H<sub>23</sub>N<sub>4</sub>O<sub>4</sub>: 371.1714 [M+H]<sup>+</sup>; found: 371.1718.

*N*-(5'-Methoxy-2'-((4''-morpholinophenyl)diazenyl)phenyl)succinamic acid **5c**

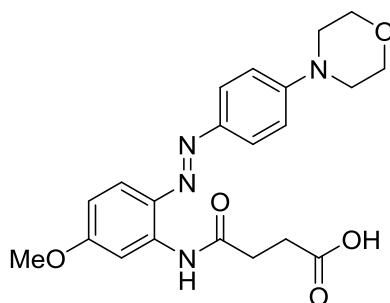

Standard Procedure **C** with ester **30c** (25 mg, 0.06 mmol, 1.0 equiv.) gave carboxylic acid **5c** (18 mg, 69 %) as a yellow solid after purification by preparative HPLC (H<sub>2</sub>O/CH<sub>3</sub>CN, 70:30 → 0:100). *R<sub>f</sub>* = 0.22 (CH<sub>2</sub>Cl<sub>2</sub>/MeOH, 8:2); m.p. 207 °C; <sup>1</sup>H-NMR (300 MHz, DMSO-*d*<sub>6</sub>): δ = 10.23 (s, 1 H), 8.02 (d, *J* = 2.6 Hz, 1 H), 7.90 (d, *J* = 8.9 Hz, 2 H), 7.70 (d, *J* = 9.0 Hz, 1 H), 7.09 (d, *J* = 9.0 Hz, 2 H), 6.76 (dd, *J* = 2.6, 9.0 Hz, 1 H), 3.82 (s, 3 H), 3.79 - 3.72 (m, 4 H), 3.30 - 3.27 (m, 4 H), 2.76 (t, *J* = 6.2 Hz, 2 H), 2.56 (t, *J* = 6.8 Hz, 2 H); <sup>13</sup>C-NMR (101 MHz, DMSO-*d*<sub>6</sub>): δ = 173.8, 170.7, 161.5, 152.7, 144.6, 137.6, 134.5, 124.5, 118.8, 114.0, 109.8, 105.3, 65.9, 55.5, 47.2, 31.7, 28.9; IR:  $\tilde{\nu}$  = 3375, 2970, 1701, 1589, 1234, 1111, 1038, 918, 818; UV-VIS (CH<sub>3</sub>CN + 0.5 % piperidine):  $\lambda_{max}$  ( $\epsilon$ ) = 414 nm (28000 l·mol<sup>-1</sup>·cm<sup>-1</sup>); HRMS (ESI): *m/z* calcd for C<sub>21</sub>H<sub>25</sub>N<sub>4</sub>O<sub>5</sub>: 413.1819 [M+H]<sup>+</sup>; found: 413.1825.

*N*-(5'-Methoxy-2'-((4''-(4'''-methylpiperazin-1'''-yl)phenyl)diazenyl)phenyl)succinamic acid **5d**

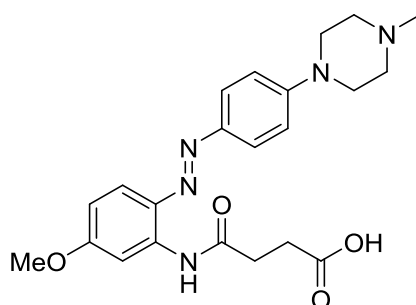

Standard Procedure **C** with ester **30d** (25 mg, 0.06 mmol, 1.0 equiv.) gave carboxylic acid **5d** (13 mg, 38 %) as a yellow solid after purification by preparative HPLC (H<sub>2</sub>O/CH<sub>3</sub>CN, 70:30 → 0:100). *R<sub>f</sub>* = 0.12 (CH<sub>2</sub>Cl<sub>2</sub>/MeOH, 8:2); m.p. 160 °C; <sup>1</sup>H-NMR (300 MHz, DMSO-*d*<sub>6</sub>): δ = 10.26 (s, 1 H), 8.03 (d, *J* = 2.6 Hz, 1 H), 7.88 (d, *J* = 8.9 Hz, 2 H), 7.70 (d, *J* = 9.0 Hz, 1 H), 7.07 (d, *J* = 9.0 Hz, 2 H), 6.75 (dd, *J* = 2.7, 9.0 Hz, 1 H), 3.81 (s, 3 H), 3.40 - 3.27 (m, 4 H), 2.75 (t, *J* = 6.6 Hz, 2 H), 2.56 (t, *J* = 6.9 Hz, 2 H), 2.48 - 2.41 (m, 4 H), 2.23 (s, 3 H); <sup>13</sup>C-NMR (101 MHz, DMSO-*d*<sub>6</sub>): δ = 173.9, 170.8, 161.4, 152.6, 144.3, 137.5, 134.5, 124.6, 118.7, 114.1, 109.7, 105.3, 55.5, 54.3, 46.9, 45.7, 31.8, 29.0; IR:  $\tilde{\nu}$  = 3368, 2967, 2839, 1682, 1585, 1508, 1285, 1238, 1150, 1033, 829; UV-VIS (CH<sub>3</sub>CN + 0.5 % piperidine):  $\lambda_{max}$  ( $\epsilon$ ) = 417 nm (19300 l·mol<sup>-1</sup>·cm<sup>-1</sup>); HRMS (ESI): *m/z* calcd for C<sub>22</sub>H<sub>28</sub>N<sub>5</sub>O<sub>4</sub>: 426.2136 [M+H]<sup>+</sup>; found: 426.2139.

*N*-(5'-Methoxy-2'-((3'',4'',5''-trimethoxyphenyl)diazenyl)phenyl)succinamic acid **6**

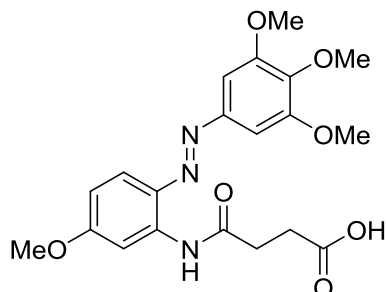

Standard Procedure **B** with azobenzene **36b** (100 mg, 0.26 mmol, 1.0 equiv.) and MeI (32.3  $\mu$ L, 0.52 mmol, 2.0 equiv.) gave crude azobenzene **37d** (99 mg) after evaporation of the solvent. The crude material was directly converted according to Standard Procedure **C** to give carboxylic acid **6** (77 mg, 71 %) as a yellow solid after purification by silica-gel chromatography (EtOAc/petroleum ether, 3:7 + 0.5 % formic acid).  $R_f$  = 0.19 (EtOAc/petroleum ether, 3:7 + 0.5 % formic acid); m.p. 165 °C;  $^1\text{H-NMR}$  (300 MHz, DMSO- $d_6$ ):  $\delta$  = 8.02 (d,  $J$  = 2.7 Hz, 1 H), 7.75 (d,  $J$  = 9.1 Hz, 1 H), 7.38 (s, 2 H), 6.79 (dd,  $J$  = 2.8, 9.1 Hz, 1 H), 3.91 (s, 6 H), 3.84 (s, 3 H), 3.75 (s, 3 H), 2.75 (t,  $J$  = 6.6 Hz, 2 H), 2.56 (t,  $J$  = 6.6 Hz, 2 H);  $^{13}\text{C-NMR}$  (101 MHz, DMSO- $d_6$ ):  $\delta$  = 174.4, 171.5, 163.0, 153.7, 148.6, 140.2, 139.3, 134.9, 118.5, 110.6, 106.1, 101.1, 60.7, 56.5, 56.1, 32.3, 29.7; IR:  $\tilde{\nu}$  = 3291, 2940, 2361, 1732, 1597, 1458, 1231, 1119, 1006, 821; UV-VIS (CH<sub>3</sub>CN + 0.5 % piperidine):  $\lambda_{max}$  ( $\epsilon$ ) = 393 nm (20600 l $\cdot$ mol<sup>-1</sup> $\cdot$ cm<sup>-1</sup>); HRMS (ESI):  $m/z$  calcd for C<sub>20</sub>H<sub>24</sub>N<sub>3</sub>O<sub>7</sub>: 418.1609 [M+H]<sup>+</sup>; found: 418.1617.

Ethyl-2-(3'-bromo-4'-((3'',4'',5''-trimethoxyphenyl)diazenyl)phenoxy)acetate **7a**

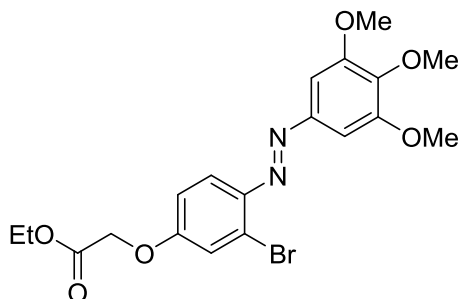

Standard Procedure **B** with azobenzene **41a** (453 mg, 1.24 mmol, 1.0 equiv.) and ethyl bromoacetate (0.55 mL, 4.94 mmol, 4.0 equiv.) gave azobenzene **7a** (471 mg, 84 %) as an orange solid after silica-gel chromatography (EtOAc/petroleum ether, 1:4  $\rightarrow$  1:2).  $R_f$  = 0.57

(EtOAc/petroleum ether, 1:2); m.p. 93 °C; <sup>1</sup>H-NMR (250 MHz, CDCl<sub>3</sub>): δ = 7.75 (d, *J* = 9.0 Hz, 1 H), 7.30 (d, *J* = 3.1 Hz, 3 H), 6.98 (dd, *J* = 2.7, 9.0 Hz, 1 H), 4.71 (s, 2 H), 4.33 (q, *J* = 7.1 Hz, 2 H), 3.99 (s, 6 H), 3.96 (s, 3 H), 1.35 (t, *J* = 7.1 Hz, 3 H); <sup>13</sup>C-NMR (63 MHz, CDCl<sub>3</sub>): δ = 168.0, 160.0, 153.5, 148.6, 144.2, 140.8, 127.4, 118.9, 118.6, 114.8, 100.7, 65.5, 61.7, 61.0, 56.1, 14.1; IR:  $\tilde{\nu}$  = 2982, 2839, 1763, 1589, 1416, 1200, 1126, 1076, 991, 841; UV-VIS (CH<sub>3</sub>CN + 0.5 % piperidine):  $\lambda_{max}$  ( $\epsilon$ ) = 369 nm (23000 l·mol<sup>-1</sup>·cm<sup>-1</sup>); HRMS (ESI): *m/z* calcd for C<sub>19</sub>H<sub>22</sub>BrN<sub>2</sub>O<sub>6</sub>: 453.0656/455.0635 [M+H]<sup>+</sup>; found: 453.0660/455.0639.

Ethyl-2-(3'-hydroxy-4'-((3'',4'',5''-trimethoxyphenyl)diazenyl)phenoxy)acetate **7b**

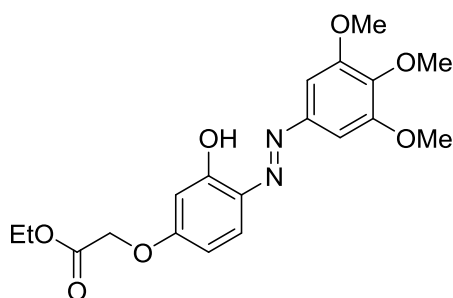

Standard Procedure **B** with azobenzene **41b** (115 mg, 0.38 mmol, 1.0 equiv.) and ethyl bromoacetate (42  $\mu$ L, 0.38 mmol, 1.0 equiv.) gave azobenzene **7b** (110 mg, 75 %) as an orange solid after purification by silica-gel chromatography (EtOAc/petroleum ether, 1:4  $\rightarrow$  1:2). *R<sub>f</sub>* = 0.64 (EtOAc/petroleum ether, 1:2); m.p. 121 °C; <sup>1</sup>H-NMR (300 MHz, CDCl<sub>3</sub>): δ = 13.57 (br s, 1 H), 7.82 (d, *J* = 8.8 Hz, 1 H), 7.11 (s, 2 H), 6.66 (dd, *J* = 2.7, 8.9 Hz, 1 H), 6.45 (d, *J* = 2.7 Hz, 1 H), 4.68 (s, 2 H), 4.30 (q, *J* = 7.1 Hz, 2 H), 3.96 (s, 6 H), 3.93 (s, 3 H), 1.32 (t, *J* = 7.1 Hz, 3 H); <sup>13</sup>C-NMR (101 MHz, CDCl<sub>3</sub>): δ = 168.1, 161.6, 155.7, 153.8, 146.1, 140.2, 134.6, 133.2, 108.2, 102.3, 99.2, 65.3, 61.6, 61.1, 56.3, 14.2; IR:  $\tilde{\nu}$  = 2940, 2639, 1724, 1597, 1423, 1280, 1219, 1114, 1006, 856, 825, 795; UV-VIS (CH<sub>3</sub>CN + 0.5 % piperidine):  $\lambda_{max}$  ( $\epsilon$ ) = 390 nm (27300 l·mol<sup>-1</sup>·cm<sup>-1</sup>); HRMS (ESI): *m/z* calcd for C<sub>19</sub>H<sub>23</sub>N<sub>2</sub>O<sub>7</sub>: 391.1500 [M+H]<sup>+</sup>; found: 391.1503.

Ethyl-2-((1'-((3'',4'',5''-trimethoxyphenyl)diazenyl)naphth-2'-yl)oxy)acetate **8**



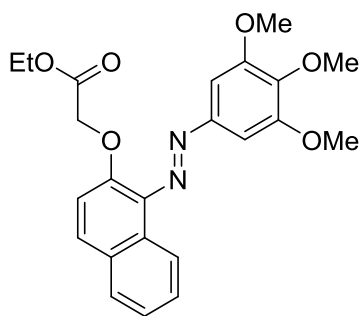

Standard Procedure **B** with azobenzene **49** (502 mg, 1.48 mmol, 1.0 equiv.) and ethyl bromoacetate (0.66 mL, 5.92 mmol, 4.0 equiv.) gave azobenzene **8** (449 mg, 71 %) as an orange solid after silica-gel chromatography (EtOAc/petroleum ether, 1:4  $\rightarrow$  1:2).  $R_f$  = 0.30 (EtOAc/petroleum ether, 1:4); m.p. 126 °C;  $^1\text{H-NMR}$  (300 MHz,  $\text{CDCl}_3$ ):  $\delta$  = 8.33 (d,  $J$  = 8.6 Hz, 1 H), 7.85 (d,  $J$  = 8.7 Hz, 2 H), 7.54 (ddd,  $J$  = 1.4, 6.8, 8.4 Hz, 1 H), 7.47 (ddd,  $J$  = 1.3, 6.7, 8.1 Hz, 1 H), 7.37 (s, 2 H), 7.36 (d,  $J$  = 8.8 Hz, 1 H), 4.79 (s, 2 H), 4.23 (q,  $J$  = 7.1 Hz, 2 H), 4.00 (s, 6 H), 3.97 (s, 3 H), 1.25 (t,  $J$  = 7.1 Hz, 3 H);  $^{13}\text{C-NMR}$  (75 MHz,  $\text{CDCl}_3$ ):  $\delta$  = 168.8, 153.6, 149.3, 146.8, 140.8, 137.8, 130.6, 130.2, 128.2, 127.9, 127.7, 125.1, 123.4, 117.6, 100.4, 68.7, 61.3, 61.1, 56.3, 14.1; IR:  $\tilde{\nu}$  = 2940, 2835, 1755, 1593, 1415, 1311, 1199, 1103, 991, 810; UV-VIS ( $\text{CH}_3\text{CN}$  + 0.5 % piperidine):  $\lambda_{\text{max}}$  ( $\epsilon$ ) = 370 nm (26800  $\text{l}\cdot\text{mol}^{-1}\cdot\text{cm}^{-1}$ ); HRMS (ESI):  $m/z$  calcd for  $\text{C}_{23}\text{H}_{25}\text{N}_2\text{O}_6$ : 425.1707  $[\text{M}+\text{H}]^+$ ; found: 425.1713.

#### Methyl-2-(4'-((3'',4''-dimethoxyphenyl)diazenyl)phenoxy)acetate **9a**

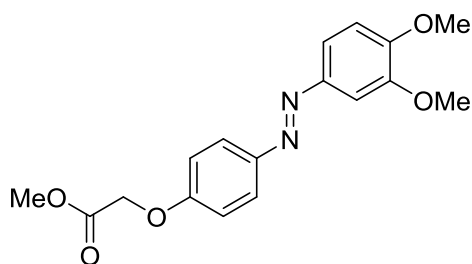

Standard Procedure **B** with azobenzene **25a** (100 mg, 0.32 mmol, 1.0 equiv.), and MeI (94 mg, 0.66 mmol, 2.1 equiv.) gave azobenzene **9a** (83 mg, 80 %) as a yellow solid after purification by silica-gel chromatography (EtOAc/petroleum ether, 1:2).  $R_f$  = 0.62 (EtOAc/petroleum ether, 1:2); m.p. 141 °C;  $^1\text{H-NMR}$  (250 MHz,  $\text{CDCl}_3$ ):  $\delta$  = 7.92 (d,  $J$  = 9.0 Hz, 2 H), 7.62 (dd,  $J$  = 2.2, 8.4 Hz, 1 H), 7.52 (d,  $J$  = 2.0 Hz, 1 H), 7.09 - 6.98 (m, 3 H), 4.75 (s, 2 H), 4.01 (s, 3 H), 4.00 (s, 3 H), 3.86 (s, 3 H);  $^{13}\text{C-NMR}$  (63 MHz,  $\text{CDCl}_3$ ):  $\delta$  = 169.9, 160.5, 152.5, 150.5, 148.5, 147.8, 125.3, 121.4, 115.8, 111.3, 102.8, 66.3, 57.0, 56.9, 53.3; IR:  $\tilde{\nu}$  = 2959, 2612, 1751, 1578, 1497, 1439, 1188, 1111, 1018, 856, 817; UV-VIS ( $\text{CH}_3\text{CN}$  +

0.5 % piperidine):  $\lambda_{max}$  ( $\epsilon$ ) = 376 nm (19000 l·mol<sup>-1</sup>·cm<sup>-1</sup>); HRMS (ESI):  $m/z$  calcd for C<sub>17</sub>H<sub>19</sub>N<sub>2</sub>O<sub>5</sub>: 331.1288 [M+H]<sup>+</sup>; found: 311.1295.

Methyl-2-(4'-((3'',4'',5''-trimethoxyphenyl)diazenyl)phenoxy)acetate **9b**

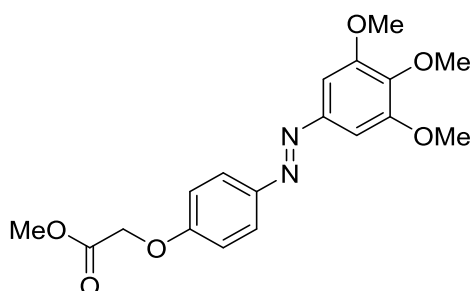

Standard Procedure **B** with azobenzene **25b** (222 mg, 0.64 mmol, 1.0 equiv.), and MeI (188 mg, 1.32 mmol, 2.1 equiv.) gave azobenzene **9b** (206 mg, 89 %) as a yellow solid after purification by silica-gel chromatography (EtOAc/petroleum ether, 1:2).  $R_f$  = 0.62 (EtOAc/petroleum ether, 1:2); m.p. 51 °C; <sup>1</sup>H-NMR (400 MHz, CDCl<sub>3</sub>):  $\delta$  = 7.92 (d,  $J$  = 8.5 Hz, 2 H), 7.23 (s, 2 H), 7.04 (d,  $J$  = 8.8 Hz, 2 H), 4.72 (s, 2 H), 4.31 (q,  $J$  = 7.2 Hz, 2 H), 3.98 (s, 6 H), 3.95 (s, 3 H), 1.33 (t,  $J$  = 7.9 Hz, 3 H); <sup>13</sup>C-NMR (101 MHz, CDCl<sub>3</sub>):  $\delta$  = 168.4, 159.9, 153.5, 148.5, 147.4, 140.2, 124.5, 114.9, 100.1, 65.4, 61.5, 61.0, 56.1, 14.1; IR:  $\tilde{\nu}$  = 2940, 2913, 2839, 1759, 1578, 1215, 1123, 1003, 845, 829; UV-VIS (CH<sub>3</sub>CN + 0.5 % piperidine):  $\lambda_{max}$  ( $\epsilon$ ) = 360 nm (22100 l·mol<sup>-1</sup>·cm<sup>-1</sup>); HRMS (ESI):  $m/z$  calcd for C<sub>19</sub>H<sub>23</sub>N<sub>2</sub>O<sub>6</sub>: 375.1551 [M+H]<sup>+</sup>; found: 375.1563.

Methyl-2-(4'-((4''-(2'''-hydroxyethoxy)-3'',5''-dimethoxyphenyl)diazenyl)phenoxy)acetate **9c**

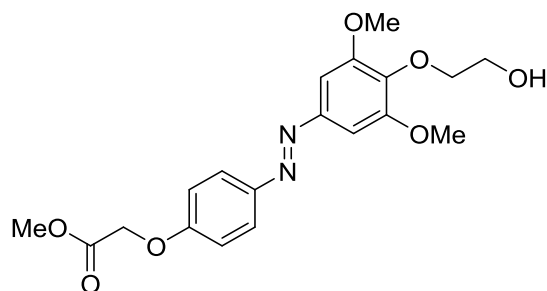

Standard Procedure **B** with azobenzene **25b** (100 mg, 0.28 mmol, 1.0 equiv.) and 2-bromoethanol (59  $\mu\text{L}$ , 0.83 mmol, 1.0 equiv.) gave azobenzene **9c** (82 mg, 76 %) as a yellow solid after purification by silica-gel chromatography (EtOAc/petroleum ether, 1:1).  $R_f = 0.38$  (EtOAc/petroleum ether, 1:1); m.p. 91  $^\circ\text{C}$ ;  $^1\text{H-NMR}$  (250 MHz,  $\text{CDCl}_3$ ):  $\delta = 7.91$  (d,  $J = 8.6$  Hz, 2 H), 7.24 (s, 2 H), 7.03 (d,  $J = 8.6$  Hz, 2 H), 4.73 (s, 2 H), 4.22 (t,  $J = 3.9$  Hz, 2 H), 3.98 (s, 6 H), 3.84 (s, 3 H), 3.76 (t,  $J = 4.0$  Hz, 2 H);  $^{13}\text{C-NMR}$  (63 MHz,  $\text{CDCl}_3$ ):  $\delta = 169.8, 160.9, 154.5, 149.7, 148.3, 139.3, 125.6, 115.8, 101.0, 76.5, 66.3, 62.3, 57.2, 53.3$ ; IR:  $\tilde{\nu} = 3510, 2951, 2322, 1751, 1582, 1497, 1207, 1126, 1072, 841$ ; UV-VIS ( $\text{CH}_3\text{CN} + 0.5\%$  piperidine):  $\lambda_{\text{max}} (\epsilon) = 360$  nm ( $19800 \text{ l}\cdot\text{mol}^{-1}\cdot\text{cm}^{-1}$ ); HRMS (ESI):  $m/z$  calcd for  $\text{C}_{19}\text{H}_{23}\text{N}_2\text{O}_7$ : 391.1500  $[\text{M}+\text{H}]^+$ ; found: 391.1503.

Methyl-2-(4'-((4''-(2'''-bromoethoxy)-3'',5''-dimethoxyphenyl)diazenyl)phenoxy)acetate **9d**

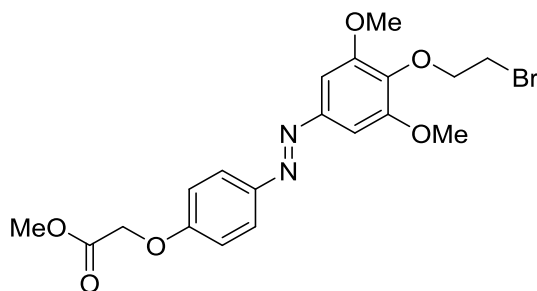

Standard Procedure **B** with azobenzene **25b** (100 mg, 0.28 mmol, 1.0 equiv.) and 1,2-dibromoethane (249  $\mu\text{L}$ , 2.89 mmol, 10.0 equiv.) in anhydrous acetone (20 mL) gave azobenzene **9d** (119 mg, 91 %) as a chartreuse solid after purification by silica-gel chromatography (EtOAc/petroleum ether, 1:4).  $R_f = 0.57$  (EtOAc/petroleum ether, 1:4); m.p. 179  $^\circ\text{C}$ ;  $^1\text{H-NMR}$  (300 MHz,  $\text{CDCl}_3$ ):  $\delta = 7.90$  (d,  $J = 8.7$  Hz, 2 H), 7.21 (s, 2 H), 7.03 (d,  $J = 8.8$  Hz, 2 H), 4.73 (s, 2 H), 4.34 (t,  $J = 7.0$  Hz, 2 H), 3.96 (s, 6 H), 3.84 (s, 3 H), 3.64 (t,  $J = 7.0$  Hz, 2 H);  $^{13}\text{C-NMR}$  (75 MHz,  $\text{CDCl}_3$ ):  $\delta = 168.9, 160.0, 153.5, 148.9, 147.5, 138.4, 124.7, 114.9, 100.0, 72.7, 65.3, 56.2, 52.4, 29.6$ ; IR:  $\tilde{\nu} = 2062, 2835, 1759, 1597, 1501, 1439, 1408, 1211, 1130, 1076, 991, 810$ ; UV-VIS ( $\text{CH}_3\text{CN} + 0.5\%$  piperidine):  $\lambda_{\text{max}} (\epsilon) = 360$  nm ( $27200 \text{ l}\cdot\text{mol}^{-1}\cdot\text{cm}^{-1}$ ); HRMS (ESI):  $m/z$  calcd for  $\text{C}_{19}\text{H}_{22}\text{BrN}_2\text{O}_6$ : 453.0656/455.0638  $[\text{M}+\text{H}]^+$ ; found: 453.0658/455.0640.

Methyl-2-(4'-((3'',5''-dimethoxy-4''-(2'''-(4''''-methylpiperazin-1''''-yl)ethoxy)phenyl)diazenyl)-phenoxy)acetate **9e**

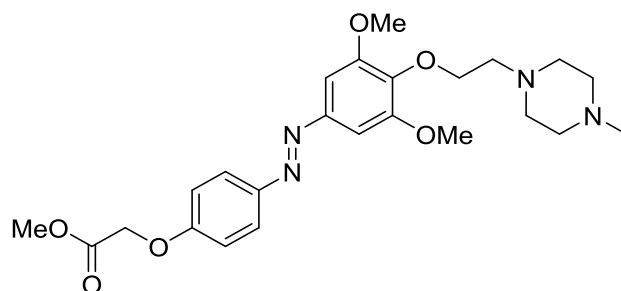

A microwave vial charged with azobenzene **9d** (60 mg, 0.13 mmol, 1.0 equiv.), 1-methylpiperazine (19  $\mu$ L, 0.17 mmol, 1.3 equiv.),  $K_2CO_3$  (24 mg, 0.17 mmol, 1.3 equiv.), and  $CH_3CN$  (4 mL) was heated to 140  $^{\circ}C$  for 10 min. in a microwave. After cooling the solvent was removed under reduced pressure, and the residue was redissolved in  $CHCl_3$  (30 mL). The organic phase was washed with water (20 mL), and brine (20 mL), dried with  $Na_2SO_4$ , filtered, and concentrated under reduced pressure. Azobenzene **9e** (45 mg, 72 %) was obtained as an orange oil without further purification.  $R_f = 0.31$  ( $CH_2Cl_2/MeOH$ , 9:1);  $^1H$ -NMR (300 MHz,  $CDCl_3$ ):  $\delta = 7.87$  (d,  $J = 8.9$  Hz, 2 H), 7.18 (s, 2 H), 7.00 (d,  $J = 8.9$  Hz, 2 H), 4.70 (s, 2 H), 4.16 (t,  $J = 5.8$  Hz, 2 H), 3.91 (s, 6 H), 3.81 (s, 3 H), 2.79 (t,  $J = 6.1$  Hz, 2 H), 2.63 (br s, 4 H), 2.49 (br s, 4 H), 2.27 (s, 3 H);  $^{13}C$ -NMR (75 MHz,  $CDCl_3$ ):  $\delta = 168.8$ , 159.8, 153.6, 148.5, 147.4, 139.3, 124.5, 114.8, 100.0, 70.6, 65.3, 57.9, 56.0, 55.0, 53.4, 52.3, 46.0; IR:  $\tilde{\nu} = 2940$ , 2797, 2361, 1740, 1597, 1497, 1204, 1123, 1003, 841; UV-VIS ( $CH_3CN + 0.5\%$  piperidine):  $\lambda_{max} (\epsilon) = 362$  nm (21600  $l \cdot mol^{-1} \cdot cm^{-1}$ ); HRMS (ESI):  $m/z$  calcd for  $C_{24}H_{33}N_4O_6$ : 473.2395  $[M+H]^+$ ; found: 473.2398.

Ethyl-2-(2'-(*tert*-butyldimethylsilyl)oxy-4-((3'',4'',5''-trimethoxyphenyl)diazenyl)phenoxy)acetate **10a**

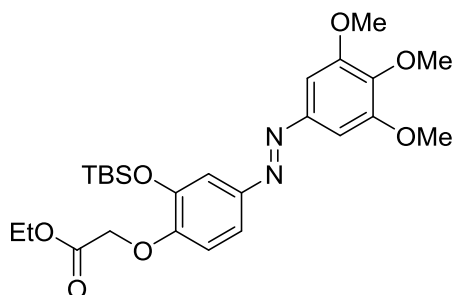

A solution of phenol **44a** (100 mg, 0.24 mmol, 1.0 equiv.) in dry THF (10 mL) was cooled to -20  $^{\circ}C$  under an atmosphere of argon. Solid NaH (8.6 mg, 0.36 mmol, 1.5 equiv.) was added and stirred for 10 min followed by addition of ethyl bromoacetate (133  $\mu$ L, 1.19 mmol,

5.0 equiv.). The reaction mixture was stirred at 0°C for 1.5 h. After stirring for additional 1 h at 20°C the pH was adjusted to 7 with phosphate buffer, and CHCl<sub>3</sub> (20 mL) was added. The aqueous layer was separated and extracted with CHCl<sub>3</sub> (3 × 10 mL). The combined organic extracts were dried with Na<sub>2</sub>SO<sub>4</sub>, filtered, and concentrated under reduced pressure. Purification by silica-gel chromatography (EtOAc/petroleum ether, 1:4) provided azobenzene **10a** (75 mg, 62 %) as a yellow solid.  $R_f = 0.42$  (EtOAc/petroleum ether, 1:4); m.p. 101 °C; <sup>1</sup>H-NMR (400 MHz, CDCl<sub>3</sub>):  $\delta = 7.54$  (dd,  $J = 2.3, 8.5$  Hz, 1 H), 7.47 (d,  $J = 2.3$  Hz, 1 H), 7.21 (s, 2 H), 6.90 (d,  $J = 8.5$  Hz, 1 H), 4.70 (s, 2 H), 4.29 (q,  $J = 7.1$  Hz, 2 H), 3.98 (s, 6 H), 3.93 (s, 3 H), 1.31 (t,  $J = 7.2$  Hz, 3 H), 1.09 - 1.03 (m, 9 H), 0.26 (s, 6 H); <sup>13</sup>C-NMR (101 MHz, CDCl<sub>3</sub>):  $\delta = 168.4, 153.5, 151.9, 148.5, 147.8, 145.9, 140.2, 118.6, 114.2, 113.3, 100.2, 66.1, 61.4, 61.0, 56.2, 25.7, 18.4, 14.2, -4.6$ ; IR:  $\tilde{\nu} = 2932, 1759, 1593, 1493, 1416, 1277, 1192, 1122, 837, 783$ ; UV-VIS (CH<sub>3</sub>CN + 0.5 % piperidine):  $\lambda_{max} (\epsilon) = 369$  nm (21300 l·mol<sup>-1</sup>·cm<sup>-1</sup>); HRMS (ESI):  $m/z$  calcd for C<sub>25</sub>H<sub>37</sub>N<sub>2</sub>O<sub>7</sub>Si: 505.2365 [M+H]<sup>+</sup>; found: 505.2359.

Ethyl-2-(2'-bromo-4'-((3'',4'',5''-trimethoxyphenyl)diazenyl)phenoxy)acetate **10b**

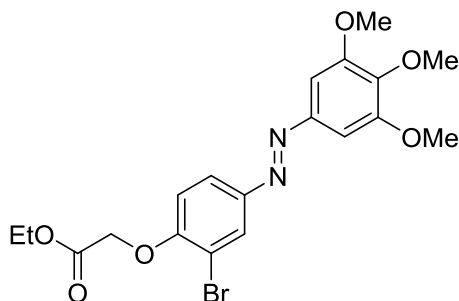

Standard Procedure **B** with azobenzene **44b** (305 mg, 0.83 mmol, 1.0 equiv.), and ethyl bromoacetate (0.37 mL, 3.33 mmol, 4.0 equiv.) gave azobenzene **10b** (338 mg, 89 %) as a yellow solid after silica-gel chromatography (EtOAc/petroleum ether, 1:4 → 1:2).  $R_f = 0.60$  (EtOAc/petroleum ether, 1:2); m.p. 112 °C; <sup>1</sup>H-NMR (250 MHz, CDCl<sub>3</sub>):  $\delta = 8.19$  (d,  $J = 2.4$  Hz, 1 H), 7.88 (dd,  $J = 2.4, 8.8$  Hz, 1 H), 7.23 (s, 2 H), 6.92 (d,  $J = 8.8$  Hz, 1 H), 4.80 (s, 2 H), 4.31 (q,  $J = 7.1$  Hz, 2 H), 3.97 (s, 6 H), 3.94 (s, 3 H), 1.32 (t,  $J = 7.1$  Hz, 3 H); <sup>13</sup>C-NMR (63 MHz, CDCl<sub>3</sub>):  $\delta = 167.9, 156.2, 153.5, 148.2, 147.6, 140.7, 126.5, 125.0, 113.2, 112.7, 100.4, 66.3, 61.7, 61.0, 56.2, 14.1$ ; IR:  $\tilde{\nu} = 2943, 2832, 1763, 1593, 1485, 1411, 1200, 1119, 1011, 849$ ; UV-VIS (CH<sub>3</sub>CN + 0.5 % piperidine):  $\lambda_{max} (\epsilon) = 364$  nm (25700 l·mol<sup>-1</sup>·cm<sup>-1</sup>); HRMS (ESI):  $m/z$  calcd for C<sub>19</sub>H<sub>22</sub>BrN<sub>2</sub>O<sub>6</sub>: 453.0656/455.0635 [M+H]<sup>+</sup>; found: 453.0662/455.0642.

Ethyl-2-(2'-morpholino-4'-((3'',4'',5''-trimethoxyphenyl)diazenyl)phenoxy)acetate **10c**

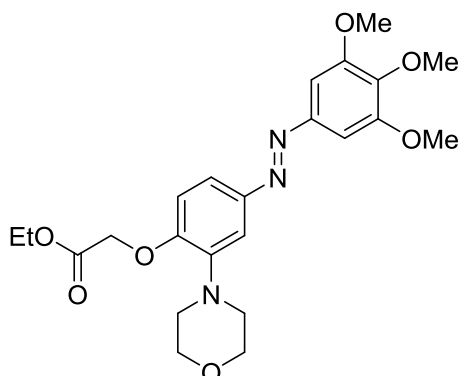

Standard Procedure **D** with azobenzene **10b** (30.0 mg, 0.66 mmol, 1.0 equiv.) and morpholine (13.1  $\mu$ L, 0.132 mmol, 2.0 equiv.) gave azobenzene **10c** (14.0 mg, 45 %) as an orange wax after silica-gel chromatography ( $\text{CH}_2\text{Cl}_2/\text{MeOH}$ , 9:1).  $R_f = 0.40$  ( $\text{CH}_2\text{Cl}_2/\text{MeOH}$ , 9:1);  $^1\text{H-NMR}$  (300 MHz,  $\text{CDCl}_3$ ):  $\delta = 7.62$  (dd,  $J = 2.3, 8.5$  Hz, 1 H), 7.57 (d,  $J = 2.2$  Hz, 1 H), 7.23 (s, 2 H), 6.90 (d,  $J = 8.6$  Hz, 1 H), 4.78 (s, 2 H), 4.31 (q,  $J = 7.1$  Hz, 2 H), 3.98 (s, 6 H), 3.94 (s, 3 H), 3.99 - 3.92 (m, 4 H), 3.25 (t,  $J = 4.4$  Hz, 4 H), 1.33 (t,  $J = 7.2$  Hz, 3 H);  $^{13}\text{C-NMR}$  (75MHz,  $\text{CDCl}_3$ ):  $\delta = 168.3, 153.5, 152.6, 148.5, 147.7, 142.2, 140.3, 120.1, 112.4, 111.2, 100.1, 67.2, 65.6, 61.6, 61.0, 56.2, 51.1, 14.2$ ; IR:  $\tilde{\nu} = 3460, 2963, 2842, 1752, 1581, 1345, 1241, 1163, 911, 840$ ; UV-VIS ( $\text{CH}_3\text{CN} + 0.5\%$  piperidine):  $\lambda_{\text{max}}$  ( $\epsilon$ ) = 368 nm (22000  $\text{l}\cdot\text{mol}^{-1}\cdot\text{cm}^{-1}$ ); HRMS (ESI):  $m/z$  calcd for  $\text{C}_{23}\text{H}_{30}\text{N}_3\text{O}_7$ : 460.2079  $[\text{M}+\text{H}]^+$ ; found: 460.2090.

2-(2'-Hydroxy-4'-((3'',4'',5''-trimethoxyphenyl)diazenyl)phenoxy)acetic acid **10d**

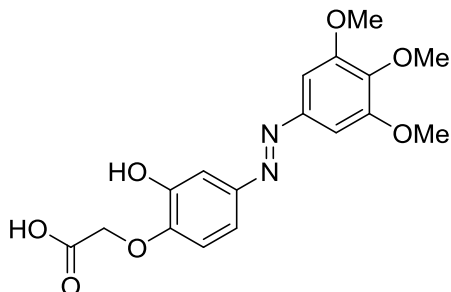

Standard Procedure **C** with ester **10a** (60 mg, 0.12 mmol, 1.0 equiv.) gave carboxylic acid **10d** (40 mg, 94 %) as an orange solid after purification by silica-gel chromatography ( $\text{EtOAc}/\text{petroleum ether}$ , 3:7  $\rightarrow$   $\text{EtOAc} + 0.5\%$  formic acid).  $R_f = 0.15$  ( $\text{EtOAc}/\text{petroleum ether}$ , 3:7 + 0.5 % formic acid); m.p. 132  $^\circ\text{C}$ ;  $^1\text{H-NMR}$  (400 MHz,  $\text{DMSO}-d_6$ ):  $\delta =$  (br s, 1 H),

7.41 (dd,  $J = 2.3, 8.5$  Hz, 1 H), 7.34 (d,  $J = 2.0$  Hz, 1 H), 7.18 (s, 2 H), 7.00 (d,  $J = 8.5$  Hz, 1 H), 4.77 (s, 2 H), 3.88 (s, 6 H), 3.75 (s, 3 H);  $^{13}\text{C-NMR}$  (101 MHz,  $\text{DMSO-}d_6$ ):  $\delta = 170.1, 153.3, 149.5, 147.8, 147.5, 146.7, 139.8, 118.3, 113.4, 106.2, 99.9, 65.5, 60.2, 56.0$ ; IR:  $\tilde{\nu} = 3507, 3005, 2360, 1748, 1597, 1493, 1207, 1114, 995, 806$ ; UV-VIS ( $\text{CH}_3\text{CN} + 0.5\%$  piperidine):  $\lambda_{\text{max}} (\epsilon) = 367$  nm ( $21100 \text{ l}\cdot\text{mol}^{-1}\cdot\text{cm}^{-1}$ ); HRMS (ESI):  $m/z$  calcd for  $\text{C}_{17}\text{H}_{19}\text{N}_2\text{O}_7$ : 363.1187  $[\text{M}+\text{H}]^+$ ; found: 363.1194.

*N*-(2'-((3'',4''-Dimethoxyphenyl)diazenyl)-5'-methoxyphenyl)succinamic acid **11a**

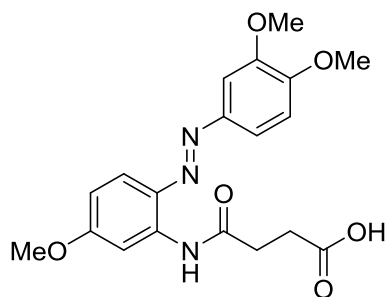

Standard Procedure C with ester **37a** (40.0 mg, 0.11 mmol, 1.0 equiv.) gave carboxylic acid **11a** (41 mg, 98 %) as a yellow solid after purification by silica-gel chromatography ( $\text{CH}_2\text{Cl}_2/\text{MeOH}$ , 98:2  $\rightarrow$  95:5).  $R_f = 0.13$  ( $\text{CH}_2\text{Cl}_2/\text{MeOH}$ , 95:5); m.p. 158 °C;  $^1\text{H-NMR}$  (300 MHz,  $\text{CDCl}_3$ ):  $\delta = 11.00$  (s, 1 H), 8.32 (d,  $J = 2.6$  Hz, 1 H), 7.85 (d,  $J = 9.0$  Hz, 1 H), 7.51 (dd,  $J = 2.3, 8.5$  Hz, 1 H), 7.47 (d,  $J = 2.1$  Hz, 1 H), 7.03 (d,  $J = 8.5$  Hz, 1 H), 6.76 (dd,  $J = 2.7, 9.0$  Hz, 1 H), 4.01 (s, 3 H), 4.01 (s, 3 H), 3.93 (s, 3 H), 2.91 - 2.79 (m, 4 H);  $^{13}\text{C-NMR}$  (101 MHz,  $\text{CDCl}_3$ ):  $\delta = 175.8, 170.3, 162.7, 151.6, 149.8, 146.6, 136.2, 133.3, 125.3, 119.4, 111.0, 110.6, 103.8, 102.0, 56.2, 56.0, 55.7, 32.5, 29.0$ ; IR:  $\tilde{\nu} = 2940, 2839, 2322, 1717, 1585, 1504, 1420, 1231, 1107, 1022, 856, 810$ ; UV-VIS ( $\text{CH}_3\text{CN} + 0.5\%$  piperidine):  $\lambda_{\text{max}} (\epsilon) = 395$  nm ( $24700 \text{ l}\cdot\text{mol}^{-1}\cdot\text{cm}^{-1}$ ); HRMS (ESI):  $m/z$  calcd for  $\text{C}_{19}\text{H}_{22}\text{N}_3\text{O}_6$ : 388.1503  $[\text{M}+\text{H}]^+$ ; found: 388.1512.

*N*-(2'-((3'',5''-Dimethoxy-4''-(2'''-(4''''-methylpiperazin-1''''-yl)ethoxy)phenyl)diazenyl)-5'-methoxyphenyl)succinamic acid **11b**

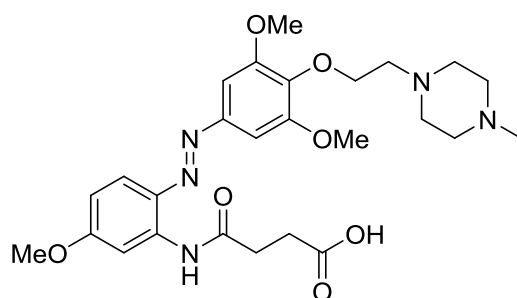

Standard Procedure **C** with ester **37b** (36 mg, 0.07 mmol, 1.0 equiv.) gave carboxylic acid **11c** (35 mg, 94 %) as an orange solid after purification by preparative HPLC (H<sub>2</sub>O/CH<sub>3</sub>CN, 90:10 → 0:100). *R<sub>f</sub>* = 0.24 (CH<sub>2</sub>Cl<sub>2</sub>/MeOH, 8:2); m.p. 208 °C; <sup>1</sup>H-NMR (500 MHz, DMSO-*d*<sub>6</sub>): δ = 10.37 (s, 1 H), 8.02 (d, *J* = 2.7 Hz, 1 H), 7.75 (d, *J* = 9.2 Hz, 1 H), 7.38 (s, 2 H), 6.79 (dd, *J* = 2.7, 9.2 Hz, 1 H), 4.04 (t, *J* = 6.0 Hz, 2 H), 3.90 (s, 6 H), 3.84 (s, 3 H), 2.75 (t, *J* = 6.6 Hz, 2 H), 2.64 (t, *J* = 6.0 Hz, 2 H), 2.56 (t, *J* = 6.6 Hz, 2 H), 2.46 (br. s, 4 H), 2.33 (br s, 4 H), 2.16 (s, 3 H); <sup>13</sup>C-NMR (126 MHz, DMSO-*d*<sub>6</sub>): δ = 174.0, 171.1, 162.6, 153.4, 148.1, 138.9, 138.8, 134.5, 118.1, 110.1, 105.6, 100.7, 70.5, 57.4, 56.1, 55.6, 54.6, 52.8, 45.6, 32.0, 29.3; IR:  $\tilde{\nu}$  = 3379, 2940, 2835, 1736, 1694, 1593, 1385, 1215, 1126, 1030, 845; UV-VIS (CH<sub>3</sub>CN + 0.5 % piperidine):  $\lambda_{max}$  ( $\epsilon$ ) = 393 nm (24100 l·mol<sup>-1</sup>·cm<sup>-1</sup>); HRMS (ESI): *m/z* calcd for C<sub>26</sub>H<sub>36</sub>N<sub>5</sub>O<sub>7</sub>: 530.2609 [M+H]<sup>+</sup>; found: 530.2613.

*N*-(4'-Methoxy-2'-((3'',4'',5''-trimethoxyphenyl)diazenyl)phenyl)succinamic acid **11c**

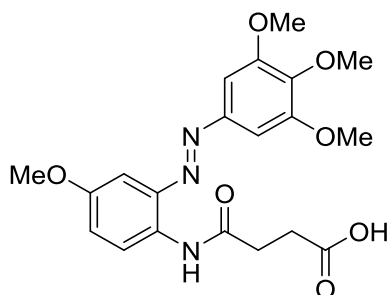

Standard Procedure **C** with ester **39** (80 mg, 0.19 mmol, 1.0 equiv.) gave carboxylic acid **11c** (58 mg, 75 %) as a yellow solid after purification by silica-gel chromatography (CH<sub>2</sub>Cl<sub>2</sub>/MeOH, 98:2 → 95:5). *R<sub>f</sub>* = 0.11 (CH<sub>2</sub>Cl<sub>2</sub>/MeOH, 95:5); m.p. 163 °C; <sup>1</sup>H-NMR (300 MHz, DMSO-*d*<sub>6</sub>): δ = 10.03 (br s, 1 H), 8.05 (d, *J* = 9.0 Hz, 1 H), 7.40 (s, 2 H), 7.20 (d, *J* = 3.0 Hz, 1 H), 7.10 (dd, *J* = 3.0, 9.0 Hz, 1 H), 3.88 (s, 6 H), 3.77 (s, 3 H), 3.74 (s, 3 H), 2.66 (t, *J* = 6.7 Hz, 2 H), 2.51 (t, *J* = 6.5 Hz, 2 H); <sup>13</sup>C-NMR (101 MHz, DMSO-*d*<sub>6</sub>): δ = 175.0, 170.9, 156.2, 153.7, 148.5, 142.3, 140.9, 131.8, 124.9, 119.7, 101.6, 98.9, 60.7, 56.5, 55.9, 29.8, 28.3; IR:  $\tilde{\nu}$  = 3310, 2936, 2832, 1721, 1655, 1531, 1404, 1304, 1215, 1007, 833;



UV-VIS (CH<sub>3</sub>CN + 0.5 % piperidine):  $\lambda_{max}$  ( $\epsilon$ ) = 393 nm (25500 l·mol<sup>-1</sup>·cm<sup>-1</sup>); HRMS (ESI):  $m/z$  calcd for C<sub>20</sub>H<sub>24</sub>N<sub>3</sub>O<sub>7</sub>: 418.1609 [M+H]<sup>+</sup>; found: 418.1620.

*N*-(2-Methoxy-5-((3',4',5'-trimethoxyphenyl)diazenyl)phenyl)succinamic acid **12**

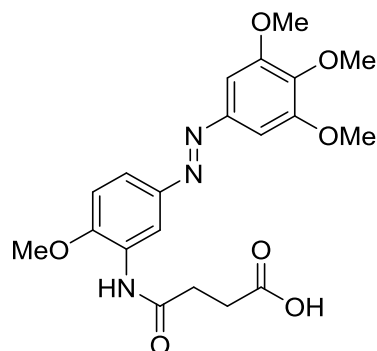

Azobenzene **34** (585 mg, 1.40 mmol, 1.0 equiv.) dissolved in a mixture of 1,4-dioxane and methanol (1:1, 10 mL) was treated with HCl (8.0 mL, 4 M in dioxan) and stirred at room temperature for 4 h. After evaporation of all solvents, K<sub>2</sub>CO<sub>3</sub> (2.17 g, 15.7 mmol, 11.2 equiv.) and succinic anhydride (631 mg, 6.31 mmol, 4.5 equiv.) were added followed by DMF (8.0 mL). The resulting mixture was stirred for 16 h at 85 °C. After cooling water (30 mL) and EtOAc (20 mL) were added and the pH was adjusted to 10 with sat. NaHCO<sub>3</sub>. The organic layer was discarded. The pH of the aqueous phase was adjusted to 3 with HCl (1 M), followed by extraction of the aqueous layer with EtOAc (3 × 150 mL). The combined organic extracts were dried (Na<sub>2</sub>SO<sub>4</sub>) and concentrated under reduced pressure. The residue was purified by silica-gel chromatography (EtOAc/petroleum ether, 3:7 + 0.5 % formic acid) to provide azobenzene **12** (317 mg, 54 %) as an orange solid.  $R_f$  = 0.20 (EtOAc/petroleum ether, 3:7 + 0.5 % formic acid); m.p. 88 °C; <sup>1</sup>H-NMR (300 MHz, DMSO-*d*<sub>6</sub>):  $\delta$  = 12.12 (br s, 1 H), 9.36 (s, 1 H), 8.62 (d,  $J$  = 2.1 Hz, 1 H), 7.71 (dd,  $J$  = 2.4, 8.7 Hz, 1 H), 7.24 (d,  $J$  = 8.9 Hz, 1 H), 7.22 (s, 2 H), 3.95 (s, 3 H), 3.89 (s, 6 H), 3.75 (s, 3 H), 2.69 (t,  $J$  = 6.9 Hz, 2 H), 2.57 - 2.52 (m, 2 H); <sup>13</sup>C-NMR (101 MHz, DMSO-*d*<sub>6</sub>):  $\delta$  = 174.4, 171.2, 153.8, 152.2, 148.3, 145.9, 140.2, 128.7, 122.1, 113.6, 111.5, 100.3, 60.7, 56.6, 56.4, 31.4, 29.3; IR:  $\tilde{\nu}$  = 3329, 2920, 2851, 1740, 1705, 1593, 1531, 1408, 1250, 1123, 991; UV-VIS (CH<sub>3</sub>CN + 0.5 % piperidine):  $\lambda_{max}$  ( $\epsilon$ ) = 373 nm (22600 l·mol<sup>-1</sup>·cm<sup>-1</sup>); HRMS (ESI):  $m/z$  calcd for C<sub>20</sub>H<sub>24</sub>N<sub>3</sub>O<sub>7</sub>: 418.1609 [M+H]<sup>+</sup>; found: 418.1610.

4-((4'-bromophenyl)diazenyl)phenol **15**

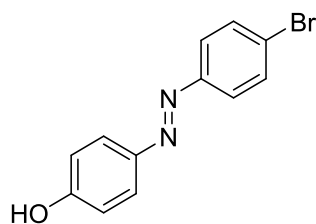

Standard Procedure **A1** with *p*-bromaniline (5.00 g, 29.1 mmol, 1.0 equiv.) and phenol (2.87 g, 30.5 mmol, 1.05 equiv.) gave azobenzene **15** (6.28 g, 78 %) as an ocher solid after recrystallisation (toluene/petroleum ether, 1:3).  $R_f = 0.40$  (EtOAc/petroleum ether, 1:4); m.p. 160 °C;  $^1\text{H-NMR}$  (300 MHz,  $\text{CDCl}_3$ ):  $\delta = 7.88$  (d,  $J = 8.8$  Hz, 2 H), 7.77 (d,  $J = 8.8$  Hz, 2 H), 7.63 (d,  $J = 8.8$  Hz, 2 H), 6.96 (d,  $J = 8.8$  Hz, 2 H), 5.19 (br s, 1 H);  $^{13}\text{C-NMR}$  (75 MHz,  $\text{CDCl}_3$ ):  $\delta = 158.4, 151.4, 147.0, 132.3, 125.1, 124.7, 124.1, 115.9$ ; IR:  $\tilde{\nu} = 3159, 2951, 2854, 1739, 1601, 1462, 1366, 1253, 837, 671$ ; UV-VIS ( $\text{CH}_3\text{CN} + 0.5\%$  piperidine):  $\lambda_{\text{max}} (\epsilon) = 350$  nm ( $23800 \text{ l}\cdot\text{mol}^{-1}\cdot\text{cm}^{-1}$ ); HRMS (ESI):  $m/z$  calcd for  $\text{C}_{12}\text{H}_{10}\text{BrN}_2\text{O}$ : 276.9971/278.9951  $[\text{M}+\text{H}]^+$ ; found: 276.9975/278.9954.

2-(4'-((4''-(dimethylamino)phenyl)diazenyl)phenoxy)acetic acid **16b**

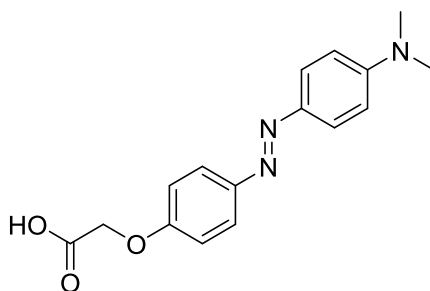

Standard Procedure **C** with ester **1b** (50.0 mg, 0.15 mmol, 1.0 equiv.) gave carboxylic acid **16b** (35.6 mg, 78 %) as an ocher solid after evaporation of the solvent.  $R_f = 0.19$  (MeOH); m.p. 279 °C;  $^1\text{H-NMR}$  (500 MHz,  $\text{CD}_3\text{OD}$ ):  $\delta = 7.77$  (t,  $J = 7.6$  Hz, 4 H), 7.03 (d,  $J = 8.2$  Hz, 2 H), 6.82 (d,  $J = 8.5$  Hz, 2 H), 4.45 (s, 2 H), 3.07 (s, 6 H);  $^{13}\text{C-NMR}$  (126 MHz,  $\text{CD}_3\text{OD}$ ):  $\delta = 176.3, 161.8, 154.0, 148.8, 145.0, 125.6, 124.7, 116.1, 112.9, 68.7, 40.6$ ; IR:  $\tilde{\nu} = 3460, 2943, 2789, 1740, 1597, 1420, 1366, 1231, 1034, 826$ ; UV-VIS ( $\text{CH}_3\text{CN} + 0.5\%$  piperidine):  $\lambda_{\text{max}} (\epsilon) = 408$  nm ( $24400 \text{ l}\cdot\text{mol}^{-1}\cdot\text{cm}^{-1}$ ); HRMS (ESI):  $m/z$  calcd for  $\text{C}_{16}\text{H}_{18}\text{N}_3\text{O}_3$ : 300.1343  $[\text{M}+\text{H}]^+$ ; found: 300.1342.

2-(4'-((4''-morpholinophenyl)diazenyl)phenoxy)acetic acid **16c**

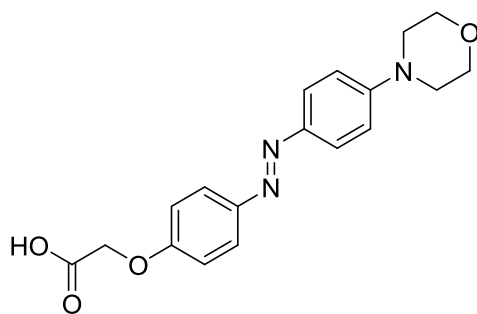

Standard Procedure **C** with ester **1c** (70.0 mg, 0.19 mmol, 1.0 equiv.) gave carboxylic acid **16c** (54.2 mg, 84 %) as a yellow solid after evaporation of the solvent.  $R_f = 0.20$  (MeOH); m.p. 312 °C;  $^1\text{H-NMR}$  (500 MHz, DMSO- $d_6$ ):  $\delta = 7.76$  (d,  $J = 9.2$  Hz, 2 H), 7.73 (d,  $J = 9.2$  Hz, 2 H), 7.08 (d,  $J = 9.2$  Hz, 2 H), 6.90 (d,  $J = 8.8$  Hz, 2 H), 4.14 (s, 2 H), 3.78 - 3.74 (m, 4 H), 3.30 - 3.27 (m, 4 H);  $^{13}\text{C-NMR}$  (126 MHz, DMSO- $d_6$ ):  $\delta = 169.1, 161.9, 153.0, 146.1, 145.0, 124.2, 123.9, 115.4, 114.6, 68.9, 66.4, 47.8$ ; IR:  $\tilde{\nu} = 3464, 3205, 2970, 2851, 1740, 1574, 1423, 1377, 1346, 1227, 1123, 926, 841$ ; UV-VIS (CH<sub>3</sub>CN + 0.5 % piperidine):  $\lambda_{max} (\epsilon) = 392$  nm (26200 l·mol<sup>-1</sup>·cm<sup>-1</sup>); HRMS (ESI):  $m/z$  calcd for C<sub>18</sub>H<sub>20</sub>N<sub>3</sub>O<sub>4</sub>: 342.1448 [M+H]<sup>+</sup>; found: 342.1454.

2-(4'-((4''-(4'''-methylpiperazin-1'''-yl)phenyl)diazenyl)phenoxy)acetic acid **16d**

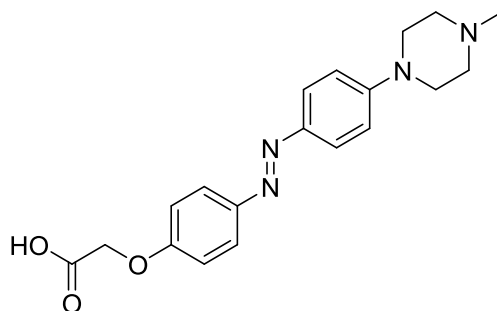

Standard Procedure **C** with ester **1d** (70.0 mg, 0.18 mmol, 1.0 equiv.) gave carboxylic acid **16d** (38.2 mg, 59 %) as a yellow solid after evaporation of the solvent.  $R_f = 0.20$  (MeOH); m.p. 255 °C (decomp.);  $^1\text{H-NMR}$  (500 MHz, D<sub>2</sub>O):  $\delta = 7.67$  (d,  $J = 8.5$  Hz, 2 H), 7.64 (d,  $J = 8.8$  Hz, 2 H), 7.04 (d,  $J = 8.5$  Hz, 2 H), 6.99 (d,  $J = 8.2$  Hz, 2 H), 4.47 (s, 2 H), 3.22 (br s, 4 H), 2.55 (br s, 4 H), 2.24 (s, 3 H);  $^{13}\text{C-NMR}$  (126 MHz, D<sub>2</sub>O):  $\delta = 176.2, 160.0, 152.9, 146.5, 145.4, 124.0, 123.9, 116.4, 115.0, 66.8, 53.4, 48.0, 44.4$ ; IR:  $\tilde{\nu} = 3460, 2947, 2843, 2681, 2596, 1744, 1597, 1234, 1080, 840$ ; UV-VIS (CH<sub>3</sub>CN + 0.5 % piperidine):  $\lambda_{max} (\epsilon) = 395$  nm (26200 l·mol<sup>-1</sup>·cm<sup>-1</sup>); HRMS (ESI):  $m/z$  calcd for C<sub>19</sub>H<sub>23</sub>N<sub>4</sub>O<sub>3</sub>: 355.1765 [M+H]<sup>+</sup>; found: 355.1769.

4-((3',4'-dihydro-2*H*-benzo[b][1',4']oxazin-7'-yl)diazenyl)phenol **18**

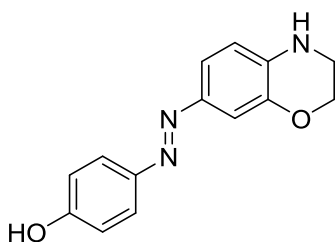

Standard Procedure **A1** with aniline **17** (156 mg, 1.04 mmol, 1.0 equiv.), phenol (103 mg, 1.09 mmol, 1.05 equiv.), and isoamyl nitrite (256 mg, 2.18 mmol, 2.1 equiv.) were converted to give a yellow solid (229 mg) that was dissolved in dry MeOH (12 mL), and HCl (4M in dioxane), and stirred at room temperature for 18 h. All solvents were removed under reduced pressure, and aq. NaHCO<sub>3</sub> (15 mL), CHCl<sub>3</sub> (20 mL), and acetone (2 mL) were added. The organic layer was separated, and the aqueous phase was extracted with CHCl<sub>3</sub> (3 × 20mL). The combined organic extracts were dried with Na<sub>2</sub>SO<sub>4</sub>, filtered, and concentrated under reduced pressure. Azobenzene **18** (145 mg, 55 %) was isolated as a brown oil after purification by silica-gel chromatography (EtOAc/petroleum ether, 1:4 → 1:1). *R<sub>f</sub>* = 0.45 (EtOAc/petroleum ether, 1:1); <sup>1</sup>H-NMR (400 MHz, DMSO-*d*<sub>6</sub>): δ = 10.00 (br s, 1 H), 7.65 (d, *J* = 8.8 Hz, 2 H), 7.30 (dd, *J* = 2.0, 8.5 Hz, 1 H), 7.15 (d, *J* = 2.3 Hz, 1 H), 6.88 (d, *J* = 9.1 Hz, 2 H), 6.66 (d, *J* = 8.5 Hz, 1 H), 4.15 (t, *J* = 4.4 Hz, 2 H); <sup>13</sup>C-NMR (101 MHz, DMSO-*d*<sub>6</sub>): δ = 159.8, 145.9, 143.6, 143.2, 138.7, 124.2, 120.1, 116.2, 113.8, 108.2, 64.6, 40.1; IR:  $\tilde{\nu}$  = 3360, 2920, 2851, 1740, 1582, 1501, 1211, 840, 810; UV-VIS (CH<sub>3</sub>CN + 0.5 % piperidine):  $\lambda_{max}$  ( $\epsilon$ ) = 406 nm (24000 l·mol<sup>-1</sup>·cm<sup>-1</sup>); HRMS (ESI): *m/z* calcd for C<sub>14</sub>H<sub>14</sub>N<sub>3</sub>O<sub>2</sub>: 256.1081 [M+H]<sup>+</sup>; found: 256.1081.

Ethyl-2-(4'-((3'',4''-dihydro-2''*H*-benzo[b][1'',4'']oxazin-7''-yl)diazenyl)phenoxy)acetate **19**

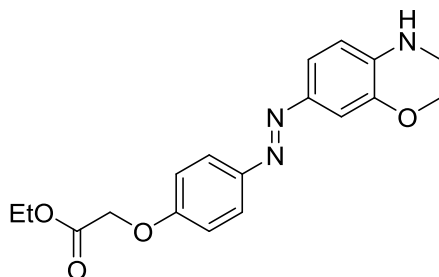

Standard Procedure **B** with azobenzene **18** (100 mg, 0.39 mmol, 1.0 equiv.), and ethyl bromoacetate (46  $\mu$ L, 0.41 mmol, 1.05 equiv.) gave azobenzene **19** (124 mg, 93 %) as an orange solid after purification by silica-gel chromatography (EtOAc/petroleum ether, 1:4 →

1:1).  $R_f = 0.35$  (EtOAc/petroleum ether, 1:2); m.p. 76 °C;  $^1\text{H-NMR}$  (400 MHz, DMSO- $d_6$ ):  $\delta = 7.73$  (d,  $J = 9.1$  Hz, 2 H), 7.34 (dd,  $J = 2.0, 8.5$  Hz, 1 H), 7.18 (d,  $J = 2.0$  Hz, 1 H), 7.06 (d,  $J = 9.1$  Hz, 2 H), 6.80 - 6.76 (m, 1 H), 6.68 (d,  $J = 8.5$  Hz, 1 H), 4.87 (s, 2 H), 4.19 (q,  $J = 7.1$  Hz, 2 H), 4.16 (t,  $J = 4.4$  Hz, 2 H), 3.43 - 3.37 (m,  $J = 2.3$  Hz, 2 H), 1.23 (t,  $J = 7.2$  Hz, 3 H);  $^{13}\text{C-NMR}$  (101 MHz, DMSO- $d_6$ ):  $\delta = 168.5, 158.8, 146.9, 143.0, 142.7, 138.8, 123.4, 120.2, 115.0, 113.2, 107.8, 64.8, 64.1, 60.7, 40.0, 14.0$ ; IR:  $\tilde{\nu} = 3356, 2970, 2928, 2870, 1751, 1597, 1500, 1315, 1261, 1080, 837, 810$ ; UV-VIS (CH<sub>3</sub>CN + 0.5 % piperidine):  $\lambda_{max} (\epsilon) = 408$  nm (24000 l·mol<sup>-1</sup>·cm<sup>-1</sup>); HRMS (ESI):  $m/z$  calcd for C<sub>18</sub>H<sub>20</sub>N<sub>3</sub>O<sub>4</sub>: 342.1448 [M+H]<sup>+</sup>; found: 342.1452.

2-(4'-((4''-methyl-3'',4''-dihydro-2''H-benzo[b][1'',4''']oxazin-7''-yl)diazenyl)phenoxy)acetic acid **20a**

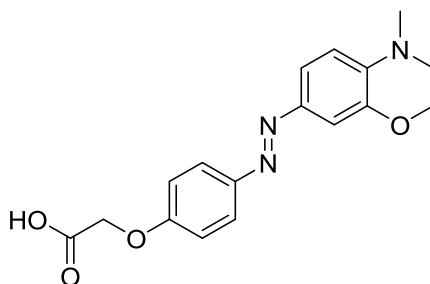

Standard Procedure **C** with ester **2a** (45.0 mg, 0.13 mmol, 1.0 equiv.) gave carboxylic acid **20a** (34 mg, 76 %) as a red solid after purification by silica-gel chromatography (CH<sub>2</sub>Cl<sub>2</sub>/MeOH, 10:1).  $R_f = 0.10$  (CH<sub>2</sub>Cl<sub>2</sub>/MeOH, 10:1); m.p. 172 °C;  $^1\text{H-NMR}$  (400 MHz, DMSO- $d_6$ ):  $\delta = 13.11$  (br s, 1 H), 7.75 (d,  $J = 9.1$  Hz, 2 H), 7.43 (dd,  $J = 2.3, 8.5$  Hz, 1 H), 7.19 (d,  $J = 2.0$  Hz, 1 H), 7.04 (d,  $J = 8.8$  Hz, 2 H), 6.80 (d,  $J = 8.8$  Hz, 1 H), 4.76 (s, 2 H), 4.29 - 4.19 (m, 2 H), 3.42 - 3.37 (m, 2 H), 2.98 (s, 3 H);  $^{13}\text{C-NMR}$  (101 MHz, DMSO- $d_6$ ):  $\delta = 170.4, 159.7, 147.2, 144.1, 143.9, 140.0, 124.0, 121.3, 115.4, 111.4, 106.7, 65.2, 64.5, 48.5, 38.4$ ; IR:  $\tilde{\nu} = 2916, 2851, 2326, 1736, 1520, 1215, 1080, 829, 795$ ; UV-VIS (CH<sub>3</sub>CN + 0.5 % piperidine):  $\lambda_{max} (\epsilon) = 417$  nm (26600 l·mol<sup>-1</sup>·cm<sup>-1</sup>); HRMS (ESI):  $m/z$  calcd for C<sub>17</sub>H<sub>18</sub>N<sub>3</sub>O<sub>4</sub>: 328.1292 [M+H]<sup>+</sup>; found: 328.1296.

2-(4'-((4''-benzyl-3'',4''-dihydro-2''*H*-benzo[*b*][1'',4'']oxazin-7''-yl)diazenyl)phenoxy)acetic acid **20b**

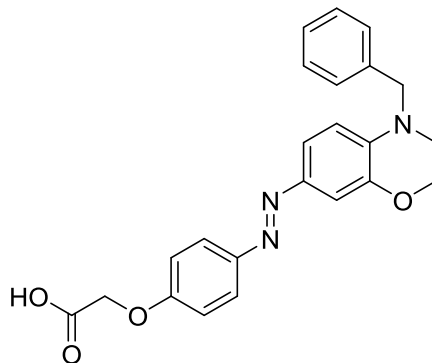

Standard Procedure **C** with ester **2b** (80.0 mg, 0.19 mmol, 1.0 equiv.) gave carboxylic acid **20b** (67 mg, 89 %) as an orange solid after purification by silica-gel chromatography (CH<sub>2</sub>Cl<sub>2</sub>/MeOH, 10:1). *R<sub>f</sub>* = 0.31 (CH<sub>2</sub>Cl<sub>2</sub>/MeOH, 10:1); m.p. 87 °C; <sup>1</sup>H-NMR (400 MHz, DMSO-*d*<sub>6</sub>): δ = 13.11 (br s, 1 H), 7.74 (d, *J* = 9.1 Hz, 2 H), 7.40 - 7.25 (m, 6 H), 7.24 (d, *J* = 2.3 Hz, 1 H), 7.04 (d, *J* = 9.1 Hz, 2 H), 6.80 (d, *J* = 8.8 Hz, 1 H), 4.76 (s, 2 H), 4.66 (s, 2 H), 4.28 (t, *J* = 4.4 Hz, 2 H), 3.55 (t, *J* = 4.4 Hz, 2 H); <sup>13</sup>C-NMR (101 MHz, DMSO-*d*<sub>6</sub>): δ = 170.4, 159.6, 147.2, 143.9, 143.6, 138.8, 138.0, 129.1, 127.5, 127.4, 124.0, 121.3, 115.4, 111.5, 107.3, 65.2, 64.3, 54.0, 47.5; IR:  $\tilde{\nu}$  = 3460, 2920, 2866, 2578, 1736, 1597, 1315, 1234, 844, 725; UV-VIS (CH<sub>3</sub>CN + 0.5 % piperidine):  $\lambda_{max}$  ( $\epsilon$ ) = 418 nm (22700 l·mol<sup>-1</sup>·cm<sup>-1</sup>); HRMS (ESI): *m/z* calcd for C<sub>23</sub>H<sub>22</sub>N<sub>3</sub>O<sub>4</sub>: 404.1605 [M+H]<sup>+</sup>; found: 404.1608.

4-((3',5'-dimethoxyphenyl)diazenyl)phenol **22**

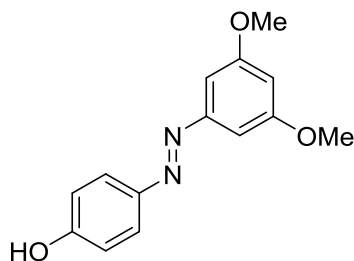

Standard Procedure **A1** with 3,5-trimethoxyaniline (307 mg, 2.0 mmol, 1.0 equiv.) and phenol (198 mg, 2.1 mmol, 1.05 equiv.) gave azobenzene **22** (215 mg, 42 %) as an orange solid after purification by silica-gel chromatography (EtOAc/petroleum ether, 1:4). *R<sub>f</sub>* = 0.38 (EtOAc/petroleum ether, 1:2); m.p. 129 °C; <sup>1</sup>H-NMR (300 MHz, CDCl<sub>3</sub>): δ = 7.89 (d, *J* = 8.8 Hz, 2 H), 7.10 (d, *J* = 2.2 Hz, 2 H), 6.95 (d, *J* = 8.8 Hz, 2 H), 6.59 (t, *J* = 2.2 Hz, 1 H),

3.88 (s, 6 H);  $^{13}\text{C}$ -NMR (101 MHz,  $\text{CDCl}_3$ ):  $\delta = 161.1, 158.4, 154.5, 147.0, 125.1, 115.8, 103.4, 100.7, 55.6$ ; IR:  $\tilde{\nu} = 3062, 2935, 1585, 1416, 1281, 1207, 1151, 1053, 942, 667$ ; UV-VIS ( $\text{CH}_3\text{CN} + 0.5\%$  piperidine):  $\lambda_{\text{max}} (\epsilon) = 355 \text{ nm} (21900 \text{ l}\cdot\text{mol}^{-1}\cdot\text{cm}^{-1})$ ; HRMS (ESI):  $m/z$  calcd for  $\text{C}_{14}\text{H}_{15}\text{N}_2\text{O}_3$ : 259.1077  $[\text{M}+\text{H}]^+$ ; found: 259.1082.

Methyl-2-(4'-((4''-hydroxy-3''-methoxyphenyl)diazenyl)phenoxy)acetate **25a**

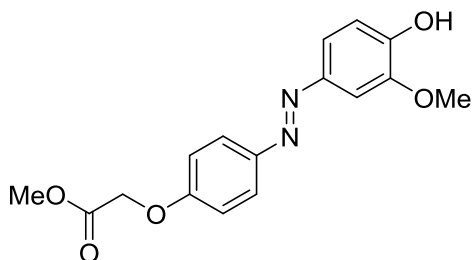

Standard Procedure **A1** with Boc-protected aniline **23** (200 mg, 0.68 mmol, 1.0 equiv.) and 2-methoxyphenol (88.3 mg, 0.71 mmol, 1.05 equiv.) gave after extraction, and evaporation of the solvent a residue that was redissolved in anhydrous MeOH (20 mL). Thionylchloride (1 mL) was added, and the mixture was stirred at room temperature for 2 h. The pH was adjusted to 7 with phosphate buffer, and  $\text{CHCl}_3$  (30 mL) was added. The organic layer was separated followed by extraction of the aqueous layer with  $\text{CHCl}_3$  ( $3 \times 20 \text{ mL}$ ). The combined organic extracts were dried with  $\text{Na}_2\text{SO}_4$ , filtered, and concentrated under reduced pressure. Purification by silica-gel chromatography ( $\text{CH}_2\text{Cl}_2/\text{MeOH}$ , 98:2) provided azobenzene **25a** (146 mg, 68 %) as an ochre solid.  $R_f = 0.47$  ( $\text{CH}_2\text{Cl}_2/\text{MeOH}$ , 98:2 + 1.0 % formic acid); m.p.  $133 \text{ }^\circ\text{C}$ ;  $^1\text{H}$ -NMR (300 MHz,  $\text{CDCl}_3$ ):  $\delta = 7.99$  (d,  $J = 8.7 \text{ Hz}$ , 2 H), 7.67 (dd,  $J = 2.1, 8.4 \text{ Hz}$ , 1 H), 7.60 (d,  $J = 2.1 \text{ Hz}$ , 1 H), 7.16 (d,  $J = 8.6 \text{ Hz}$ , 1 H), 7.13 (d,  $J = 9.1 \text{ Hz}$ , 2 H), 6.06 (br s, 1 H), 4.83 (s, 2 H), 4.10 (s, 3 H), 3.95 (s, 3 H);  $^{13}\text{C}$ -NMR (101 MHz,  $\text{CDCl}_3$ ):  $\delta = 169.0, 159.5, 148.5, 147.6, 147.1, 146.7, 124.3, 121.0, 114.9, 114.2, 101.8, 65.4, 56.1, 52.4$ ; IR:  $\tilde{\nu} = 3190, 2916, 2851, 1771, 1582, 1501, 1207, 1022, 837$ ; UV-VIS ( $\text{CH}_3\text{CN} + 0.5\%$  piperidine):  $\lambda_{\text{max}} (\epsilon) = 376 \text{ nm} (19000 \text{ l}\cdot\text{mol}^{-1}\cdot\text{cm}^{-1})$ ; HRMS (ESI):  $m/z$  calcd for  $\text{C}_{16}\text{H}_{17}\text{N}_2\text{O}_5$ : 317.1132  $[\text{M}+\text{H}]^+$ ; found: 317.1135.

Methyl-2-(4'-((4''-hydroxy-3'',5''-dimethoxyphenyl)diazenyl)phenoxy)acetate **25b**

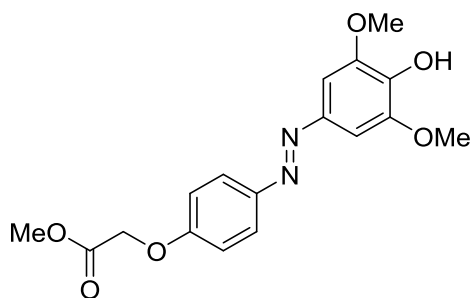

Standard Procedure **A1** with Boc-protected aniline **23** (500 mg, 1.69 mmol, 1.0 equiv.) and 2,6-dimethoxyphenol (274 mg, 1.78 mmol, 1.05 equiv.) gave after extraction and evaporation of the solvent a residue that was redissolved in dry MeOH (20 mL). Thionylchloride (1 mL) was added and the mixture was stirred at room temperature for 2 h. The pH was adjusted to 7 with phosphate buffer, and  $\text{CHCl}_3$  (30 mL) was added. The organic layer was separated followed by extraction of the aqueous layer with  $\text{CHCl}_3$  ( $3 \times 20$  mL). The combined organic extracts were dried with  $\text{Na}_2\text{SO}_4$ , filtered, and concentrated under reduced pressure. Purification by silica-gel chromatography (EtOAc/petroleum ether, 1:1) provided azobenzene **25b** (397 mg, 68 %) as an orange solid.  $R_f = 0.53$  (EtOAc/petroleum ether, 1:1); m.p. 122 °C;  $^1\text{H-NMR}$  (300 MHz,  $\text{CDCl}_3$ ):  $\delta = 7.89$  (d,  $J = 8.9$  Hz, 2 H), 7.28 (s, 2 H), 7.03 (d,  $J = 8.9$  Hz, 2 H), 5.82 (s, 1 H), 4.73 (s, 2 H), 4.01 (s, 6 H), 3.84 (s, 3 H);  $^{13}\text{C-NMR}$  (63 MHz,  $\text{CDCl}_3$ ):  $\delta = 169.0, 159.6, 147.5, 147.2, 145.5, 137.5, 124.3, 114.9, 100.2, 65.4, 56.4, 52.4$ ; IR:  $\tilde{\nu} = 3453, 2951, 1751, 1585, 1497, 1315, 1200, 1107, 841$ ; UV-VIS ( $\text{CH}_3\text{CN} + 0.5\%$  piperidine):  $\lambda_{\text{max}} (\epsilon) = 384$  nm ( $20000 \text{ l}\cdot\text{mol}^{-1}\cdot\text{cm}^{-1}$ ); HRMS (ESI):  $m/z$  calcd for  $\text{C}_{17}\text{H}_{19}\text{N}_2\text{O}_6$ : 347.1238  $[\text{M}+\text{H}]^+$ ; found: 347.1242.

#### 2-(4'-((4''-hydroxyphenyl)diazenyl)phenoxy)acetic acid **25f**

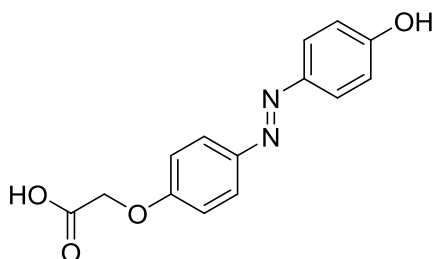

Standard Procedure **A1** with Boc-protected aniline **23** (100 mg, 0.34 mmol, 1.0 equiv.) and phenol (33.5 mg, 0.35 mmol, 1.05 equiv.) gave azobenzene **25f** (47 mg, 51 %) as an orange solid after silica-gel chromatography ( $\text{CH}_2\text{Cl}_2/\text{MeOH}$ , 98:2 + 1.0 % formic acid).  $R_f = 0.17$  ( $\text{CH}_2\text{Cl}_2/\text{MeOH}$ , 98:2 + 1.0 % formic acid); m.p. 186 °C;  $^1\text{H-NMR}$  (300 MHz,  $\text{CD}_3\text{OD}$ ):  $\delta = 7.83$  (d,  $J = 8.9$  Hz, 2 H), 7.77 (d,  $J = 8.8$  Hz, 2 H), 7.06 (d,  $J = 8.9$  Hz, 2 H), 6.90 (d,  $J = 8.8$  Hz, 2 H), 4.75 (s, 2 H);  $^{13}\text{C-NMR}$  (101 MHz,  $\text{CD}_3\text{OD}$ ):  $\delta = 171.0, 160.2, 159.9, 147.4,$



146.1, 124.2, 123.7, 115.3, 114.6, 64.7; IR:  $\tilde{\nu}$  = 3406, 2924, 1728, 1585, 1497, 1435, 1215, 1146, 1080, 837; UV-VIS (CH<sub>3</sub>CN + 0.5 % piperidine):  $\lambda_{max}(\epsilon)$  = 359 nm (16500 l·mol<sup>-1</sup>·cm<sup>-1</sup>); HRMS (ESI):  $m/z$  calcd for C<sub>14</sub>H<sub>13</sub>N<sub>2</sub>O<sub>4</sub>: 273.0870 [M+H]<sup>+</sup>; found: 273.0874.

2-(4'-((3'',4''-dimethoxyphenyl)diazenyl)phenoxy)acetic acid **26a**

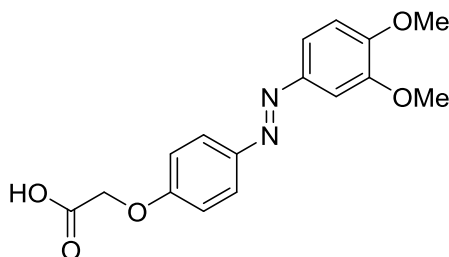

Standard Procedure C with ester **9a** (60 mg, 0.18 mmol, 1.0 equiv.) gave carboxylic acid **26a** (56 mg, 98 %) as a yellow solid after evaporation.  $R_f$  = 0.22 (EtOAc/petroleum ether, 3:7 + 0.5 % formic acid); m.p. 190 °C; <sup>1</sup>H-NMR (300 MHz, DMSO-*d*<sub>6</sub>):  $\delta$  = 7.83 (d,  $J$  = 9.0 Hz, 2 H), 7.53 (dd,  $J$  = 2.2, 8.5 Hz, 1 H), 7.42 (d,  $J$  = 2.2 Hz, 1 H), 7.14 (d,  $J$  = 8.7 Hz, 1 H), 7.07 (d,  $J$  = 8.8 Hz, 2 H), 4.77 (s, 2 H), 3.85 (s, 3 H), 3.84 (s, 3 H); <sup>13</sup>C-NMR (101 MHz, CDCl<sub>3</sub>):  $\delta$  = 170.4, 160.3, 152.0, 149.9, 146.9, 146.5, 124.5, 120.2, 115.5, 111.7, 102.3, 65.2, 56.2, 55.9; IR:  $\tilde{\nu}$  = 2916, 2851, 2577, 1736, 1705, 1578, 1497, 1231, 1018, 845; UV-VIS (CH<sub>3</sub>CN + 0.5 % piperidine):  $\lambda_{max}(\epsilon)$  = 372 nm (25300 l·mol<sup>-1</sup>·cm<sup>-1</sup>); HRMS (ESI):  $m/z$  calcd for C<sub>16</sub>H<sub>17</sub>N<sub>2</sub>O<sub>5</sub>: 317.1132 [M+H]<sup>+</sup>; found: 317.1134.

2-(4'-((3'',4'',5''-trimethoxyphenyl)diazenyl)phenoxy)acetic acid **26b**

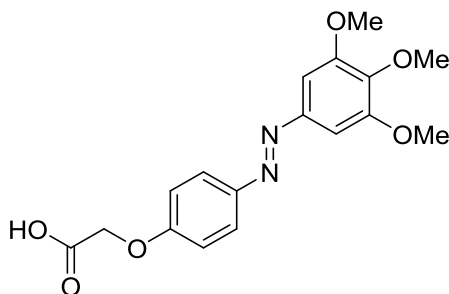

Standard Procedure C with ester **9b** (135 mg, 0.37 mmol, 1.0 equiv.) gave carboxylic acid **26b** (106 mg, 82 %) as an orange solid after purification by silica-gel chromatography (EtOAc/petroleum ether, 3:7 + 0.5 % formic acid).  $R_f$  = 0.22 (EtOAc/petroleum ether, 3:7 + 0.5 % formic acid); m.p. 110 °C; <sup>1</sup>H-NMR (300 MHz, CDCl<sub>3</sub>):  $\delta$  = 7.93 (d,  $J$  = 9.0 Hz, 2 H),

7.23 (s, 2 H), 7.06 (d,  $J = 9.0$  Hz, 2 H), 4.79 (s, 2 H), 3.98 (s, 6 H), 3.94 (s, 3 H);  $^{13}\text{C}$ -NMR (101 MHz,  $\text{CDCl}_3$ ):  $\delta = 172.6, 159.4, 153.5, 148.5, 147.7, 140.4, 124.6, 114.9, 100.2, 64.8, 61.0, 56.2$ ; IR:  $\tilde{\nu} = 2943, 2839, 2573, 1732, 1585, 1416, 1219, 1126, 991, 845$ ; UV-VIS ( $\text{CH}_3\text{CN} + 0.5\%$  piperidine):  $\lambda_{\text{max}} (\epsilon) = 368$  nm ( $22100 \text{ l}\cdot\text{mol}^{-1}\cdot\text{cm}^{-1}$ ); HRMS (ESI):  $m/z$  calcd for  $\text{C}_{17}\text{H}_{19}\text{N}_2\text{O}_6$ : 347.1238  $[\text{M}+\text{H}]^+$ ; found: 347.1241.

2-(4'-((4''-(2'''-hydroxyethoxy)-3'',5''-dimethoxyphenyl)diazenyl)phenoxy)acetic acid **26c**

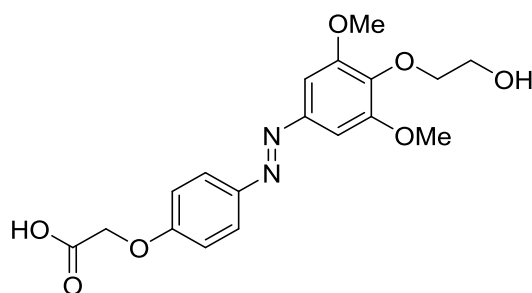

Standard Procedure **C** with ester **9c** (68 mg, 0.17 mmol, 1.0 equiv.) gave carboxylic acid **26c** (36 mg, 57 %) as a yellow solid after purification by preparative HPLC ( $\text{H}_2\text{O}/\text{CH}_3\text{CN}$ , 70:30  $\rightarrow$  0:100).  $R_f = 0.31$  ( $\text{CH}_2\text{Cl}_2/\text{MeOH}$ , 8:2); m.p. 183 °C;  $^1\text{H}$ -NMR (300 MHz,  $\text{DMSO}-d_6$ ):  $\delta = 7.86$  (d,  $J = 9.0$  Hz, 2 H), 7.21 (s, 2 H), 7.09 (d,  $J = 8.9$  Hz, 2 H), 4.79 (s, 2 H), 3.96 (t,  $J = 5.6$  Hz, 2 H), 3.87 (s, 6 H), 3.64 (t,  $J = 5.6$  Hz, 2 H);  $^{13}\text{C}$ -NMR (126 MHz,  $\text{DMSO}-d_6$ ):  $\delta = 170.4, 160.8, 153.8, 148.2, 146.8, 139.6, 124.8, 115.6, 100.5, 74.8, 65.3, 60.7, 56.5$ ; IR:  $\tilde{\nu} = 3410, 2932, 1593, 1493, 1258, 1126, 984, 826$ ; UV-VIS ( $\text{CH}_3\text{CN} + 0.5\%$  piperidine):  $\lambda_{\text{max}} (\epsilon) = 369$  nm ( $22000 \text{ l}\cdot\text{mol}^{-1}\cdot\text{cm}^{-1}$ ); HRMS (ESI):  $m/z$  calcd for  $\text{C}_{18}\text{H}_{21}\text{N}_2\text{O}_7$ : 377.1343  $[\text{M}+\text{H}]^+$ ; found: 377.1347.

2-(4'-((3'',5''-dimethoxy-4''-(2'''-(4''''-methylpiperazin-1''''-yl)ethoxy)phenyl)diazenyl)-phenoxy)acetic acid **26e**

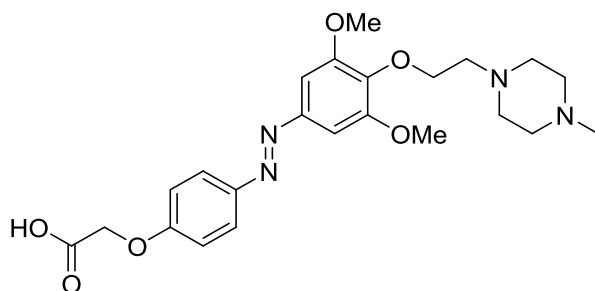

Standard Procedure **C** with ester **9e** (35 mg, 0.074 mmol, 1.0 equiv.) gave carboxylic acid **26e** (26 mg, 77 %) as a yellow solid after purification by preparative HPLC ( $\text{H}_2\text{O}/\text{CH}_3\text{CN}$ , 90:10  $\rightarrow$  0:100).  $R_f = 0.22$  ( $\text{CH}_2\text{Cl}_2/\text{MeOH}$ , 8:2); m.p. 128 °C;  $^1\text{H}$ -NMR (300 MHz,  $\text{D}_2\text{O}$ ):  $\delta = 7.26$

(d,  $J = 7.9$  Hz, 2 H), 6.70 (d,  $J = 8.0$  Hz, 2 H), 6.39 (s, 2 H), 4.31 (s, 2 H), 3.70 (s, 2 H), 3.45 (s, 6 H), 3.15 (br s, 4 H), 2.77 (s, 3 H), 2.88 - 2.66 (br s, 4 H);  $^{13}\text{C}$ -NMR (101 MHz,  $\text{D}_2\text{O}$ ):  $\delta = 175.7, 160.4, 152.4, 147.8, 145.7, 137.3, 124.3, 114.7, 99.6, 68.8, 66.7, 56.1, 55.6, 52.4, 49.6, 42.9$ ; IR:  $\tilde{\nu} = 3422, 2997, 2634, 2361, 1597, 1412, 1219, 1126, 1042, 941, 840$ ; UV-VIS ( $\text{CH}_3\text{CN} + 0.5\%$  piperidine):  $\lambda_{\text{max}} (\epsilon) = 368$  nm ( $22900 \text{ l}\cdot\text{mol}^{-1}\cdot\text{cm}^{-1}$ ); HRMS (ESI):  $m/z$  calcd for  $\text{C}_{23}\text{H}_{31}\text{N}_4\text{O}_6$ : 459.2238  $[\text{M}+\text{H}]^+$ ; found: 459.2243.

#### 2-(4'-((4''-methoxyphenyl)diazenyl)phenoxy)acetic acid **26f**

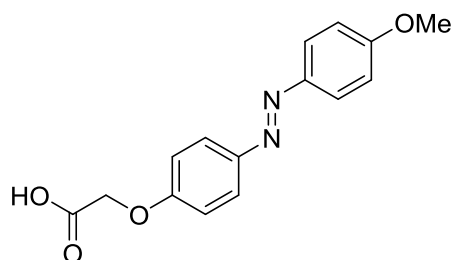

Standard Procedure **C** with ester **1f** (24 mg, 0.08 mmol, 1.0 equiv.) gave carboxylic acid **26f** (22 mg, 96 %) as a yellow solid after evaporation.  $R_f = 0.22$  (EtOAc/petroleum ether, 3:7 + 0.5 % formic acid); m.p. 104 °C;  $^1\text{H}$ -NMR (400 MHz,  $\text{DMSO}-d_6$ ):  $\delta = 13.10$  (br s, 1 H), 7.84 (t,  $J = 7.9$  Hz, 4 H), 7.11 (t,  $J = 9.8$  Hz, 4 H), 4.80 (s, 2 H), 3.86 (s, 3 H);  $^{13}\text{C}$ -NMR (101 MHz,  $\text{DMSO}-d_6$ ):  $\delta = 170.3, 162.0, 160.4, 146.9, 146.6, 124.7, 124.5, 115.5, 115.0, 65.2, 56.1$ ; IR:  $\tilde{\nu} = 2916, 2569, 1736, 1705, 1597, 1578, 1497, 1234, 1146, 841$ ; UV-VIS ( $\text{CH}_3\text{CN} + 0.5\%$  piperidine):  $\lambda_{\text{max}} (\epsilon) = 360$  nm ( $25000 \text{ l}\cdot\text{mol}^{-1}\cdot\text{cm}^{-1}$ ); HRMS (ESI):  $m/z$  calcd for  $\text{C}_{15}\text{H}_{15}\text{N}_2\text{O}_4$ : 287.1026  $[\text{M}+\text{H}]^+$ ; found: 287.1027.

#### Methyl-*N*-(5'-hydroxy-2'-((4''-methoxyphenyl)diazenyl)phenyl)succinamate **28a**

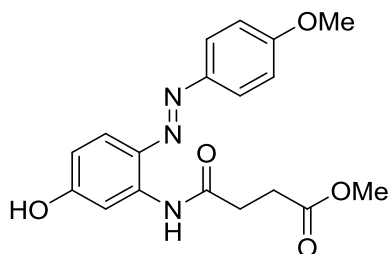

Standard Procedure **A1** with *p*-anisidine (123 mg, 1.00 mmol, 1.0 equiv.) and phenol **27** (201 mg, 1.05 mmol, 1.05 equiv.) gave after extraction and evaporation of the solvent a residue that was redissolved in anhydrous MeOH (20 mL). Thionylchloride (1 mL) was added and the mixture was stirred at room temperature for 2 h. The pH was adjusted to 7 with phosphate buffer and EtOAc (30 mL) was added. The organic layer was separated followed

by extraction of the aqueous layer with EtOAc (3 × 20 mL). The combined organic extracts were dried with Na<sub>2</sub>SO<sub>4</sub>, filtered, and concentrated under reduced pressure. Purification by silica-gel chromatography (EtOAc/petroleum ether, 1:2) provided azobenzene **28a** (201 mg, 56 %) as a yellow solid. *R<sub>f</sub>* = 0.21 (EtOAc/petroleum ether, 1:2); m.p. 189 °C; <sup>1</sup>H-NMR (300 MHz, DMSO-*d*<sub>6</sub>): δ = 10.28 (br s, 1 H), 10.19 (s, 1 H), 7.95 (d, *J* = 8.9 Hz, 2 H), 7.86 (d, *J* = 2.5 Hz, 1 H), 7.64 (d, *J* = 8.9 Hz, 1 H), 7.10 (d, *J* = 9.0 Hz, 2 H), 6.57 (dd, *J* = 2.6, 8.9 Hz, 1 H), 3.85 (s, 3 H), 3.59 (s, 3 H), 2.80 (t, *J* = 6.5 Hz, 2 H), 2.63 (t, *J* = 6.9 Hz, 2 H); <sup>13</sup>C-NMR (126 MHz, DMSO-*d*<sub>6</sub>): δ = 173.4, 170.8, 161.7, 161.7, 146.9, 138.6, 134.0, 125.0, 119.6, 114.9, 111.8, 107.6, 56.0, 51.9, 31.9, 29.1; IR:  $\tilde{\nu}$  = 3113, 2951, 2839, 1720, 1663, 1597, 1454, 1242, 1172, 1111, 841; UV-VIS (CH<sub>3</sub>CN + 0.5 % piperidine):  $\lambda_{max}$  ( $\epsilon$ ) = 390 nm (23000 l·mol<sup>-1</sup>·cm<sup>-1</sup>); HRMS (ESI): *m/z* calcd for C<sub>18</sub>H<sub>20</sub>N<sub>3</sub>O<sub>5</sub>: 358.1397 [M+H]<sup>+</sup>; found: 358.1401.

Methyl-*N*-(2'-((4'-bromophenyl)diazenyl)-5'-hydroxyphenyl)succinamate **28e**

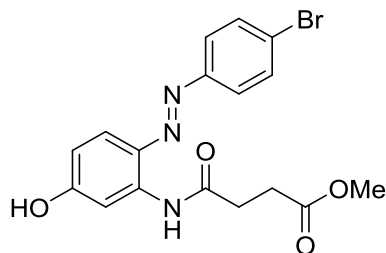

Standard Procedure **A1** with *p*-bromaniline (400 mg, 2.33 mmol, 1.0 equiv.), and phenol **27** (467 mg, 2.44 mmol, 1.05 equiv.) gave azobenzene **28e** (651 mg, 67 %) as an orange solid after recrystallization (toluene/petroleum ether, 3:1). *R<sub>f</sub>* = 0.30 (CH<sub>2</sub>Cl<sub>2</sub>/MeOH, 95:5); m.p. 192 °C; <sup>1</sup>H-NMR (400 MHz, DMSO-*d*<sub>6</sub>): δ = 10.55 (br s, 1 H), 10.24 (s, 1 H), 7.92 (d, *J* = 8.8 Hz, 2 H), 7.89 (d, *J* = 2.6 Hz, 1 H), 7.77 (d, *J* = 8.5 Hz, 2 H), 7.70 (d, *J* = 8.8 Hz, 1 H), 6.61 (dd, *J* = 2.5, 8.9 Hz, 1 H), 3.61 (s, 3 H), 2.82 (t, *J* = 6.7 Hz, 2 H), 2.64 (t, *J* = 6.4 Hz, 2 H); <sup>13</sup>C-NMR (101 MHz, DMSO-*d*<sub>6</sub>): δ = 173.4, 170.9, 162.9, 151.6, 139.5, 134.1, 132.7, 125.0, 124.1, 120.0, 112.1, 107.7, 51.9, 31.9, 29.0; IR:  $\tilde{\nu}$  = 3012, 2951, 2322, 1736, 1458, 1366, 1207, 833; UV-VIS (CH<sub>3</sub>CN + 0.5 % piperidine):  $\lambda_{max}$  ( $\epsilon$ ) = 464 nm (19800 l·mol<sup>-1</sup>·cm<sup>-1</sup>); HRMS (ESI): *m/z* calcd for C<sub>17</sub>H<sub>17</sub>BrN<sub>3</sub>O<sub>4</sub>: 406.0397/408.0379 [M+H]<sup>+</sup>; found: 406.0393/408.0375.

Methyl-*N*-(5'-methoxy-2'-((4'-methoxyphenyl)diazenyl)phenyl)succinamate **29a**

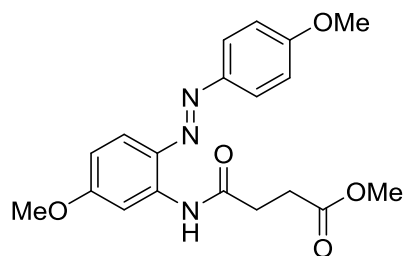

Standard Procedure **B** with azobenzene **28a** (70.0 mg, 0.20 mmol, 1.0 equiv.) and MeI (24.4  $\mu$ L, 0.39 mmol, 2.0 equiv.) gave azobenzene **29a** (66 mg, 91 %) as an ocher solid after purification by silica-gel chromatography (EtOAc/petroleum ether, 1:4  $\rightarrow$  1:2).  $R_f$  = 0.46 (EtOAc/petroleum ether, 1:2); m.p. 126  $^{\circ}$ C;  $^1$ H-NMR (300 MHz,  $\text{CDCl}_3$ ):  $\delta$  = 10.74 (br s, 1 H), 8.36 (d,  $J$  = 2.7 Hz, 1 H), 7.90 (d,  $J$  = 8.9 Hz, 2 H), 7.87 (d,  $J$  = 9.0 Hz, 1 H), 7.09 (d,  $J$  = 9.0 Hz, 2 H), 6.76 (dd,  $J$  = 2.7, 9.0 Hz, 1 H), 3.96 (s, 3 H), 3.95 (s, 3 H), 3.78 (s, 3 H), 2.87 (br. s, 4 H);  $^{13}$ C-NMR (101 MHz,  $\text{CDCl}_3$ ):  $\delta$  = 173.2, 170.1, 162.8, 161.7, 146.7, 136.9, 133.4, 124.1, 123.7, 114.4, 110.9, 103.5, 55.7, 55.6, 52.0, 32.8, 29.1; IR:  $\tilde{\nu}$  = 3337, 2932, 2835, 1744, 1670, 1582, 1470, 1227, 1168, 1034, 837; UV-VIS ( $\text{CH}_3\text{CN}$  + 0.5 % piperidine):  $\lambda_{\text{max}}$  ( $\epsilon$ ) = 384 nm (24500  $\text{l}\cdot\text{mol}^{-1}\cdot\text{cm}^{-1}$ ); HRMS (ESI):  $m/z$  calcd for  $\text{C}_{19}\text{H}_{22}\text{N}_3\text{O}_5$ : 372.1554  $[\text{M}+\text{H}]^+$ ; found: 372.1563.

Methyl-*N*-(2'-((4''-bromophenyl)diazenyl)-5'-methoxyphenyl)succinamate **29e**

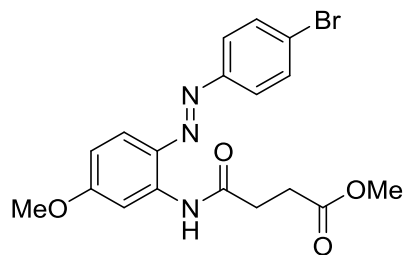

Standard Procedure **B** with azobenzene **28e** (555 mg, 1.37 mmol, 1.0 equiv.) and MeI (170  $\mu$ L, 2.73 mmol, 2.0 equiv.) gave azobenzene **29e** (520 mg, 91 %) as a yellow solid after purification by silica-gel chromatography ( $\text{CH}_2\text{Cl}_2/\text{MeOH}$ , 98:2).  $R_f$  = 0.31 ( $\text{CH}_2\text{Cl}_2/\text{MeOH}$ , 98:2); m.p. 140  $^{\circ}$ C;  $^1$ H-NMR (300 MHz,  $\text{CDCl}_3$ ):  $\delta$  = 10.66 (br s, 1 H), 8.32 (d,  $J$  = 2.7 Hz, 1 H), 7.84 (d,  $J$  = 9.0 Hz, 1 H), 7.74 (d,  $J$  = 8.8 Hz, 2 H), 7.65 (d,  $J$  = 8.8 Hz, 2 H), 6.72 (dd,  $J$  = 2.7, 9.1 Hz, 1 H), 3.91 (s, 3 H), 3.72 (s, 3 H), 2.81 (s, 4 H);  $^{13}$ C-NMR (75 MHz,  $\text{CDCl}_3$ ):  $\delta$  = 173.2, 170.3, 163.8, 151.2, 137.5, 133.4, 132.4, 124.7, 124.4, 123.8, 111.1, 103.5, 55.8, 52.0, 32.8, 29.0; IR:  $\tilde{\nu}$  = 3329, 2943, 2322, 1732, 1604, 1527, 1474, 1219, 1157, 833; UV-VIS ( $\text{CH}_3\text{CN}$  + 0.5 % piperidine):  $\lambda_{\text{max}}$  ( $\epsilon$ ) = 383 nm (19100  $\text{l}\cdot\text{mol}^{-1}\cdot\text{cm}^{-1}$ ); HRMS (ESI):  $m/z$  calcd for  $\text{C}_{18}\text{H}_{19}\text{BrN}_3\text{O}_4$ : 420.0553/422.0535  $[\text{M}+\text{H}]^+$ ; found: 420.0555/422.0537.

*N*-(2'-((4''-(Dimethylamino)phenyl)diazenyl)-5'-methoxyphenyl)succinimide **30b**

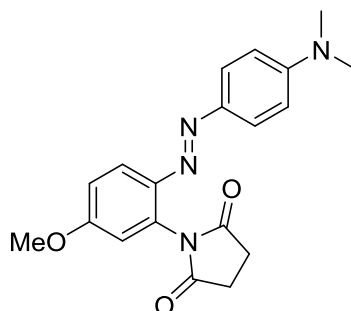

Standard Procedure **D** with azobenzene **29e** (100.0 mg, 0.24 mmol, 1.0 equiv.) and dimethylamine (92  $\mu$ L, 5.2 M in EtOH, 0.48 mmol, 2.0 equiv.) gave azobenzene **30b** (73 mg, 88 %) as a yellow solid after silica-gel chromatography (EtOAc/petroleum ether, 1:4  $\rightarrow$  EtOAc).  $R_f$  = 0.29 (EtOAc/petroleum ether, 2:1); m.p. 94  $^{\circ}$ C;  $^1\text{H-NMR}$  (300 MHz,  $\text{CDCl}_3$ ):  $\delta$  = 7.89 (d,  $J$  = 9.1 Hz, 1 H), 7.69 (d,  $J$  = 9.0 Hz, 2 H), 7.05 (dd,  $J$  = 2.7, 9.1 Hz, 1 H), 6.82 (d,  $J$  = 2.7 Hz, 1 H), 6.72 (d,  $J$  = 9.1 Hz, 2 H), 3.88 (s, 3 H), 3.08 (s, 6 H), 2.97 (s, 4 H);  $^{13}\text{C-NMR}$  (101 MHz,  $\text{CDCl}_3$ ):  $\delta$  = 176.4, 161.1, 152.3, 144.0, 141.8, 131.5, 124.7, 118.8, 116.3, 113.3, 111.5, 55.7, 40.3, 28.8; IR:  $\tilde{\nu}$  = 2920, 2361, 1717, 1601, 1369, 1146, 826; UV-VIS ( $\text{CH}_3\text{CN}$  + 0.5 % piperidine):  $\lambda_{\text{max}}$  ( $\epsilon$ ) = 421 nm (22400  $\text{l}\cdot\text{mol}^{-1}\cdot\text{cm}^{-1}$ ); HRMS (ESI):  $m/z$  calcd for  $\text{C}_{19}\text{H}_{21}\text{N}_4\text{O}_3$ : 353.1608  $[\text{M}+\text{H}]^+$ ; found: 353.1610.

*N*-(5'-Methoxy-2'-((4''-morpholinophenyl)diazenyl)phenyl)succinimide **30c**

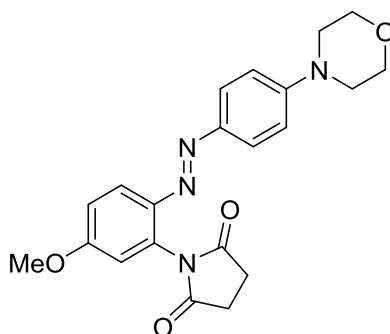

Standard Procedure **D** with azobenzene **29e** (80.0 mg, 0.19 mmol, 1.0 equiv.) and morpholine (33  $\mu$ L, 0.38 mmol, 2.0 equiv.) gave azobenzene **30c** (76 mg, 94 %) as a dark red solid after silica-gel chromatography ( $\text{CH}_2\text{Cl}_2/\text{MeOH}$ , 98:2).  $R_f = 0.46$  ( $\text{CH}_2\text{Cl}_2/\text{MeOH}$ , 98:2); m.p. 85  $^\circ\text{C}$ ;  $^1\text{H-NMR}$  (300 MHz,  $\text{CDCl}_3$ ):  $\delta = 7.90$  (d,  $J = 9.1$  Hz, 1 H), 7.69 (d,  $J = 9.0$  Hz, 2 H), 7.06 (dd,  $J = 2.7, 9.1$  Hz, 1 H), 6.92 (d,  $J = 9.1$  Hz, 2 H), 6.83 (d,  $J = 2.7$  Hz, 1 H), 3.91 - 3.84 (m, 8 H), 3.33 - 3.26 (m, 4 H), 2.97 (s, 4 H);  $^{13}\text{C-NMR}$  (75 MHz,  $\text{CDCl}_3$ ):  $\delta = 176.3, 161.6, 153.0, 146.0, 141.6, 132.0, 124.4, 118.9, 116.3, 114.4, 113.4, 66.6, 55.8, 48.1, 28.8$ ; IR:  $\tilde{\nu} = 2928, 2851, 2322, 1708, 1593, 1377, 1146, 926, 826$ ; UV-VIS ( $\text{CH}_3\text{CN} + 0.5\%$  piperidine):  $\lambda_{\text{max}} (\epsilon) = 404$  nm ( $24300 \text{ l}\cdot\text{mol}^{-1}\cdot\text{cm}^{-1}$ ); HRMS (ESI):  $m/z$  calcd for  $\text{C}_{21}\text{H}_{23}\text{N}_4\text{O}_4$ : 395.1714  $[\text{M}+\text{H}]^+$ ; found: 395.1714.

*N*-(5'-Methoxy-2'-((4''-(4'''-methylpiperazin-1'''-yl)phenyl)diazenyl)phenyl)succinimide **30d**

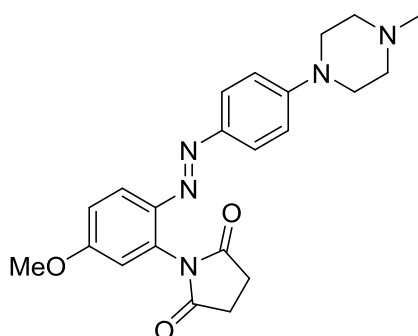

Standard Procedure **D** with azobenzene **29e** (100.0 mg, 0.24 mmol, 1.0 equiv.) and 1-methylpiperazine (53  $\mu$ L, 0.48 mmol, 2.0 equiv.) gave azobenzene **30d** (94 mg, 97 %) as an ocher solid after silica-gel chromatography ( $\text{CH}_2\text{Cl}_2/\text{MeOH}$ , 98:2  $\rightarrow$  93:7).  $R_f = 0.32$  ( $\text{CH}_2\text{Cl}_2/\text{MeOH}$ , 95:5); m.p. 86  $^\circ\text{C}$ ;  $^1\text{H-NMR}$  (400 MHz, MeOD):  $\delta = 7.85$  (d,  $J = 9.1$  Hz, 1 H), 7.69 (d,  $J = 9.1$  Hz, 2 H), 7.12 (dd,  $J = 2.6, 9.1$  Hz, 1 H), 7.03 (d,  $J = 9.1$  Hz, 2 H), 6.96 (d,  $J = 2.9$  Hz, 1 H), 3.89 (s, 3 H), 3.46 - 3.39 (m, 4 H), 2.96 (s, 4 H), 2.79 (t,  $J = 4.4$  Hz, 4 H), 2.48 (s, 3 H);  $^{13}\text{C-NMR}$  (101 MHz, MeOD):  $\delta = 177.7, 161.8, 152.8, 145.7, 141.7, 132.4, 124.0, 117.9, 115.7, 114.7, 113.5, 55.0, 53.9, 46.7, 44.0, 28.3$ ; IR:  $\tilde{\nu} = 2932, 2839, 1709, 1597, 1373, 1234, 1138, 1007, 822$ ; UV-VIS ( $\text{CH}_3\text{CN} + 0.5\%$  piperidine):  $\lambda_{\text{max}} (\epsilon) = 409$  nm ( $21000 \text{ l}\cdot\text{mol}^{-1}\cdot\text{cm}^{-1}$ ); HRMS (ESI):  $m/z$  calcd for  $\text{C}_{22}\text{H}_{26}\text{N}_5\text{O}_3$ : 408.2030  $[\text{M}+\text{H}]^+$ ; found: 408.2034.

*tert*-Butyl-2-hydroxy-5-((3',4',5'-trimethoxyphenyl)diazenyl)phenylcarbamate **33**

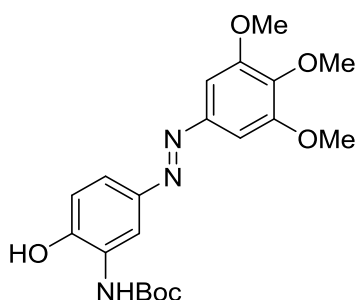

Standard Procedure **A2** with 3,4,5-trimethoxyaniline (1.0 g, 5.46 mmol, 1.0 equiv.) and phenol **32** (1.20 g, 5.73 mmol, 1.05 equiv.) gave azobenzene **33** (1.36 g, 62 %) as red solid after purification by silica-gel chromatography (EtOAc/petroleum ether, 1:4).  $R_f = 0.52$  (EtOAc/petroleum ether, 1:4); m.p. 80 °C;  $^1\text{H-NMR}$  (300 MHz,  $\text{CDCl}_3$ ):  $\delta = 8.73$  (br s, 1 H), 7.76 (d,  $J = 1.6$  Hz, 1 H), 7.68 (dd,  $J = 2.0, 8.7$  Hz, 1 H), 7.20 (s, 2 H), 7.08 (d,  $J = 8.8$  Hz, 1 H), 6.79 (br s, 1 H), 3.96 (s, 6 H), 3.94 (s, 3 H), 1.56 (s, 9 H);  $^{13}\text{C-NMR}$  (101 MHz,  $\text{CDCl}_3$ ):  $\delta = 154.8, 153.6, 148.4, 140.6, 129.9, 126.8, 122.1, 118.8, 112.6, 105.2, 100.2, 82.4, 61.1, 56.3, 28.2$ ; IR:  $\tilde{\nu} = 3260, 2970, 2361, 1736, 1597, 1493, 1366, 1219, 1123, 999$ ; UV-VIS ( $\text{CH}_3\text{CN} + 0.5\%$  piperidine):  $\lambda_{\text{max}} (\epsilon) = 473$  nm ( $27300 \text{ l}\cdot\text{mol}^{-1}\cdot\text{cm}^{-1}$ ); HRMS (ESI):  $m/z$  calcd for  $\text{C}_{20}\text{H}_{26}\text{N}_3\text{O}_6$ : 404.1816  $[\text{M}+\text{H}]^+$ ; found: 404.1824.

*tert*-Butyl-2-methoxy-5-((3',4',5'-trimethoxyphenyl)diazenyl)phenylcarbamate **34**

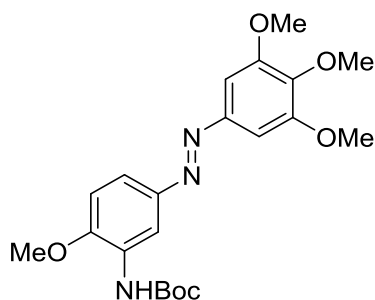

Standard Procedure **B** with azobenzene **33** (1.25 g, 3.10 mmol, 1.0 equiv.) and MeI (386  $\mu\text{L}$ , 6.20 mmol, 2.0 equiv.) gave azobenzene **34** (1.18 g, 91 %) as a yellow solid after purification by silica-gel chromatography (EtOAc/petroleum ether, 1:4).  $R_f = 0.27$  (EtOAc/petroleum ether, 1:4); m.p. 132 °C;  $^1\text{H-NMR}$  (300 MHz,  $\text{CDCl}_3$ ):  $\delta = 8.72$  (s, 1 H), 7.62 (dd,  $J = 2.4, 8.6$  Hz, 1 H), 7.26 (s, 2 H), 7.17 (s, 1 H), 6.98 (d,  $J = 8.7$  Hz, 1 H), 3.97 (s, 9 H), 3.93 (s, 3 H), 1.57 (s, 9 H);  $^{13}\text{C-NMR}$  (75 MHz,  $\text{CDCl}_3$ ):  $\delta = 153.4, 152.5, 149.7, 148.6, 146.9, 139.9, 128.7, 119.0, 111.1, 109.6, 100.1, 80.6, 61.0, 56.2, 56.0, 28.3$ ; IR:  $\tilde{\nu} = 2970, 2836, 2361, 1720, 1593, 1520, 1366, 1219, 1119, 992$ ; UV-VIS ( $\text{CH}_3\text{CN} + 0.5\%$  piperidine):  $\lambda_{\text{max}} (\epsilon) =$



372 nm ( $22100 \text{ l}\cdot\text{mol}^{-1}\cdot\text{cm}^{-1}$ ); HRMS (ESI):  $m/z$  calcd for  $\text{C}_{21}\text{H}_{28}\text{N}_3\text{O}_6$ : 418.1973  $[\text{M}+\text{H}]^+$ ; found: 418.1978.

*N*-(5'-Methoxy-2'-nitrophenyl)succinimide **p-35**

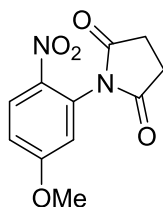

Under an atmosphere of nitrogen 5-methoxy-2-nitroaniline (2.00 g, 11.9 mmol, 1.0 equiv.) and  $\text{K}_2\text{CO}_3$  (4.11 g, 29.7 mmol, 2.5 equiv.) were suspended in dry THF (160 mL). Succinylchloride (1.31 mL, 11.9 mmol, 1.0 equiv.) was added dropwise and the reaction mixture was heated to  $45^\circ\text{C}$  for 16 h. The reaction mixture was concentrated under reduced pressure. The residue was dissolved in EtOAc (100 mL) and washed with water ( $2 \times 30 \text{ mL}$ ). The combined extracts were dried with  $\text{MgSO}_4$ , filtered, and concentrated under reduced pressure. Purification by silica-gel chromatography (EtOAc/petroleum ether, 1:1) provided succinimide **p-35** (1.95 g, 66%) as a yellow solid.  $R_f = 0.34$  (EtOAc/petroleum ether, 1:1); m.p.  $176^\circ\text{C}$ ;  $^1\text{H-NMR}$  (250 MHz,  $\text{CDCl}_3$ ):  $\delta = 8.27$  (d,  $J = 9.3 \text{ Hz}$ , 1 H), 7.07 (dd,  $J = 2.7, 9.1 \text{ Hz}$ , 1 H), 6.83 (d,  $J = 2.6 \text{ Hz}$ , 1 H), 3.94 (s, 3 H), 3.16 - 2.82 (m, 4 H);  $^{13}\text{C-NMR}$  (63 MHz,  $\text{CDCl}_3$ ):  $\delta = 176.3, 164.9, 139.0, 129.3, 129.2, 116.9, 115.7, 57.2, 29.8$ ; IR:  $\tilde{\nu} = 3356, 2839, 1786, 1701, 1585, 1489, 1280, 1173, 1092, 825$ ; HRMS (ESI):  $m/z$  calcd for  $\text{C}_{11}\text{H}_{11}\text{N}_2\text{O}_5$ : 251.0662  $[\text{M}+\text{H}]^+$ ; found: 251.0666.

*N*-(4'-Methoxy-2'-nitrophenyl)succinimide **m-35**

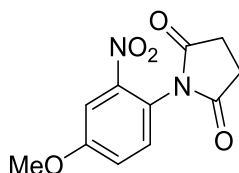

Under an atmosphere of nitrogen 5-methoxy-2-nitroaniline (2.00 g, 11.9 mmol, 1.0 equiv.) and  $\text{K}_2\text{CO}_3$  (4.11 g, 29.7 mmol, 2.5 equiv.) were suspended in dry THF (160 mL). Succinylchloride (1.31 mL, 11.9 mmol, 1.0 equiv.) was added dropwise and the reaction mixture was heated to  $45^\circ\text{C}$  for 16 h. The reaction mixture was concentrated under reduced pressure. The residue was dissolved in EtOAc (100 mL) and washed with water ( $2 \times 30 \text{ mL}$ ).

The combined organic extracts were dried with MgSO<sub>4</sub>, filtered, and concentrated under reduced pressure. Purification by silica-gel chromatography (EtOAc/petroleum ether, 1:1) provided succinimide **m-35** (1.94 g, 65%) as a yellow solid.  $R_f = 0.32$  (EtOAc/petroleum ether, 1:1); m.p. 176 °C; <sup>1</sup>H-NMR (300 MHz, CDCl<sub>3</sub>):  $\delta = 7.70$  (dd,  $J = 1.2, 1.8$  Hz, 1 H), 7.28 - 7.25 (m, 2 H), 3.92 (s, 3 H), 2.94 (d,  $J = 5.2$  Hz, 4 H); <sup>13</sup>C-NMR (75 MHz, CDCl<sub>3</sub>):  $\delta = 175.7, 160.3, 145.7, 131.3, 120.3, 118.3, 110.9, 56.2, 28.7$ ; IR:  $\tilde{\nu} = 3348, 3089, 2939, 1774, 1705, 1539, 1357, 1280, 1171, 1030, 887, 664$ ; HRMS (ESI):  $m/z$  calcd for C<sub>11</sub>H<sub>11</sub>N<sub>2</sub>O<sub>5</sub>: 251.0662 [M+H]<sup>+</sup>; found: 251.0666.

Methyl-*N*-(2'-((4''-hydroxy-3''-methoxyphenyl)diazenyl)-5'-methoxyphenyl)succinamate **36a**

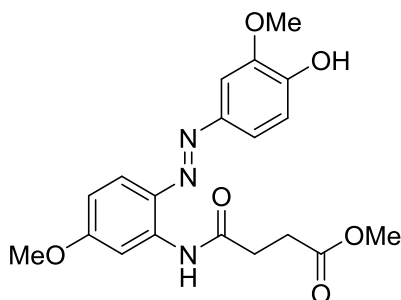

Nitrobenzene **p-35** (250 mg, 1.14 mmol, 1.0 equiv.) was reduced to the corresponding aniline (quant.) following Standard Procedure **F**. The crude material was converted according to Standard Procedure **A1** with 2-methoxyphenol (176 mg, 1.42 mmol, 1.05 equiv.) to give azobenzene **36a** (128 mg, 30 %) as chartreuse solid after purification by silica-gel chromatography (EtOAc/petroleum ether, 7:3 → EtOAc).  $R_f = 0.39$  (EtOAc/petroleum ether, 7:3); m.p. 104 °C; <sup>1</sup>H-NMR (300 MHz, CDCl<sub>3</sub>):  $\delta = 10.85$  (s, 1 H), 8.31 (d,  $J = 2.8$  Hz, 1 H), 7.81 (d,  $J = 9.0$  Hz, 1 H), 7.52 - 7.44 (m, 2 H), 7.06 (d,  $J = 8.9$  Hz, 1 H), 6.71 (dd,  $J = 2.7, 9.0$  Hz, 1 H), 4.01 (s, 3 H), 3.90 (s, 3 H), 3.71 (s, 3 H), 2.80 (s, 4 H); <sup>13</sup>C-NMR (63 MHz, CDCl<sub>3</sub>):  $\delta = 174.1, 171.2, 163.6, 149.3, 148.1, 147.3, 137.5, 134.2, 125.5, 120.6, 115.3, 111.7, 104.6, 103.0, 57.0, 56.6, 52.9, 33.8, 30.1$ ; IR:  $\tilde{\nu} = 3348, 2940, 2322, 1728, 1585, 1431, 1200, 1157, 1111, 1022, 848, 806$ ; UV-VIS (CH<sub>3</sub>CN + 0.5 % piperidine):  $\lambda_{max} (\epsilon) = 401$  nm (24100 l·mol<sup>-1</sup>·cm<sup>-1</sup>); HRMS (ESI):  $m/z$  calcd for C<sub>19</sub>H<sub>21</sub>N<sub>3</sub>O<sub>6</sub>: 388.1503 [M+H]<sup>+</sup>; found: 388.1511.

*N*-(2'-((4''-Hydroxy-3'',5''-dimethoxyphenyl)diazenyl)-5'-methoxyphenyl)succinimide **36b**

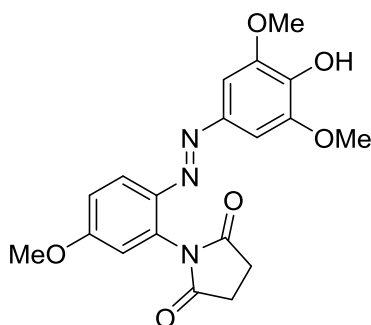

Nitrobenzene **p-35** (751 mg, 3.00 mmol, 1.0 equiv.) was reduced to the corresponding aniline (quant.) following Standard Procedure **F**. The crude material was converted according to Standard Procedure **A1** with 2,6-dimethoxyphenol (486 mg, 3.15 mmol, 1.05 equiv.) to give azobenzene **36b** (495 mg, 43 %) as a red solid after purification by silica-gel chromatography ( $\text{CH}_2\text{Cl}_2/\text{MeOH}$ , 98:2  $\rightarrow$  95:5).  $R_f = 0.48$  ( $\text{CH}_2\text{Cl}_2/\text{MeOH}$ , 97:3); m.p. 76 °C;  $^1\text{H-NMR}$  (300 MHz,  $\text{CDCl}_3$ ):  $\delta = 7.88$  (d,  $J = 9.0$  Hz, 1 H), 7.09 (s, 2 H), 7.06 (dd,  $J = 2.6, 9.1$  Hz, 1 H), 6.85 (d,  $J = 2.6$  Hz, 1 H), 3.95 (s, 6 H), 3.90 (s, 3 H), 3.02 - 2.87 (m, 4 H);  $^{13}\text{C-NMR}$  (101 MHz,  $\text{CDCl}_3$ ):  $\delta = 176.1, 162.0, 147.1, 146.0, 141.1, 137.8, 132.3, 118.8, 116.3, 113.5, 100.3, 56.2, 55.8, 28.8$ ; IR:  $\tilde{\nu} = 2940, 2839, 1705, 1604, 1508, 1377, 1234, 1176, 1026, 818$ ; UV-VIS ( $\text{CH}_3\text{CN} + 0.5\%$  piperidine):  $\lambda_{\text{max}} (\epsilon) = 394$  nm ( $16500 \text{ l}\cdot\text{mol}^{-1}\cdot\text{cm}^{-1}$ ); HRMS (ESI):  $m/z$  calcd for  $\text{C}_{19}\text{H}_{20}\text{N}_3\text{O}_6$ : 386.1347  $[\text{M}+\text{H}]^+$ ; found: 386.1351.

*N*-(2'-((3'',4''-Dimethoxyphenyl)diazenyl)-5'-methoxyphenyl)succinimide **37a**

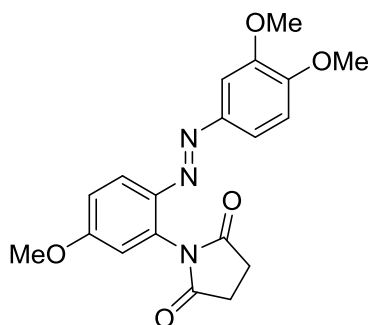

Standard Procedure **B** with azobenzene **36a** (69.4 mg, 0.19 mmol, 1.0 equiv.) and MeI (25.4  $\mu\text{L}$ , 0.41 mmol, 2.1 equiv.) gave azobenzene **37a** (47 mg, 68 %) as an orange solid after purification by silica-gel chromatography ( $\text{EtOAc}/\text{petroleum ether}$ , 1:1  $\rightarrow$   $\text{EtOAc}$ ).  $R_f = 0.50$  ( $\text{EtOAc}$ ); m.p. 89 °C;  $^1\text{H-NMR}$  (300 MHz,  $\text{CDCl}_3$ ):  $\delta = 7.91$  (d,  $J = 9.0$  Hz, 1 H), 7.46 (dd,  $J = 2.2, 8.5$  Hz, 1 H), 7.29 (d,  $J = 2.1$  Hz, 1 H), 7.07 (dd,  $J = 2.8, 9.1$  Hz, 1 H), 6.97 (d,  $J = 8.6$  Hz, 1 H), 6.86 (d,  $J = 2.8$  Hz, 1 H), 3.97 (s, 3 H), 3.93 (s, 3 H), 3.90 (s, 3 H), 3.03 - 2.90 (m, 4 H);  $^{13}\text{C-NMR}$  (101 MHz,  $\text{CDCl}_3$ ):  $\delta = 176.2, 162.0, 151.8, 149.4, 147.3, 141.2, 132.2,$

119.4, 119.1, 116.3, 113.5, 110.5, 102.9, 56.2, 55.8, 55.7, 28.8; IR:  $\tilde{\nu}$  = 2943, 2322, 1713, 1504, 1373, 1234, 1177, 1015, 814; UV-VIS (CH<sub>3</sub>CN + 0.5 % piperidine):  $\lambda_{max}$  ( $\epsilon$ ) = 374 nm (20600 l·mol<sup>-1</sup>·cm<sup>-1</sup>); HRMS (ESI):  $m/z$  calcd for C<sub>19</sub>H<sub>20</sub>N<sub>3</sub>O<sub>5</sub>: 370.1403 [M+H]<sup>+</sup>; found: 370.1404.

*N*-(2'-((3'',5''-Dimethoxy-4''-(2''''-(4''''-methylpiperazin-1''''-yl)ethoxy)phenyl)diazenyl)-5'-methoxyphenyl)succinimide **37b**

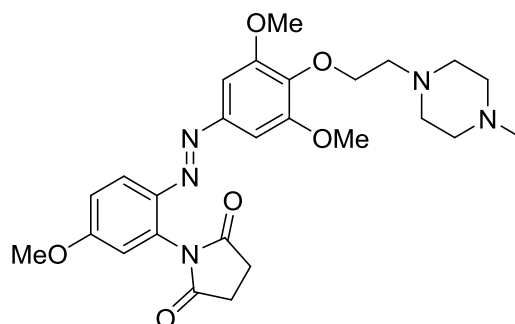

A microwave vial charged with azobenzene **37c** (64 mg, 0.13 mmol, 1.0 equiv.), 1-methylpiperazine (20  $\mu$ L, 0.18 mmol, 1.3 equiv.), K<sub>2</sub>CO<sub>3</sub> (25 mg, 0.18 mmol, 1.3 equiv.), and CH<sub>3</sub>CN (4 mL) was heated to 140 °C for 10 min. in a microwave. After cooling the solvent was removed under reduced pressure, and the residue was redissolved in CHCl<sub>3</sub> (10 mL). The organic phase was washed with water (5 mL), brine (5 mL), dried with Na<sub>2</sub>SO<sub>4</sub>, filtered, and concentrated under reduced pressure. Azobenzene **37b** (43 mg, 65 %) was obtained as an orange oil after purification by silica-gel chromatography (CH<sub>2</sub>Cl<sub>2</sub>/MeOH, 95:5  $\rightarrow$  90:10).  $R_f$  = 0.35 (CH<sub>2</sub>Cl<sub>2</sub>/MeOH, 9:1); <sup>1</sup>H-NMR (300 MHz, CDCl<sub>3</sub>):  $\delta$  = 7.89 (d,  $J$  = 9.0 Hz, 1 H), 7.07 (dd,  $J$  = 2.7, 9.1 Hz, 1 H), 7.03 (s, 2 H), 6.87 (d,  $J$  = 2.7 Hz, 1 H), 4.17 (t,  $J$  = 5.8 Hz, 2 H), 3.90 (s, 3 H), 3.90 (s, 6 H), 3.03 - 2.87 (m, 4 H), 2.82 (t,  $J$  = 5.8 Hz, 2 H), 2.69 (br s, 4 H), 2.56 (br s, 4 H), 2.34 (s, 3 H); <sup>13</sup>C-NMR (75 MHz, CDCl<sub>3</sub>):  $\delta$  = 176.1, 162.3, 153.6, 148.9, 141.0, 139.7, 132.7, 118.8, 116.3, 113.5, 100.2, 70.6, 57.9, 56.0, 55.8, 55.0, 53.3, 46.0, 28.8; IR:  $\tilde{\nu}$  = 2936, 2797, 1713, 1601, 1454, 1223, 1123, 1003, 822; UV-VIS (CH<sub>3</sub>CN + 0.5 % piperidine):  $\lambda_{max}$  ( $\epsilon$ ) = 371 nm (26400 l·mol<sup>-1</sup>·cm<sup>-1</sup>); HRMS (ESI):  $m/z$  calcd for C<sub>26</sub>H<sub>34</sub>N<sub>5</sub>O<sub>6</sub>: 512.2504 [M+H]<sup>+</sup>; found: 512.2510.

*N*-(2'-((4''-(2''''-Bromoethoxy)-3'',5''-dimethoxyphenyl)diazenyl)-5'-methoxyphenyl)succinimide **37c**

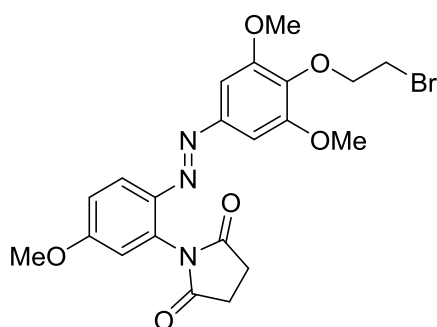

Standard Procedure **B** with azobenzene **36b** (200 mg, 0.52 mmol, 1.0 equiv.) and 1,2-dibromoethane (447  $\mu$ L, 5.19 mmol, 10.0 equiv.) in anhydrous acetone (50 mL) gave azobenzene **37c** (108 mg, 43 %) as a red solid after purification by silica-gel chromatography (EtOAc/petroleum ether, 1:2  $\rightarrow$  2:1).  $R_f$  = 0.23 (EtOAc/petroleum ether, 1:1); m.p. 126  $^{\circ}$ C;  $^1\text{H-NMR}$  (400 MHz,  $\text{CDCl}_3$ ):  $\delta$  = 7.91 (d,  $J$  = 9.1 Hz, 1 H), 7.09 (dd,  $J$  = 2.6, 9.1 Hz, 1 H), 7.06 (s, 2 H), 6.89 (d,  $J$  = 2.6 Hz, 1 H), 4.35 (t,  $J$  = 7.2 Hz, 2 H), 3.93 (s, 6 H), 3.92 (s, 3 H), 3.65 (t,  $J$  = 7.3 Hz, 2 H), 3.06 - 2.87 (m, 4 H);  $^{13}\text{C-NMR}$  (101 MHz,  $\text{CDCl}_3$ ):  $\delta$  = 176.1, 162.5, 153.4, 149.2, 141.0, 138.7, 132.8, 118.8, 116.3, 113.5, 100.1, 72.8, 56.1, 55.9, 29.6, 28.8; IR:  $\tilde{\nu}$  = 2936, 2835, 2318, 1709, 1377, 1234, 1177, 1123, 856, 822; UV-VIS ( $\text{CH}_3\text{CN}$  + 0.5 % piperidine):  $\lambda_{\text{max}}$  ( $\epsilon$ ) = 368 nm (24200  $\text{l}\cdot\text{mol}^{-1}\cdot\text{cm}^{-1}$ ); HRMS (ESI):  $m/z$  calcd for  $\text{C}_{21}\text{H}_{23}\text{BrN}_3\text{O}_6$ : 492.0765/494.0747  $[\text{M}+\text{H}]^+$ ; found: 492.0769/494.0750.

Methyl-*N*-(2'-((4''-hydroxy-3'',5''-dimethoxyphenyl)diazenyl)-4'-methoxyphenyl) succinamate **38**

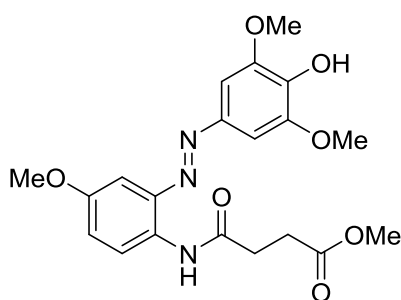

Nitrobenzene **m-35** (1.14 g, 4.56 mmol, 1.0 equiv.) was reduced to the corresponding aniline (quant.) following Standard Procedure **F**. The crude material was further converted according to Standard Procedure **A1** with 2,6-dimethoxyphenol (738 mg, 4.80 mmol, 1.05 equiv.). The resulting crude material was dissolved in anhydrous MeOH (20 mL). Thionylchloride (1 mL), was added and the mixture was stirred at room temperature for 2 h. The pH was adjusted to 7 with phosphate buffer, and  $\text{CHCl}_3$  (40 mL) was added. The organic layer was separated followed by extraction of the aqueous layer with  $\text{CHCl}_3$  ( $3 \times 30$  mL). The combined organic

extracts were dried with Na<sub>2</sub>SO<sub>4</sub>, filtered, and concentrated under reduced pressure. Purification by silica-gel chromatography (EtOAc/petroleum ether, 2:1 → EtOAc) provided azobenzene **38** (829 mg, 44 %) as an ocher solid. *R<sub>f</sub>* = 0.21 (EtOAc/petroleum ether, 1:2); m.p. 159 °C; <sup>1</sup>H-NMR (300 MHz, CDCl<sub>3</sub>): δ = 9.67 (br s, 1 H), 8.54 (d, *J* = 9.1 Hz, 1 H), 7.32 (s, 2 H), 7.27 (s, 1 H), 7.03 (dd, *J* = 3.0, 9.1 Hz, 1 H), 5.98 (s, 1 H), 4.03 (s, 6 H), 3.86 (s, 3 H), 3.67 (s, 3 H), 2.84 - 2.72 (m, 4 H); <sup>13</sup>C-NMR (75 MHz, CDCl<sub>3</sub>): δ = 173.4, 169.3, 155.8, 147.3, 145.5, 140.0, 138.4, 130.4, 121.6, 119.3, 101.4, 100.7, 56.5, 55.6, 52.0, 32.8, 29.5; IR:  $\tilde{\nu}$  = 3360, 2947, 2361, 1732, 1609, 1504, 1462, 1308, 1107, 1033, 814; UV-VIS (CH<sub>3</sub>CN + 0.5 % piperidine):  $\lambda_{max}$  ( $\epsilon$ ) = 515 nm (19100 l·mol<sup>-1</sup>·cm<sup>-1</sup>); HRMS (ESI): *m/z* calcd for C<sub>20</sub>H<sub>24</sub>N<sub>3</sub>O<sub>7</sub>: 418.1609 [M+H]<sup>+</sup>; found: 418.1622.

Methyl-*N*-(4'-methoxy-2'-((3'',4'',5''-trimethoxyphenyl)diazenyl)phenyl)succinamate **39**

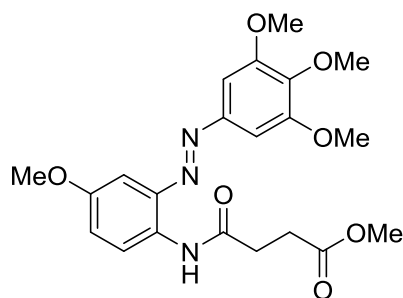

Standard Procedure **B** with azobenzene **38** (160 mg, 0.38 mmol, 1.0 equiv.) and MeI (47.7  $\mu$ L, 0.77 mmol, 2.0 equiv.) gave azobenzene **39** (147 mg, 89 %) as a yellow solid after purification by silica-gel chromatography (acetone/petroleum ether, 1:4). *R<sub>f</sub>* = 0.38 (acetone/petroleum ether, 1:3); m.p. 129 °C; <sup>1</sup>H-NMR (300 MHz, CDCl<sub>3</sub>): δ = 9.66 (br s, 1 H), 8.53 (d, *J* = 9.1 Hz, 1 H), 7.31 (d, *J* = 3.0 Hz, 1 H), 7.25 (s, 2 H), 7.04 (dd, *J* = 3.0, 9.2 Hz, 1 H), 3.97 (s, 6 H), 3.94 (s, 3 H), 3.84 (s, 3 H), 3.65 (s, 3 H), 2.81 - 2.68 (m, 4 H); <sup>13</sup>C-NMR (101 MHz, CDCl<sub>3</sub>): δ = 173.4, 169.4, 155.8, 153.7, 148.4, 141.1, 139.9, 130.7, 121.7, 119.9, 101.5, 100.6, 61.1, 56.3, 55.6, 52.0, 32.8, 29.5; IR:  $\tilde{\nu}$  = 3306, 2940, 2835, 1744, 1597, 1508, 1215, 1119, 1007, 845, 818; UV-VIS (CH<sub>3</sub>CN + 0.5 % piperidine):  $\lambda_{max}$  ( $\epsilon$ ) = 409 nm (23300 l·mol<sup>-1</sup>·cm<sup>-1</sup>); HRMS (ESI): *m/z* calcd for C<sub>21</sub>H<sub>26</sub>N<sub>3</sub>O<sub>7</sub>: 432.1765 [M+H]<sup>+</sup>; found: 432.1773.

3-Bromo-4-((3',4',5'-trimethoxyphenyl)diazenyl)phenol **41a**

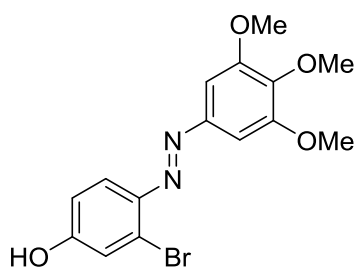

Standard Procedure **A1** with 3,4,5-trimethoxyaniline (366 mg, 2.0 mmol, 1.0 equiv.) and 3-bromophenol (363 mg, 2.1 mmol, 1.05 equiv.) gave azobenzene **41a** (516 mg, 70 %) as a dark green solid after purification by silica-gel chromatography (CH<sub>2</sub>Cl<sub>2</sub>/MeOH, 95:5 + 1.0 % formic acid).  $R_f = 0.45$  (CH<sub>2</sub>Cl<sub>2</sub>/MeOH, 95:5 + 1.0 % formic acid); m.p. 221 °C; <sup>1</sup>H-NMR (300 MHz, DMSO-*d*<sub>6</sub>):  $\delta = 7.64$  (d,  $J = 8.9$  Hz, 1 H), 7.21 (s, 2 H), 7.21 (d,  $J = 2.5$  Hz, 1 H), 6.88 (dd,  $J = 2.5, 8.9$  Hz, 1 H), 3.86 (s, 6 H), 3.75 (s, 3 H); <sup>13</sup>C-NMR (75 MHz, DMSO-*d*<sub>6</sub>):  $\delta = 162.1, 153.8, 148.5, 141.8, 140.5, 127.8, 120.0, 119.1, 116.4, 100.6, 60.7, 56.4$ ; IR:  $\tilde{\nu} = 3237, 2940, 1740, 1593, 1458, 1227, 1123, 984, 856$ ; UV-VIS (CH<sub>3</sub>CN + 0.5 % piperidine):  $\lambda_{max} (\epsilon) = 458$  nm (28300 l·mol<sup>-1</sup>·cm<sup>-1</sup>); HRMS (ESI):  $m/z$  calcd for C<sub>15</sub>H<sub>16</sub>BrN<sub>2</sub>O<sub>4</sub>: 367.0288/369.0267 [M+H]<sup>+</sup>; found: 367.0295/369.0274.

#### 4-((3',4',5'-Trimethoxyphenyl)diazenyl)resorcin **41b**

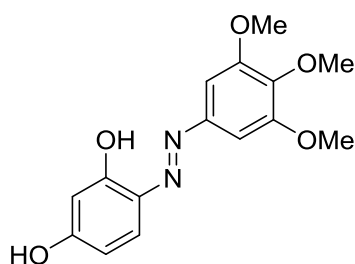

Standard Procedure **A1** with 3,4,5-trimethoxyaniline (366 mg, 2.0 mmol, 1.0 equiv.) and resorcin (231 mg, 2.1 mmol, 1.05 equiv.) gave azobenzene **41b** (347 mg, 57 %) as a red solid after purification by silica-gel chromatography (EtOAc/petroleum ether, 1:4 → 1:2).  $R_f = 0.42$  (EtOAc/petroleum ether, 1:2); m.p. 95 °C; <sup>1</sup>H-NMR (400 MHz, CDCl<sub>3</sub>):  $\delta = 13.83$  (br s, 1 H), 7.76 (d,  $J = 8.8$  Hz, 1 H), 7.10 (s, 2 H), 6.58 (dd,  $J = 2.5, 8.6$  Hz, 1 H), 6.46 (d,  $J = 2.6$  Hz, 1 H), 3.97 (s, 6 H), 3.95 (s, 3 H); <sup>13</sup>C-NMR (101 MHz, CDCl<sub>3</sub>):  $\delta = 160.7, 156.6, 153.7, 145.9, 139.7, 135.1, 132.9, 108.9, 103.8, 99.0, 61.1, 56.3$ ; IR:  $\tilde{\nu} = 3360, 2940, 2832, 1724, 1597, 1215, 1115, 1006, 826, 783$ ; UV-VIS (CH<sub>3</sub>CN + 0.5 % piperidine):  $\lambda_{max} (\epsilon) = 350$  nm (23800 l·mol<sup>-1</sup>·cm<sup>-1</sup>); HRMS (ESI):  $m/z$  calcd for C<sub>15</sub>H<sub>17</sub>N<sub>2</sub>O<sub>5</sub>: 305.1132 [M+H]<sup>+</sup>; found: 305.1133.

2-(3'-Hydroxy-4'-((3'',4'',5''-trimethoxyphenyl)diazenyl)phenoxy)acetic acid **42b**

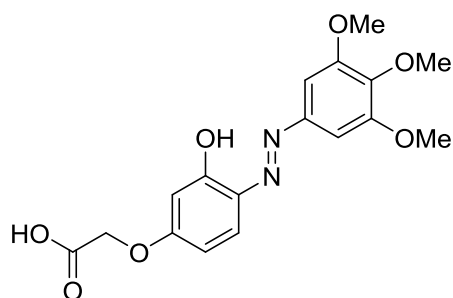

Standard Procedure **C** with ester **7b** (100 mg, 0.26 mmol, 1.0 equiv.) gave carboxylic acid **42b** (80 mg, 86 %) as a red solid after purification by silica-gel chromatography (EtOAc/petroleum ether, 3:7 → EtOAc + 0.5 % formic acid).  $R_f = 0.17$  (EtOAc/petroleum ether, 3:7 + 0.5 % formic acid); m.p. 204 °C;  $^1\text{H-NMR}$  (300 MHz, DMSO- $d_6$ ):  $\delta = 11.88$  (br s, 1 H), 7.73 (d,  $J = 9.0$  Hz, 1 H), 7.31 (s, 2 H), 6.60 (dd,  $J = 2.7, 9.0$  Hz, 1 H), 6.50 (d,  $J = 2.6$  Hz, 1 H), 4.71 (s, 2 H), 3.88 (s, 6 H), 3.74 (s, 3 H);  $^{13}\text{C-NMR}$  (75 MHz, DMSO- $d_6$ ):  $\delta = 169.7, 162.2, 156.0, 153.4, 146.9, 139.6, 132.9, 126.9, 108.1, 102.2, 99.8, 65.2, 60.2, 56.1$ ; IR:  $\tilde{\nu} = 3545, 2943, 2839, 2530, 1751, 1600, 1226, 1130, 1060, 825$ ; UV-VIS (CH<sub>3</sub>CN + 0.5 % piperidine):  $\lambda_{max}$  ( $\epsilon$ ) = 390 nm (27300 l·mol<sup>-1</sup>·cm<sup>-1</sup>); HRMS (ESI):  $m/z$  calcd for C<sub>17</sub>H<sub>19</sub>N<sub>2</sub>O<sub>7</sub>: 363.1187 [M+H]<sup>+</sup>; found: 363.1184.

2-((*tert*-Butyldimethylsilyl)oxy)-4-((3',4',5'-trimethoxyphenyl)diazenyl)phenol **44a**

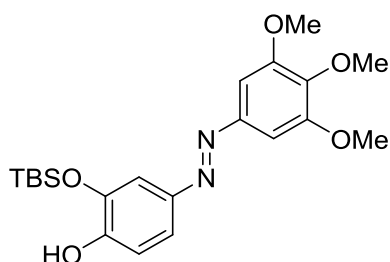

Standard Procedure **A1** with 3,4,5-trimethoxyaniline (366 mg, 2.0 mmol, 1.0 equiv.) and phenol **43a** (471 mg, 2.1 mmol, 1.05 equiv.) gave azobenzene **44a** (264 mg, 32 %) as a red oil after purification by silica-gel chromatography (EtOAc/petroleum ether, 1:4).  $R_f = 0.44$  (EtOAc/petroleum ether, 1:4);  $^1\text{H-NMR}$  (250 MHz, CDCl<sub>3</sub>):  $\delta = 7.57$  (dd,  $J = 2.2, 8.6$  Hz, 1 H), 7.45 (d,  $J = 2.2$  Hz, 1 H), 7.20 (s, 2 H), 7.06 (d,  $J = 8.6$  Hz, 1 H), 5.81 (s, 1 H), 3.98 (s, 6 H), 3.93 (s, 3 H), 1.06 (s, 9 H), 0.36 (s, 6 H);  $^{13}\text{C-NMR}$  (63 MHz, CDCl<sub>3</sub>):  $\delta = 153.5, 150.3, 148.5, 147.8, 146.5, 142.8, 119.6, 117.5, 110.7, 100.1, 61.0, 56.2, 25.7, 18.2, -4.3$ ; IR:  $\tilde{\nu} = 2932, 2859, 2361, 1740, 1593, 1493, 1258, 1219, 1126, 829, 783$ ; UV-VIS (CH<sub>3</sub>CN + 0.5 %



piperidine):  $\lambda_{max}$  ( $\epsilon$ ) = 375 nm ( $17300 \text{ l}\cdot\text{mol}^{-1}\cdot\text{cm}^{-1}$ ); HRMS (ESI):  $m/z$  calcd for  $\text{C}_{21}\text{H}_{31}\text{N}_2\text{O}_5\text{Si}$ : 419.1997  $[\text{M}+\text{H}]^+$ ; found: 419.2004.

#### 2-Bromo-4-((3',4',5'-trimethoxyphenyl)diazenyl)phenol **44b**

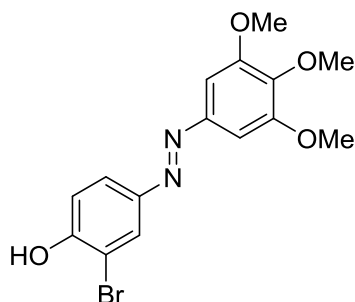

Standard Procedure **A1** with 3,4,5-trimethoxyaniline (366 mg, 2.0 mmol, 1.0 equiv.) and 2-bromophenol (363 mg, 2.1 mmol, 1.05 equiv.) gave azobenzene **44b** (402 mg, 55 %) as an ocher solid after purification by silica-gel chromatography ( $\text{CH}_2\text{Cl}_2/\text{MeOH}$ , 95:5 + 1.0 % formic acid).  $R_f$  = 0.45 ( $\text{CH}_2\text{Cl}_2/\text{MeOH}$ , 95:5 + 1.0 % formic acid); m.p. 161 °C;  $^1\text{H-NMR}$  (250 MHz,  $\text{CDCl}_3$ ):  $\delta$  = 8.11 (d,  $J$  = 2.2 Hz, 1 H), 7.88 (dd,  $J$  = 2.3, 8.7 Hz, 1 H), 7.23 (s, 2 H), 7.17 (d,  $J$  = 8.6 Hz, 1 H), 5.83 (s, 1 H), 3.97 (s, 6 H), 3.95 (s, 3 H);  $^{13}\text{C-NMR}$  (101 MHz,  $\text{CDCl}_3$ ):  $\delta$  = 154.4, 153.5, 148.2, 147.2, 140.6, 125.5, 116.1, 111.1, 100.3, 61.1, 56.2; IR:  $\tilde{\nu}$  = 3325, 2955, 1740, 1597, 1334, 1207, 1130, 991; UV-VIS ( $\text{CH}_3\text{CN}$  + 0.5 % piperidine):  $\lambda_{max}$  ( $\epsilon$ ) = 458 nm ( $28600 \text{ l}\cdot\text{mol}^{-1}\cdot\text{cm}^{-1}$ ); HRMS (ESI):  $m/z$  calcd for  $\text{C}_{15}\text{H}_{16}\text{BrN}_2\text{O}_4$ : 367.0288/369.0267  $[\text{M}+\text{H}]^+$ ; found: 367.0296/369.0275.

#### 8-Hydroxy-5-((3',4',5'-trimethoxyphenyl)diazenyl)quinolin **46a**

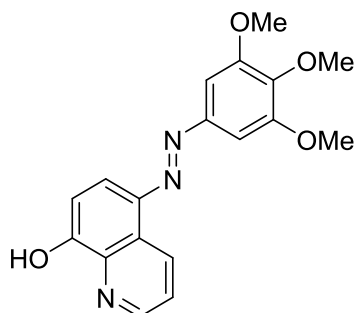

Standard Procedure **A1** with 3,4,5-trimethoxyaniline (366 mg, 2.0 mmol, 1.0 equiv.) and 8-hydroxyquinoline (305 mg, 2.1 mmol, 1.05 equiv.) gave azobenzene **46a** (419 mg, 62 %) as a dark green solid after purification by silica-gel chromatography ( $\text{CH}_2\text{Cl}_2/\text{MeOH}$ , 95:5 + 1.0 % formic acid).  $R_f$  = 0.46 ( $\text{CH}_2\text{Cl}_2/\text{MeOH}$ , 95:5 + 1.0 % formic acid); m.p. 180 °C;  $^1\text{H-NMR}$

NMR (300 MHz, CDCl<sub>3</sub>):  $\delta$  = 9.22 (dd,  $J$  = 1.6, 8.5 Hz, 1 H), 8.84 (dd,  $J$  = 1.5, 4.1 Hz, 1 H), 7.98 (d,  $J$  = 8.5 Hz, 1 H), 7.59 (dd,  $J$  = 4.2, 8.6 Hz, 1 H), 7.23 (d,  $J$  = 8.5 Hz, 1 H), 7.22 (s, 2 H), 3.96 (s, 6 H), 3.91 (s, 3 H); <sup>13</sup>C-NMR (101 MHz, CDCl<sub>3</sub>):  $\delta$  = 155.2, 153.6, 149.1, 148.5, 140.5, 139.9, 137.8, 132.8, 127.0, 122.8, 115.6, 110.0, 100.4, 61.1, 56.3; IR:  $\tilde{\nu}$  = 2940, 2322, 1740, 1574, 1493, 1458, 1312, 1215, 1126, 999, 787; UV-VIS (CH<sub>3</sub>CN + 0.5 % piperidine):  $\lambda_{max}$  ( $\epsilon$ ) = 494 nm (17400 l·mol<sup>-1</sup>·cm<sup>-1</sup>); HRMS (ESI):  $m/z$  calcd for C<sub>18</sub>H<sub>18</sub>N<sub>3</sub>O<sub>4</sub>: 340.1292 [M+H]<sup>+</sup>; found: 340.1298.

4-((3',4',5'-Trimethoxyphenyl)diazenyl)naphth-1-ol **46b**

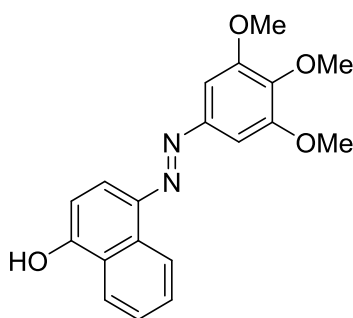

Standard Procedure **A1** with 3,4,5-trimethoxyaniline (366 mg, 2.0 mmol, 1.0 equiv.) and 1-naphthol (302 mg, 2.1 mmol, 1.05 equiv.) gave azobenzene **46b** (422 mg, 62 %) as an ochre solid after purification by silica-gel chromatography (EtOAc/petroleum ether, 1:4  $\rightarrow$  1:2).  $R_f$  = 0.59 (EtOAc/petroleum ether, 1:4); m.p. 185 °C; <sup>1</sup>H-NMR (300 MHz, DMSO-*d*<sub>6</sub>):  $\delta$  = 8.89 (d,  $J$  = 8.4 Hz, 1 H), 8.23 (d,  $J$  = 8.2 Hz, 1 H), 7.87 (d,  $J$  = 8.5 Hz, 1 H), 7.71 (ddd,  $J$  = 1.3, 6.9, 8.3 Hz, 1 H), 7.59 (ddd,  $J$  = 1.1, 7.0, 8.2 Hz, 1 H), 7.30 (s, 2 H), 7.00 (d,  $J$  = 8.6 Hz, 1 H), 3.93 (s, 6 H), 3.76 (s, 3 H); <sup>13</sup>C-NMR (75 MHz, DMSO-*d*<sub>6</sub>):  $\delta$  = 157.8, 153.4, 148.3, 139.3, 132.6, 127.9, 125.5, 124.6, 122.7, 122.5, 114.4, 108.9, 99.7, 79.2, 60.2, 56.0; IR:  $\tilde{\nu}$  = 3244, 2997, 2322, 1740, 1593, 1551, 1477, 1188, 1123, 1014, 814, 752; UV-VIS (CH<sub>3</sub>CN + 0.5 % piperidine):  $\lambda_{max}$  ( $\epsilon$ ) = 517 nm (18000 l·mol<sup>-1</sup>·cm<sup>-1</sup>); HRMS (ESI):  $m/z$  calcd for C<sub>19</sub>H<sub>19</sub>N<sub>2</sub>O<sub>4</sub>: 339.1339 [M+H]<sup>+</sup>; found: 339.1342.

4-((3',4',5'-Trimethoxyphenyl)diazenyl)-6,7-dimethoxynaphth-1-ol **46d**

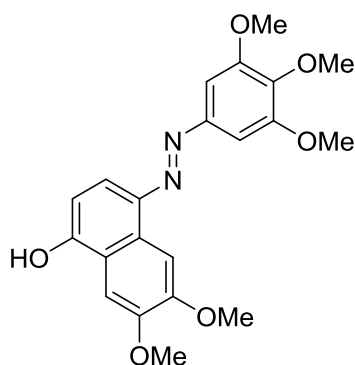

Standard Procedure **A1** with 3,4,5-trimethoxyaniline (366 mg, 2.0 mmol, 1.0 equiv.) and naphthol **45d** (429 mg, 2.1 mmol, 1.05 equiv.) gave azobenzene **46d** (488 mg, 62 %) as a dark red solid after purification by silica-gel chromatography (EtOAc/petroleum ether, 1:2 → 1:1).  $R_f = 0.45$  (EtOAc/petroleum ether, 1:2); m.p. 191 °C;  $^1\text{H-NMR}$  (600 MHz, DMSO- $d_6$ ):  $\delta = 8.22$  (br s, 1 H), 7.73 (d,  $J = 8.3$  Hz, 1 H), 7.49 (s, 1 H), 7.28 (br s, 2 H), 6.86 (d,  $J = 8.4$  Hz, 1 H), 3.98 (s, 3 H), 3.92 (s, 3 H), 3.91 (s, 6 H), 3.75 (s, 3 H);  $^{13}\text{C-NMR}$  (151 MHz, DMSO- $d_6$ ):  $\delta = 157.0, 153.8, 150.9, 149.3, 139.6, 138.7, 129.7, 120.2, 112.8, 108.0, 102.1, 101.8, 100.1, 79.6, 60.7, 56.3, 55.8, 55.6$ ; IR:  $\tilde{\nu} = 2940, 2839, 1736, 1593, 1543, 1458, 1373, 1226, 1122, 1003, 779$ ; UV-VIS (CH<sub>3</sub>CN + 0.5 % piperidine):  $\lambda_{\text{max}}$  ( $\epsilon$ ) = 517 nm (23000 l·mol<sup>-1</sup>·cm<sup>-1</sup>); HRMS (ESI):  $m/z$  calcd for C<sub>21</sub>H<sub>23</sub>N<sub>2</sub>O<sub>6</sub>: 399.1551 [M+H]<sup>+</sup>; found: 399.1561.

2-((5'-((3'',4'',5''-Trimethoxyphenyl)diazenyl)quinolin-8'-yl)oxy)acetic acid **47a**

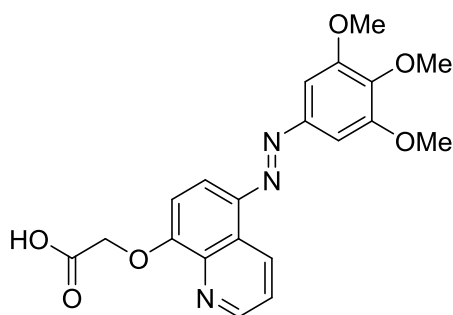

Standard Procedure **C** with ester **4a** (190 mg, 0.46 mmol, 1.0 equiv.) gave carboxylic acid **47a** (176 mg, 97 %) as a yellow solid after evaporation of the solvent.  $R_f = 0.20$  (EtOAc/petroleum ether, 3:7 + 0.5 % formic acid); m.p. 310 °C decomp.;  $^1\text{H-NMR}$  (300 MHz, DMSO- $d_6$ ):  $\delta = 9.33$  (dd,  $J = 1.7, 8.6$  Hz, 1 H), 9.01 (dd,  $J = 1.7, 4.1$  Hz, 1 H), 7.93 (d,  $J = 8.7$  Hz, 1 H), 7.77 (dd,  $J = 4.1, 8.6$  Hz, 1 H), 7.37 (s, 2 H), 7.29 (d,  $J = 8.8$  Hz, 1 H), 5.05 (s, 2 H), 3.94 (s, 6 H), 3.78 (s, 3 H);  $^{13}\text{C-NMR}$  (126 MHz, , DMSO- $d_6$ ):  $\delta = 171.5, 157.1, 153.8, 150.0, 148.9, 140.4,$

139.8, 138.9, 132.8, 127.7, 123.7, 114.5, 109.6, 100.7, 68.5, 60.9, 56.5; IR:  $\tilde{\nu}$  = 2936, 2835, 1624, 1408, 1312, 1107, 991, 783; UV-VIS (CH<sub>3</sub>CN + 0.5 % piperidine):  $\lambda_{\max}$  ( $\epsilon$ ) = 393 nm (25500 l·mol<sup>-1</sup>·cm<sup>-1</sup>); HRMS (ESI):  $m/z$  calcd for C<sub>20</sub>H<sub>20</sub>N<sub>3</sub>O<sub>6</sub>: 398.1347 [M+H]<sup>+</sup>; found: 398.1357.

2-((4'-((3'',4'',5''-Trimethoxyphenyl)diazenyl)naphth-1'-yl)oxy)acetic acid **47b**

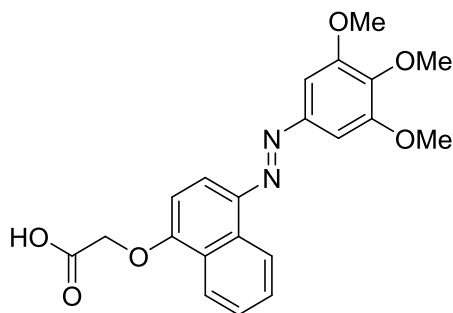

Standard Procedure **C** with ester **4b** (166 mg, 0.39 mmol, 1.0 equiv.) gave carboxylic acid **47b** (150 mg, 97 %) as an orange solid after evaporation of the solvent.  $R_f$  = 0.24 (EtOAc/petroleum ether, 3:7 + 0.5 % formic acid); m.p. 295 °C; <sup>1</sup>H-NMR (300 MHz, DMSO-*d*<sub>6</sub>):  $\delta$  = 8.91 (d,  $J$  = 8.3 Hz, 1 H), 8.32 (d,  $J$  = 8.2 Hz, 1 H), 7.84 (d,  $J$  = 8.6 Hz, 1 H), 7.71 (ddd,  $J$  = 0.9, 7.0, 8.4 Hz, 1 H), 7.61 (ddd,  $J$  = 0.9, 7.0, 8.4 Hz, 1 H), 7.33 (s, 2 H), 6.87 (d,  $J$  = 8.7 Hz, 1 H), 4.42 (s, 2 H), 3.93 (s, 6 H), 3.76 (s, 3 H); <sup>13</sup>C-NMR (75 MHz, DMSO-*d*<sub>6</sub>):  $\delta$  = 169.1, 158.8, 153.8, 149.1, 140.1, 140.1, 132.4, 128.0, 126.0, 125.6, 123.1, 122.9, 113.8, 106.0, 100.5, 69.2, 60.7, 56.5; IR:  $\tilde{\nu}$  = 3449, 2936, 2835, 1609, 1404, 1219, 1130, 984, 814, 760; UV-VIS (CH<sub>3</sub>CN + 0.5 % piperidine):  $\lambda_{\max}$  ( $\epsilon$ ) = 409 nm (23300 l·mol<sup>-1</sup>·cm<sup>-1</sup>); HRMS (ESI):  $m/z$  calcd for C<sub>21</sub>H<sub>21</sub>N<sub>2</sub>O<sub>6</sub>: 397.1394 [M+H]<sup>+</sup>; found: 397.1398.

2-((4'-((3'',4'',5''-Trimethoxyphenyl)diazenyl)-5'-methoxynaphthalen-1'-yl)oxy)acetic acid **47c**

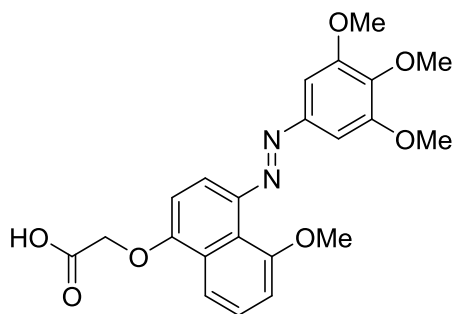

Standard Procedure **C** with ester **4c** (45 mg, 0.10 mmol, 1.0 equiv.) gave carboxylic acid **47c** (38 mg, 90 %) as an orange solid after evaporation of the solvent.  $R_f = 0.22$  (EtOAc/petroleum ether, 3:7 + 0.5 % formic acid); m.p. 196 °C;  $^1\text{H-NMR}$  (300 MHz,  $\text{DMSO-}d_6$ ):  $\delta = 7.94$  (d,  $J = 8.4$  Hz, 1 H), 7.55 (t,  $J = 8.1$  Hz, 1 H), 7.30 (s, 2 H), 7.29 (d,  $J = 7.7$  Hz, 1 H), 7.21 (d,  $J = 7.7$  Hz, 1 H), 6.99 (d,  $J = 8.5$  Hz, 1 H), 4.93 (s, 2 H), 3.92 (s, 3 H), 3.91 (s, 6 H), 3.77 (s, 3 H);  $^{13}\text{C-NMR}$  (75 MHz,  $\text{DMSO-}d_6$ ):  $\delta = 169.8, 156.4, 154.7, 153.3, 148.5, 144.3, 139.5, 127.0, 126.6, 121.0, 114.4, 113.0, 109.1, 105.6, 100.1, 65.4, 60.2, 56.4, 55.9$ ; IR:  $\tilde{\nu} = 2970, 2835, 1751, 1593, 1408, 1215, 1123, 1084, 748$ ; UV-VIS ( $\text{CH}_3\text{CN} + 0.5$  % piperidine):  $\lambda_{\text{max}} (\epsilon) = 398$  nm ( $22000 \text{ l}\cdot\text{mol}^{-1}\cdot\text{cm}^{-1}$ ); HRMS (ESI):  $m/z$  calcd for  $\text{C}_{22}\text{H}_{23}\text{N}_2\text{O}_7$ : 427.1500  $[\text{M}+\text{H}]^+$ ; found: 427.1505.

2-((4'-((3'',4'',5''-trimethoxyphenyl)diazonyl)-6',7'-dimethoxynaphth-1'-yl)oxy)acetic acid **47d**

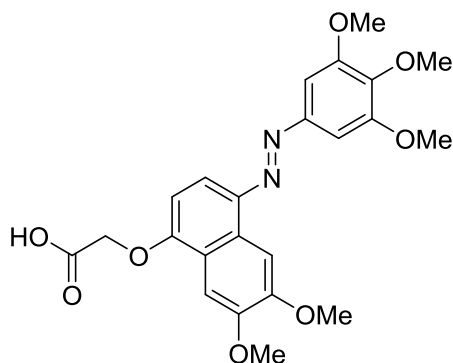

Standard Procedure **C** with ester **4d** (160 mg, 0.33 mmol, 1.0 equiv.) gave carboxylic acid **47d** (149 mg, 99 %) as an ocher solid after evaporation of the solvent.  $R_f = 0.23$  (EtOAc/petroleum ether, 3:7 + 0.5 % formic acid); m.p. 235 °C;  $^1\text{H-NMR}$  (250 MHz,  $\text{DMSO-}d_6$ ):  $\delta = 8.26$  (s, 1 H), 7.73 (d,  $J = 8.6$  Hz, 1 H), 7.58 (s, 1 H), 7.35 (s, 2 H), 6.91 (d,  $J = 8.6$  Hz, 1 H), 4.99 (s, 2 H), 4.00 (s, 3 H), 3.95 (s, 3 H), 3.94 (s, 6 H), 3.78 (s, 3 H);  $^{13}\text{C-NMR}$  (63 MHz,  $\text{DMSO-}d_6$ ):  $\delta = 171.3, 156.8, 154.7, 151.8, 150.7, 150.0, 141.1, 129.8, 121.6, 112.7, 105.8, 103.0, 102.1, 101.4, 66.5, 61.6, 57.3, 56.7, 56.6$ ; IR:  $\tilde{\nu} = 2932, 2832, 2361, 1732, 1481, 1312, 1211, 1168, 1111, 1002, 810$ ; UV-VIS ( $\text{CH}_3\text{CN} + 0.5$  % piperidine):  $\lambda_{\text{max}} (\epsilon) = 419$  nm ( $26000 \text{ l}\cdot\text{mol}^{-1}\cdot\text{cm}^{-1}$ ); HRMS (ESI):  $m/z$  calcd for  $\text{C}_{23}\text{H}_{25}\text{N}_2\text{O}_8$ : 457.1605  $[\text{M}+\text{H}]^+$ ; found: 457.1611.

1-((3',4',5'-trimethoxyphenyl)diazenyl)naphth-2-ol **49**

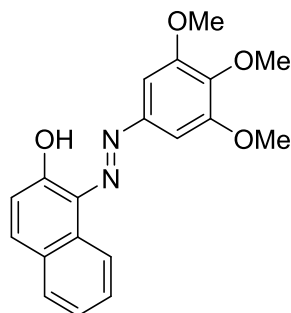

Standard Procedure **A1** with 3,4,5-trimethoxyaniline (366 mg, 2.0 mmol, 1.0 equiv.) and 2-naphthol (302 mg, 2.1 mmol, 1.05 equiv.) gave azobenzene **49** (574 mg, 85 %) as a red solid after purification by silica-gel chromatography (EtOAc/petroleum ether, 1:4  $\rightarrow$  1:2).  $R_f$  = 0.41(EtOAc/petroleum ether, 1:4); m.p. 114 °C;  $^1\text{H-NMR}$  (600 MHz,  $\text{CDCl}_3$ ):  $\delta$  = 8.58 (d,  $J$  = 8.3 Hz, 1 H), 7.74 (d,  $J$  = 9.4 Hz, 1 H), 7.65 (d,  $J$  = 7.9 Hz, 1 H), 7.58 (ddd,  $J$  = 1.1, 7.2, 8.3 Hz, 1 H), 7.41 (ddd,  $J$  = 0.9, 7.2, 7.9 Hz, 1 H), 7.04 (s, 2 H), 6.96 (d,  $J$  = 9.4 Hz, 1 H), 3.98 (s, 6 H), 3.93 (s, 3 H);  $^{13}\text{C-NMR}$  (151 MHz,  $\text{CDCl}_3$ ):  $\delta$  = 166.7, 154.0, 142.2, 138.6, 138.5, 133.3, 129.8, 128.6, 128.1, 125.4, 123.5, 121.5, 96.9, 61.1, 56.3; IR:  $\tilde{\nu}$  = 2970, 2820, 1748, 1597, 1450, 1215, 1123, 991, 818, 752; UV-VIS ( $\text{CH}_3\text{CN}$  + 0.5 % piperidine):  $\lambda_{\text{max}}$  ( $\epsilon$ ) = 469 nm ( $26300 \text{ l}\cdot\text{mol}^{-1}\cdot\text{cm}^{-1}$ ); HRMS (ESI):  $m/z$  calcd for  $\text{C}_{19}\text{H}_{19}\text{N}_2\text{O}_4$ : 339.1339 [ $\text{M}+\text{H}$ ] $^+$ ; found: 339.1344.

## Supplementary Note 1.

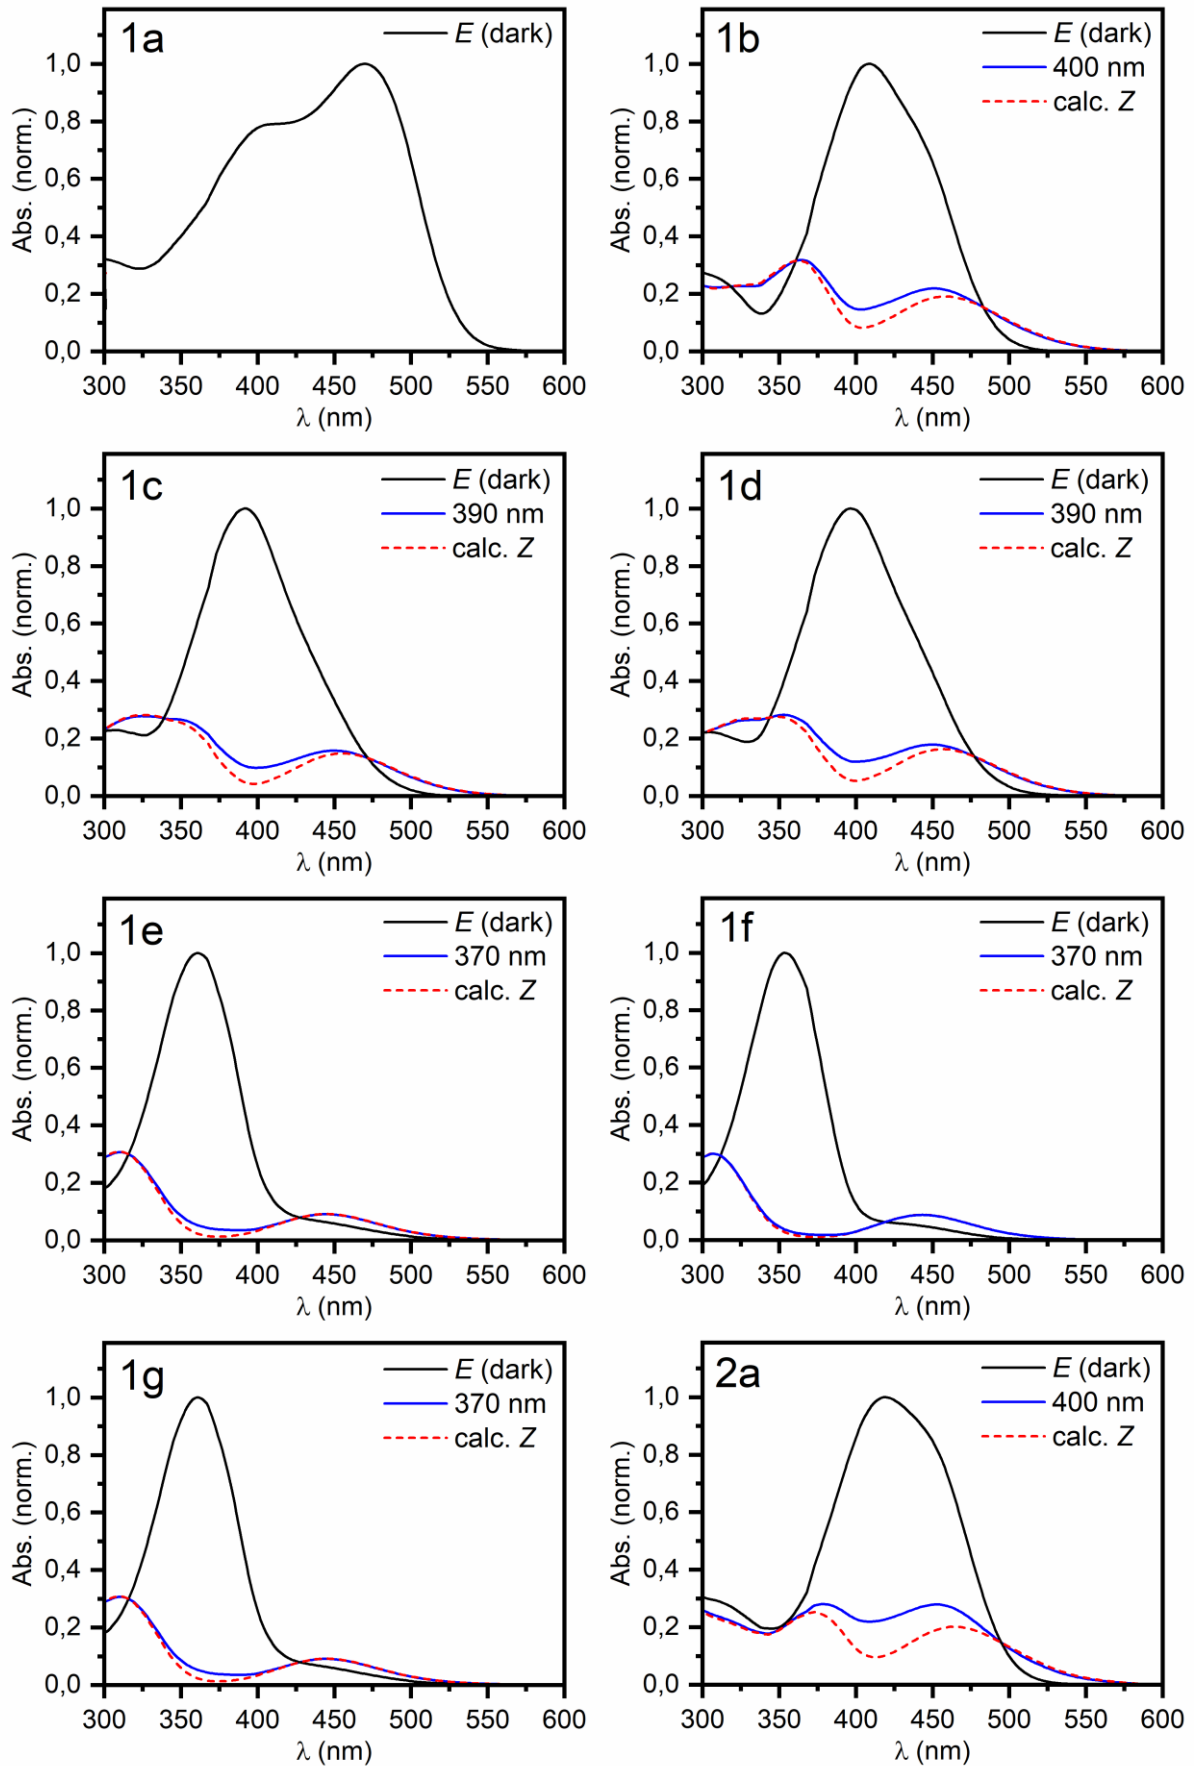

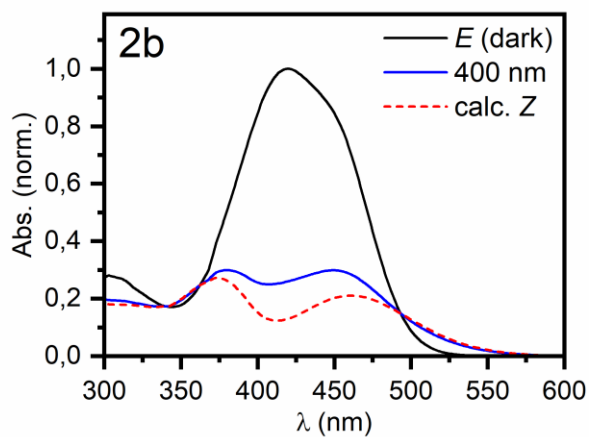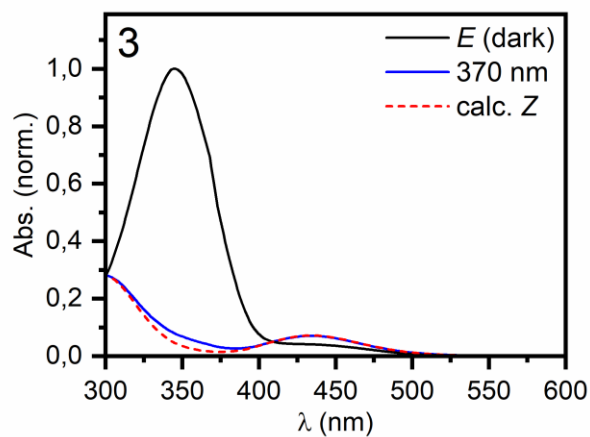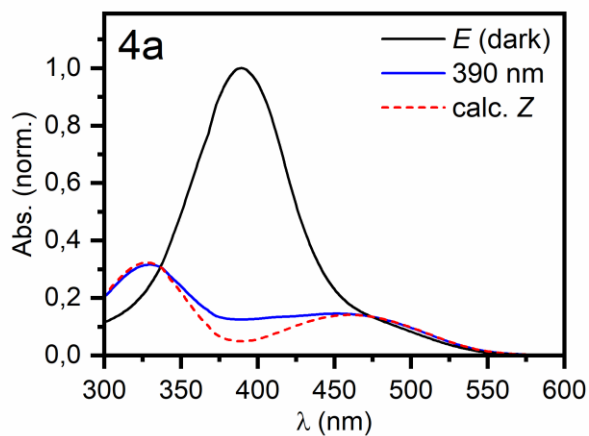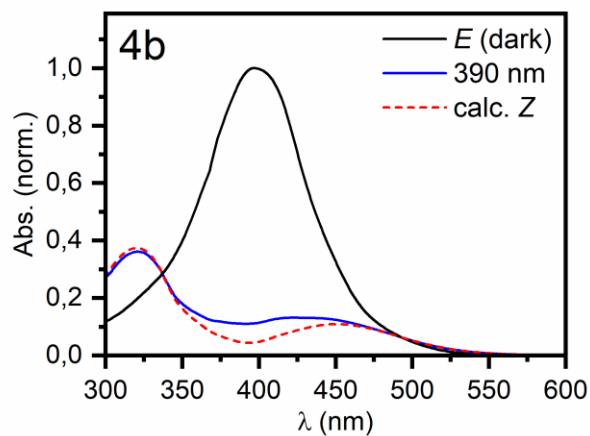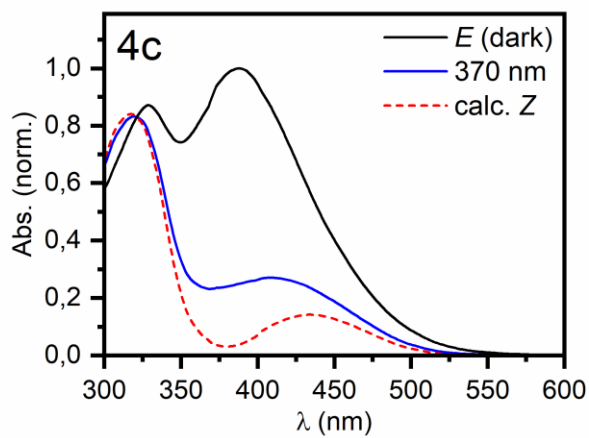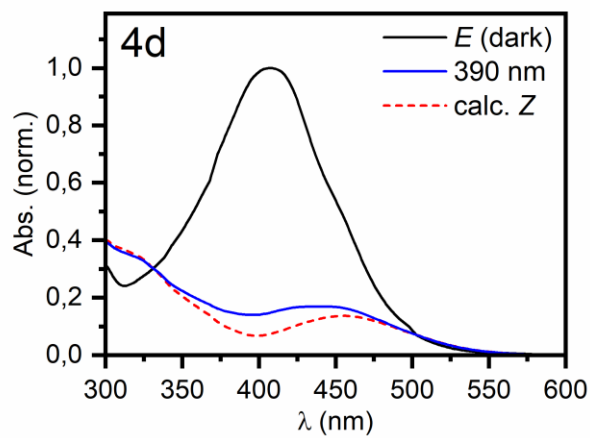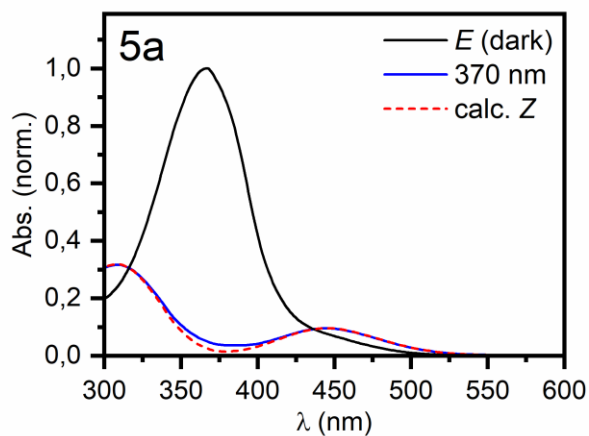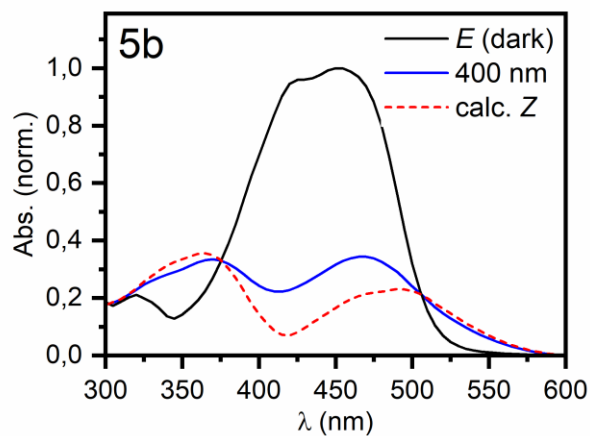



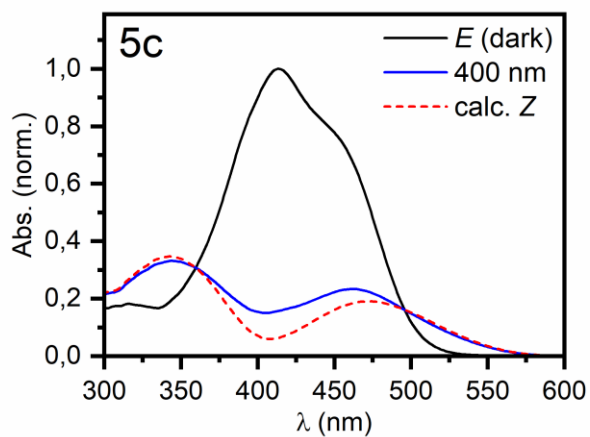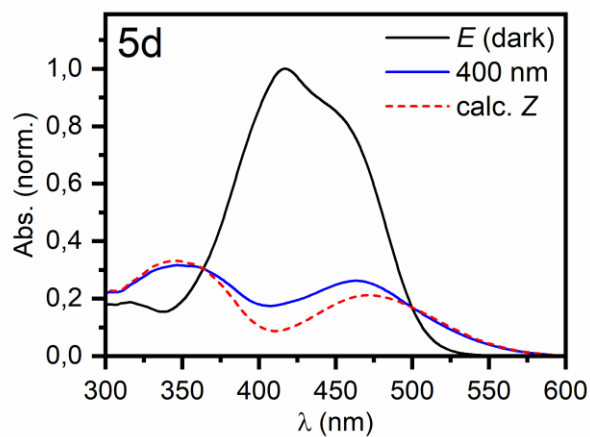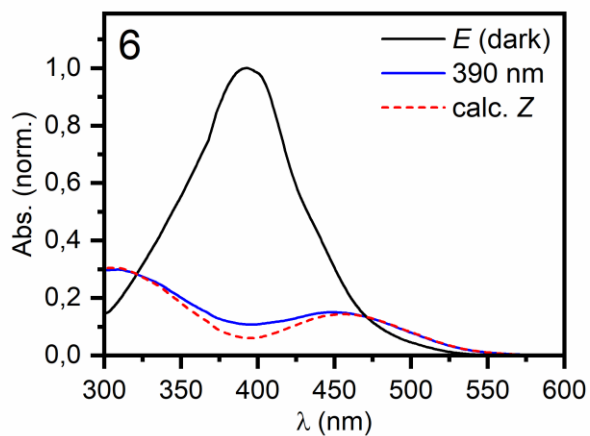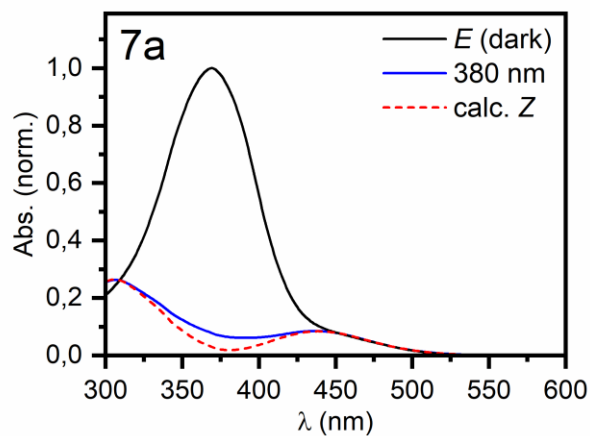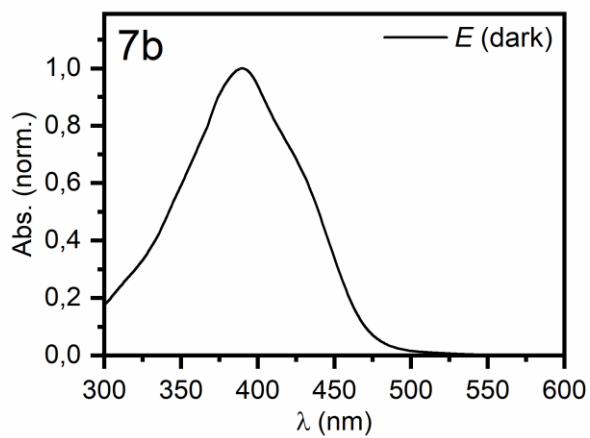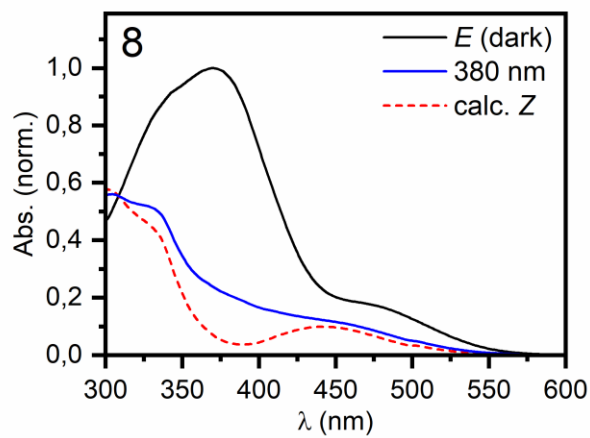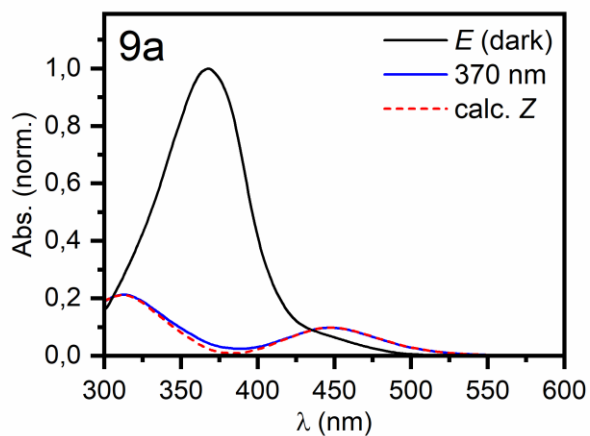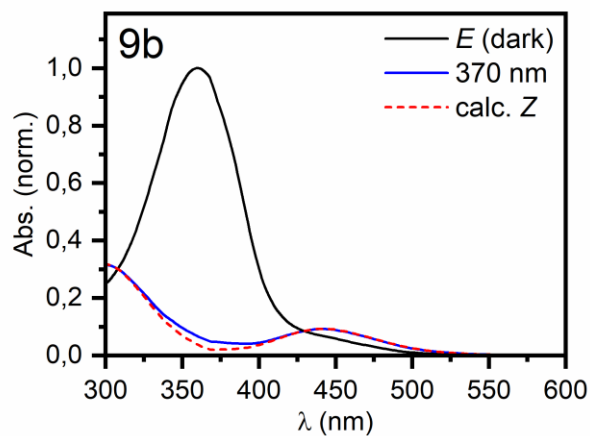

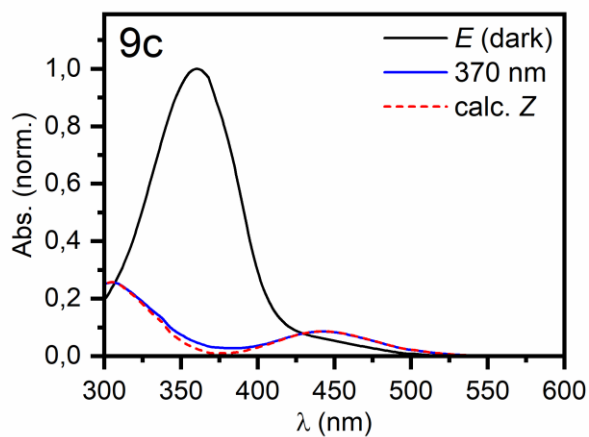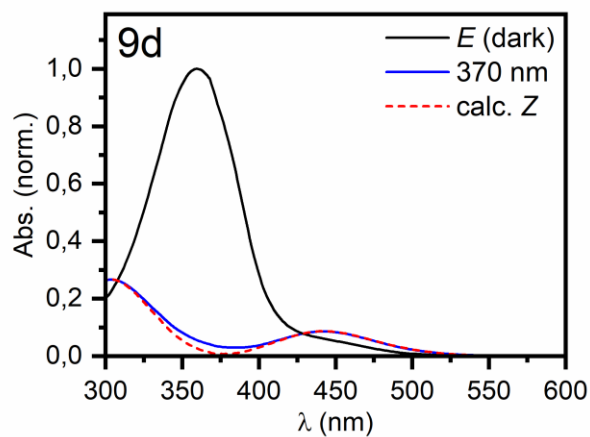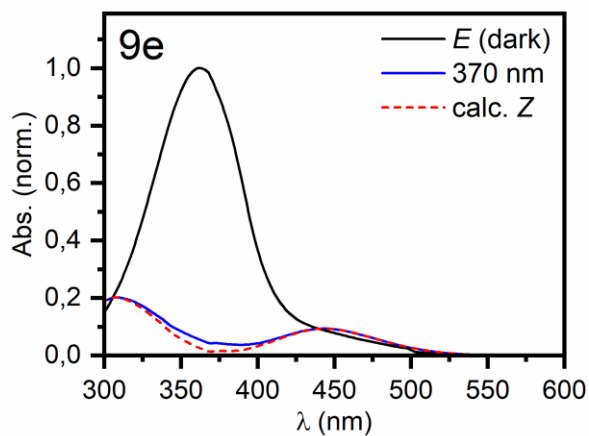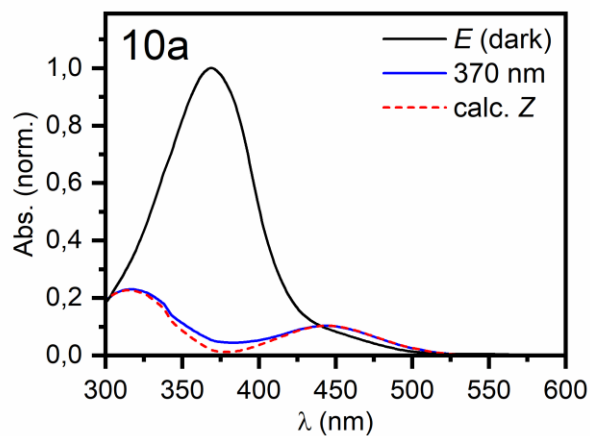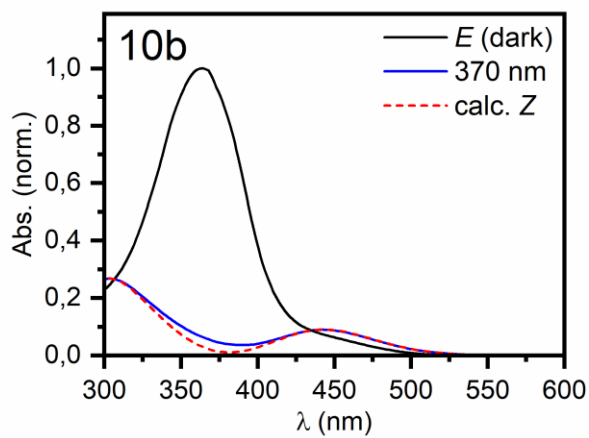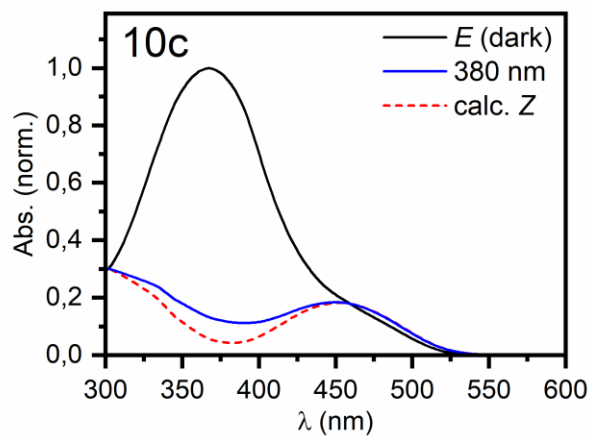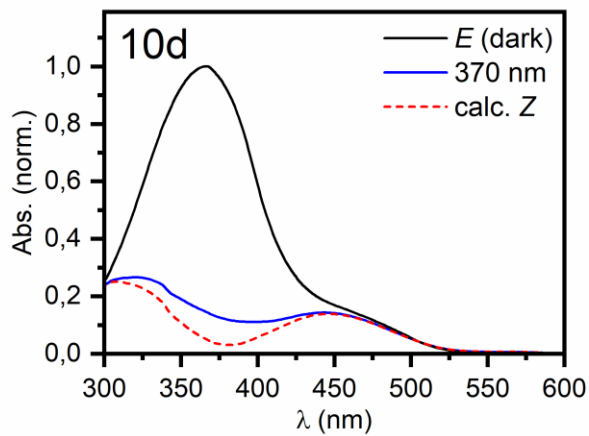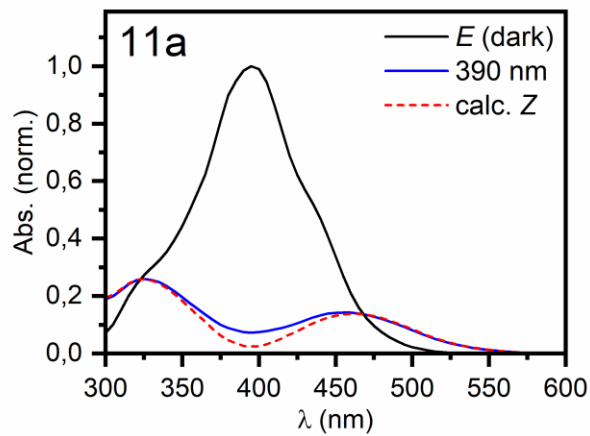

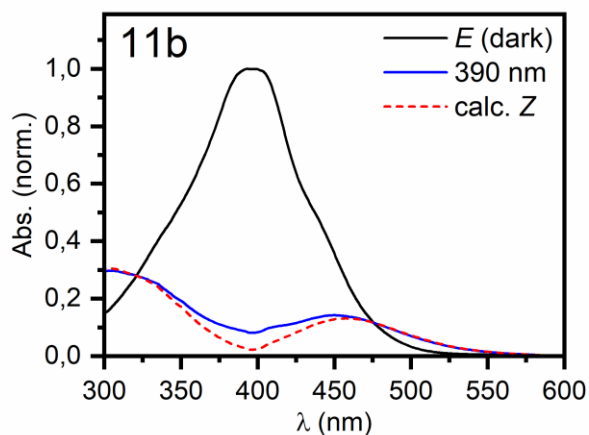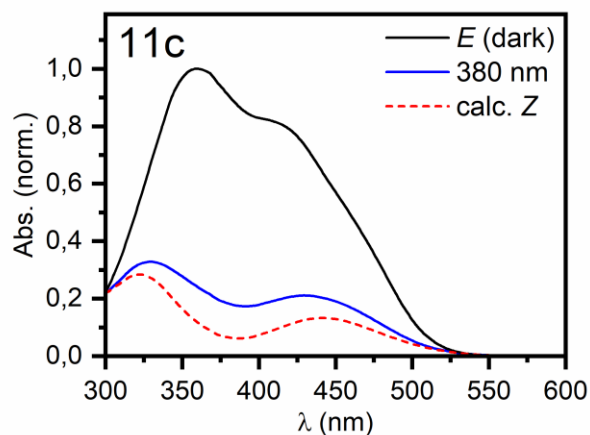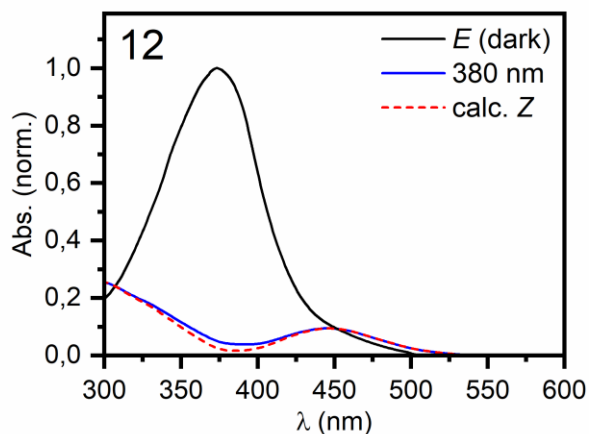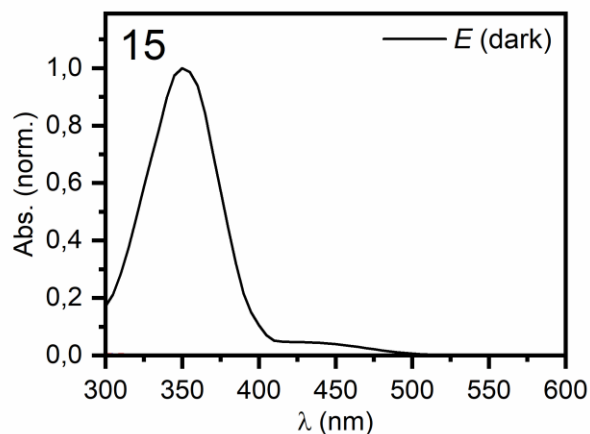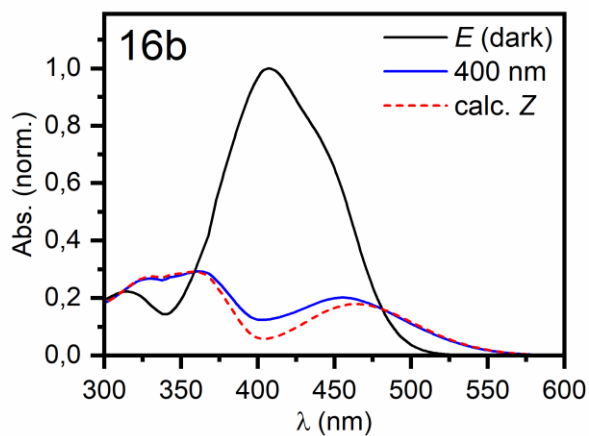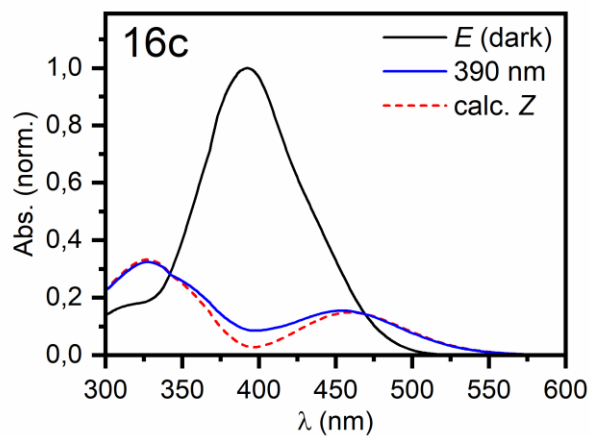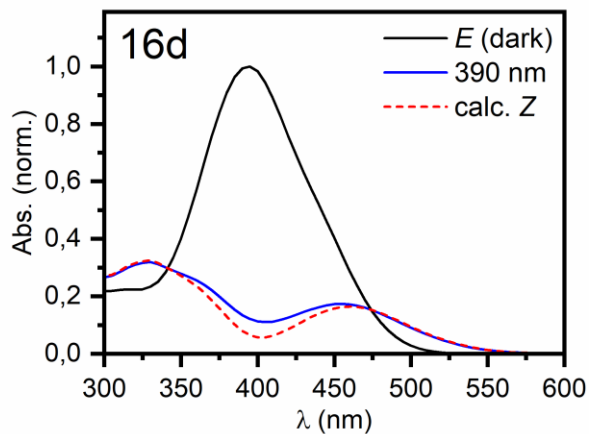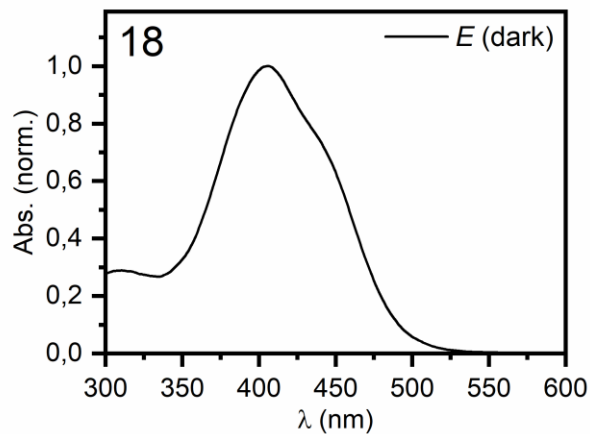

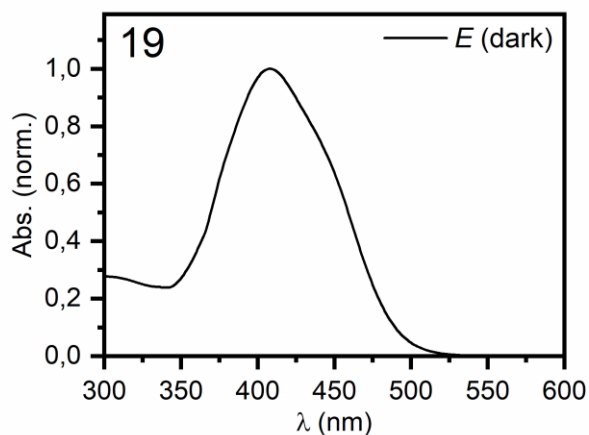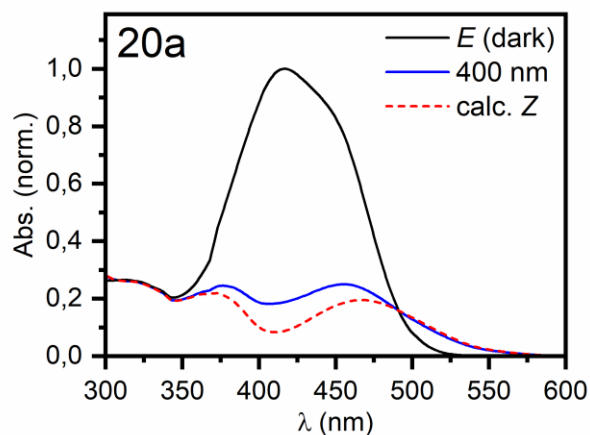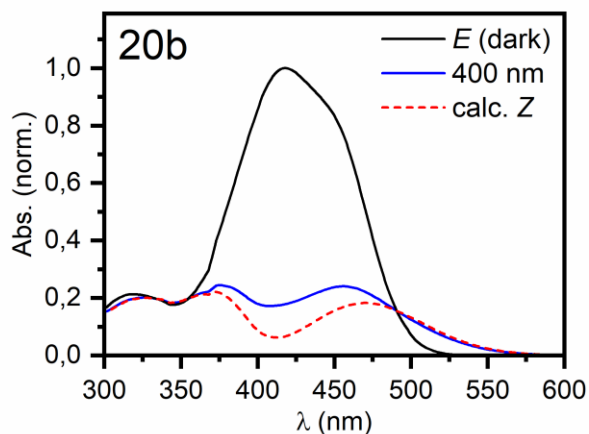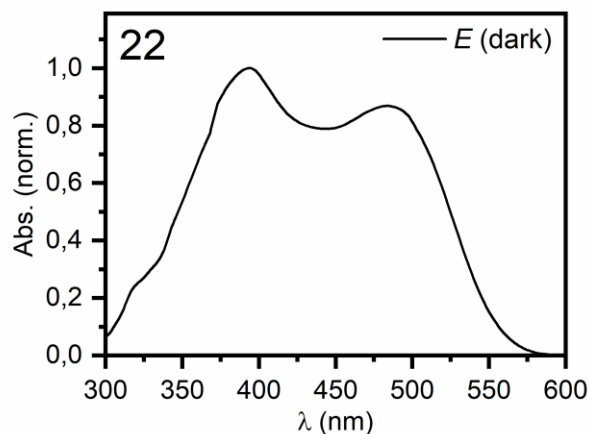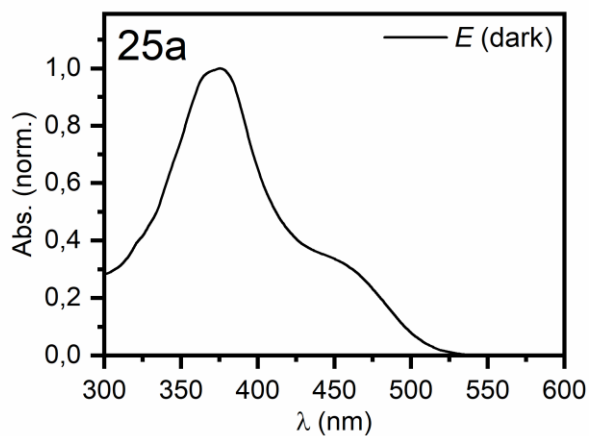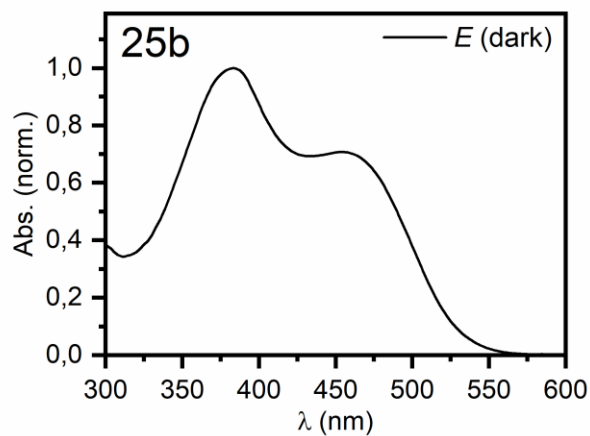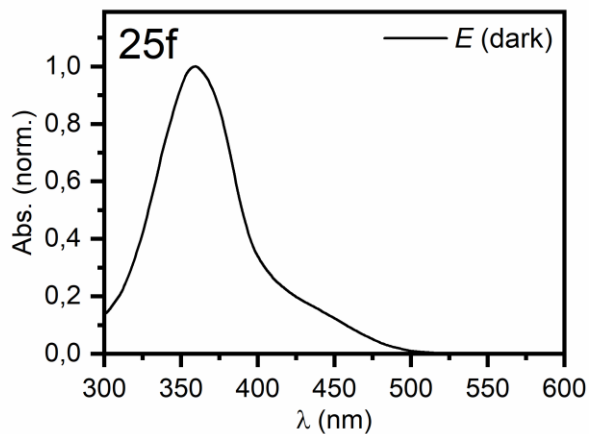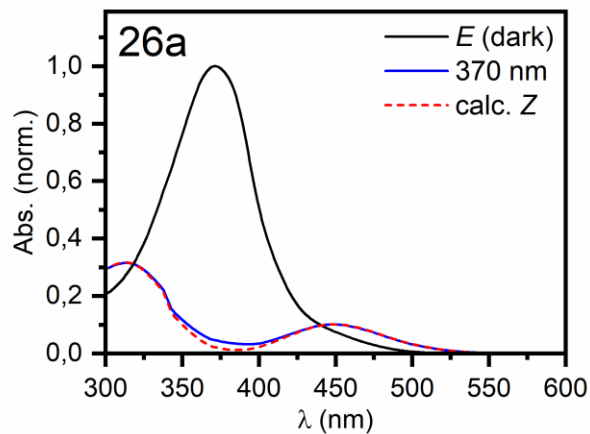

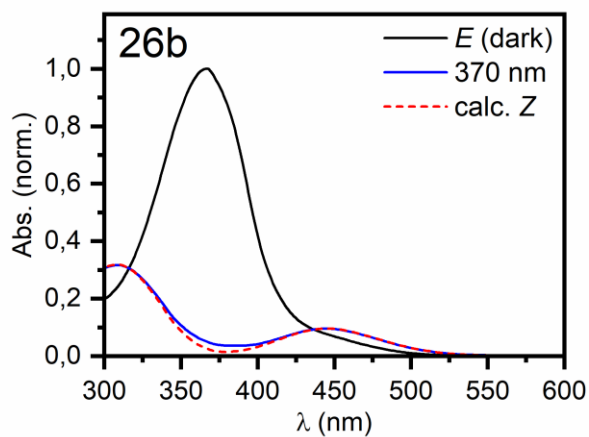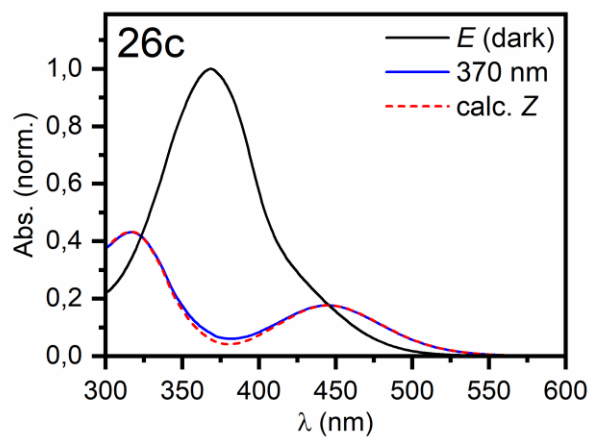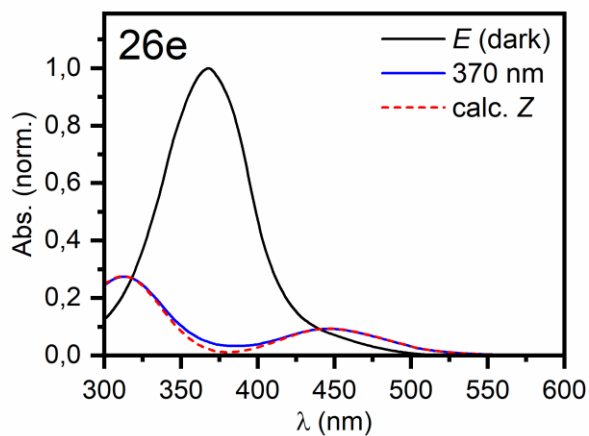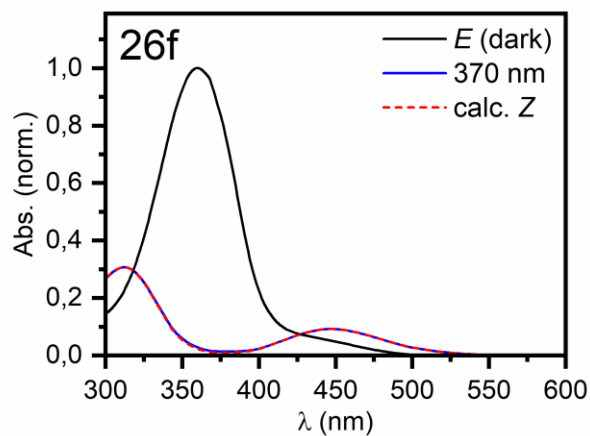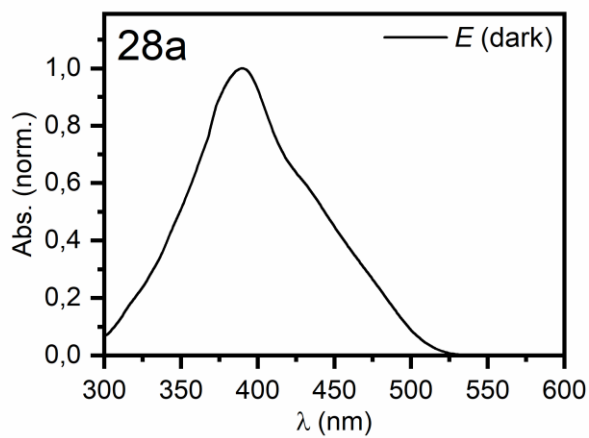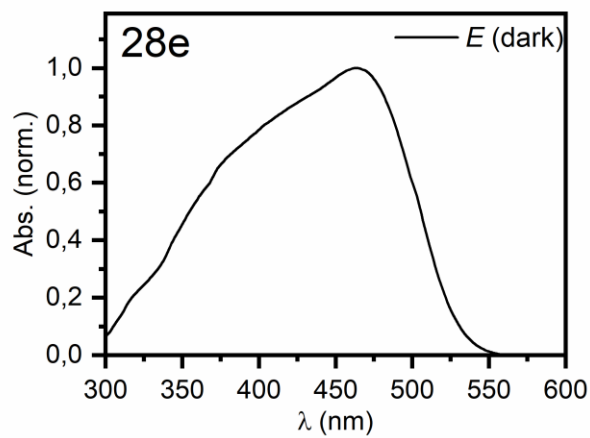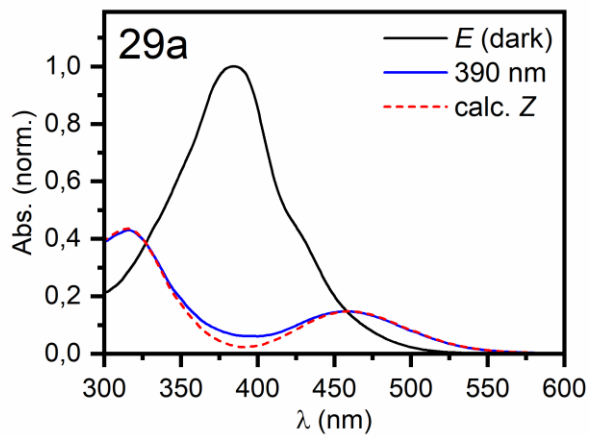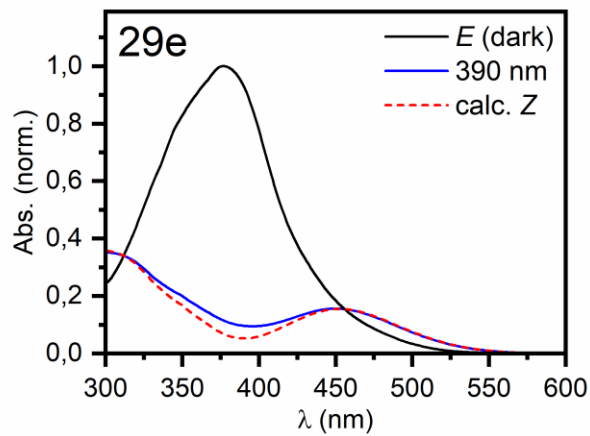

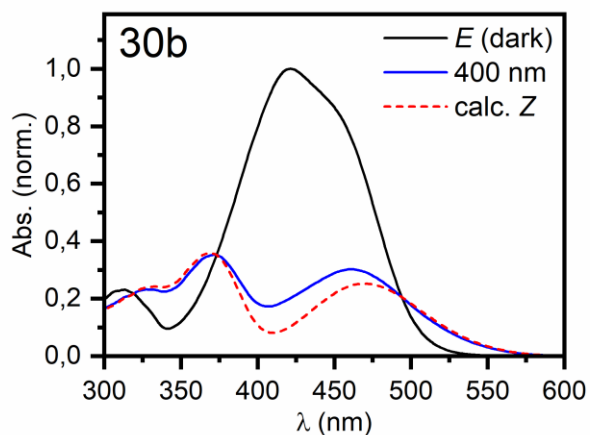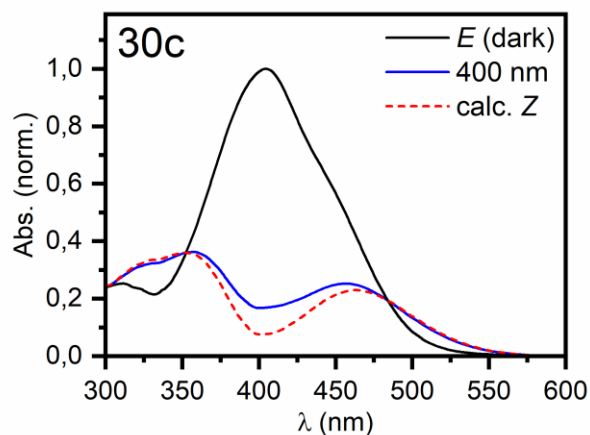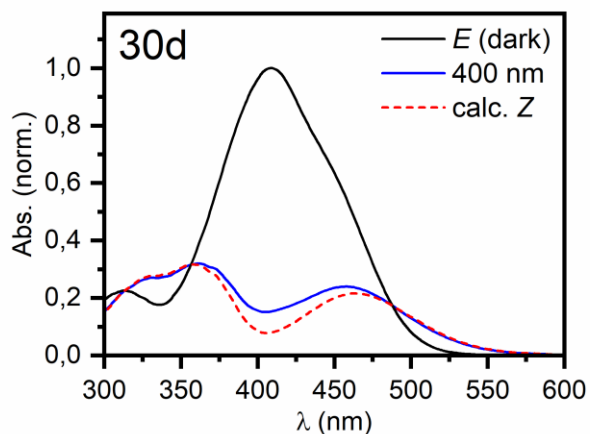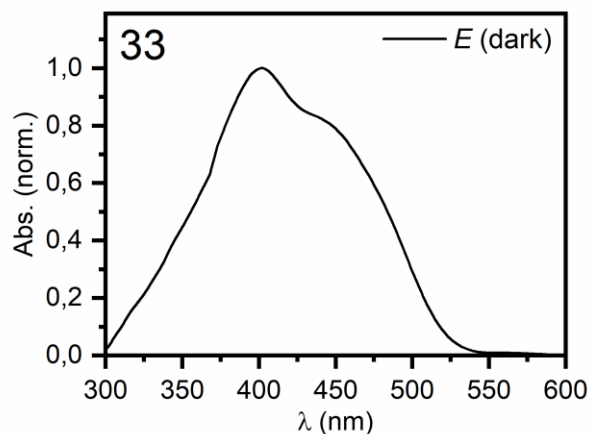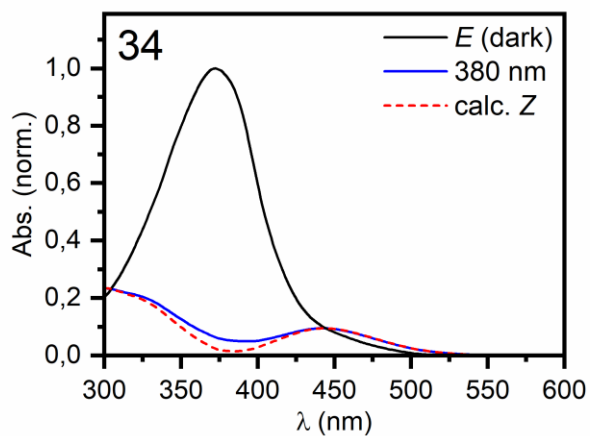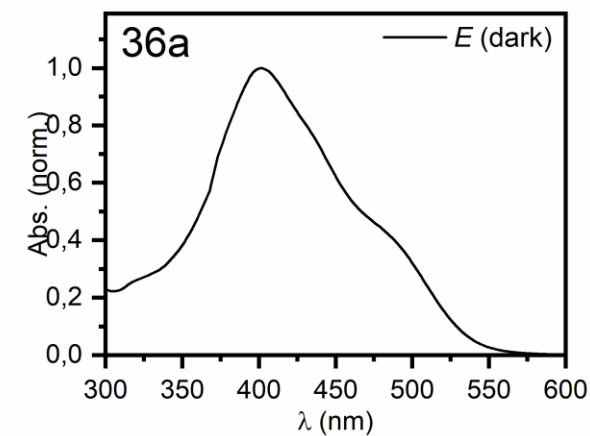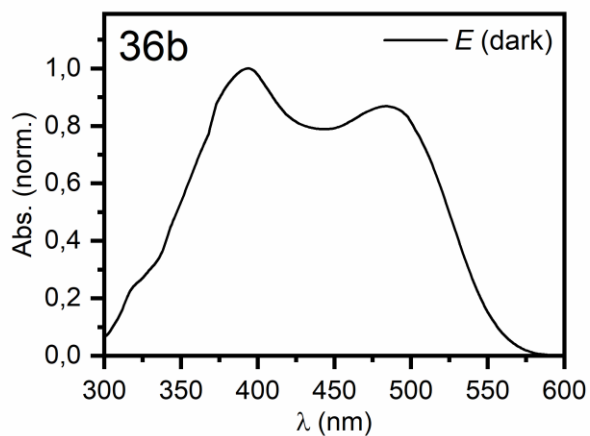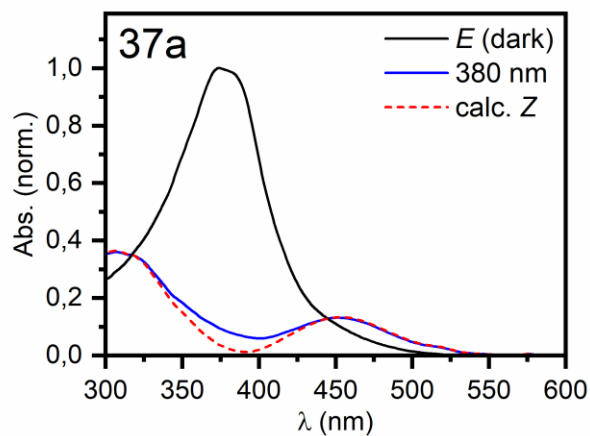

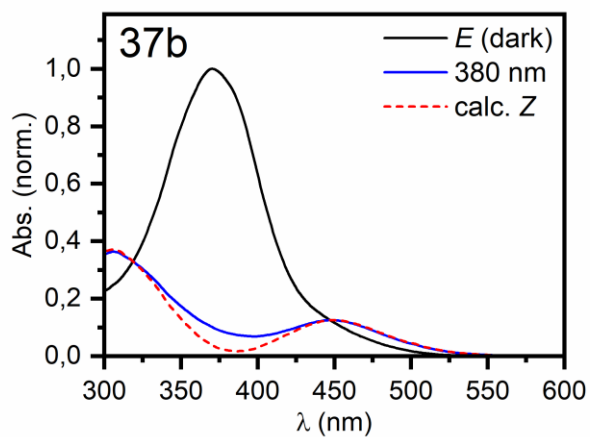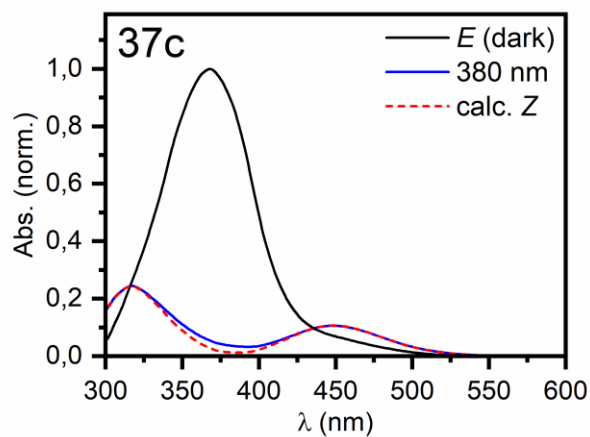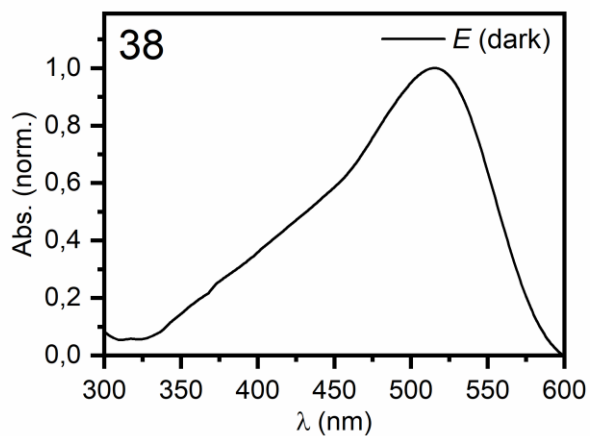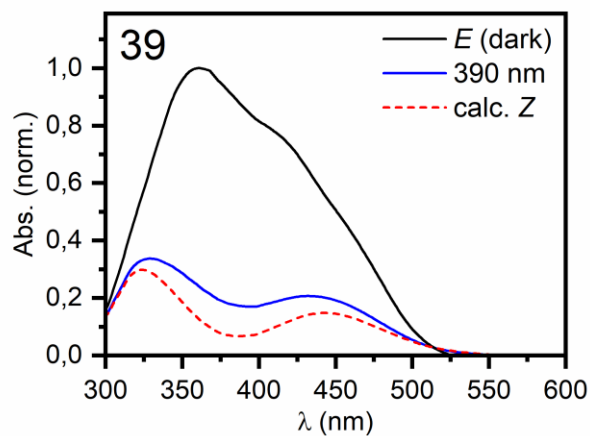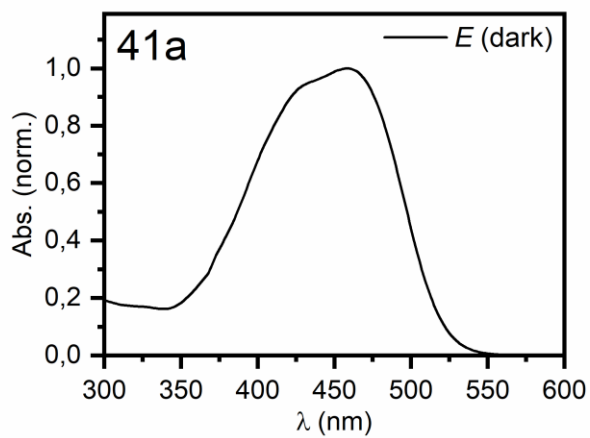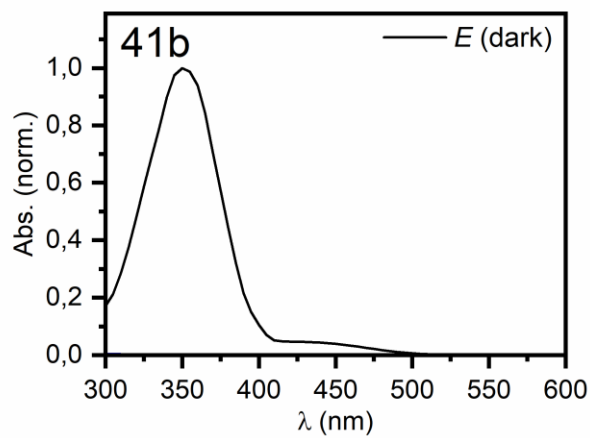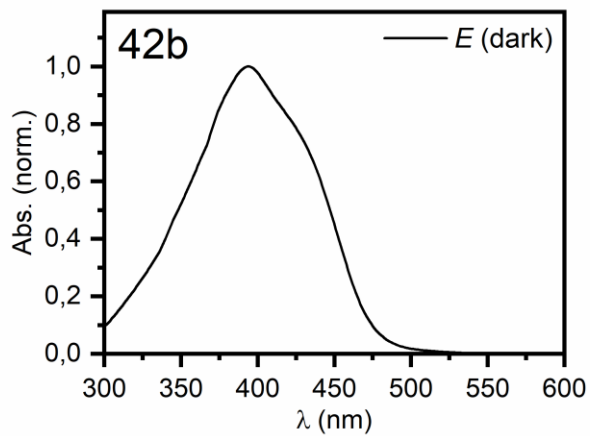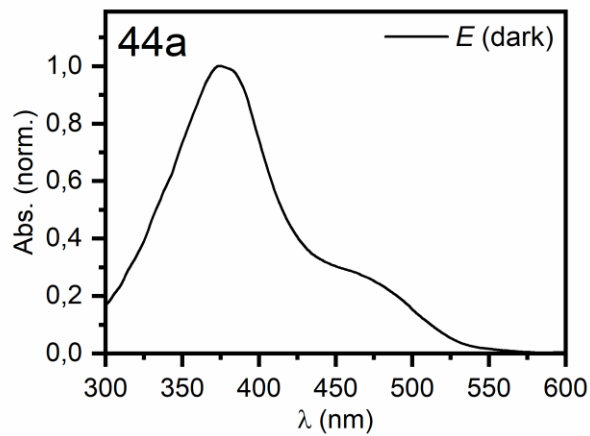

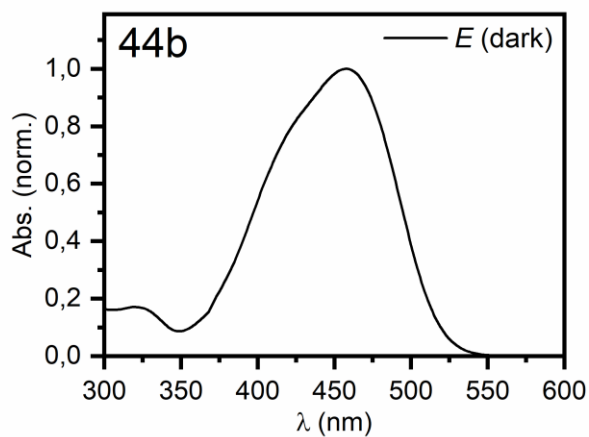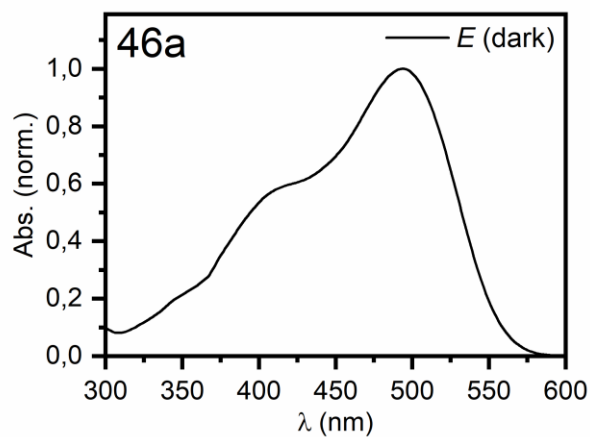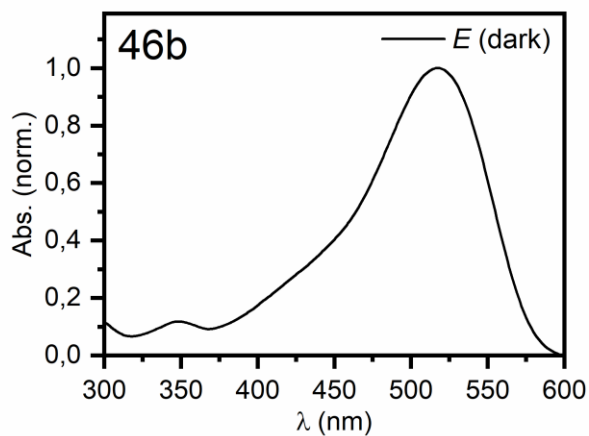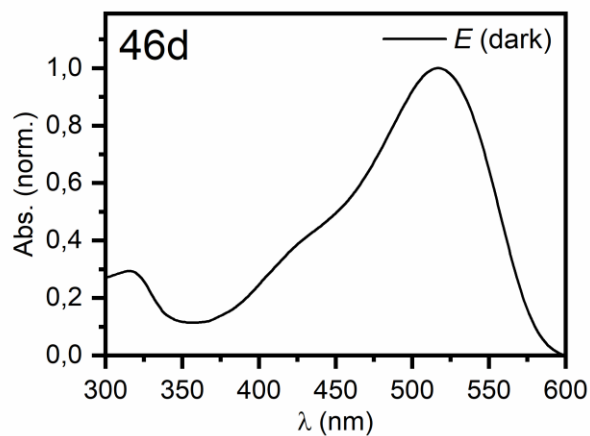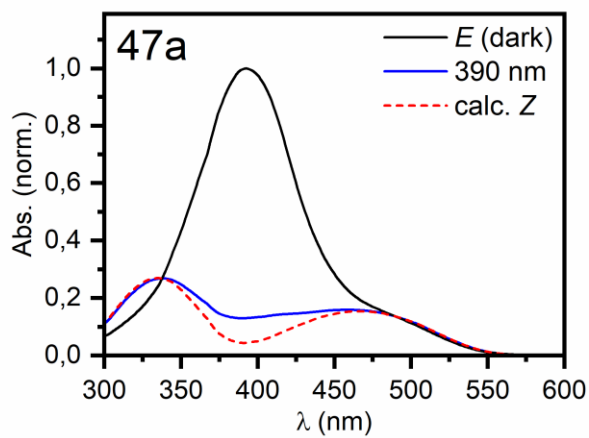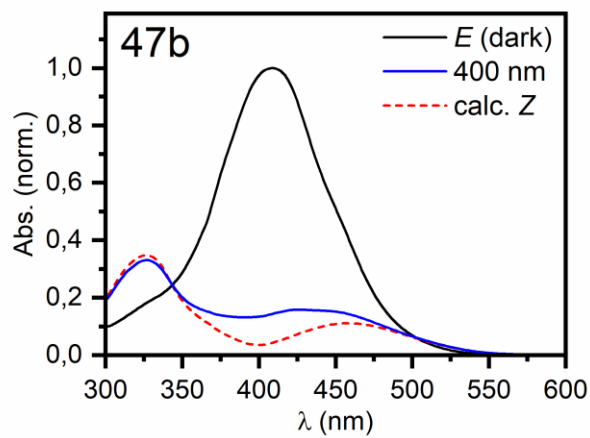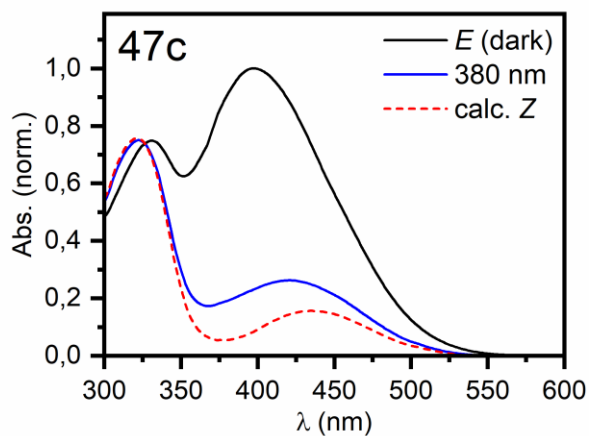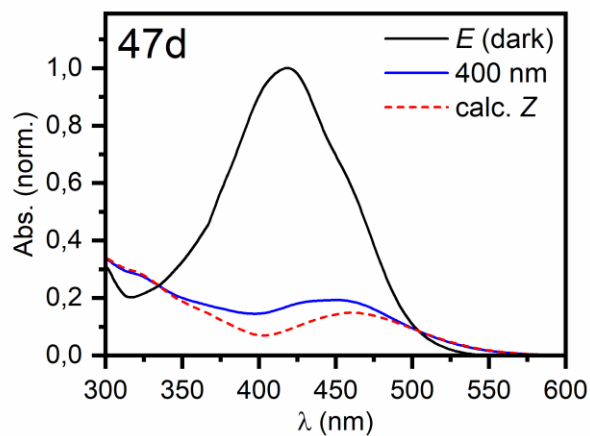



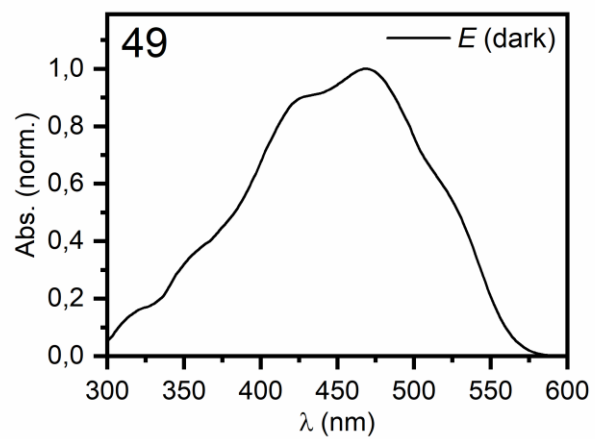

## Supplementary Note 2.

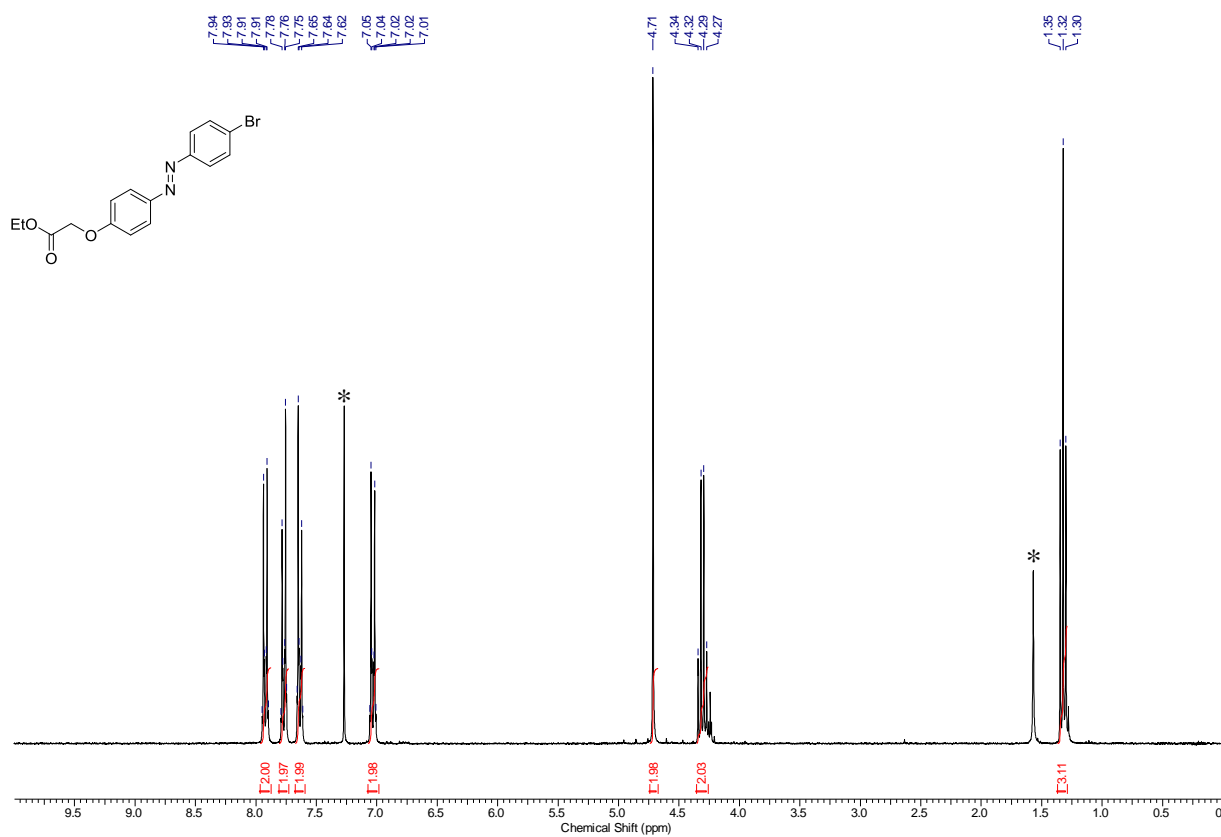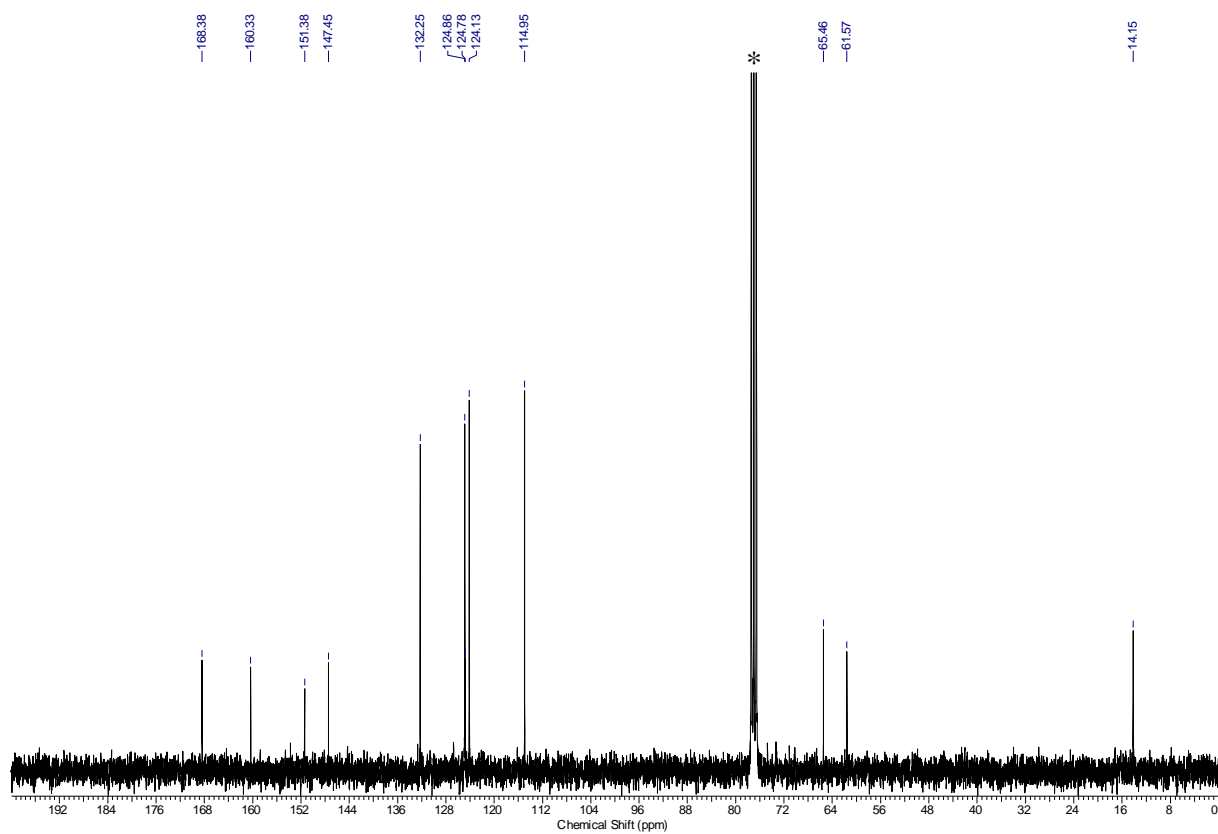

<sup>1</sup>H-NMR (300 MHz, CDCl<sub>3</sub>) and <sup>13</sup>C-NMR (75 MHz, CDCl<sub>3</sub>) spectrum of compound **1a**. \* = NMR-solvent, H<sub>2</sub>O

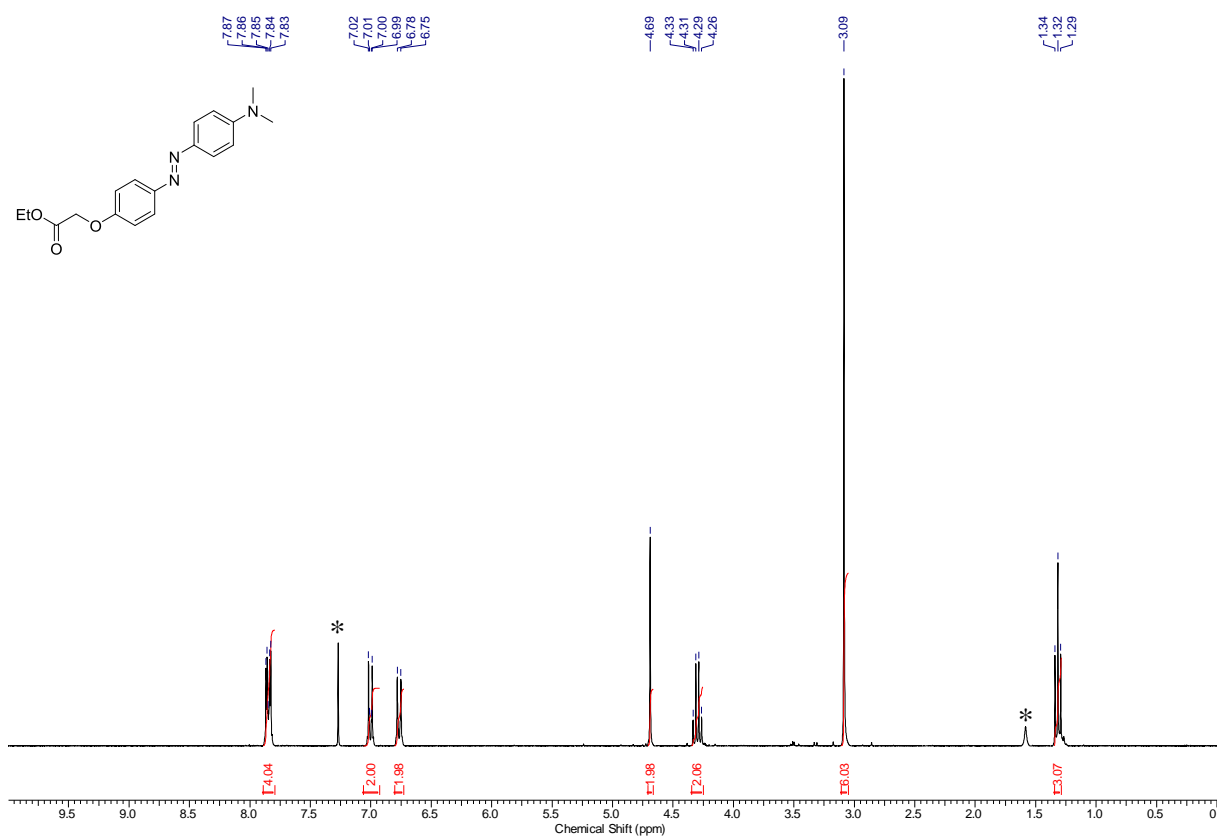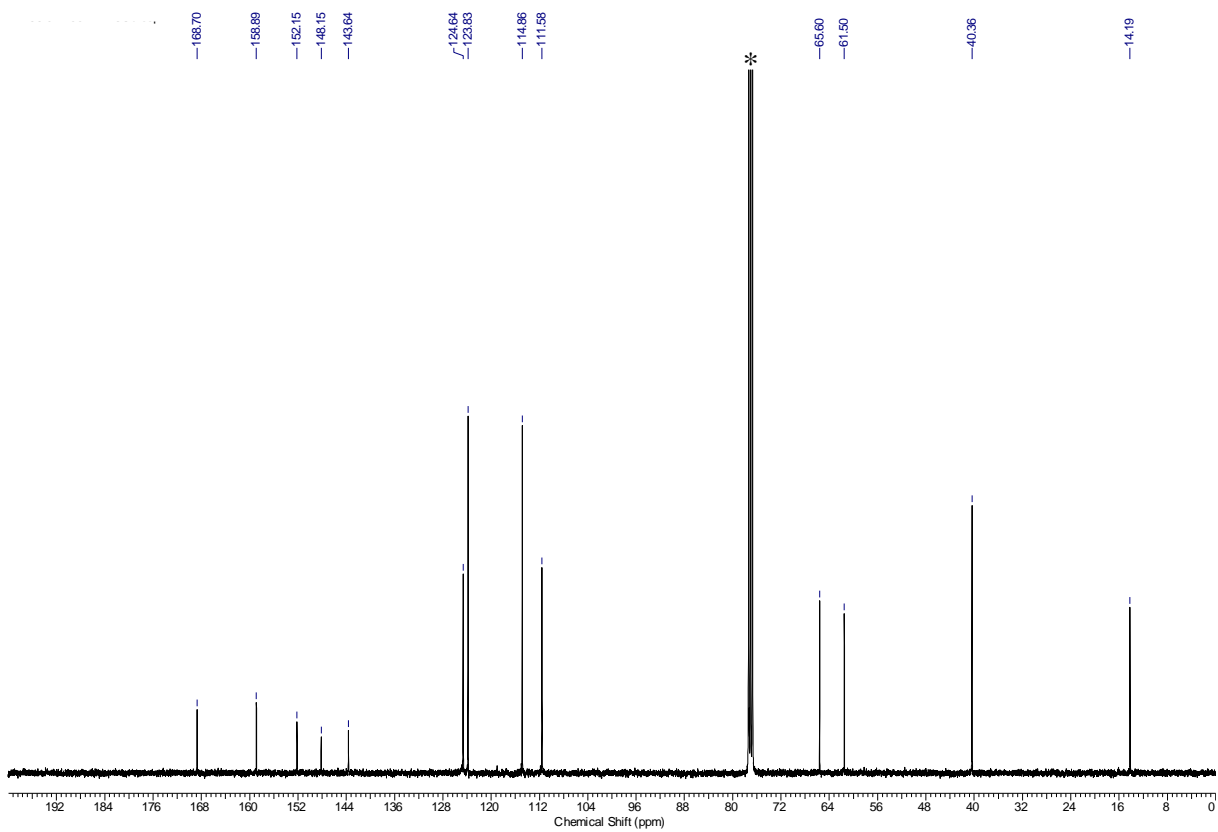

<sup>1</sup>H-NMR (300 MHz, CDCl<sub>3</sub>) and <sup>13</sup>C-NMR (101 MHz, CDCl<sub>3</sub>) spectrum of compound **1b**. \* = NMR-solvent, H<sub>2</sub>O

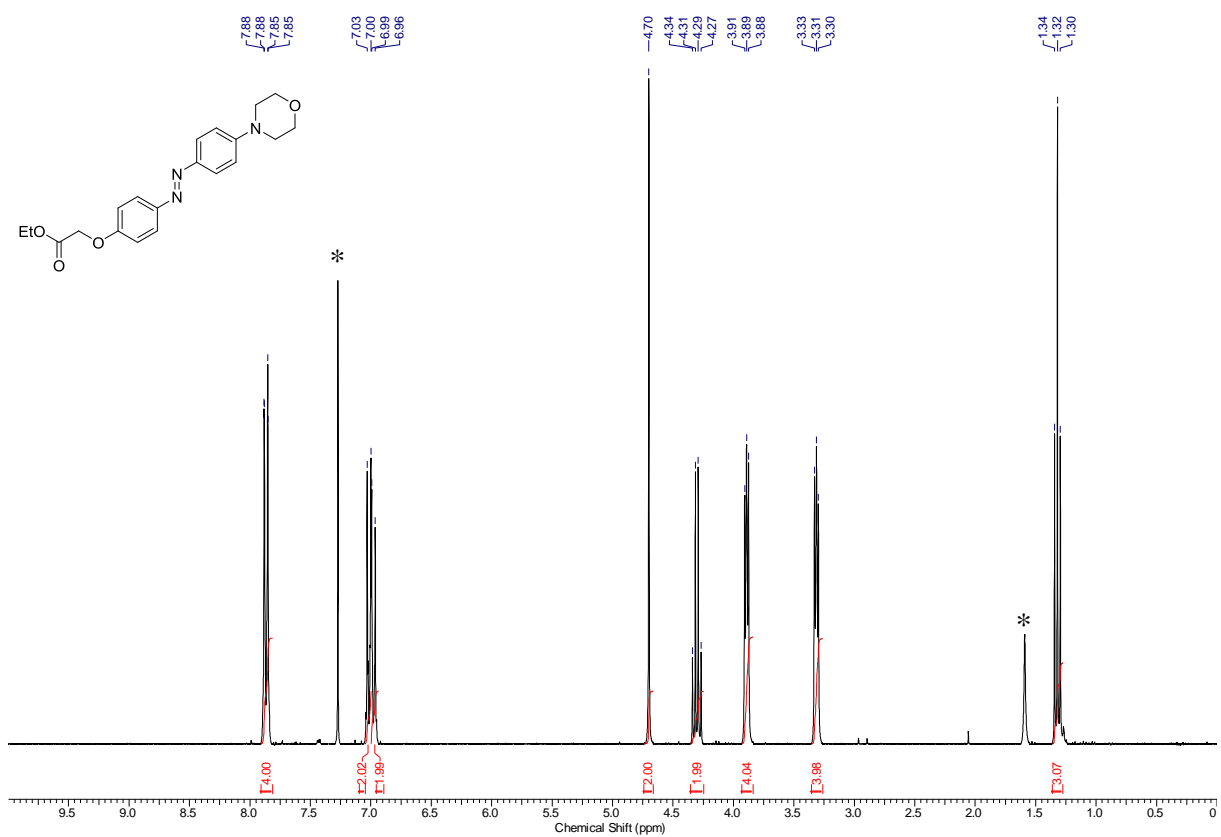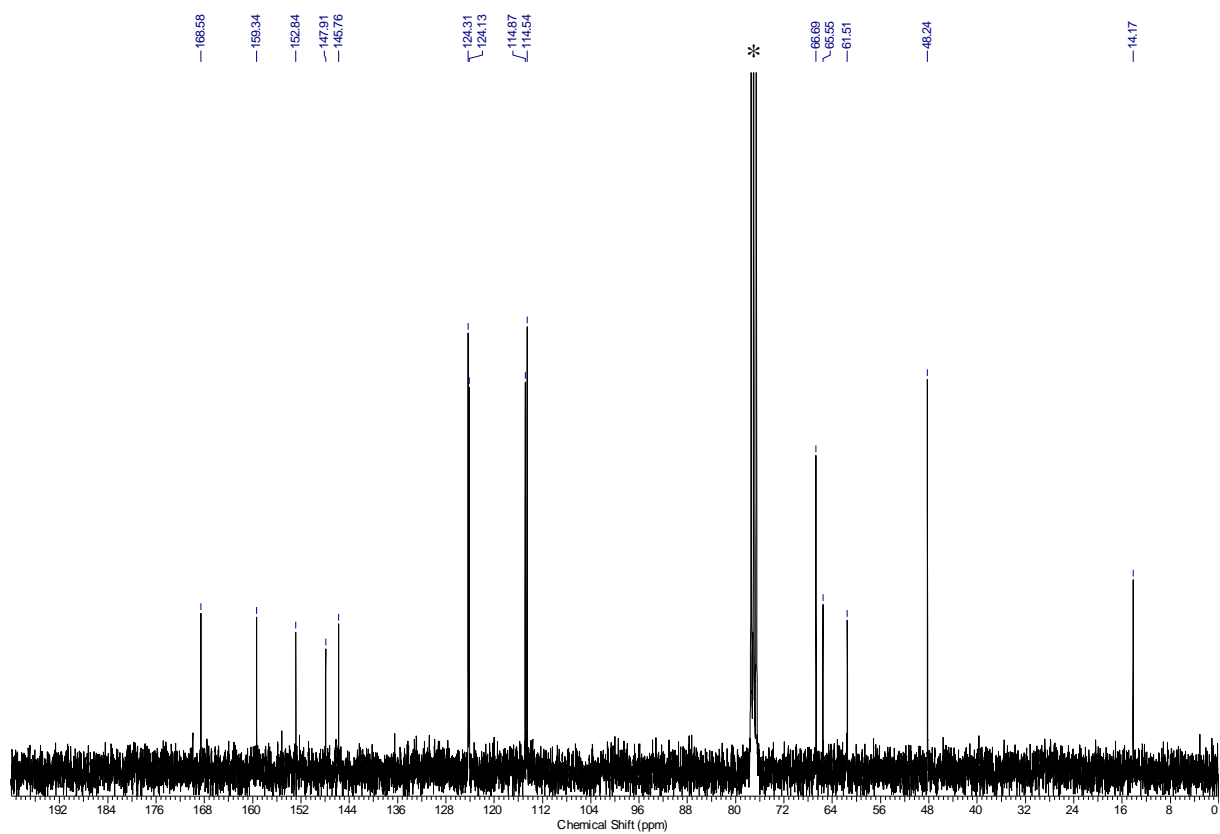

<sup>1</sup>H-NMR (300 MHz, CDCl<sub>3</sub>) and <sup>13</sup>C-NMR (75 MHz, CDCl<sub>3</sub>) spectrum of compound **1c**. \* = NMR-solvent, H<sub>2</sub>O

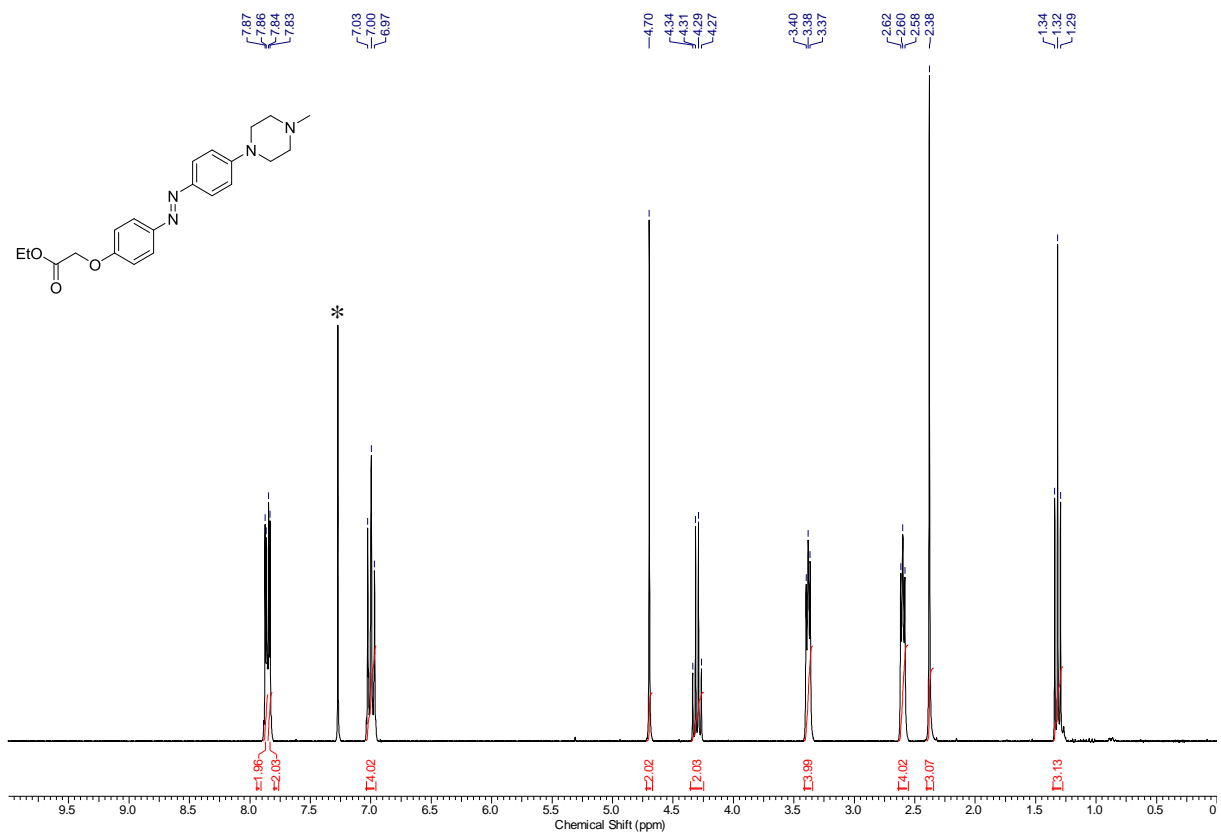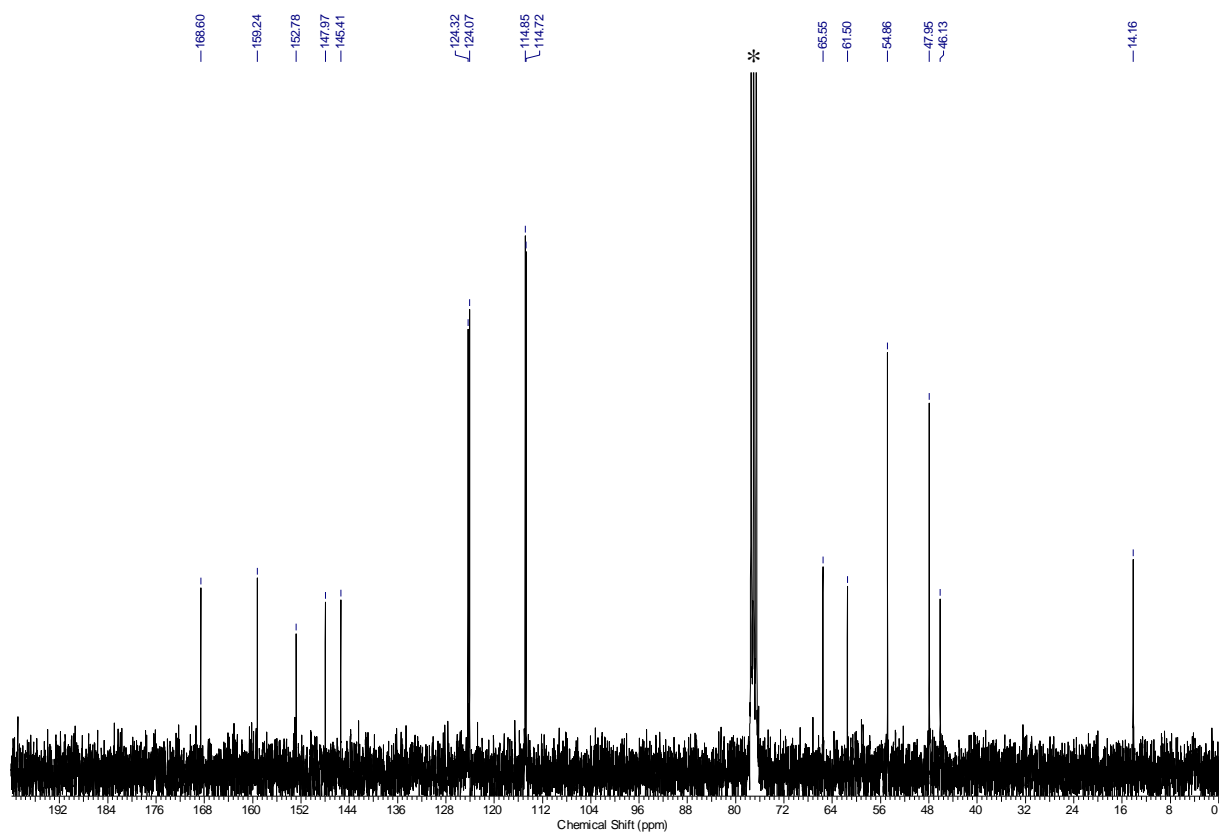

<sup>1</sup>H-NMR (300 MHz, CDCl<sub>3</sub>) and <sup>13</sup>C-NMR (75 MHz, CDCl<sub>3</sub>) spectrum of compound **1d**. \* = NMR-solvent

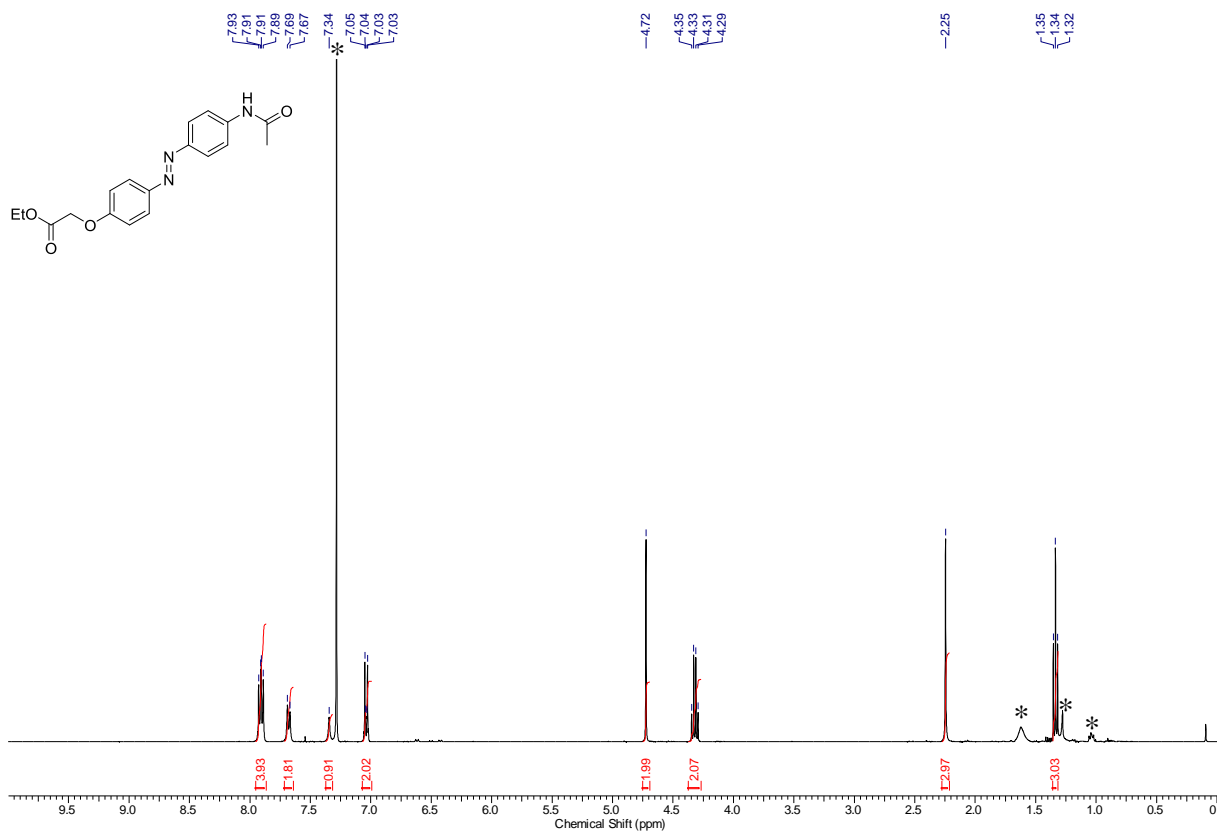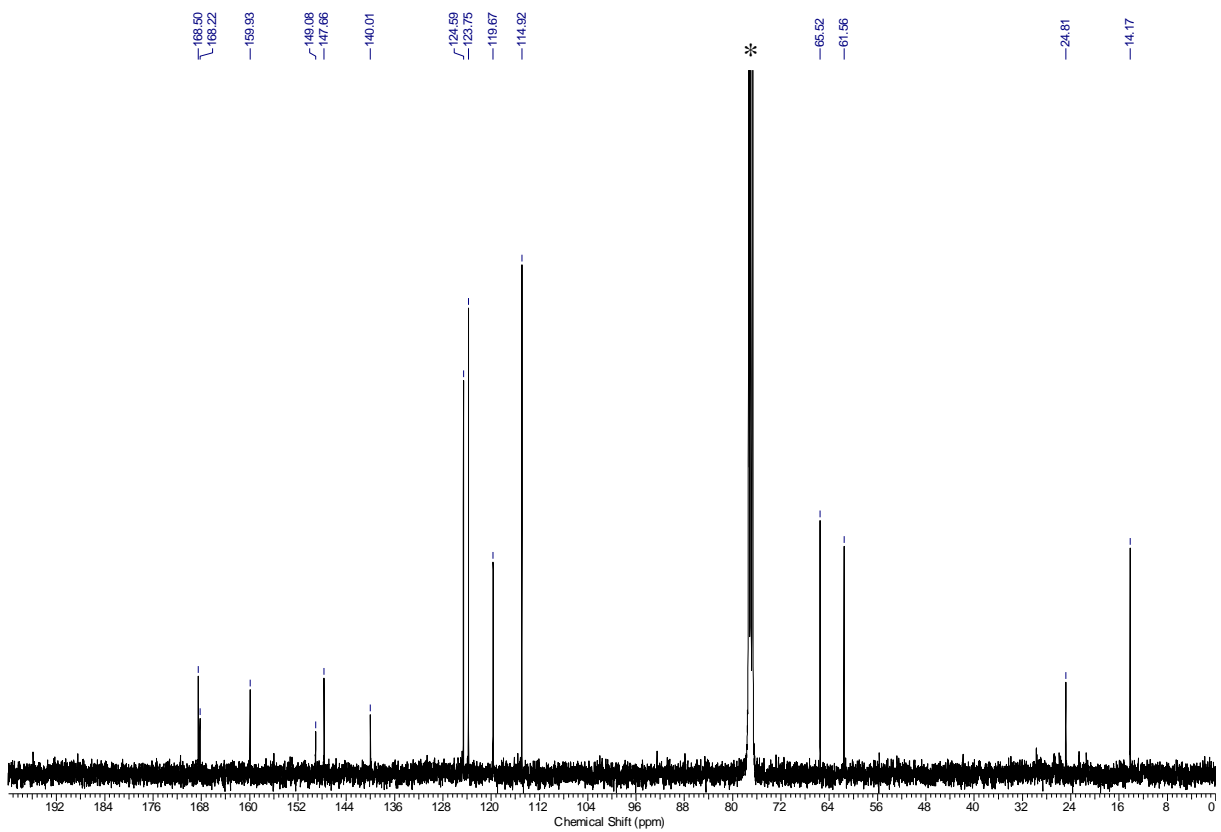

$^1\text{H-NMR}$  (400 MHz,  $\text{CDCl}_3$ ) and  $^{13}\text{C-NMR}$  (101 MHz,  $\text{CDCl}_3$ ) spectrum of compound **1e**. \* = NMR-solvent,  $\text{H}_2\text{O}$ , grease

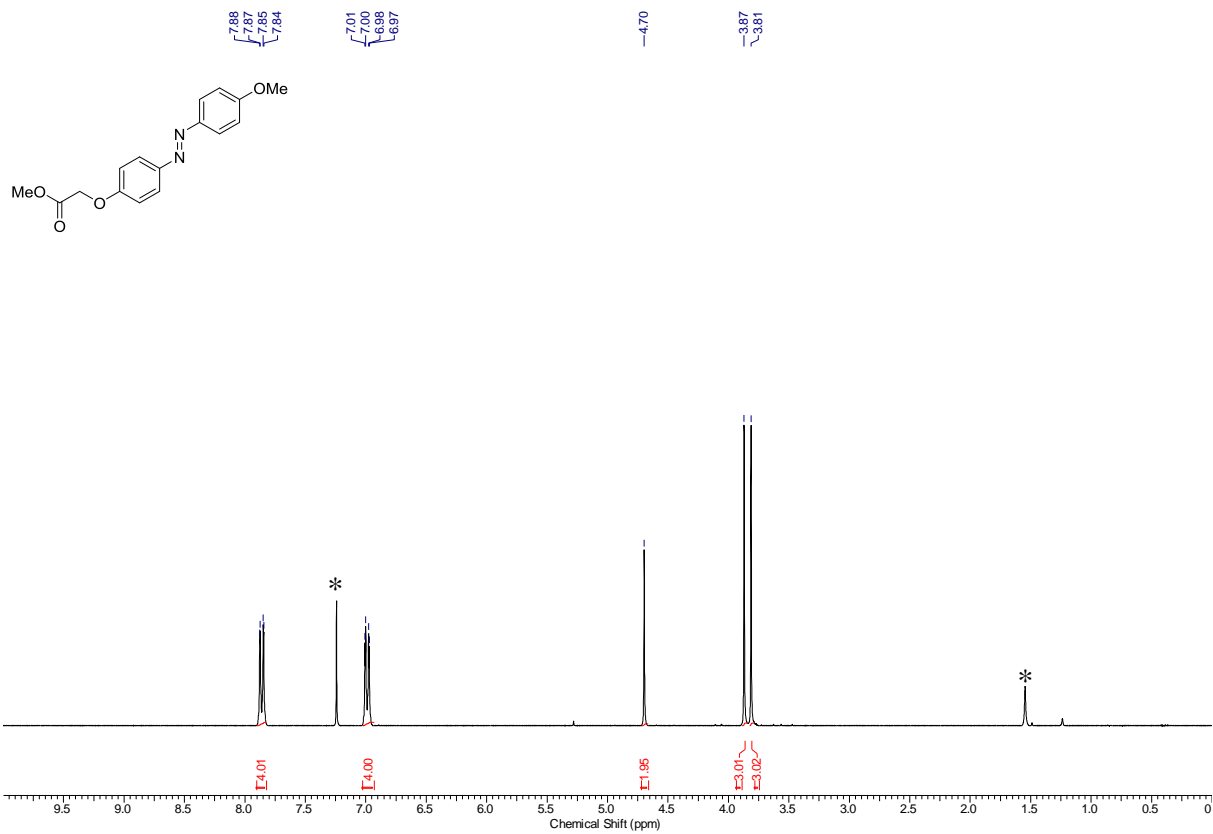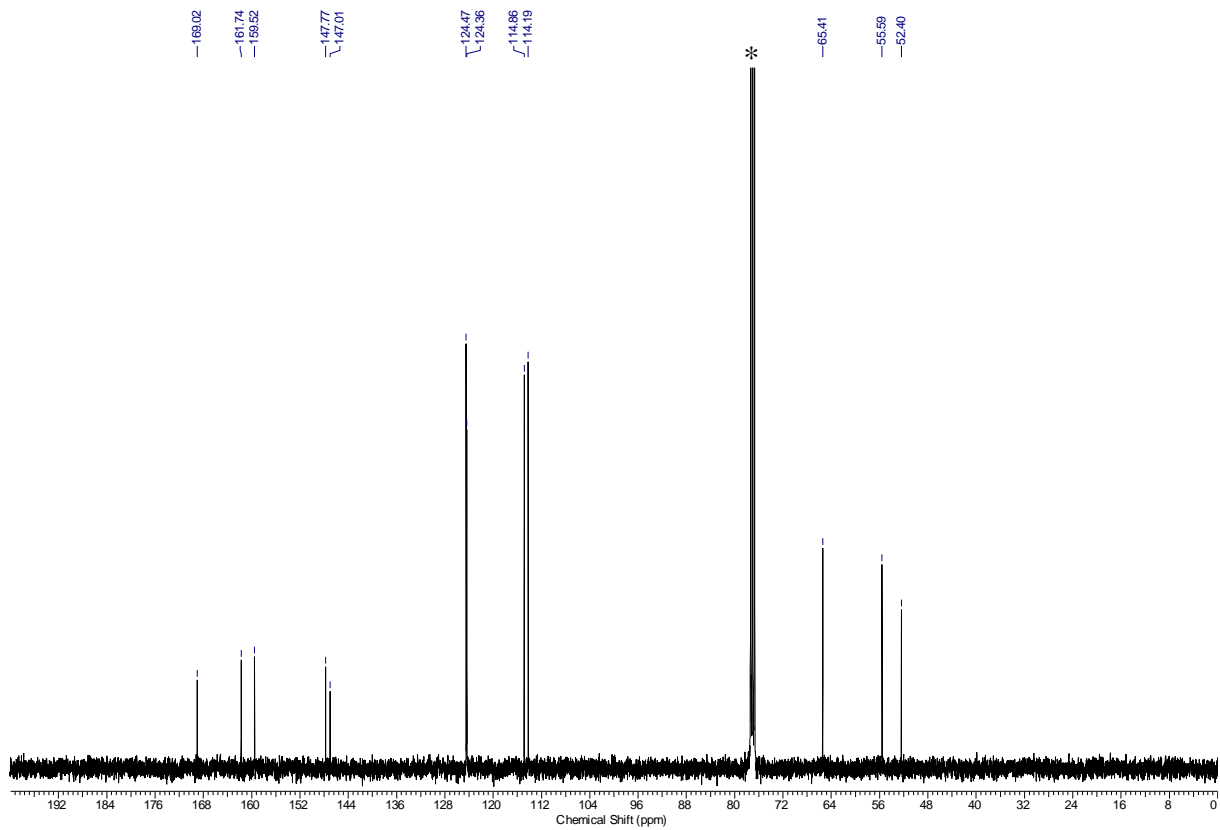

<sup>1</sup>H-NMR (300 MHz, CDCl<sub>3</sub>) and <sup>13</sup>C-NMR (101 MHz, CDCl<sub>3</sub>) spectrum of compound **1f**. \* = NMR-solvent, H<sub>2</sub>O

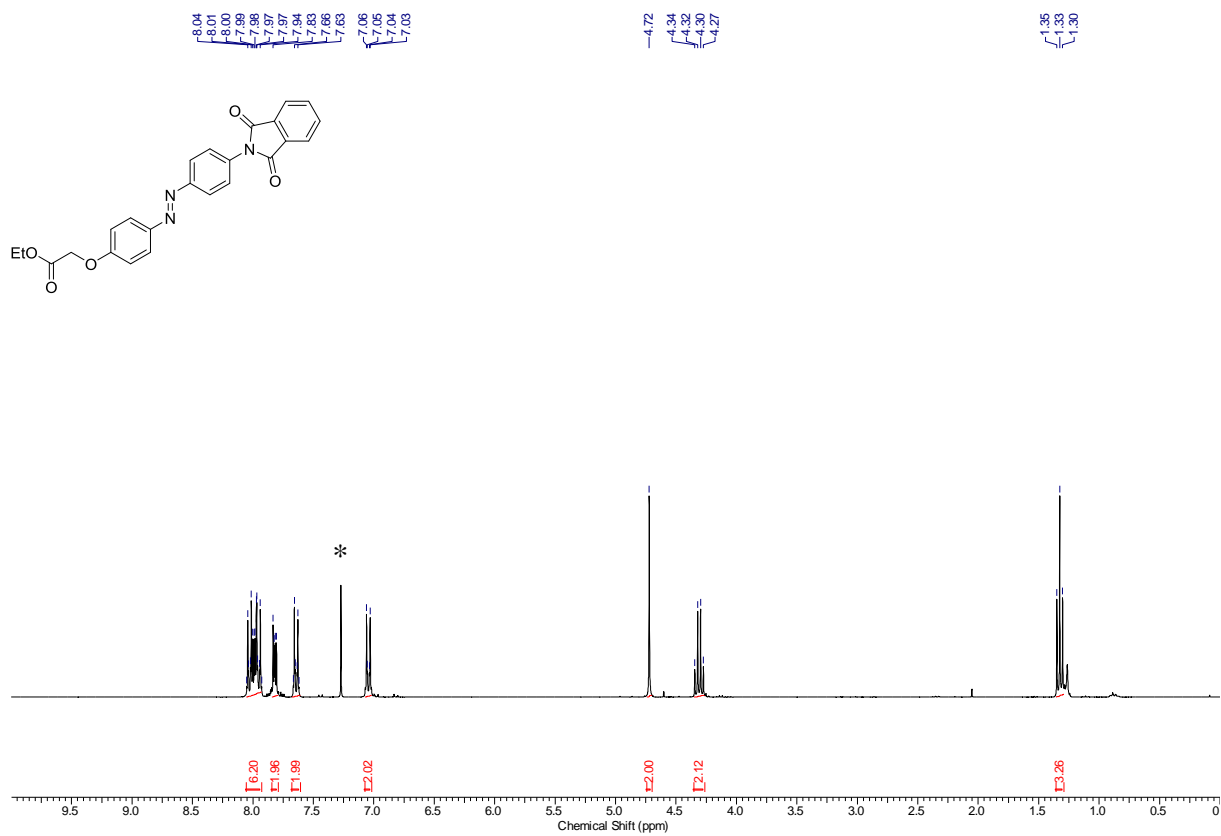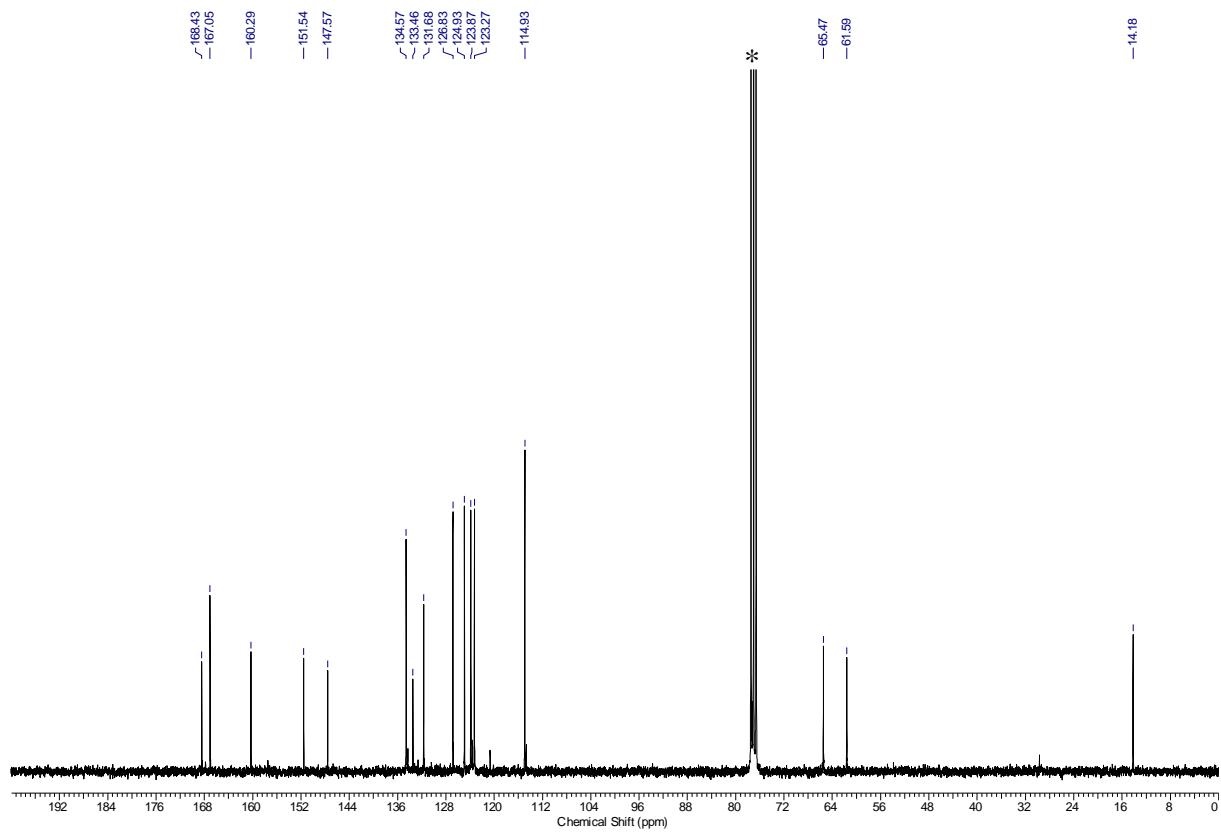

$^1\text{H-NMR}$  (300 MHz,  $\text{CDCl}_3$ ) and  $^{13}\text{C-NMR}$  (75 MHz,  $\text{CDCl}_3$ ) spectrum of compound **1g**. \* = NMR-solvent



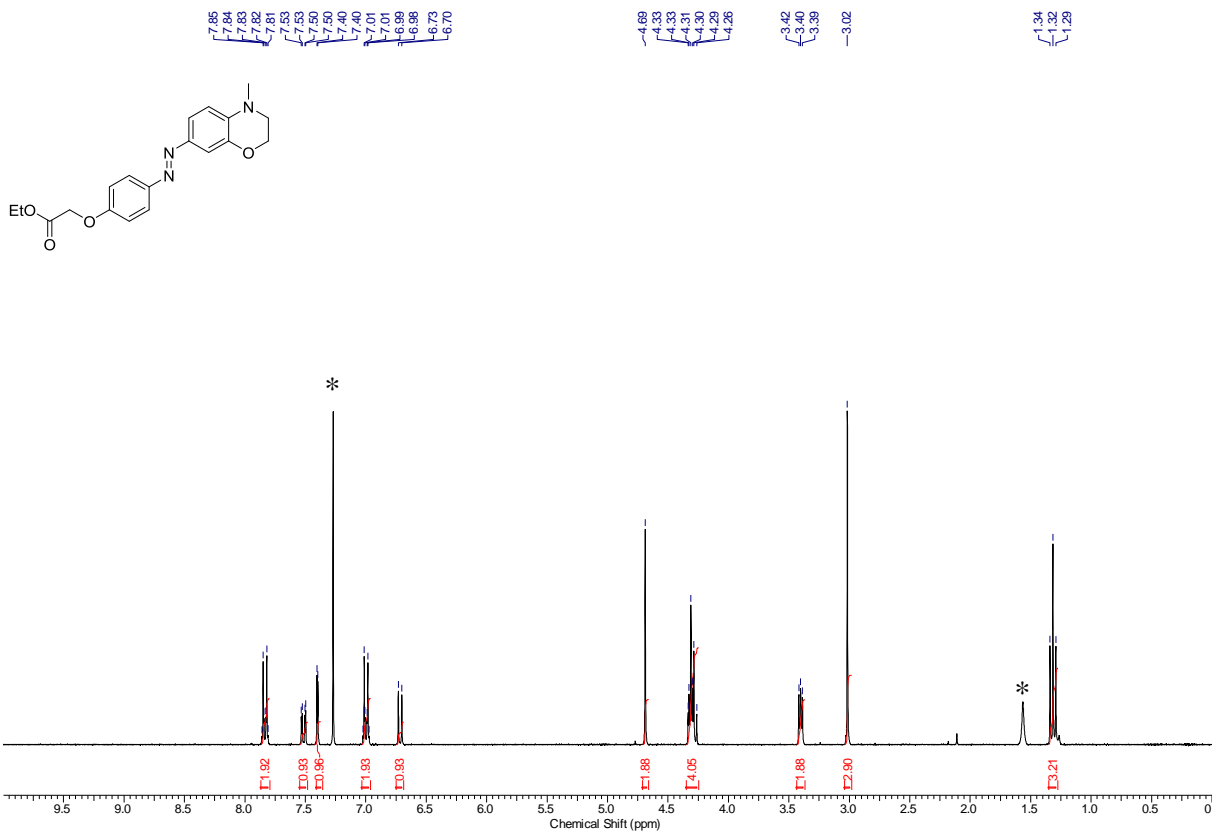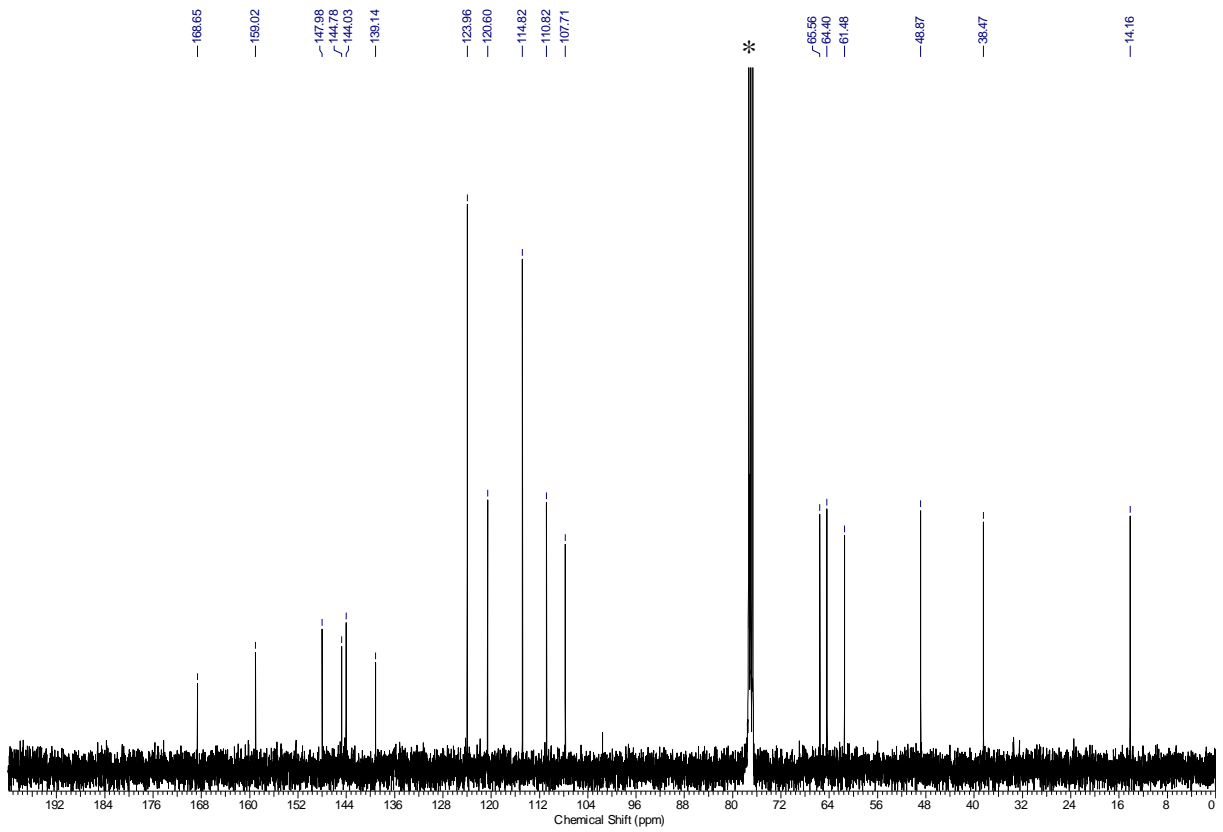

$^1\text{H-NMR}$  (300 MHz,  $\text{CDCl}_3$ ) and  $^{13}\text{C-NMR}$  (101 MHz,  $\text{CDCl}_3$ ) spectrum of compound **2a**. \* = NMR-solvent,  $\text{H}_2\text{O}$

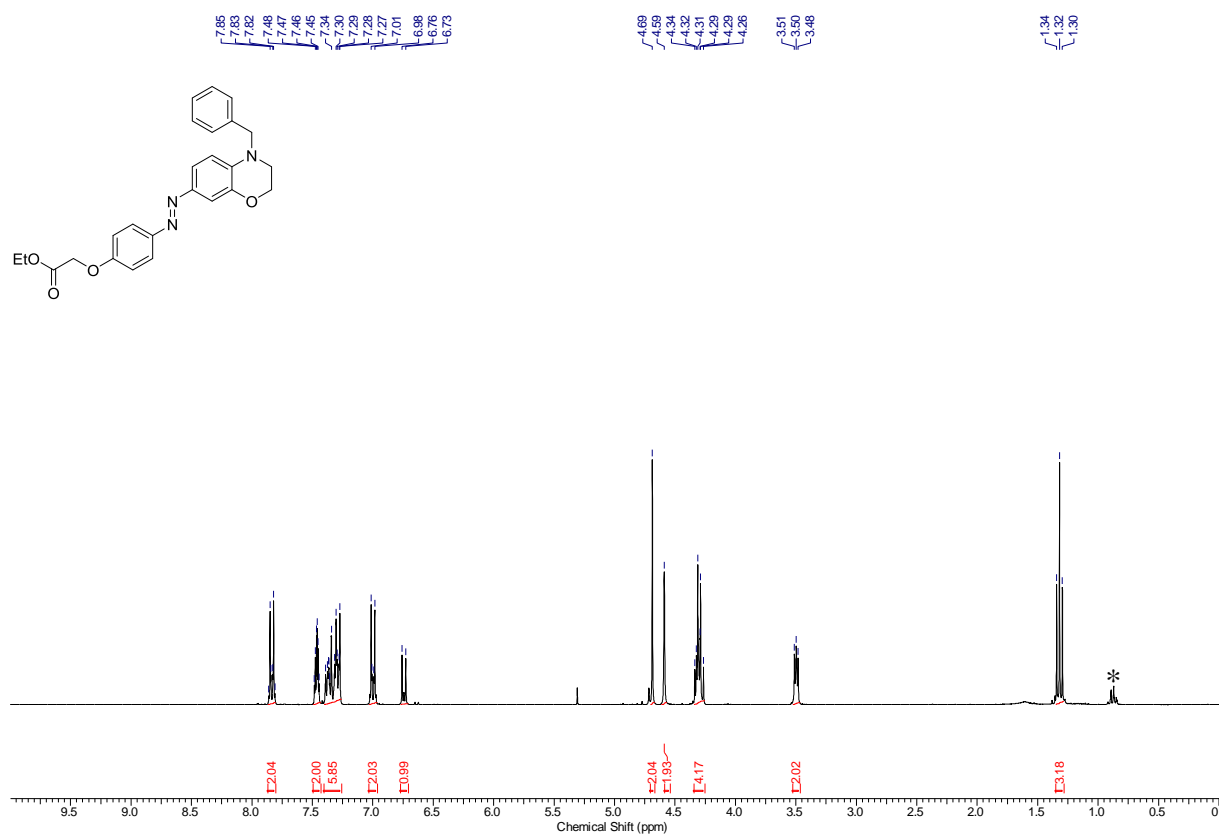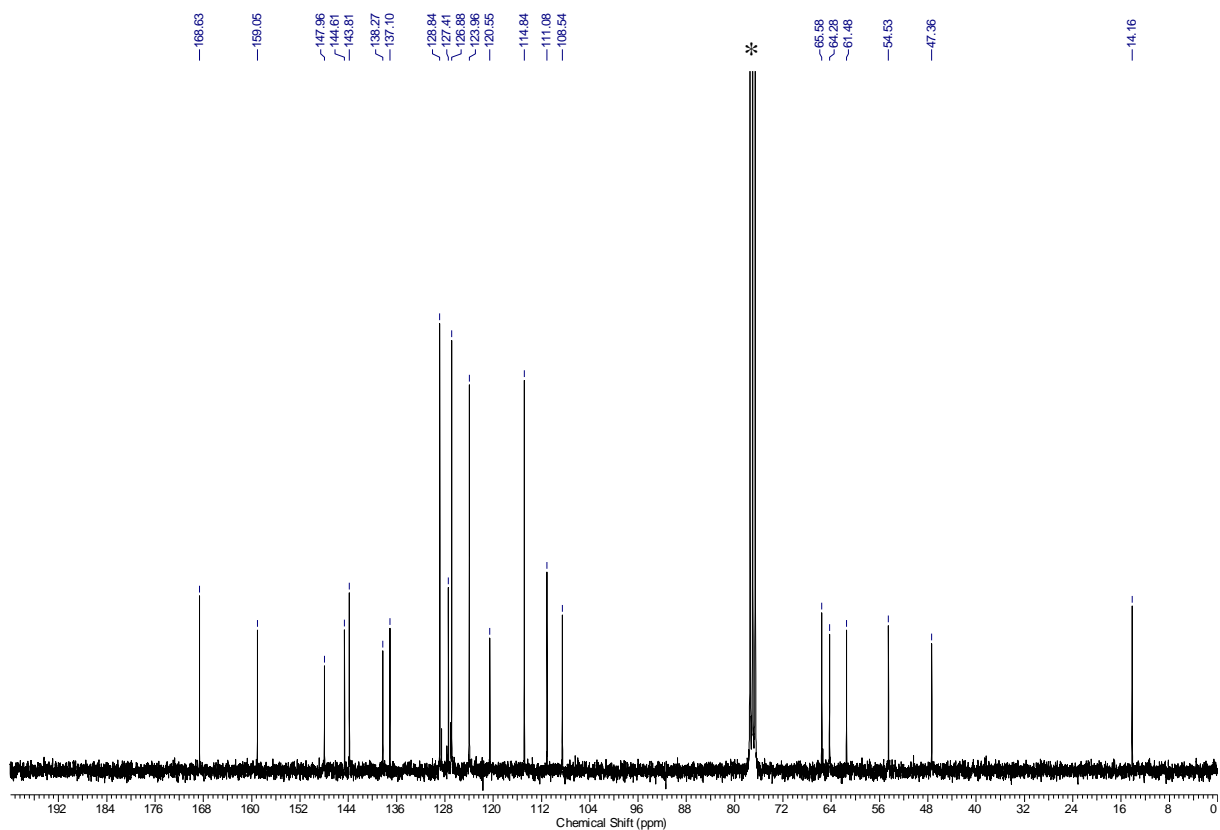

$^1\text{H-NMR}$  (300 MHz,  $\text{CDCl}_3$ ) and  $^{13}\text{C-NMR}$  (75 MHz,  $\text{CDCl}_3$ ) spectrum of compound **2b**. \* = NMR-solvent, grease

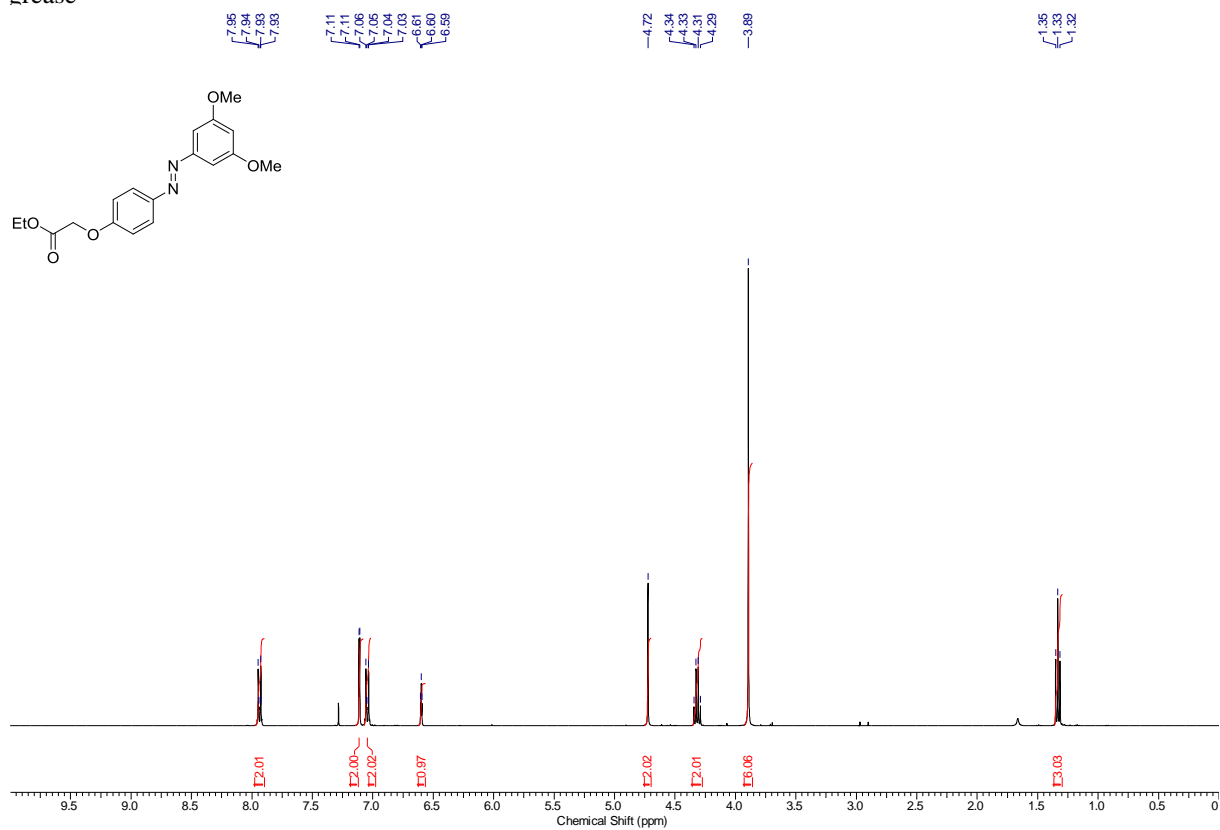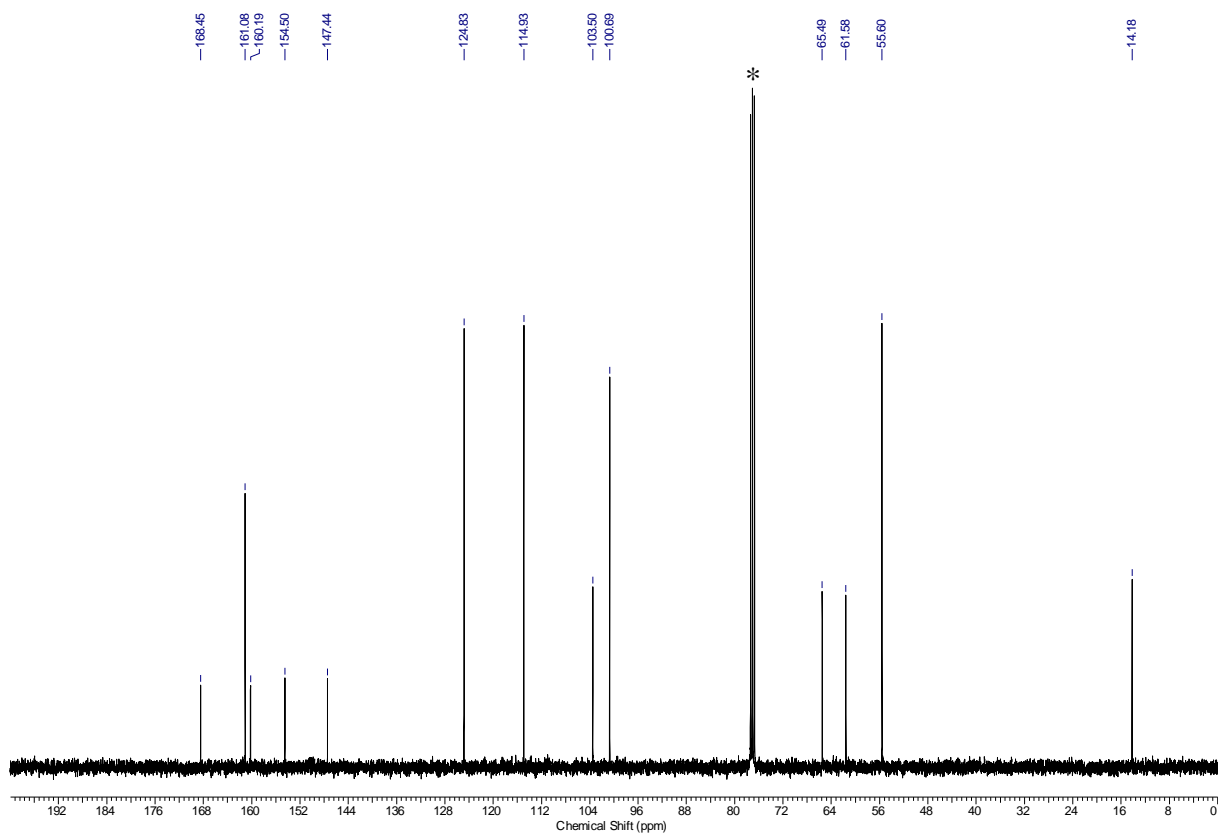

$^1\text{H-NMR}$  (400 MHz,  $\text{CDCl}_3$ ) and  $^{13}\text{C-NMR}$  (101 MHz,  $\text{CDCl}_3$ ) spectrum of compound **3**. \* = NMR-solvent,  $\text{H}_2\text{O}$

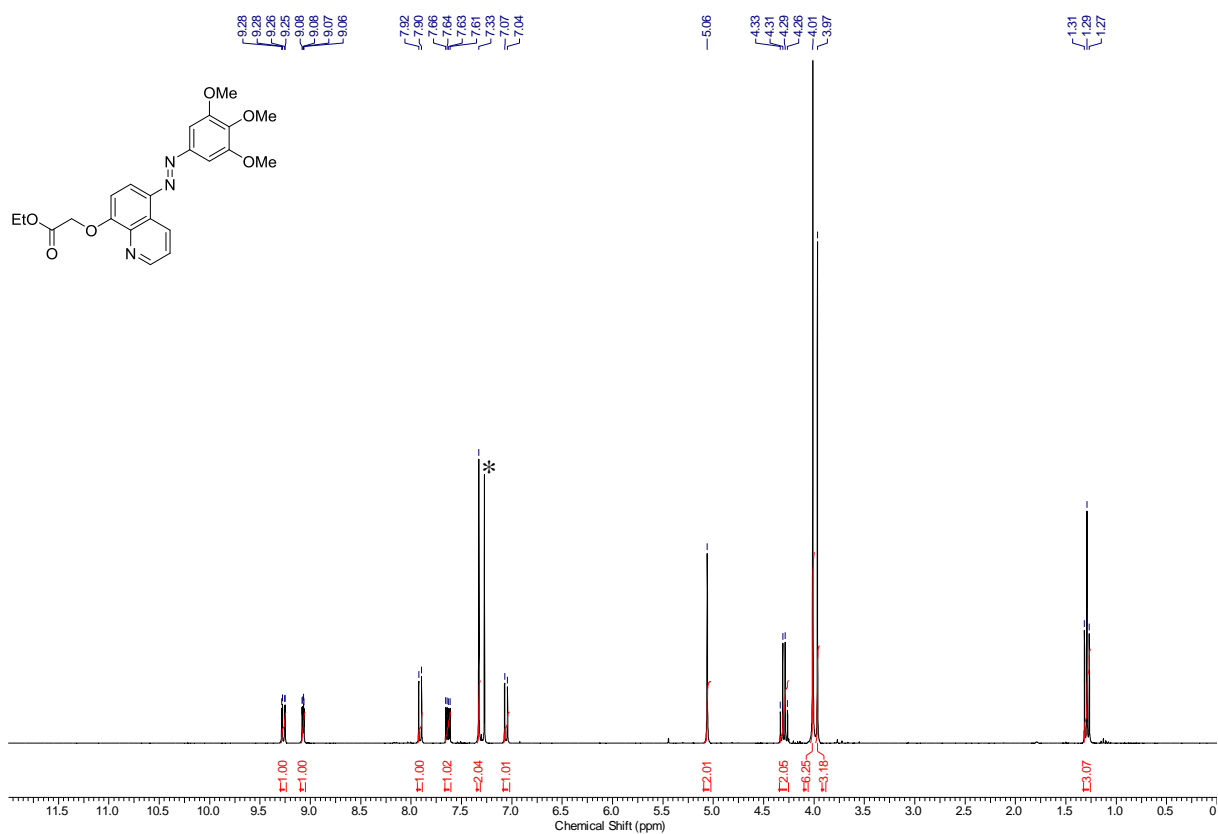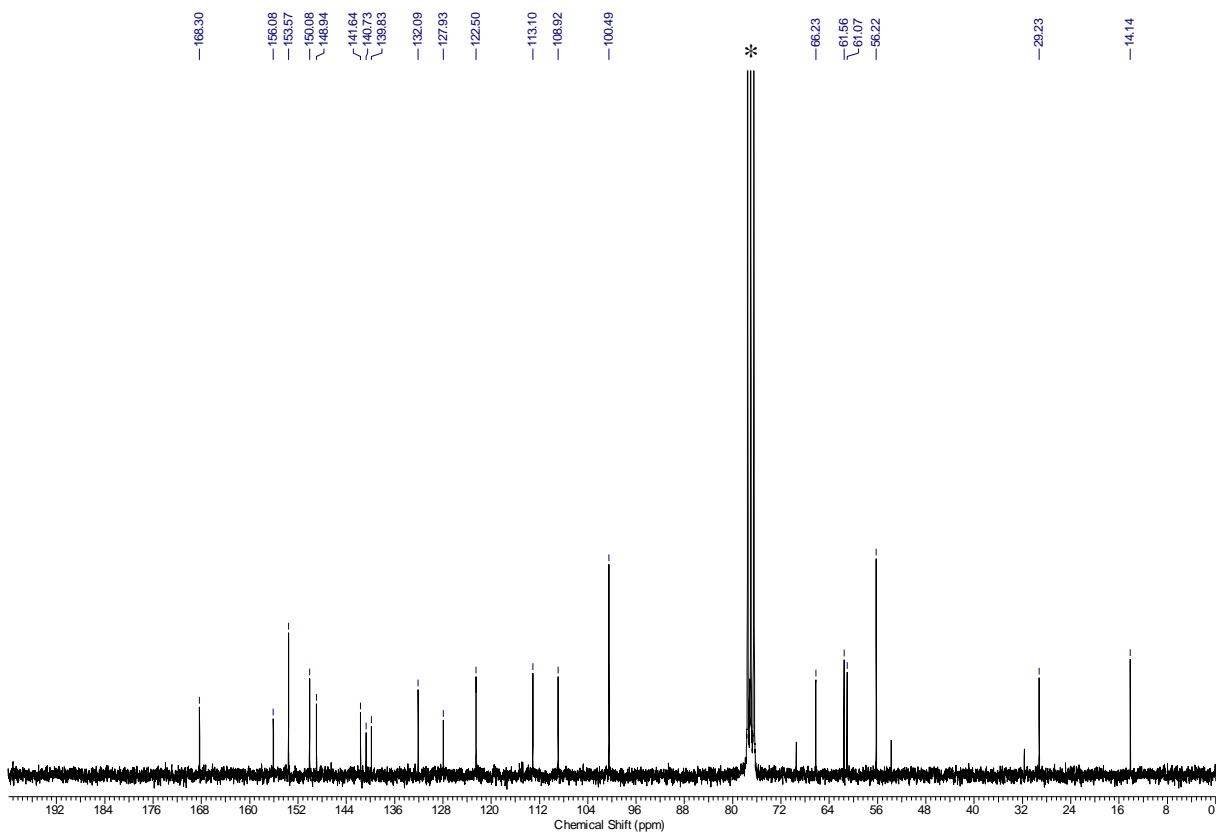

$^1\text{H-NMR}$  (300 MHz,  $\text{CDCl}_3$ ) and  $^{13}\text{C-NMR}$  (63 MHz,  $\text{CDCl}_3$ ) spectrum of compound **4a**. \* = NMR-solvent

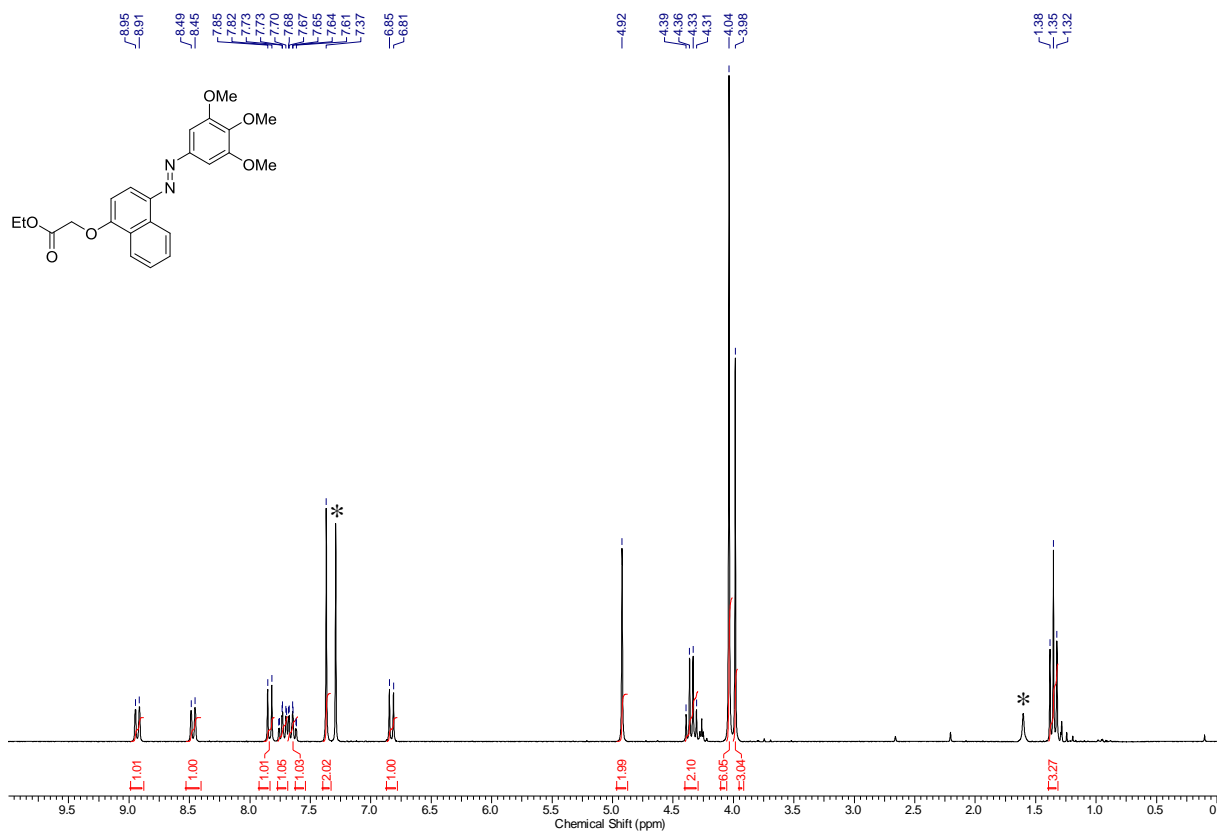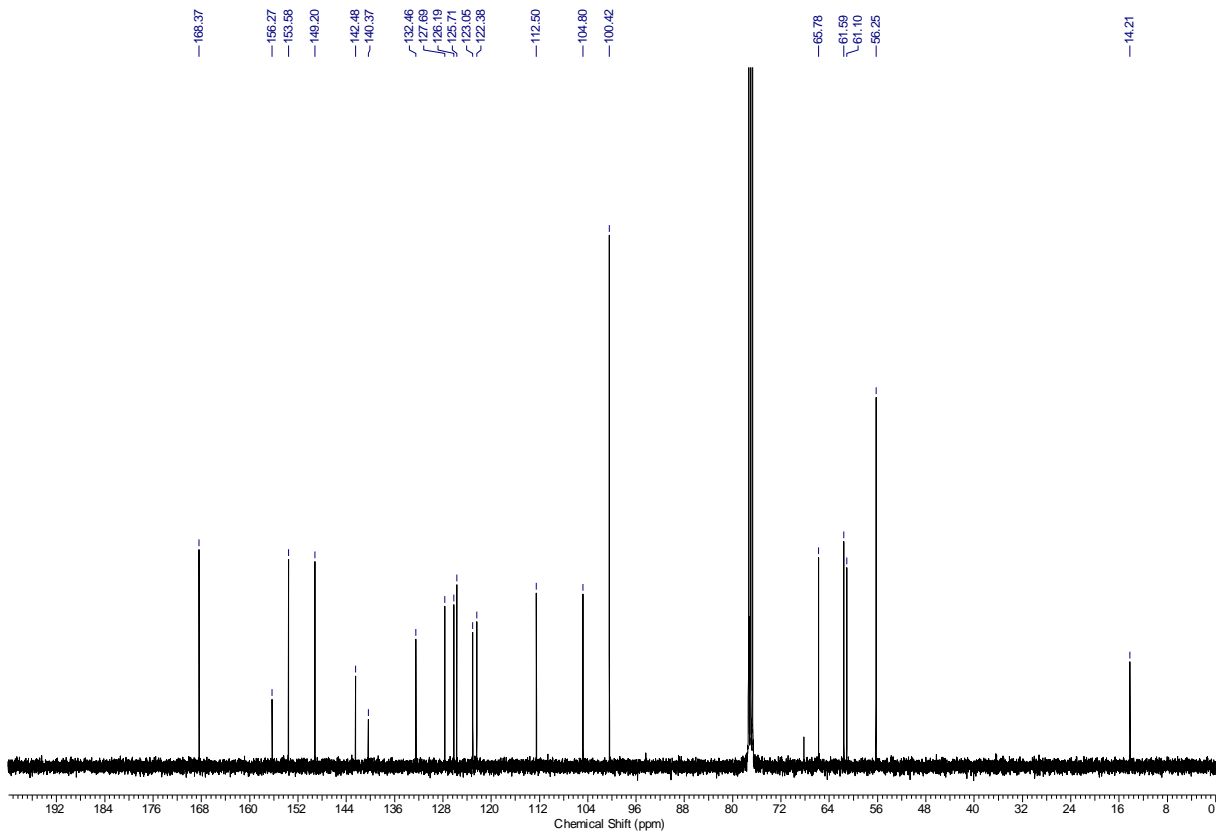

<sup>1</sup>H-NMR (250 MHz, CDCl<sub>3</sub>) and <sup>13</sup>C-NMR (101 MHz, CDCl<sub>3</sub>) spectrum of compound **4b**. \* = NMR-solvent, H<sub>2</sub>O

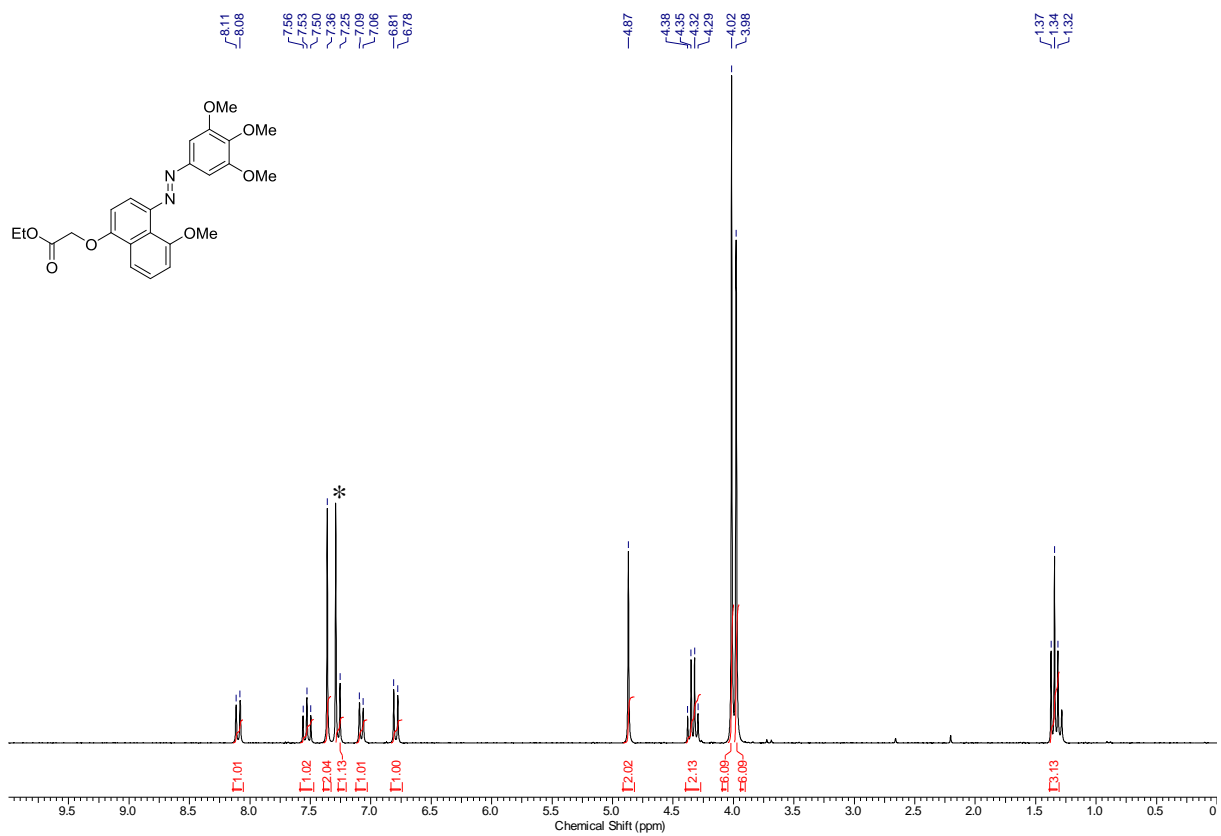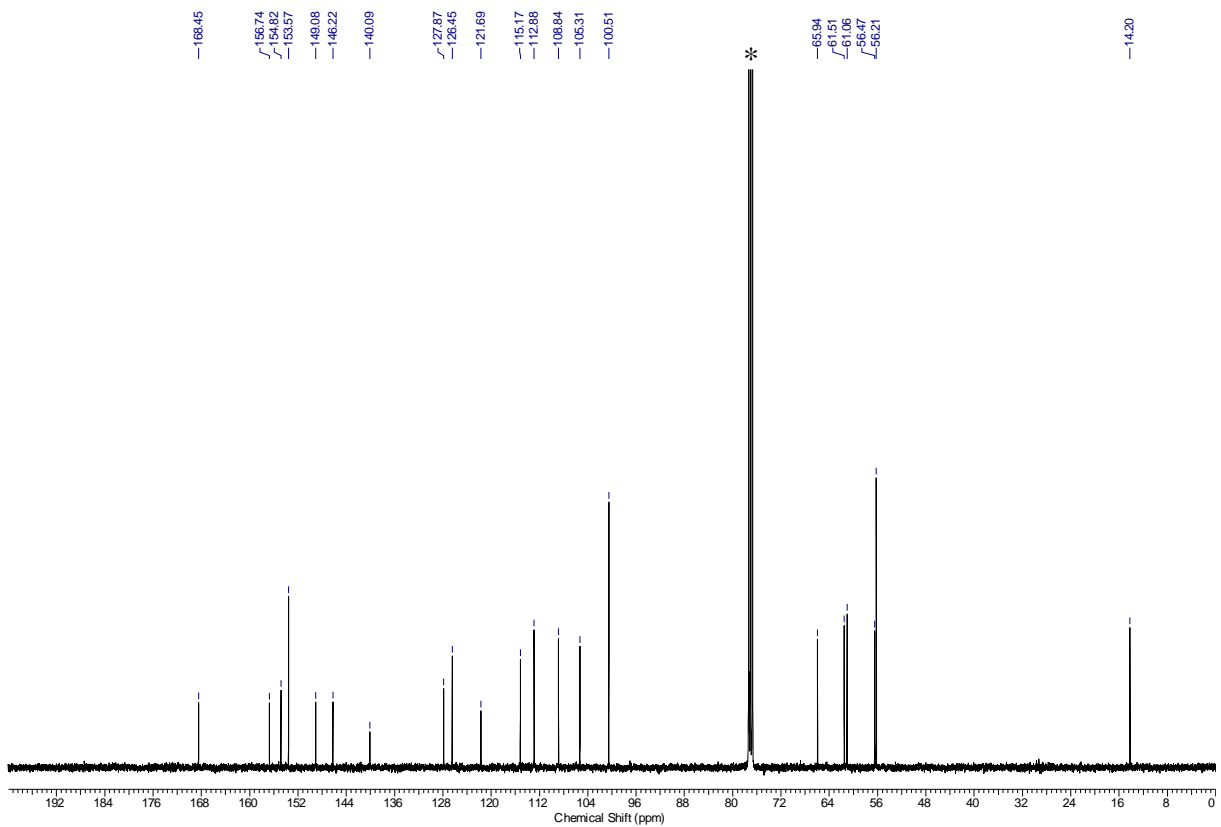

<sup>1</sup>H-NMR (250 MHz, CDCl<sub>3</sub>) and <sup>13</sup>C-NMR (63 MHz, CDCl<sub>3</sub>) spectrum of compound **4c**. \* = NMR-solvent

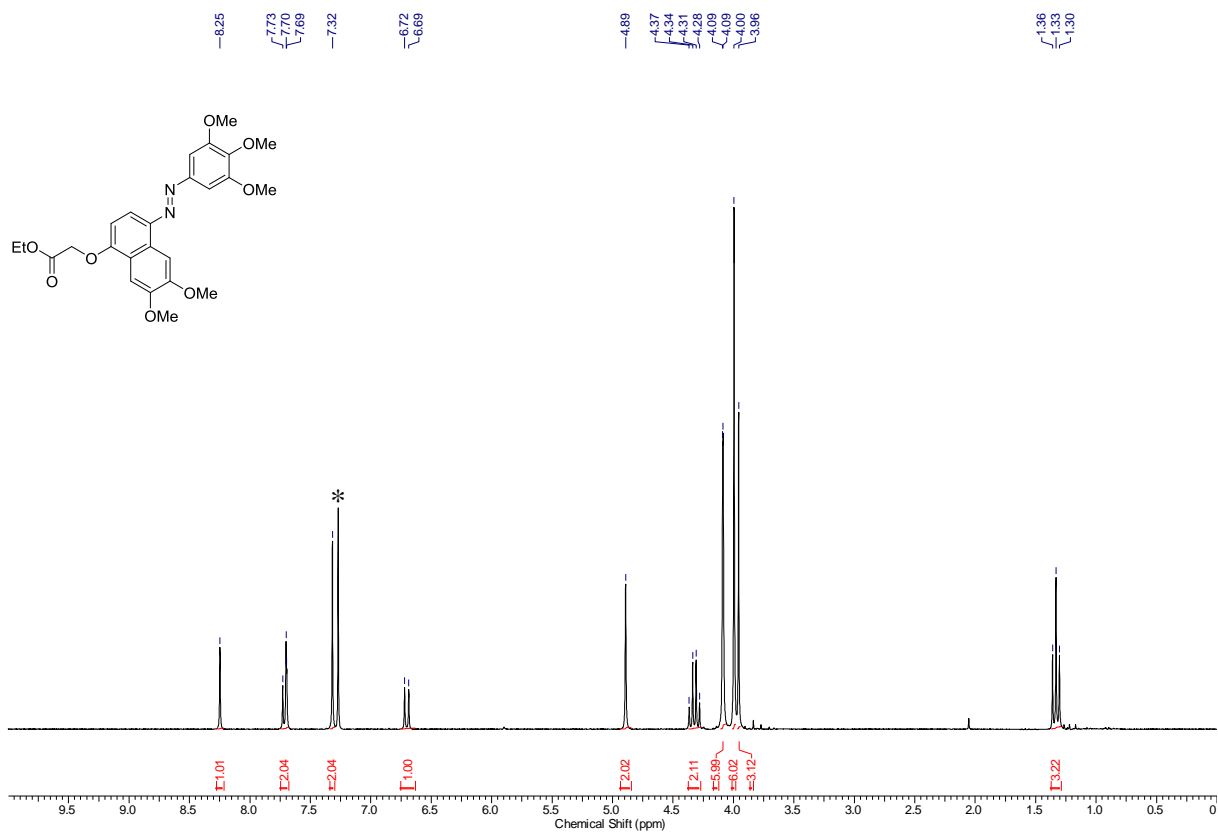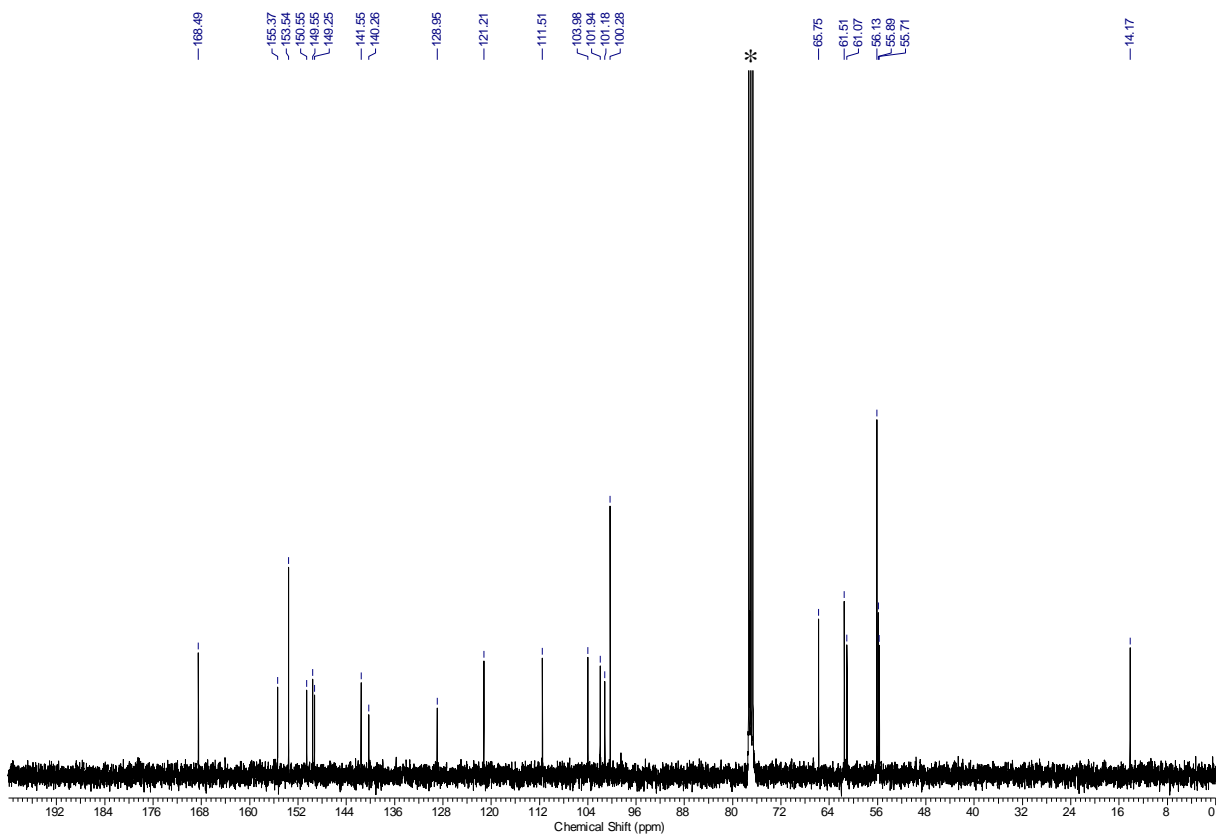

<sup>1</sup>H-NMR (250 MHz, CDCl<sub>3</sub>) and <sup>13</sup>C-NMR (101 MHz, CDCl<sub>3</sub>) spectrum of compound **4d**. \* = NMR-solvent



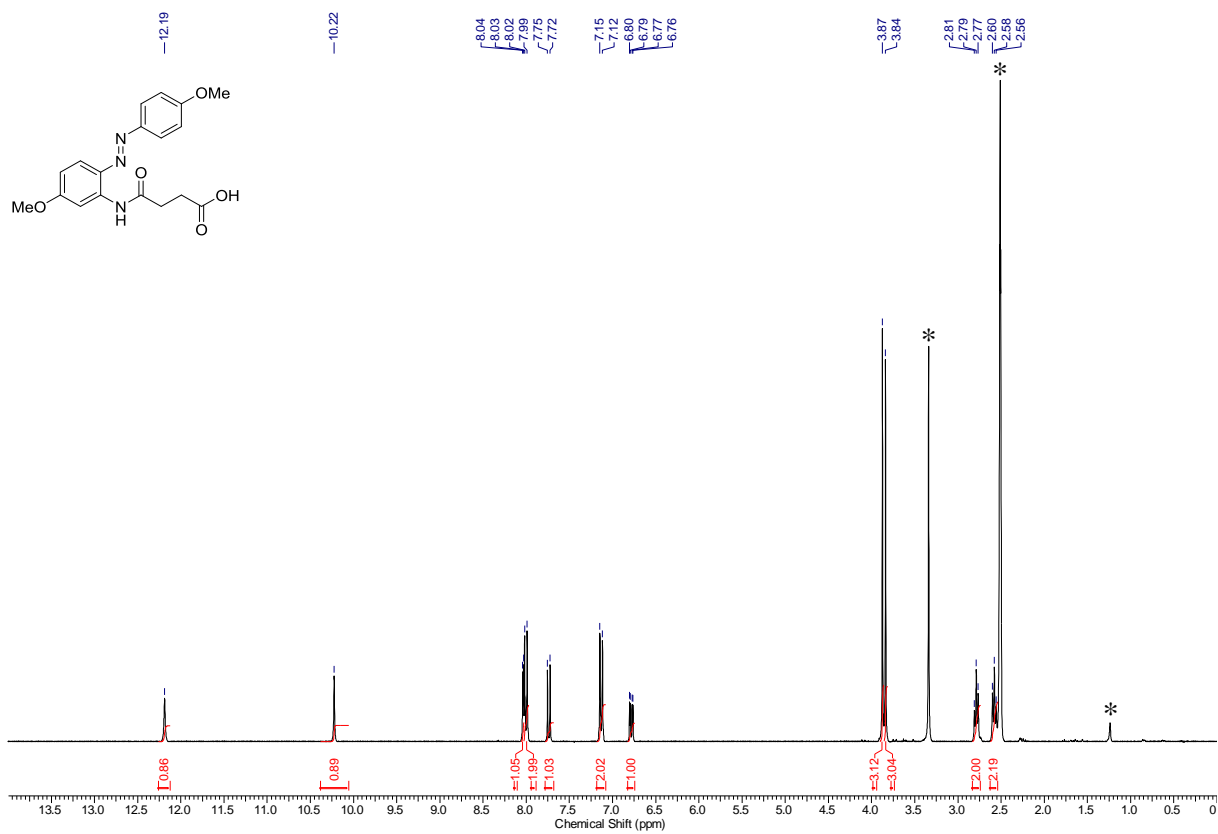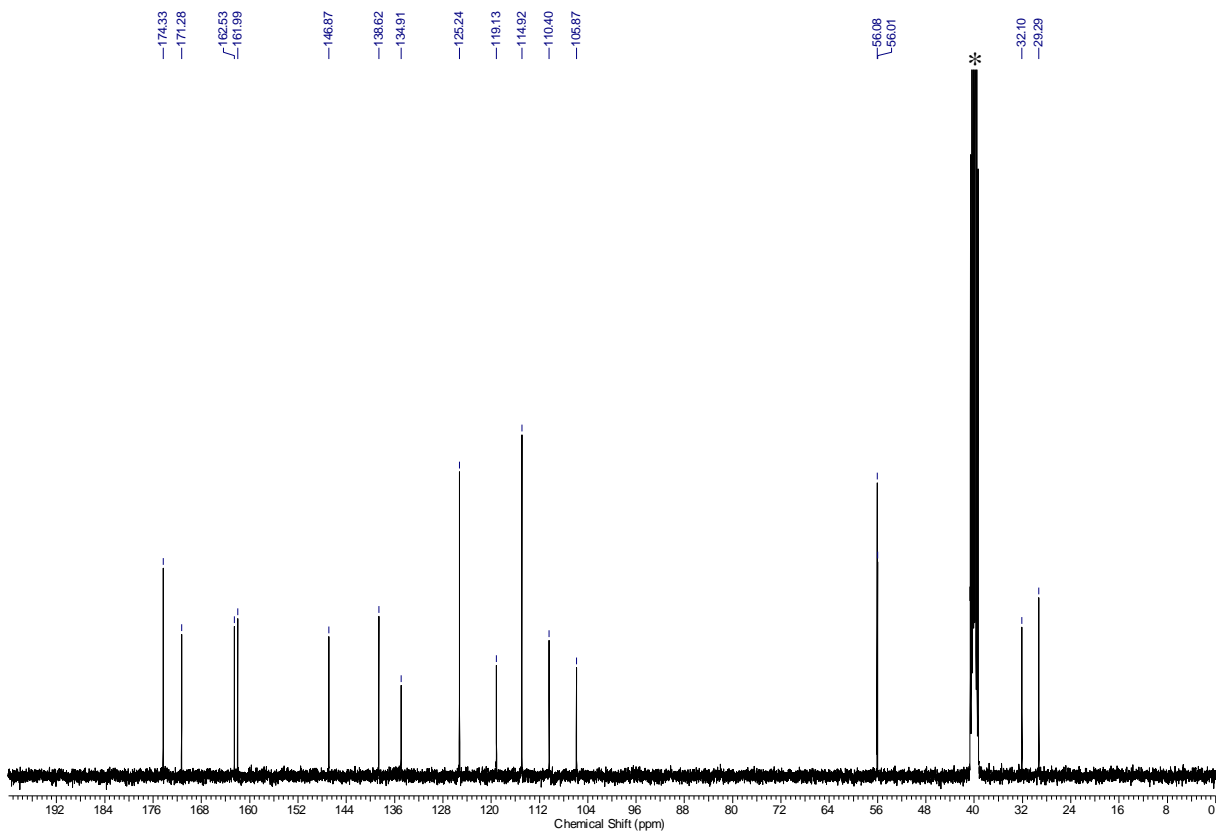

<sup>1</sup>H-NMR (300 MHz, DMSO-*d*<sub>6</sub>) and <sup>13</sup>C-NMR (101 MHz, DMSO-*d*<sub>6</sub>) spectrum of compound 5a. \* = NMR-solvent, H<sub>2</sub>O, grease

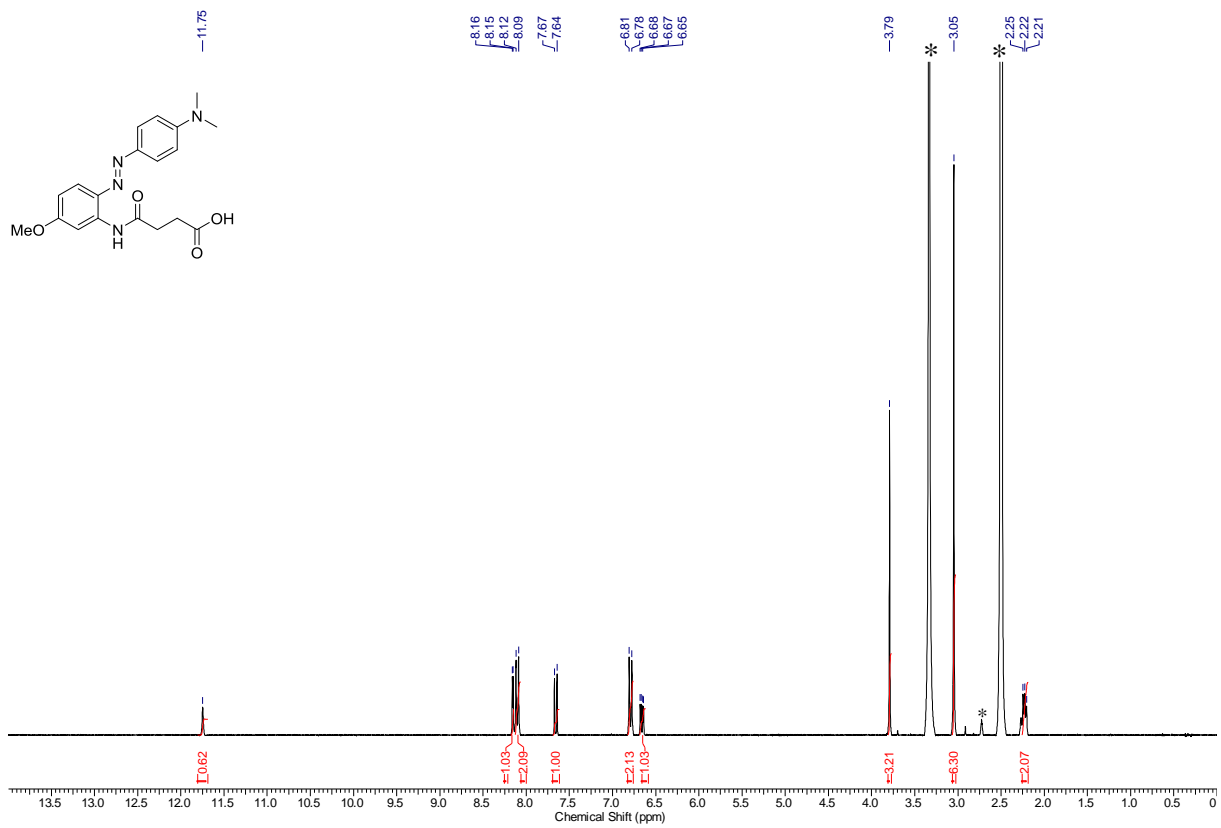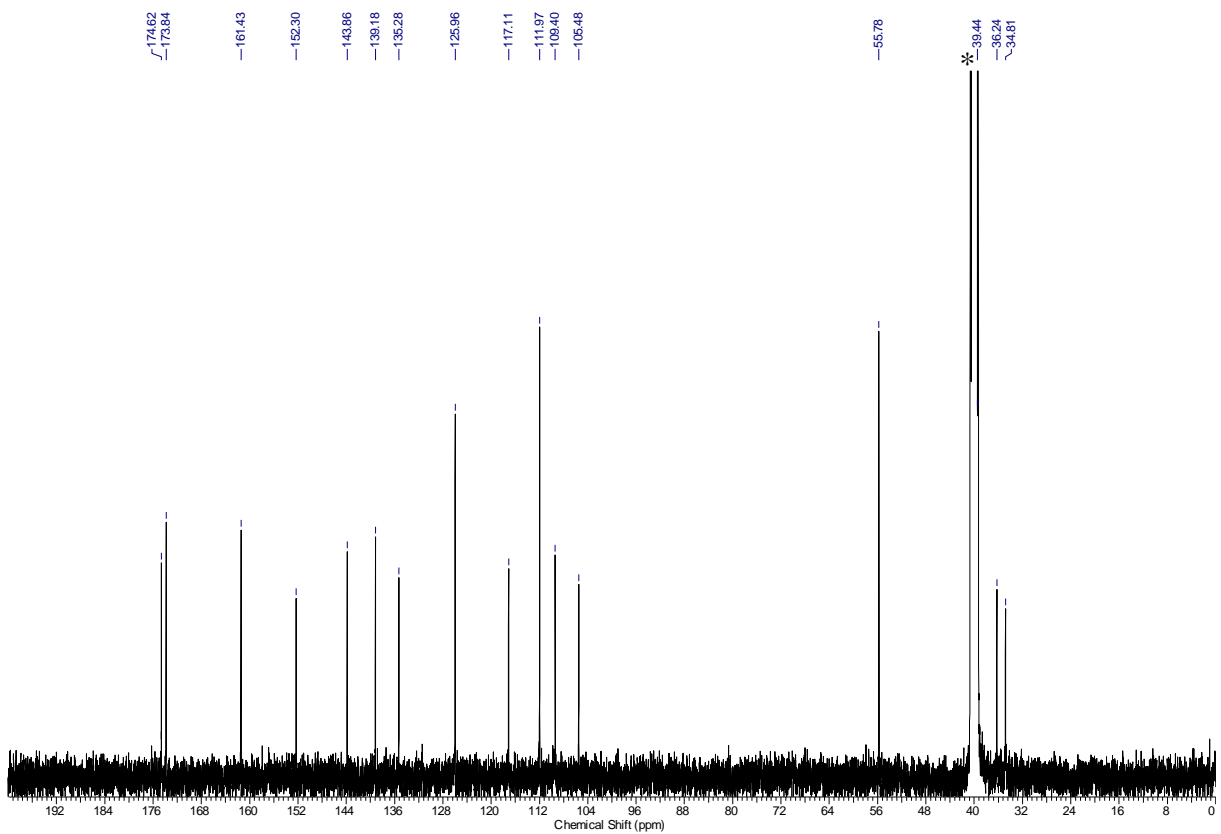

<sup>1</sup>H-NMR (300 MHz, DMSO-*d*<sub>6</sub>) and <sup>13</sup>C-NMR (101 MHz, DMSO-*d*<sub>6</sub>) spectrum of compound **5b**. \* = NMR-solvent, H<sub>2</sub>O

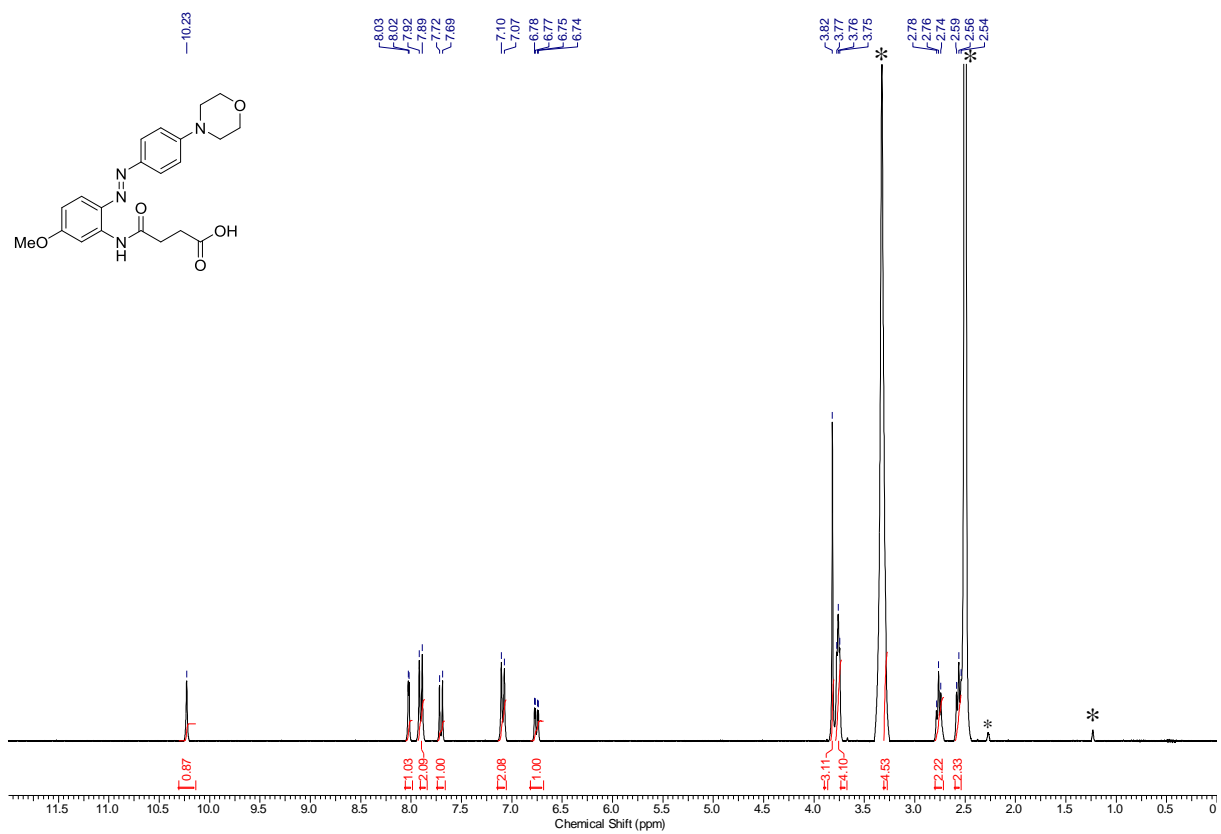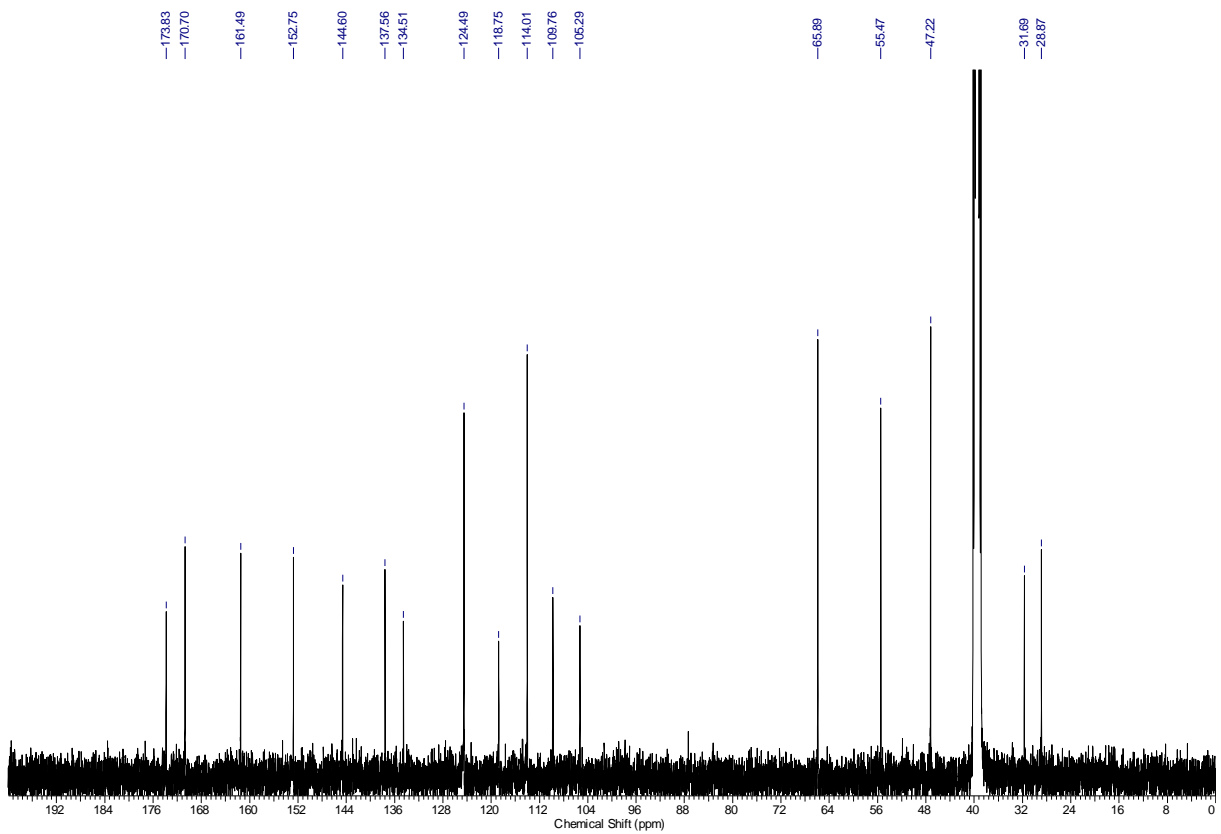

<sup>1</sup>H-NMR (300 MHz, DMSO-*d*<sub>6</sub>) and <sup>13</sup>C-NMR (101 MHz, DMSO-*d*<sub>6</sub>) spectrum of compound **5c**. \* = NMR-solvent, H<sub>2</sub>O, grease

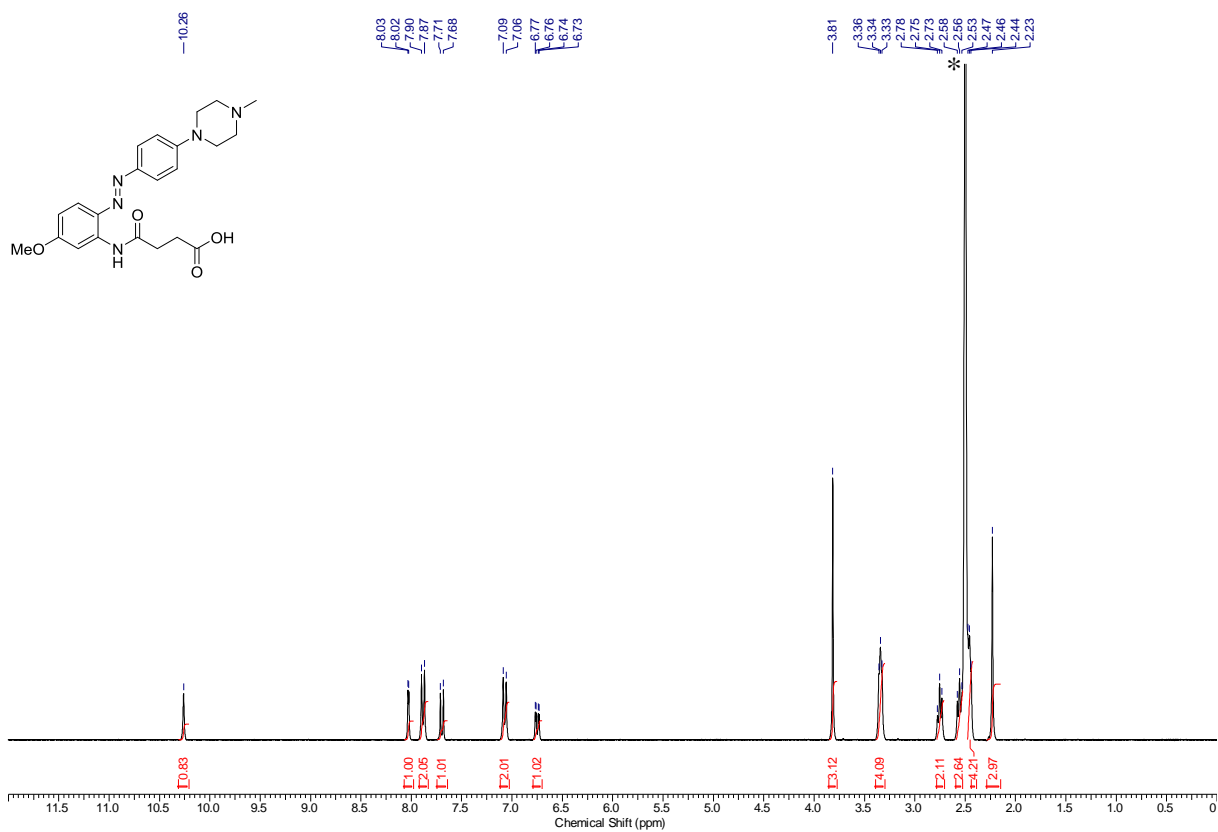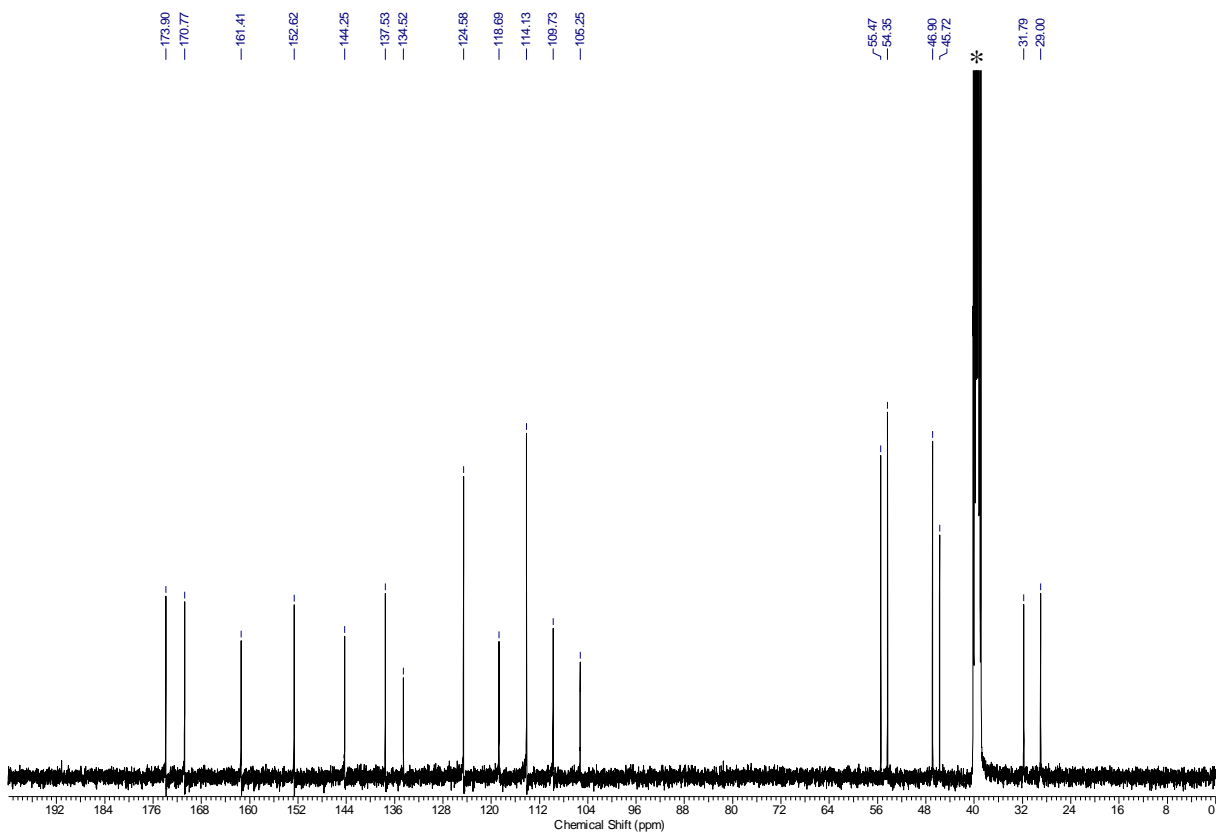

$^1\text{H-NMR}$  (300 MHz,  $\text{DMSO-}d_6$ ) and  $^{13}\text{C-NMR}$  (101 MHz,  $\text{DMSO-}d_6$ ) spectrum of compound **5d**. \* = NMR-solvent

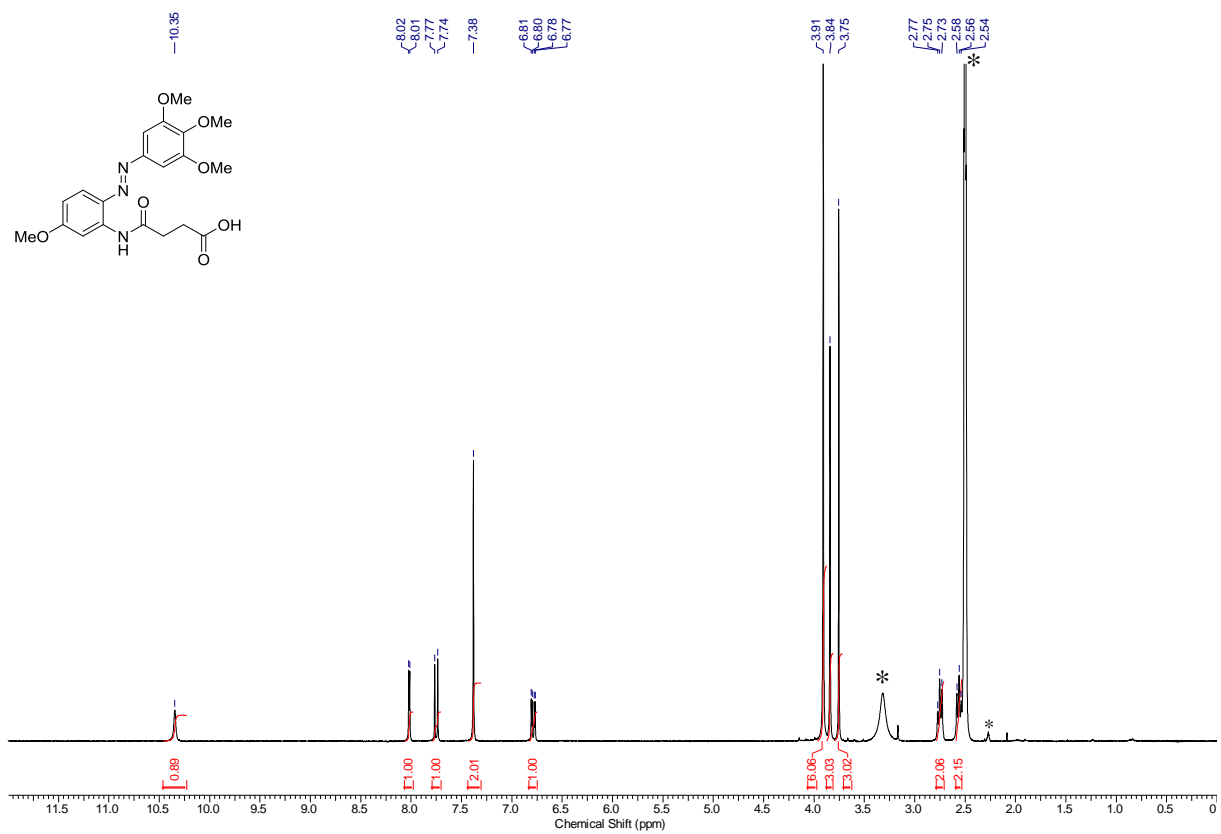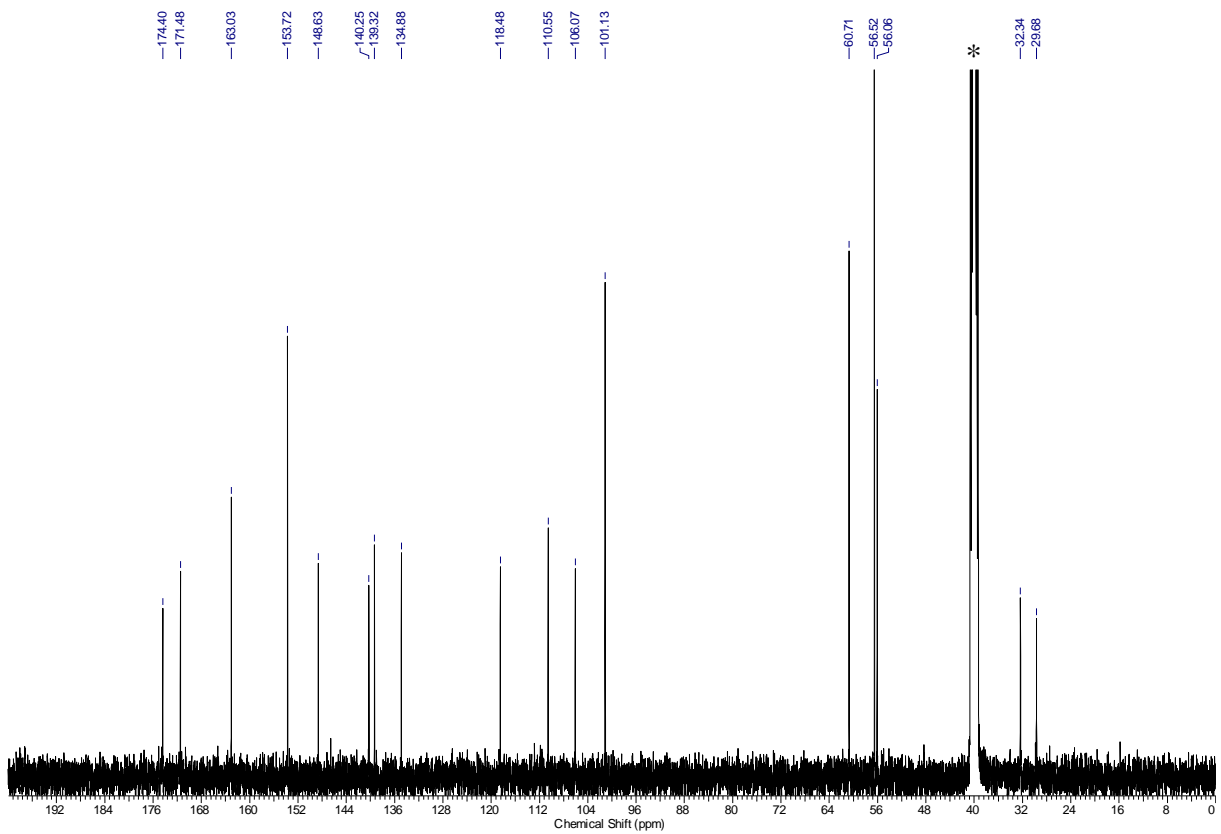

<sup>1</sup>H-NMR (300 MHz, DMSO-*d*<sub>6</sub>) and <sup>13</sup>C-NMR (101 MHz, DMSO-*d*<sub>6</sub>) spectrum of compound 6. \* = NMR-solvent, H<sub>2</sub>O

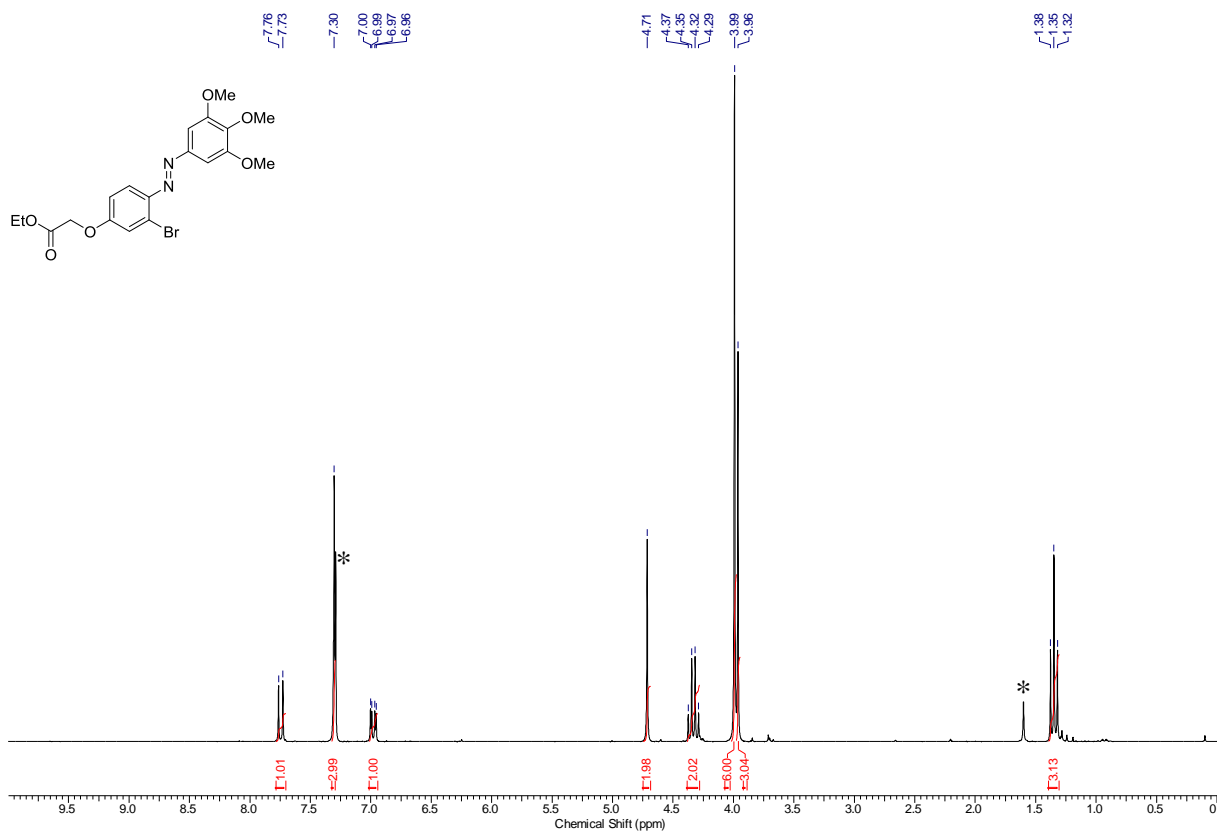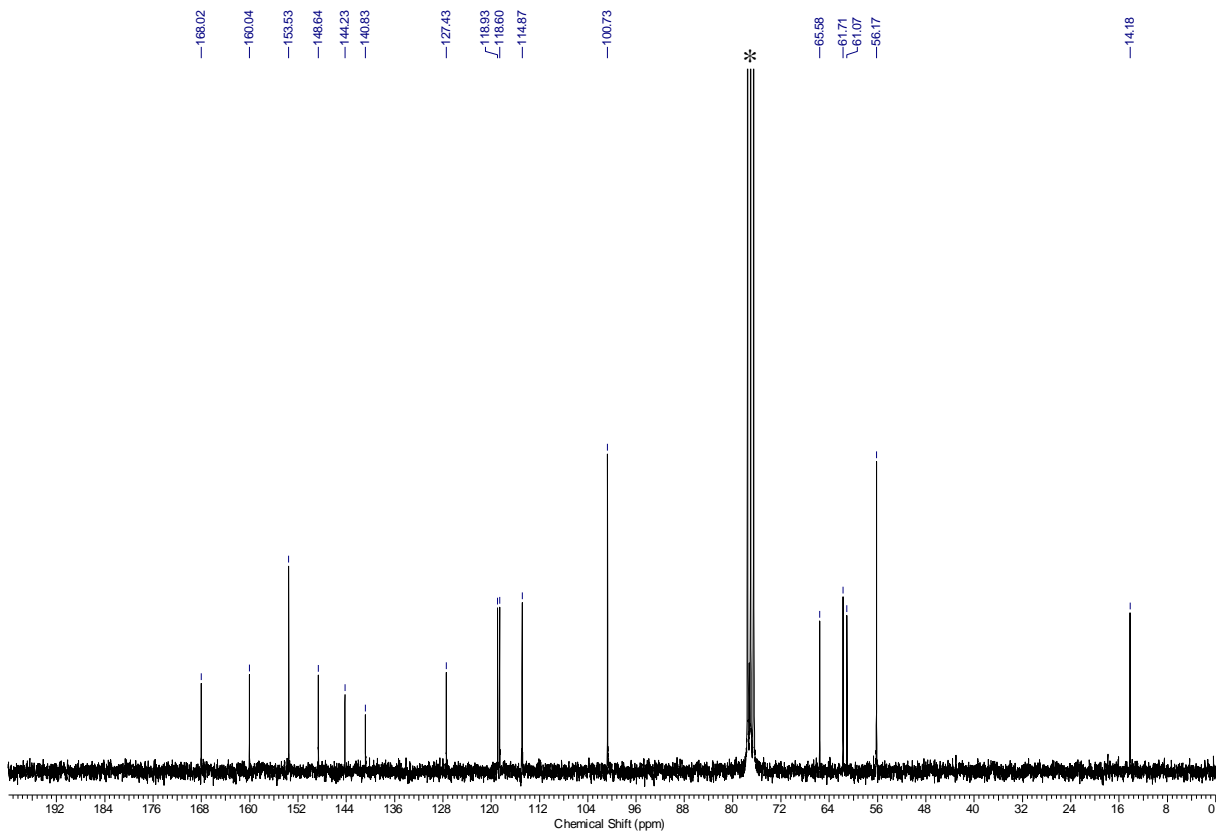

<sup>1</sup>H-NMR (250 MHz, CDCl<sub>3</sub>) and <sup>13</sup>C-NMR (63 MHz, CDCl<sub>3</sub>) spectrum of compound **7a**. \* = NMR-solvent, H<sub>2</sub>O

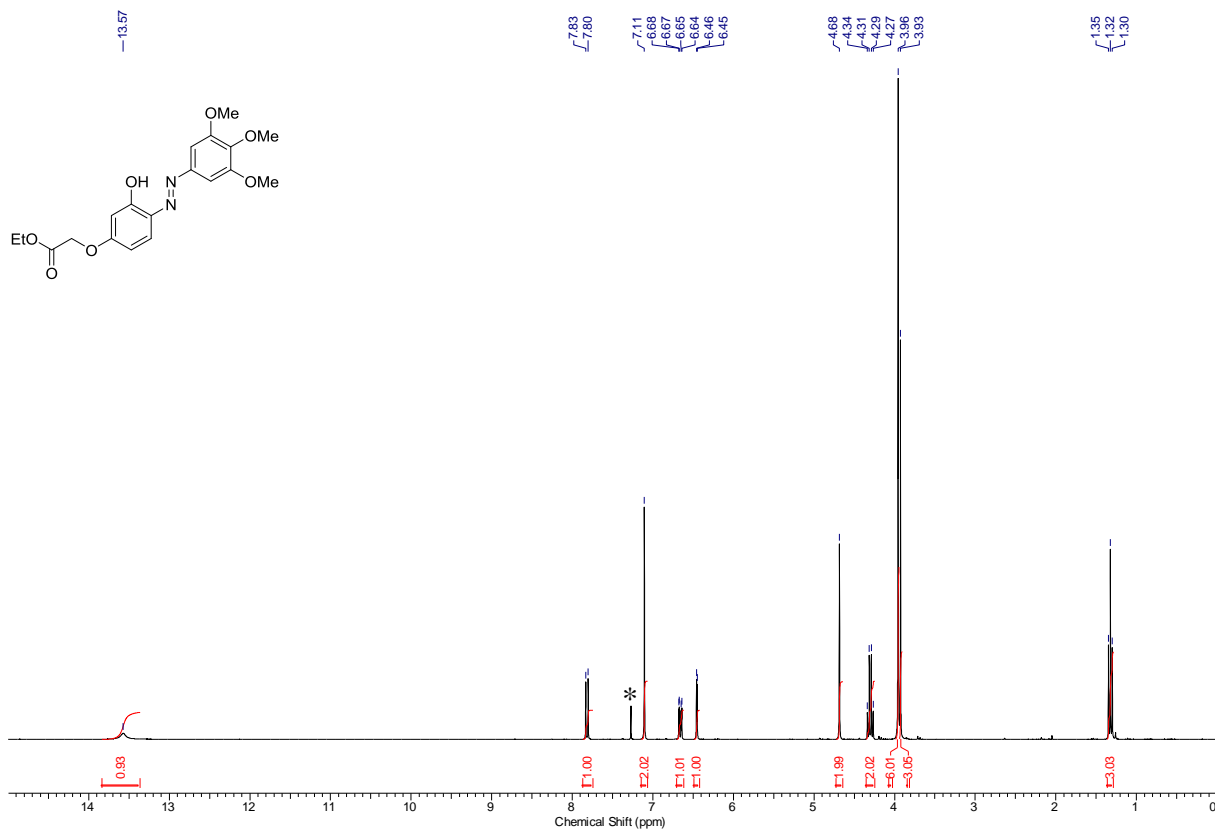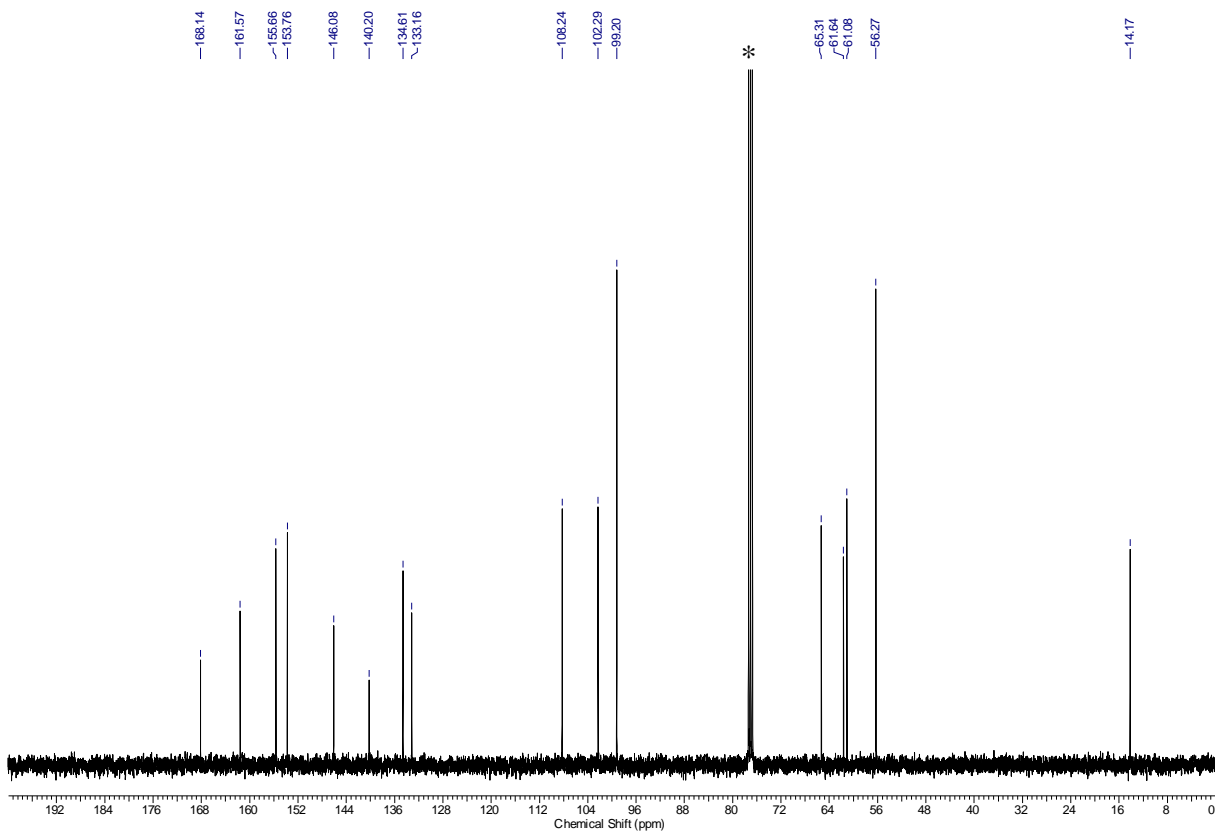

<sup>1</sup>H-NMR (300 MHz, CDCl<sub>3</sub>) and <sup>13</sup>C-NMR (101 MHz, CDCl<sub>3</sub>) spectrum of compound **7b**. \* = NMR-solvent

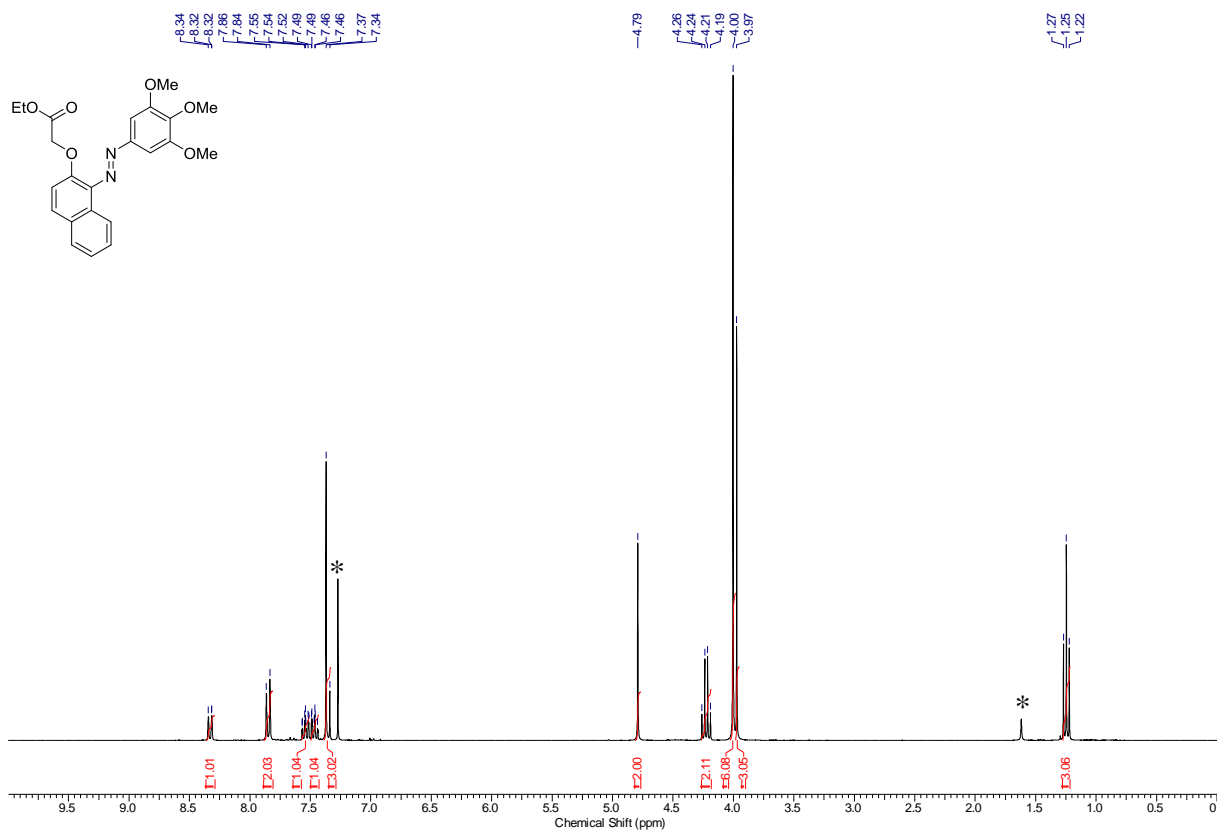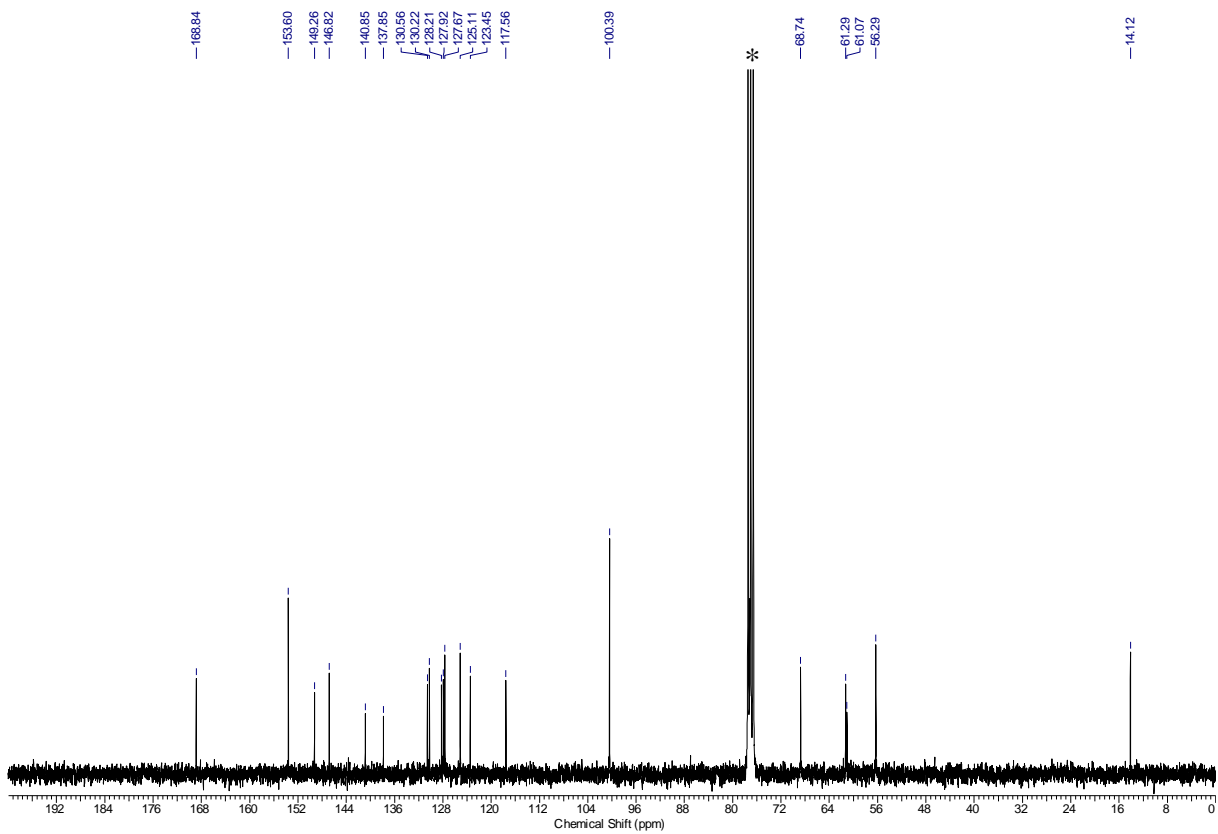

$^1\text{H-NMR}$  (300 MHz,  $\text{CDCl}_3$ ) and  $^{13}\text{C-NMR}$  (75 MHz,  $\text{CDCl}_3$ ) spectrum of compound **8**. \* = NMR-solvent,  $\text{H}_2\text{O}$



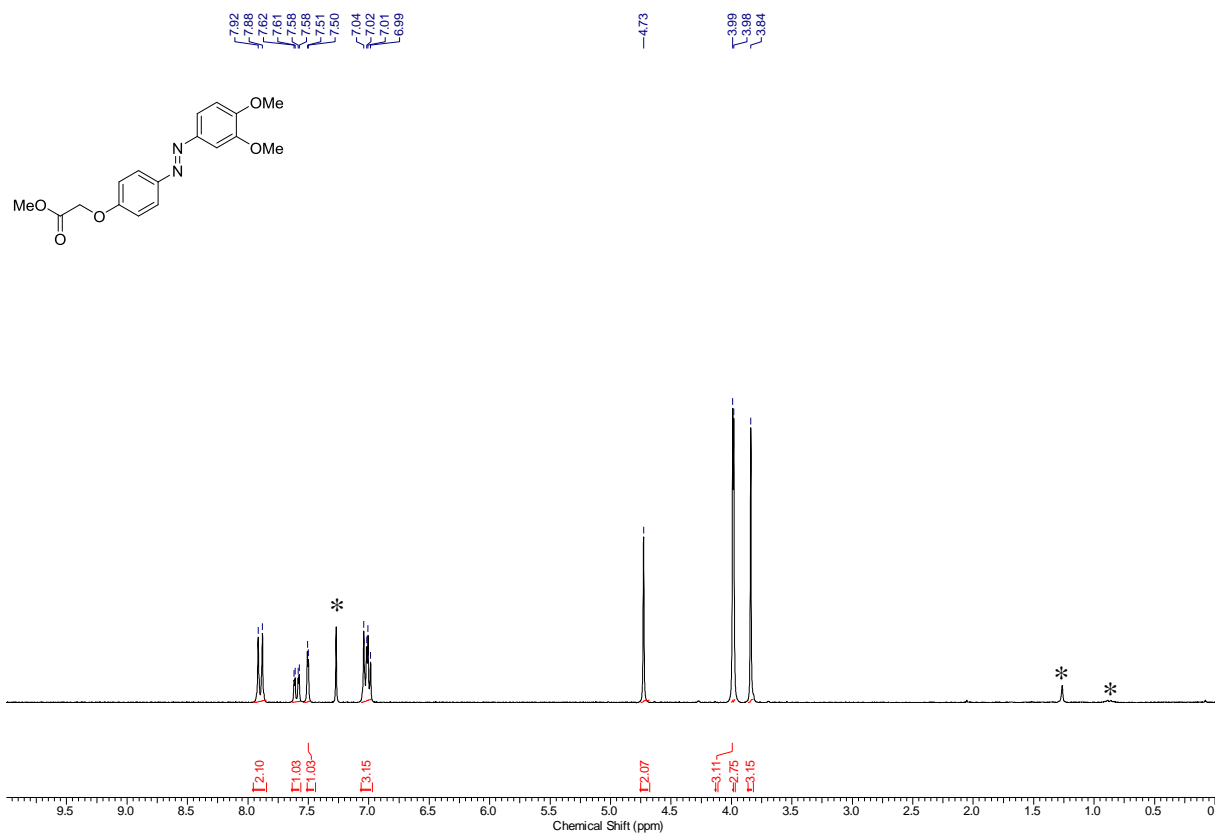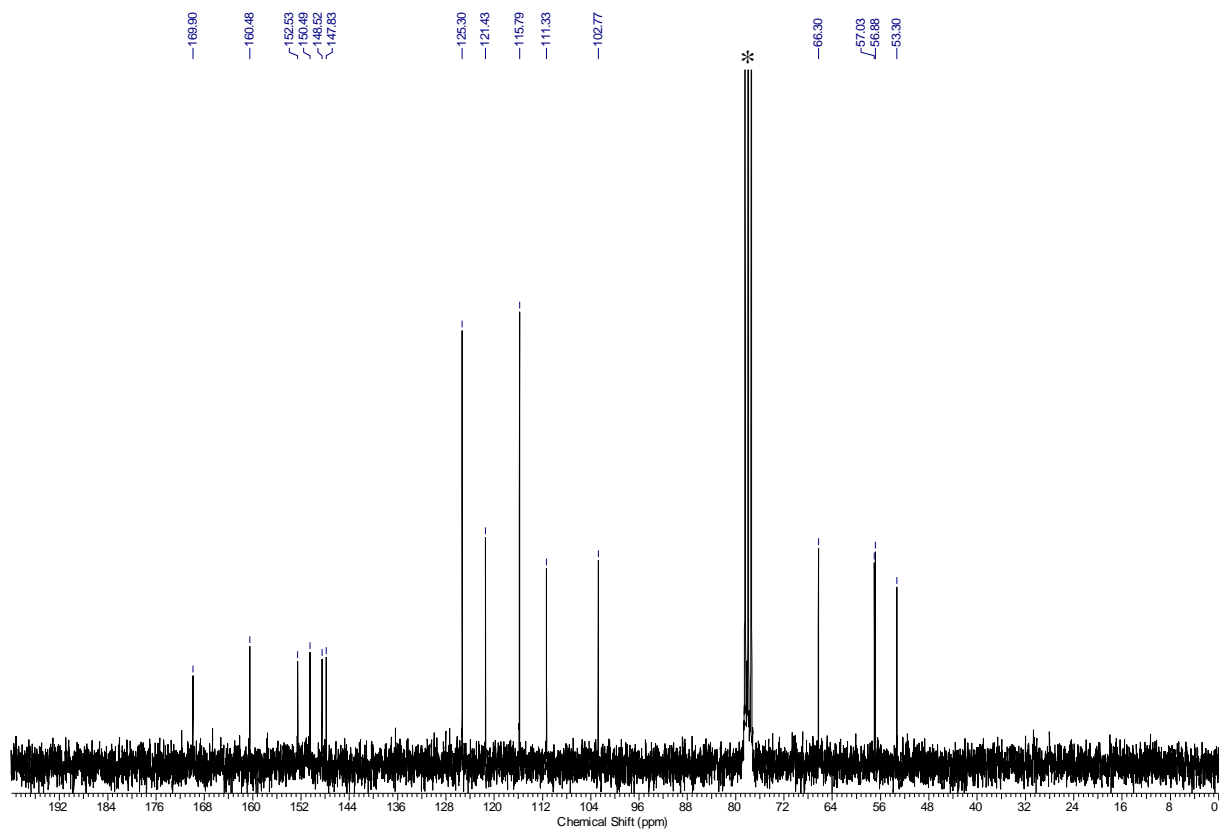

<sup>1</sup>H-NMR (250 MHz, CDCl<sub>3</sub>) and <sup>13</sup>C-NMR (63 MHz, CDCl<sub>3</sub>) spectrum of compound **9a**. \* = NMR-solvent, grease

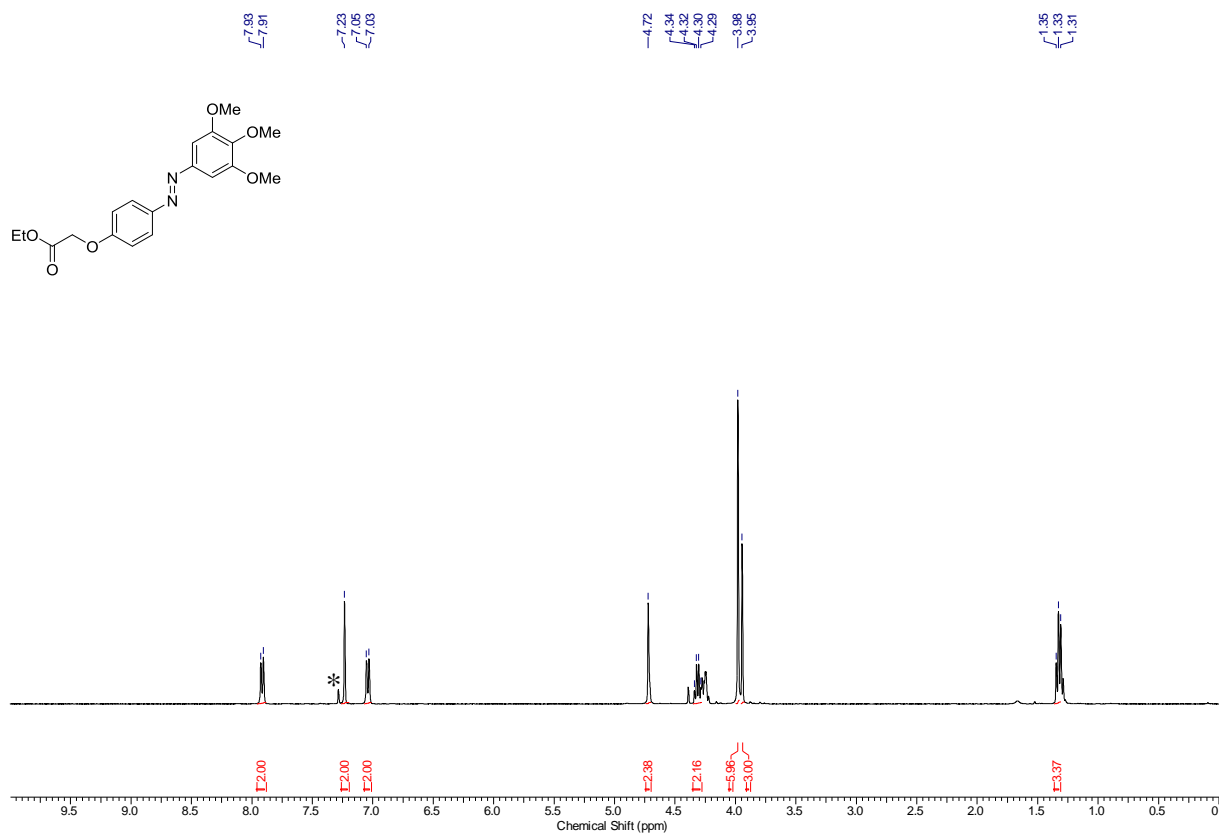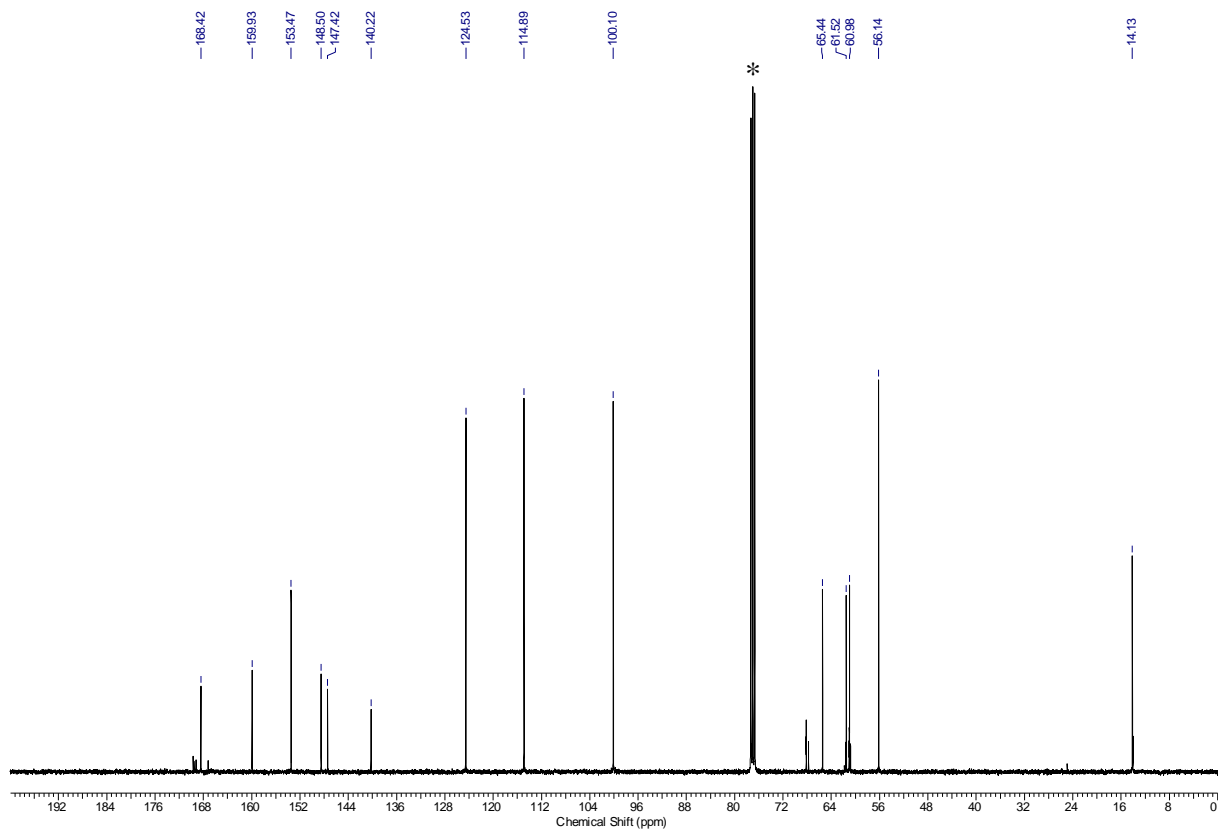

<sup>1</sup>H-NMR (400 MHz, CDCl<sub>3</sub>) and <sup>13</sup>C-NMR (101 MHz, CDCl<sub>3</sub>) spectrum of compound **9b**. \* = NMR-solvent

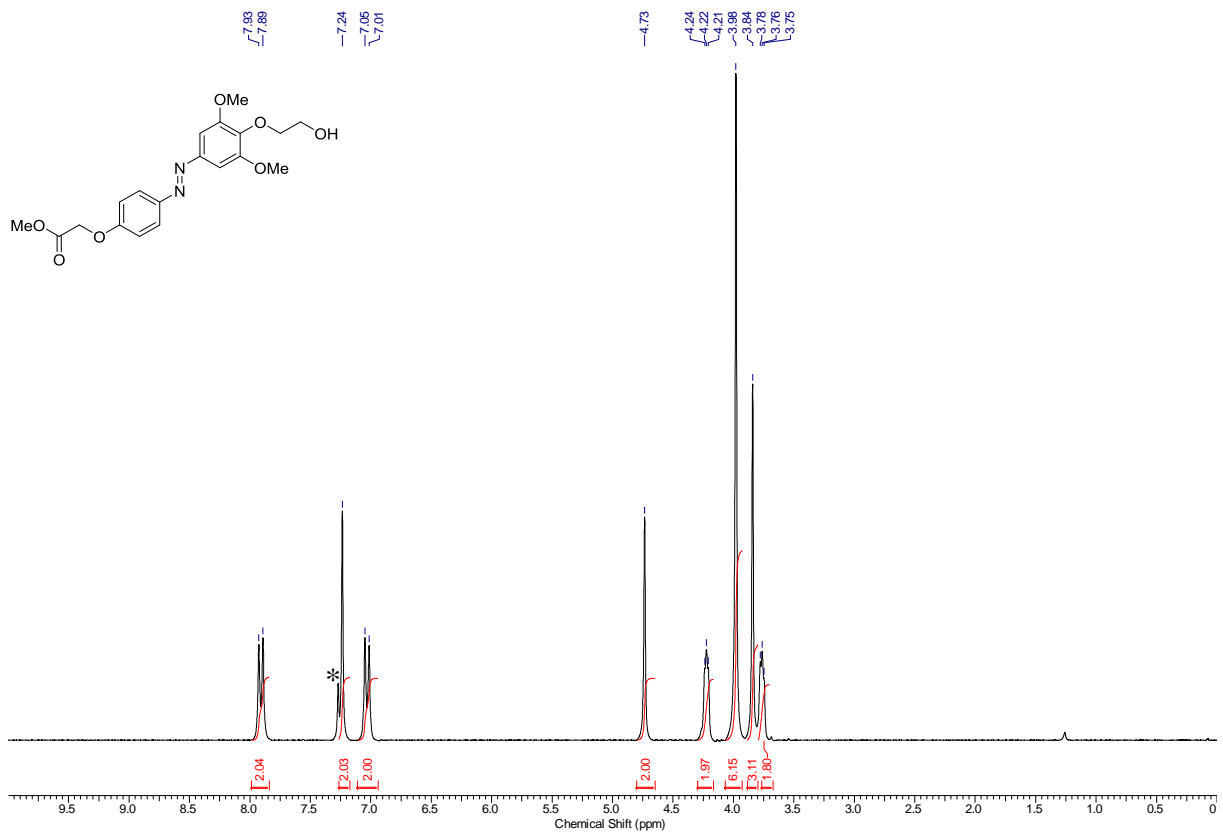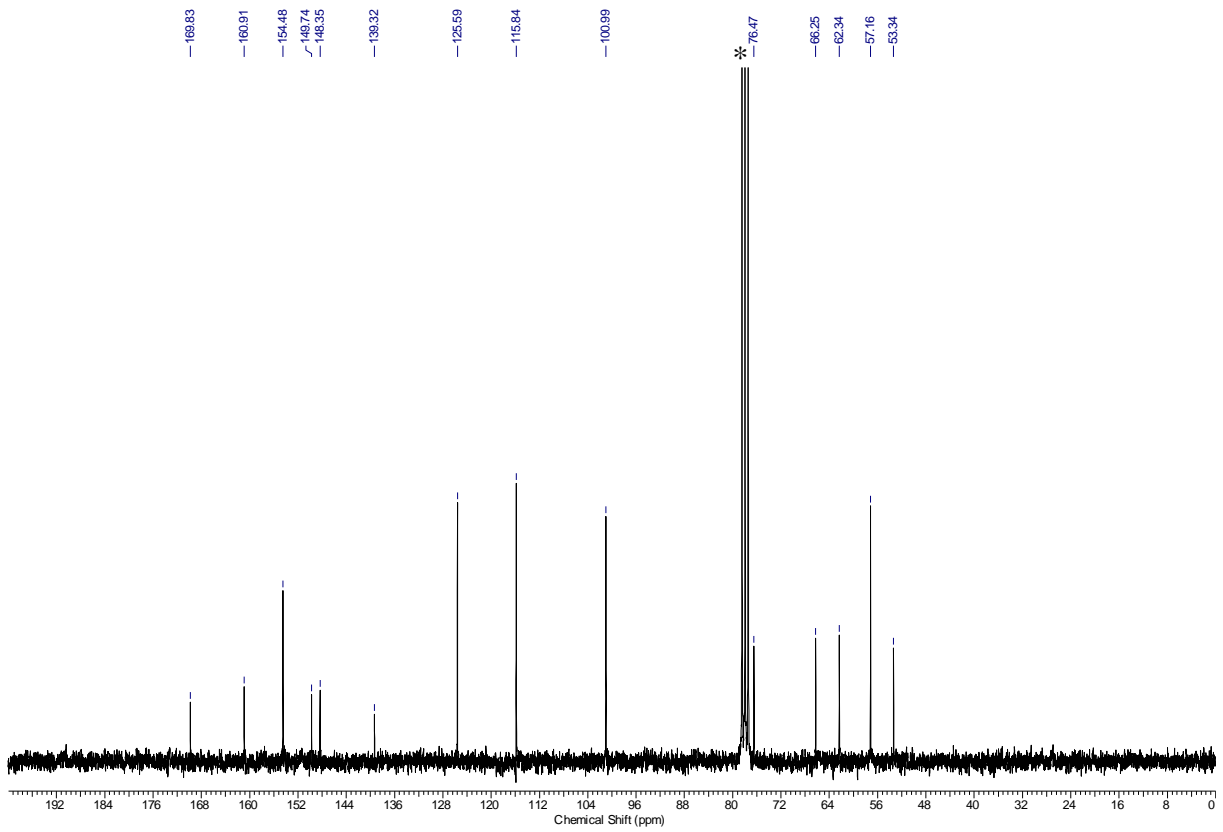

<sup>1</sup>H-NMR (250 MHz, CDCl<sub>3</sub>) and <sup>13</sup>C-NMR (63 MHz, CDCl<sub>3</sub>) spectrum of compound **9c**. \* = NMR-solvent



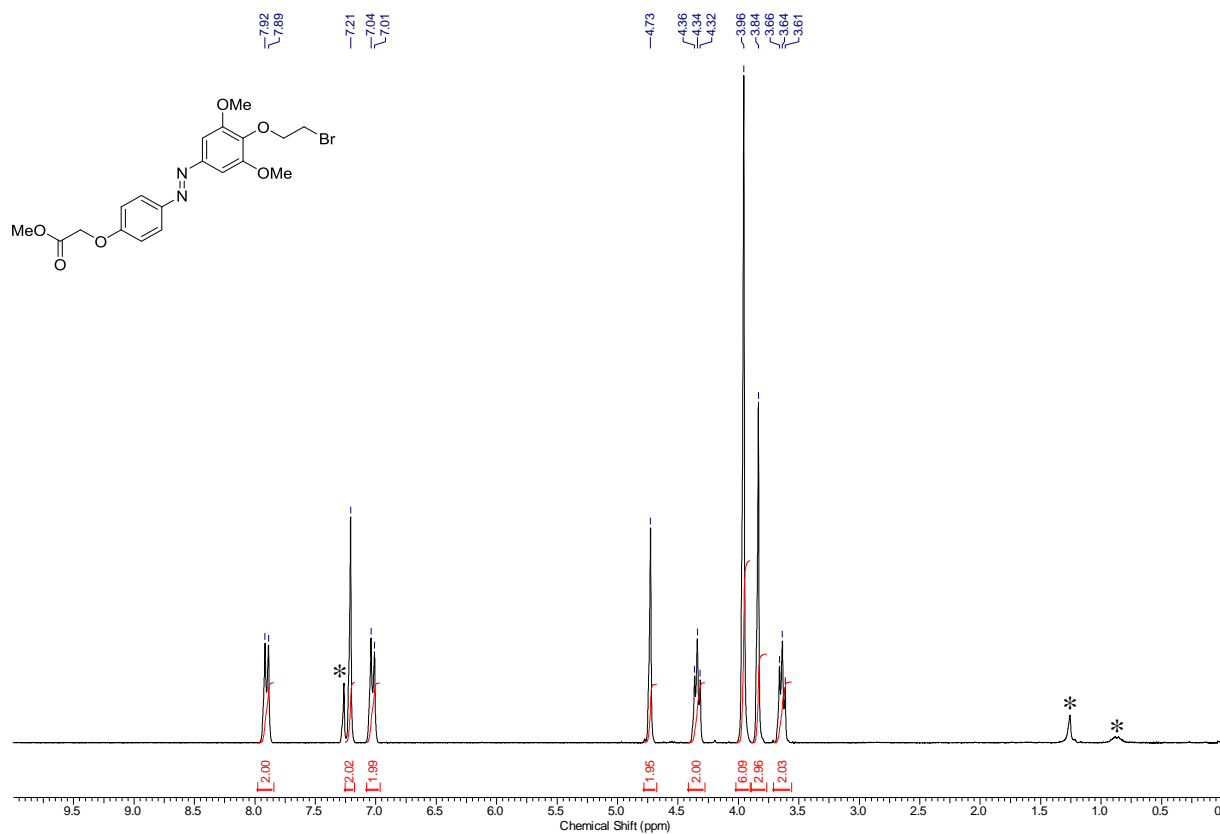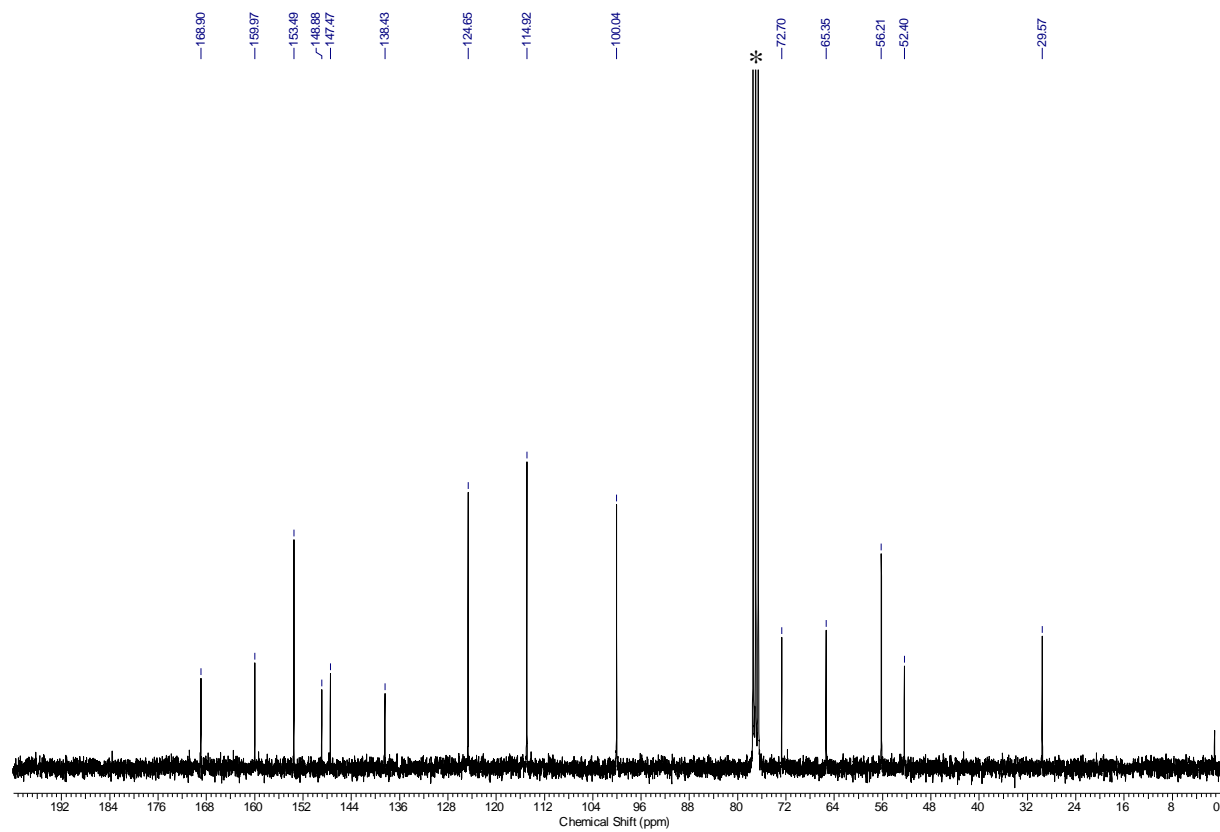

<sup>1</sup>H-NMR (300 MHz, CDCl<sub>3</sub>) and <sup>13</sup>C-NMR (75 MHz, CDCl<sub>3</sub>) spectrum of compound **9d**. \* = NMR-solvent, grease

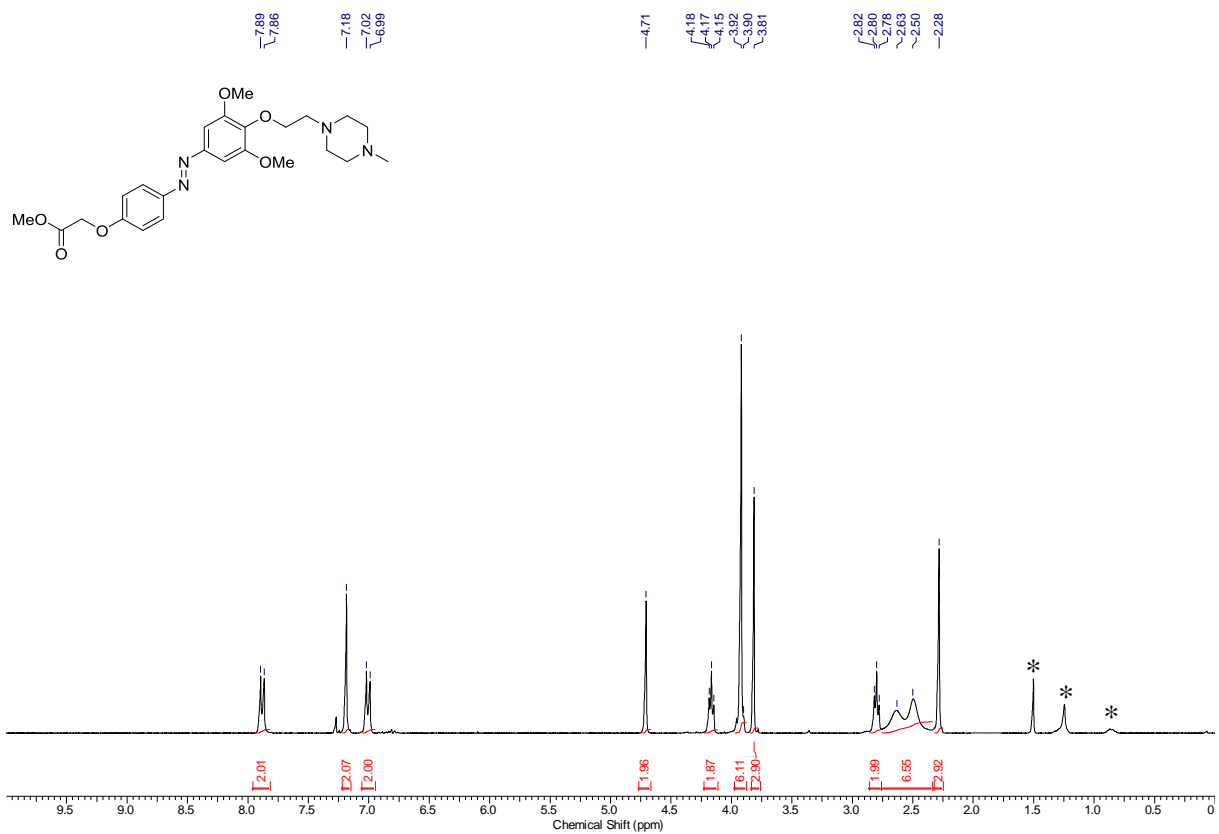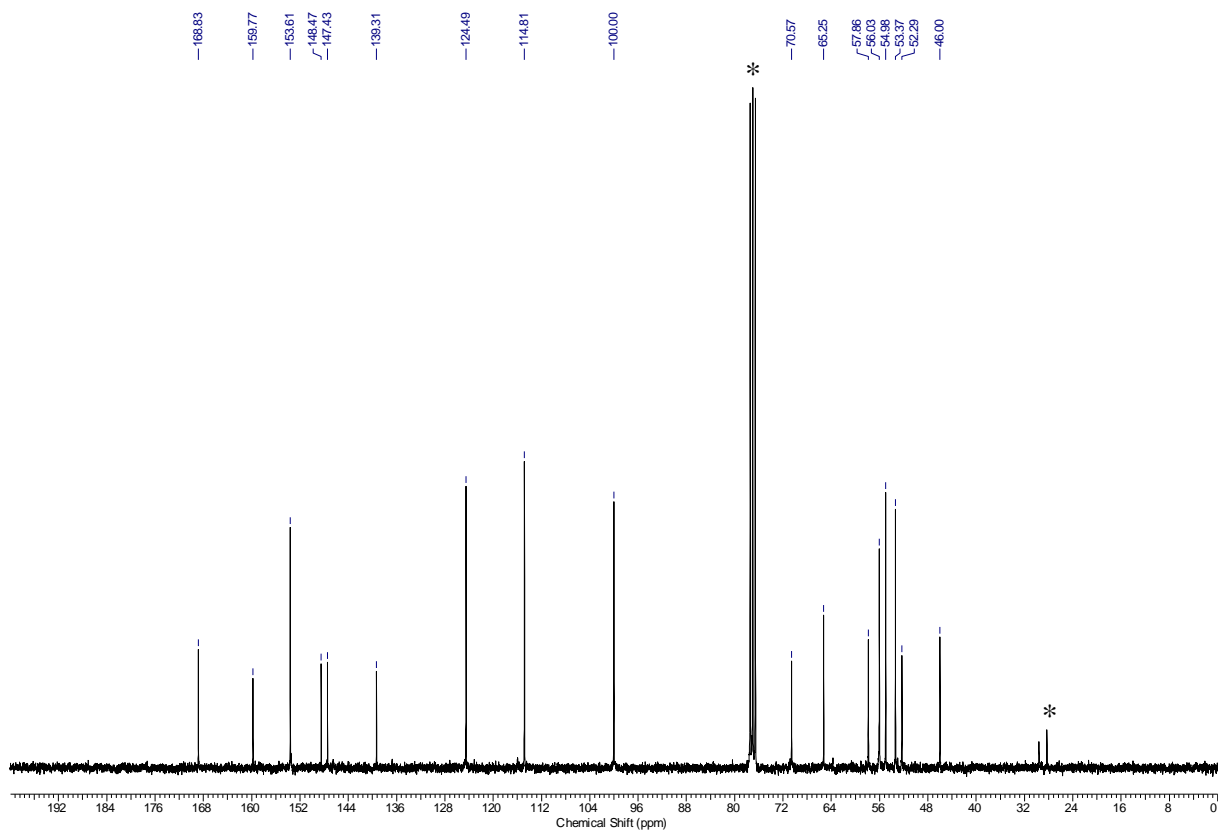

<sup>1</sup>H-NMR (300 MHz, CDCl<sub>3</sub>) and <sup>13</sup>C-NMR (75 MHz, CDCl<sub>3</sub>) spectrum of compound **9e**. \* = NMR-solvent, H<sub>2</sub>O, grease

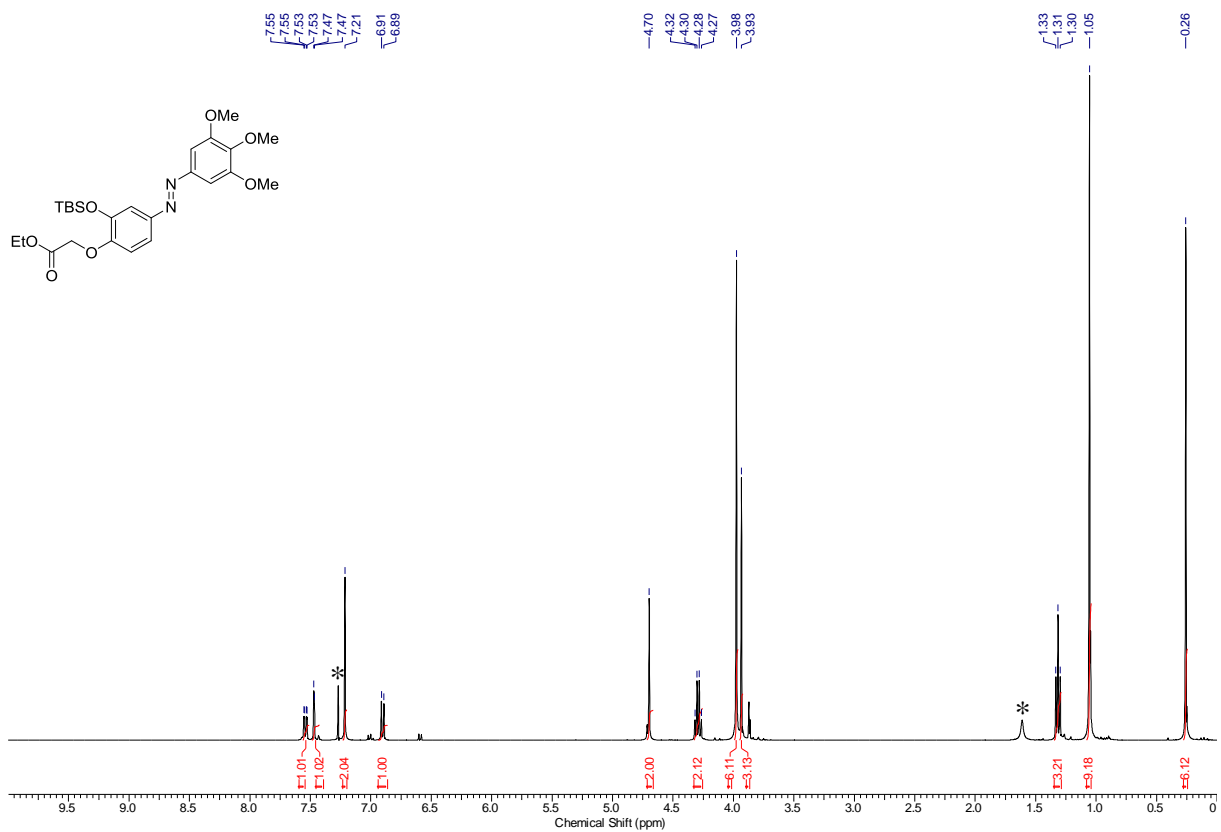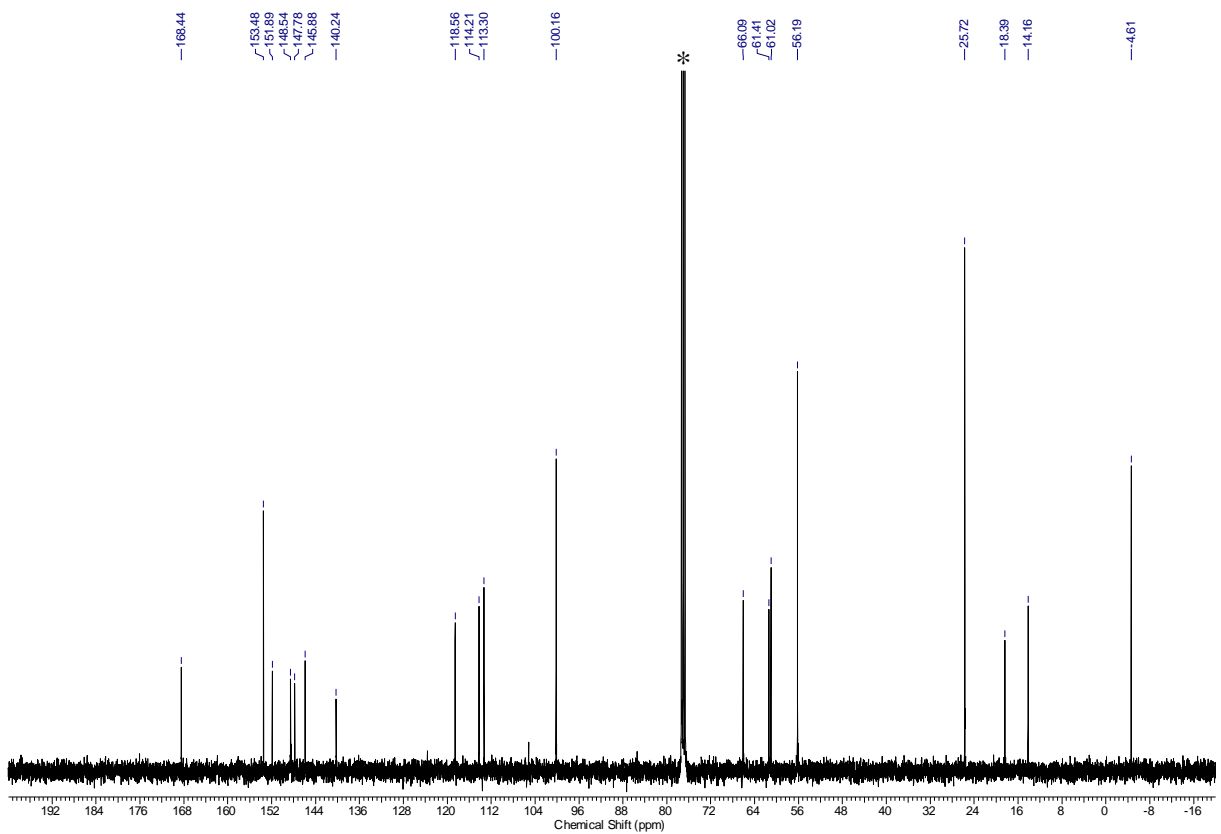

<sup>1</sup>H-NMR (400 MHz, CDCl<sub>3</sub>) and <sup>13</sup>C-NMR (101 MHz, CDCl<sub>3</sub>) spectrum of compound **10a**. \* = NMR-solvent, H<sub>2</sub>O

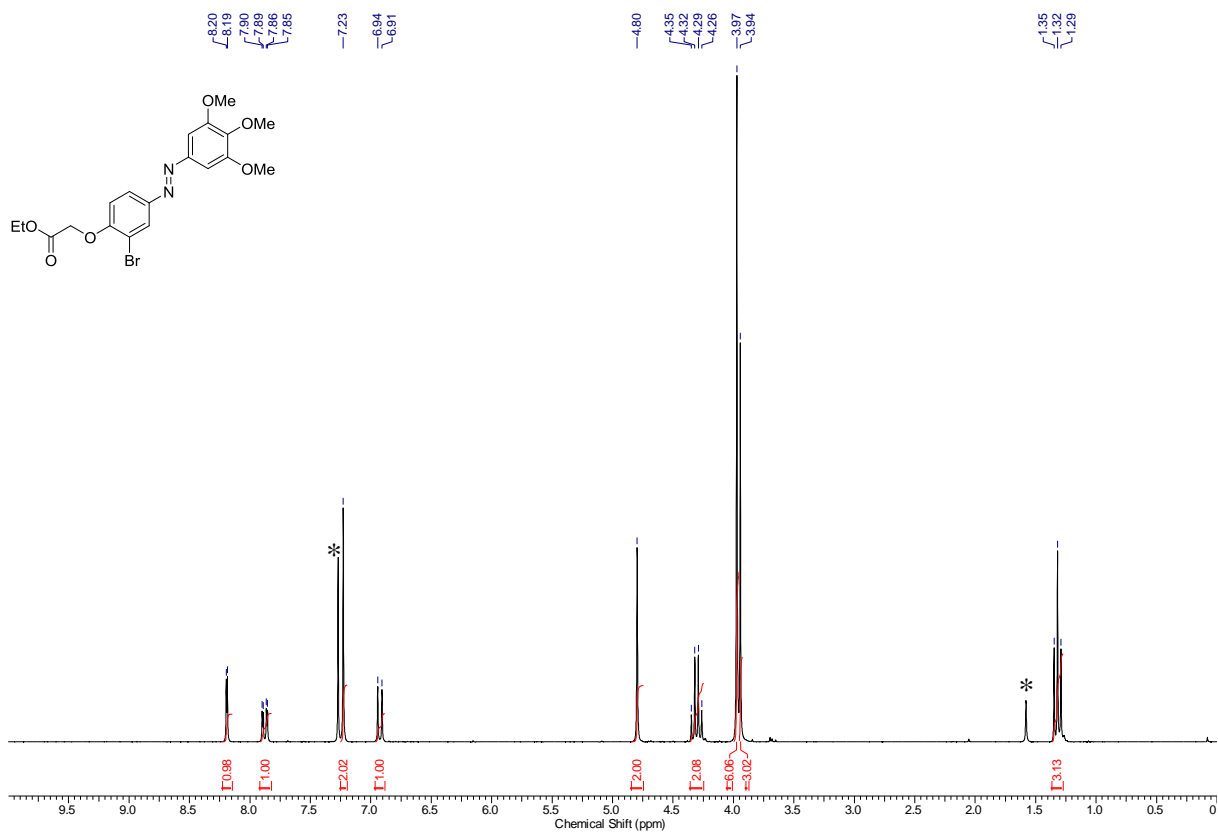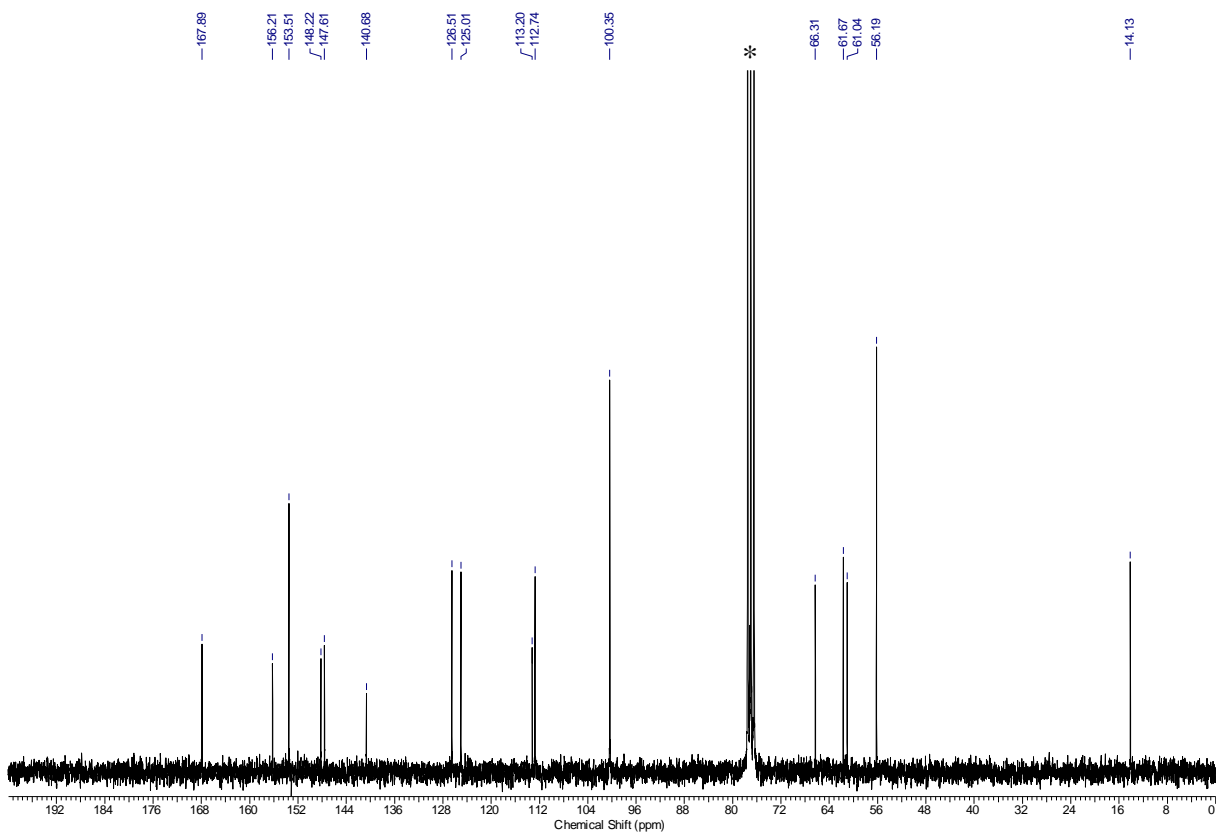

<sup>1</sup>H-NMR (250 MHz, CDCl<sub>3</sub>) and <sup>13</sup>C-NMR (63 MHz, CDCl<sub>3</sub>) spectrum of compound **10b**. \* = NMR-solvent, H<sub>2</sub>O



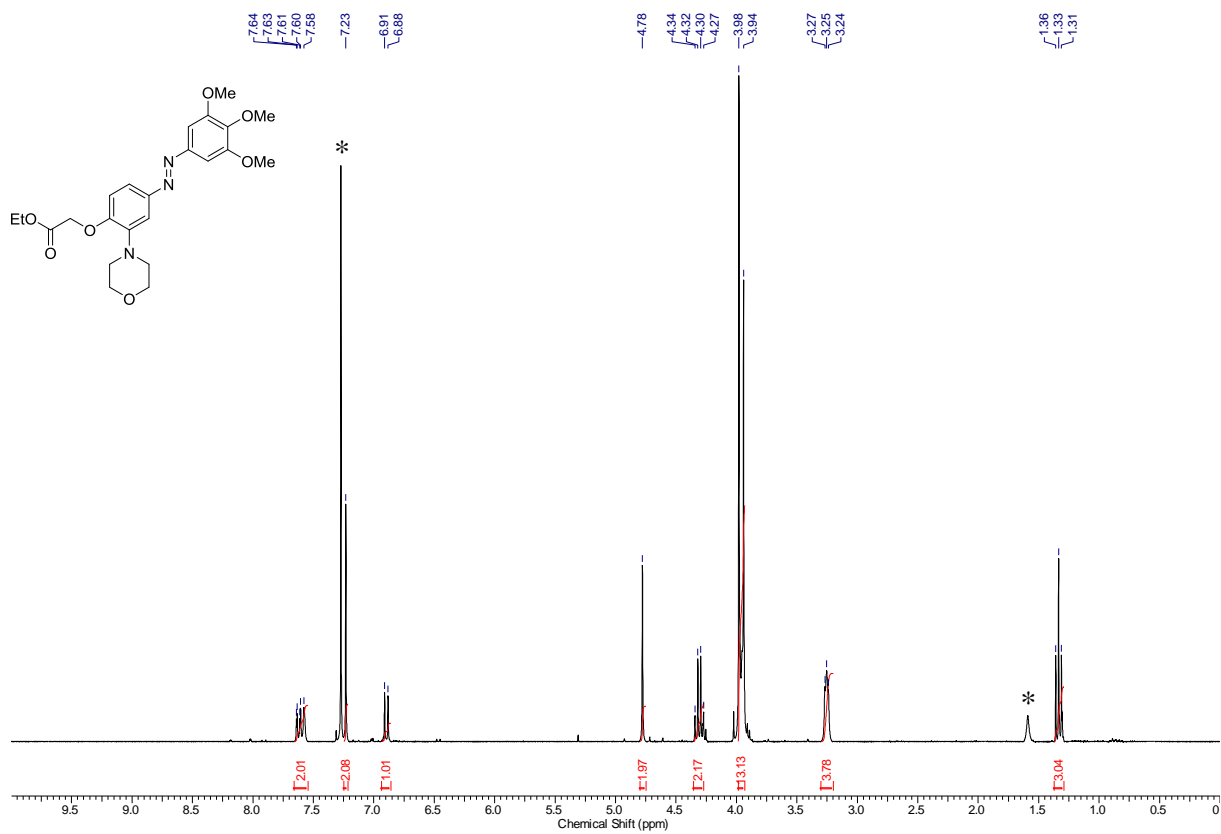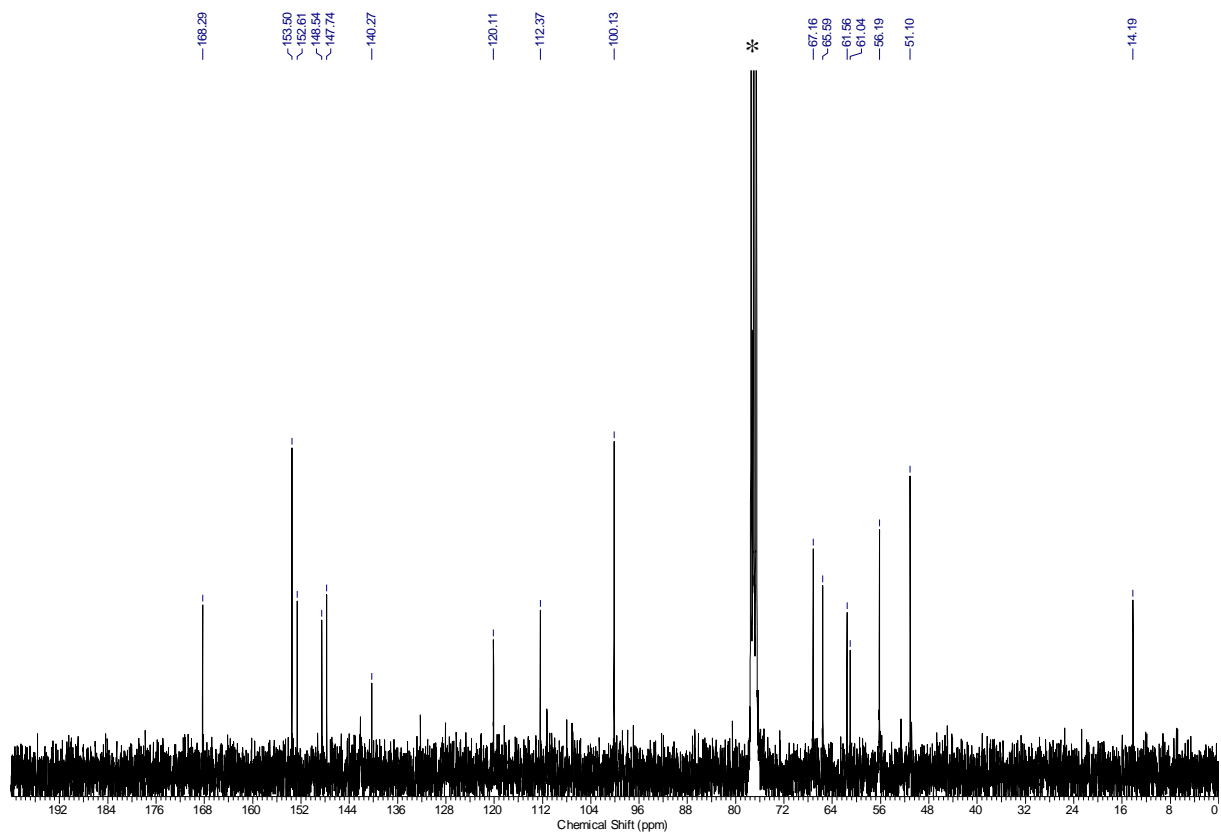

<sup>1</sup>H-NMR (250 MHz, CDCl<sub>3</sub>) and <sup>13</sup>C-NMR (63 MHz, CDCl<sub>3</sub>) spectrum of compound **10c**. \* = NMR-solvent, H<sub>2</sub>O



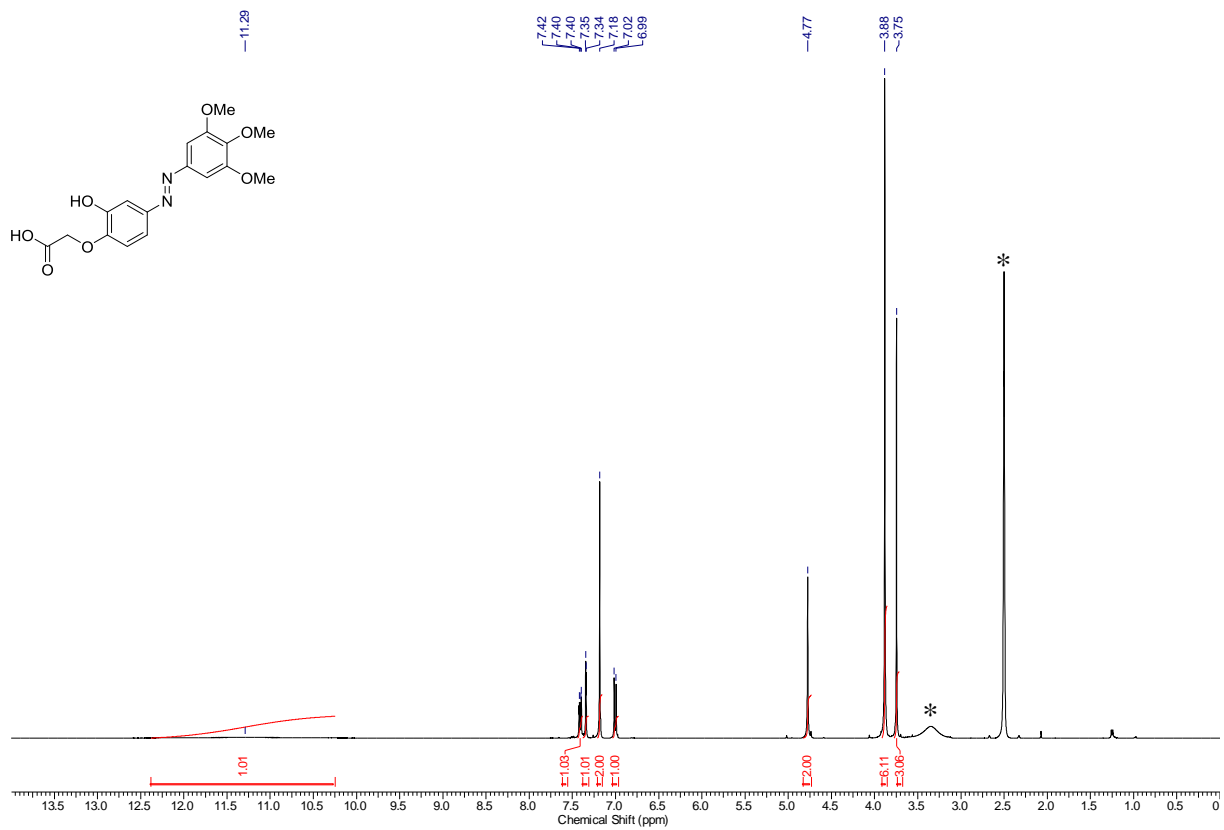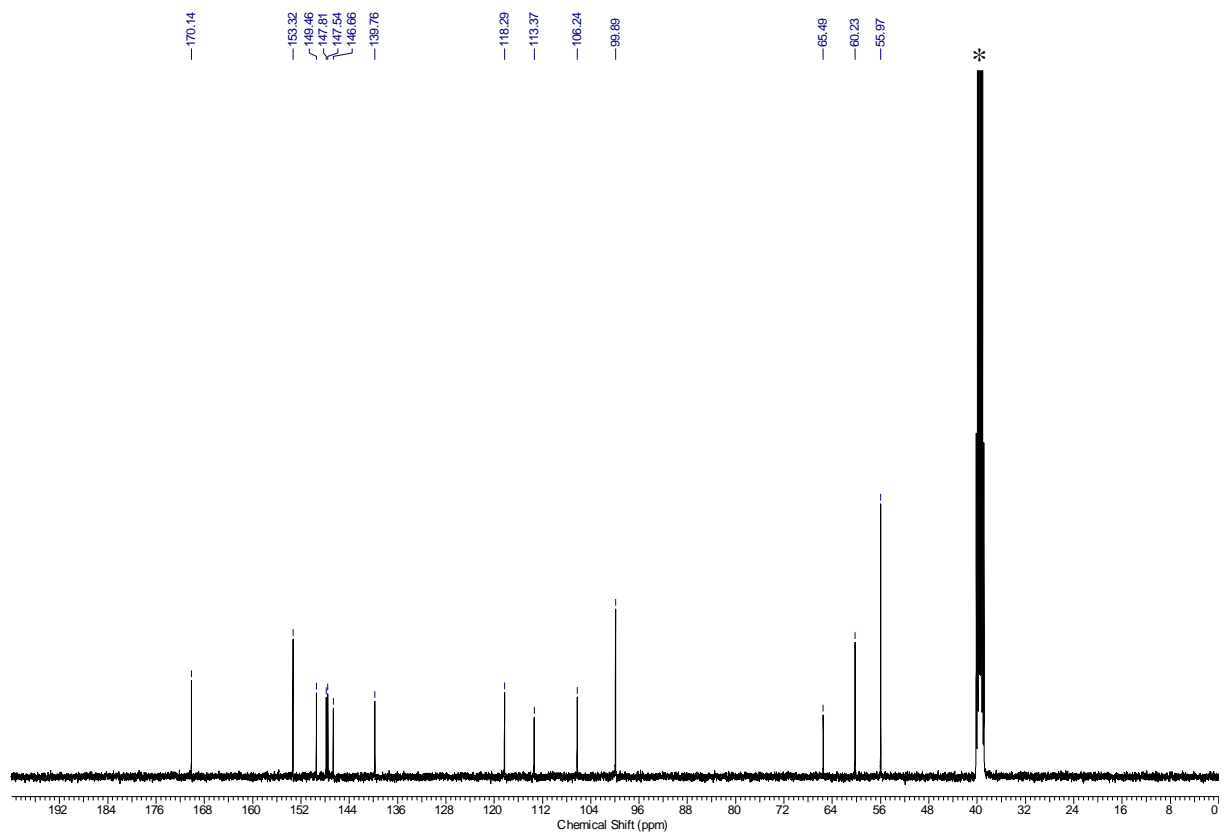

<sup>1</sup>H-NMR (400 MHz, DMSO-d<sub>6</sub>) and <sup>13</sup>C-NMR (101 MHz, DMSO-d<sub>6</sub>) spectrum of compound **10d**. \* = NMR-solvent, H<sub>2</sub>O

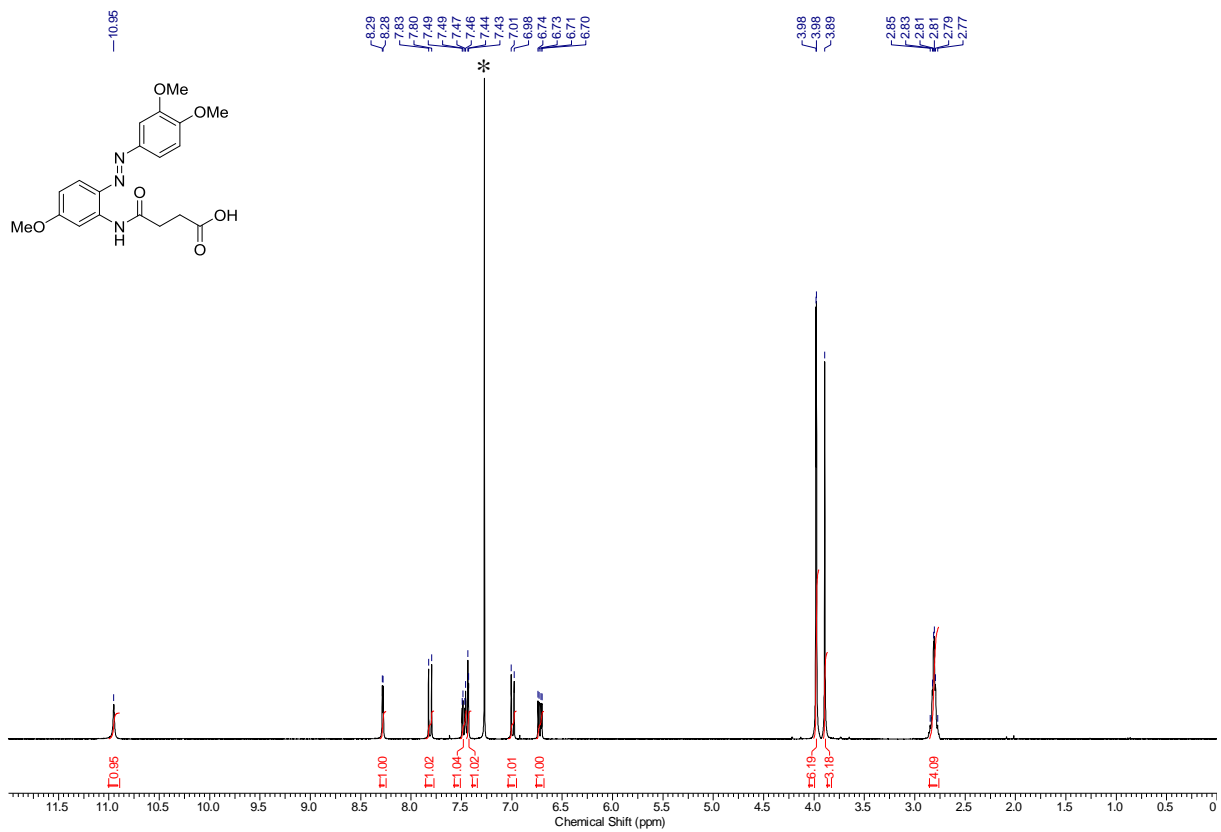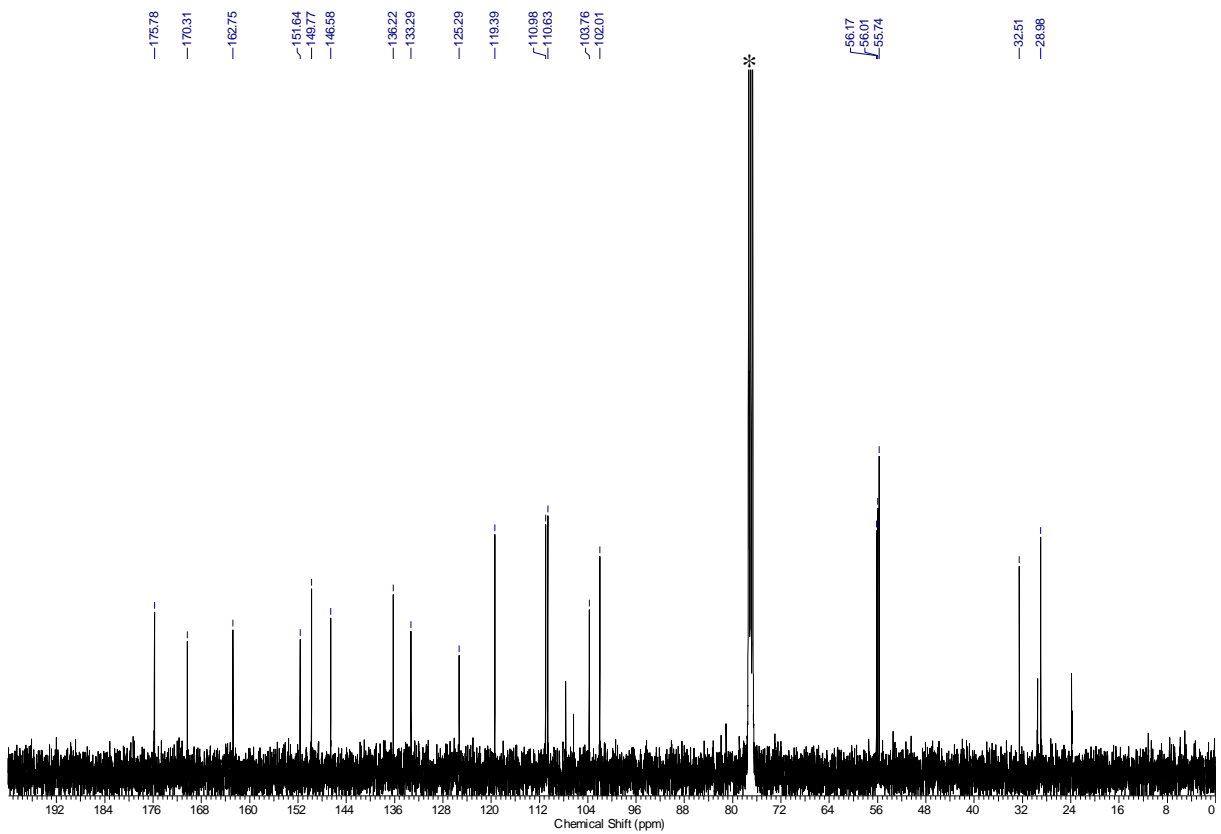

<sup>1</sup>H-NMR (300 MHz, CDCl<sub>3</sub>) and <sup>13</sup>C-NMR (101 MHz, CDCl<sub>3</sub>) spectrum of compound **11a**. \* = NMR-solvent

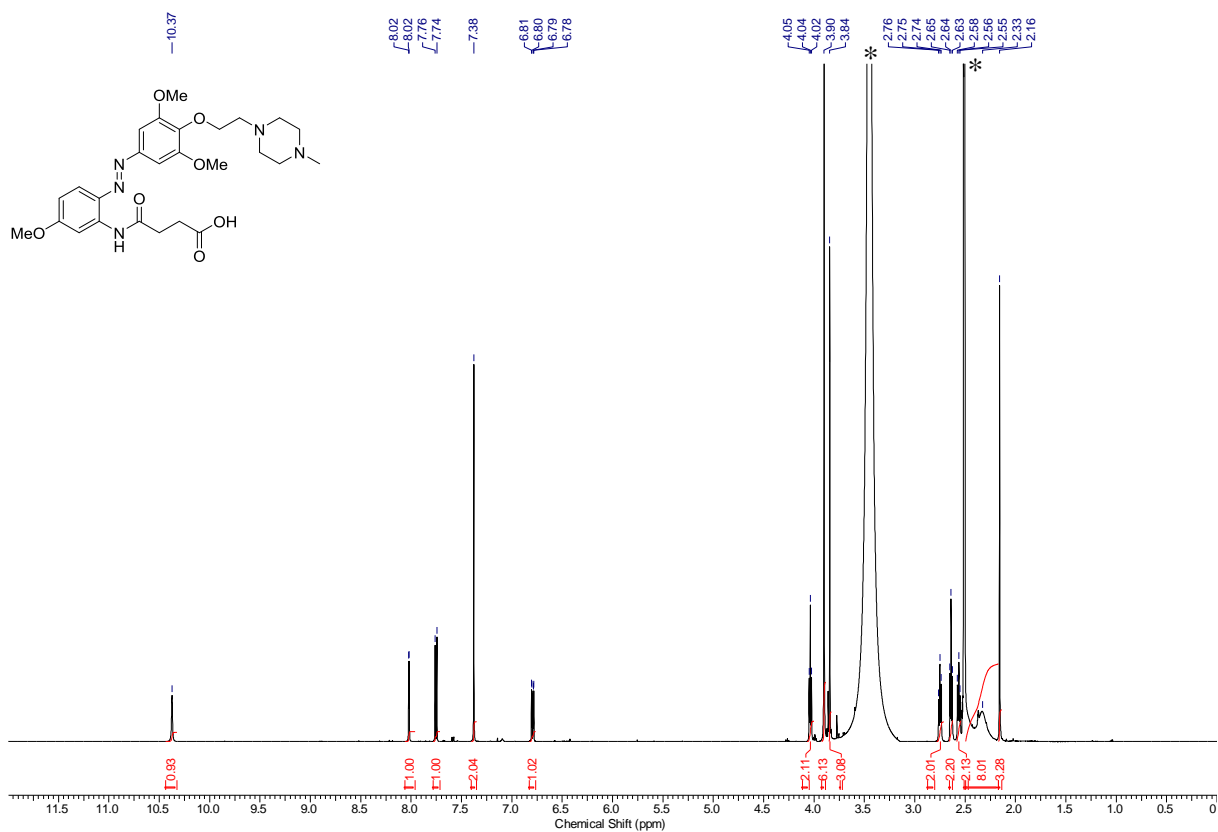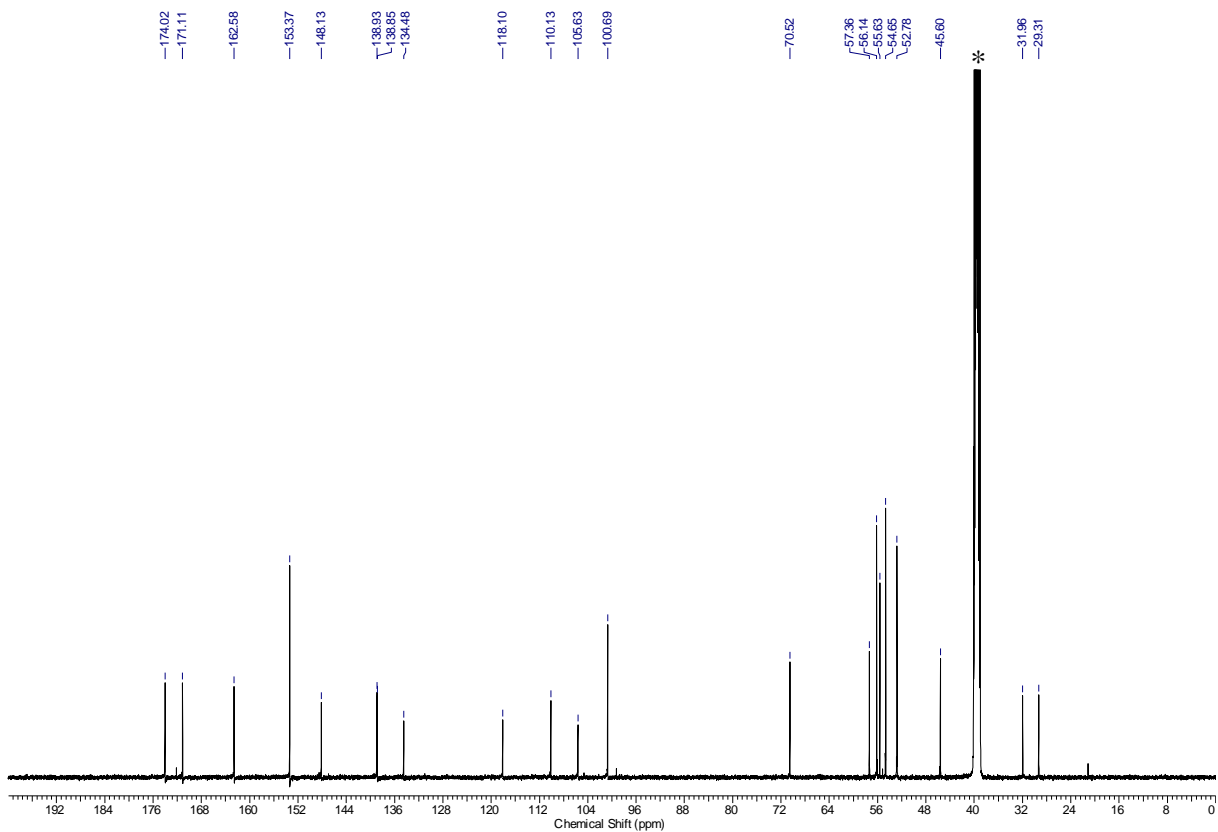

<sup>1</sup>H-NMR (500 MHz, DMSO-*d*<sub>6</sub>) and <sup>13</sup>C-NMR (126 MHz, DMSO-*d*<sub>6</sub>) spectrum of compound **11b**. \* = NMR-solvent, H<sub>2</sub>O

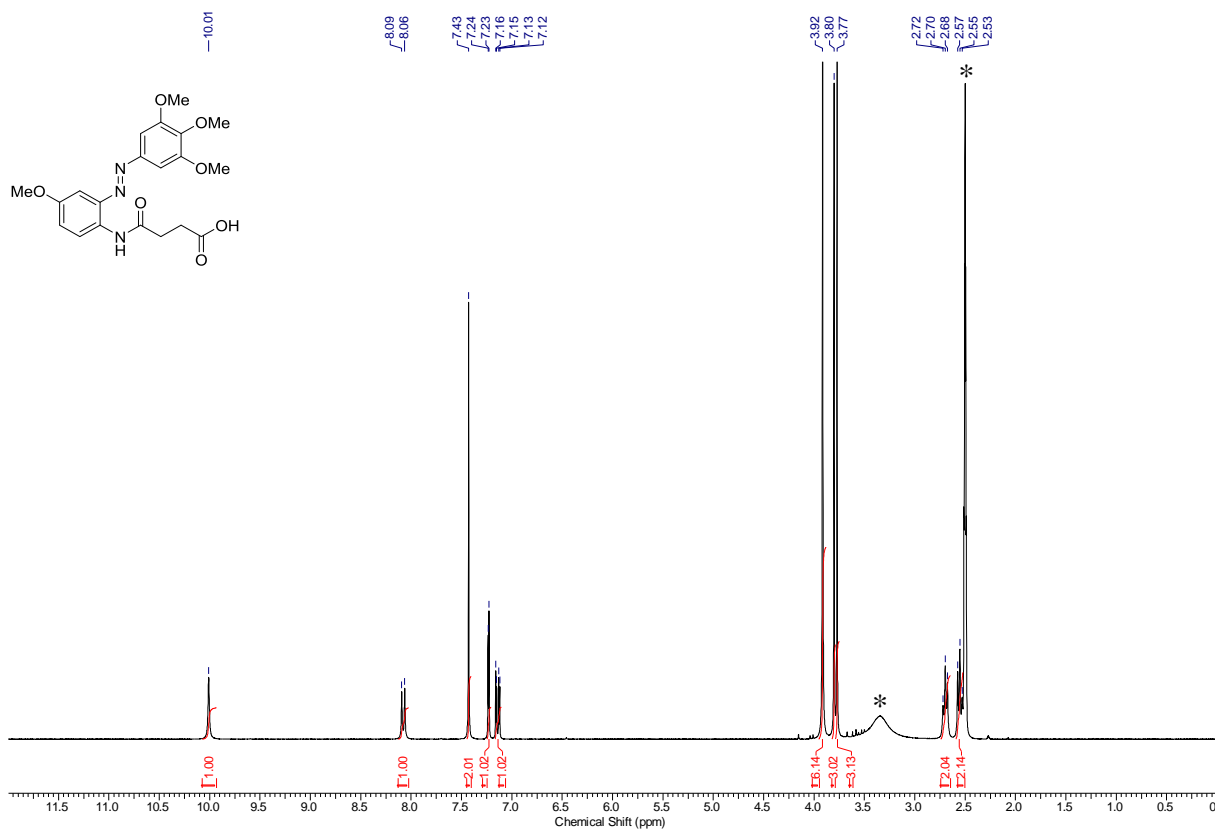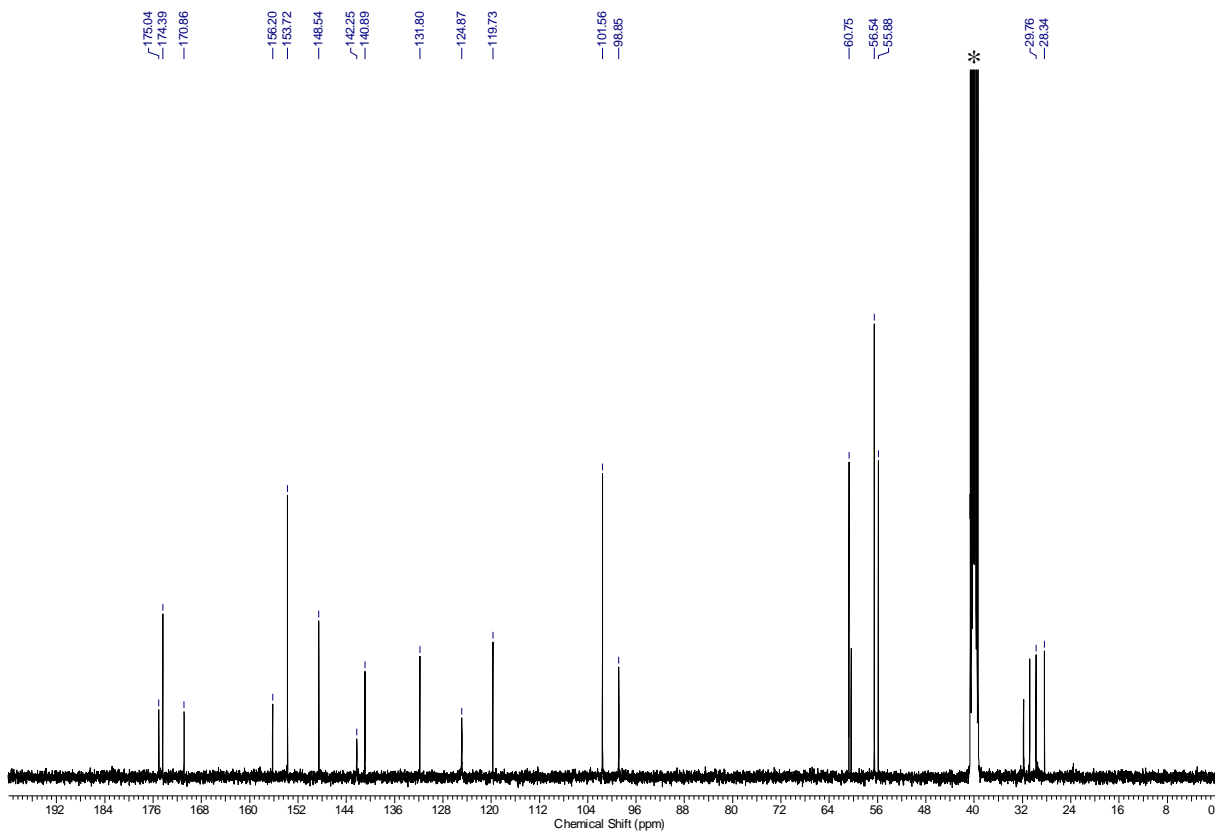

<sup>1</sup>H-NMR (300 MHz, DMSO-*d*<sub>6</sub>) and <sup>13</sup>C-NMR (101 MHz, DMSO-*d*<sub>6</sub>) spectrum of compound **11c**. \* = NMR-solvent, H<sub>2</sub>O

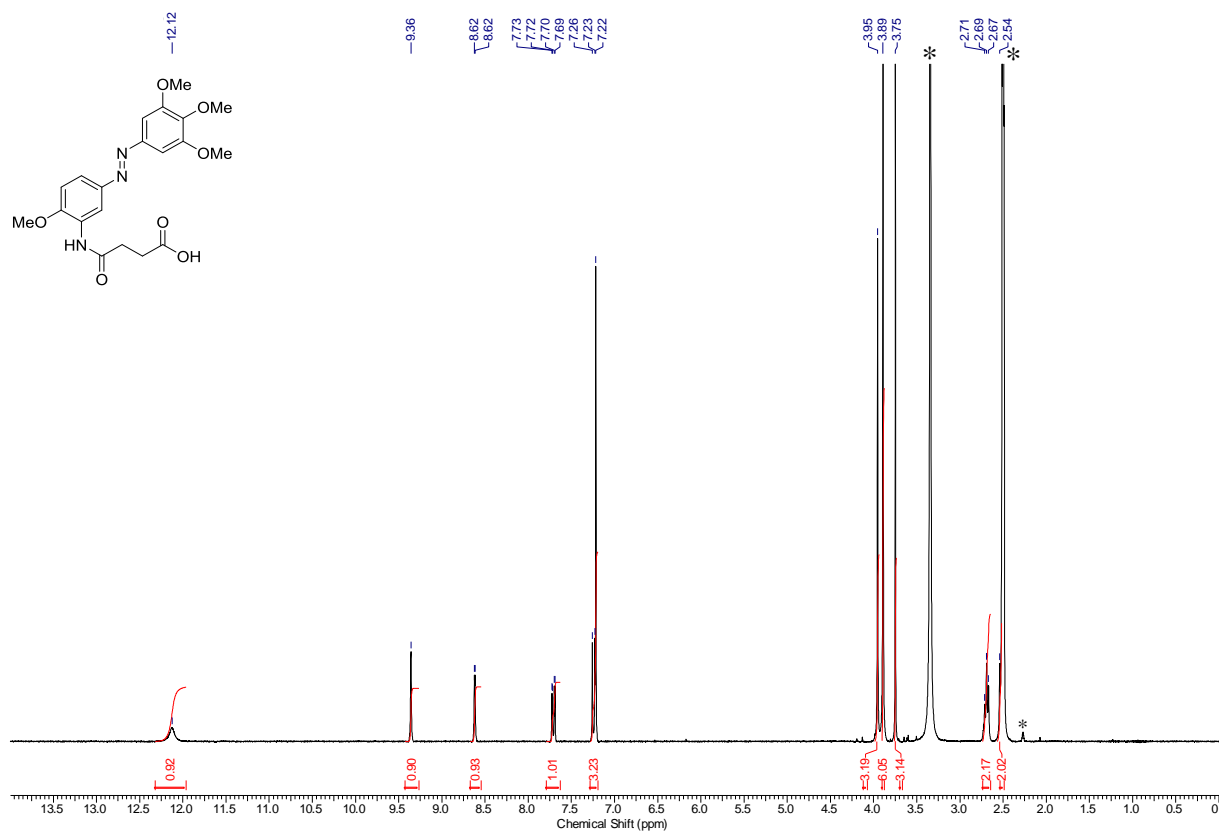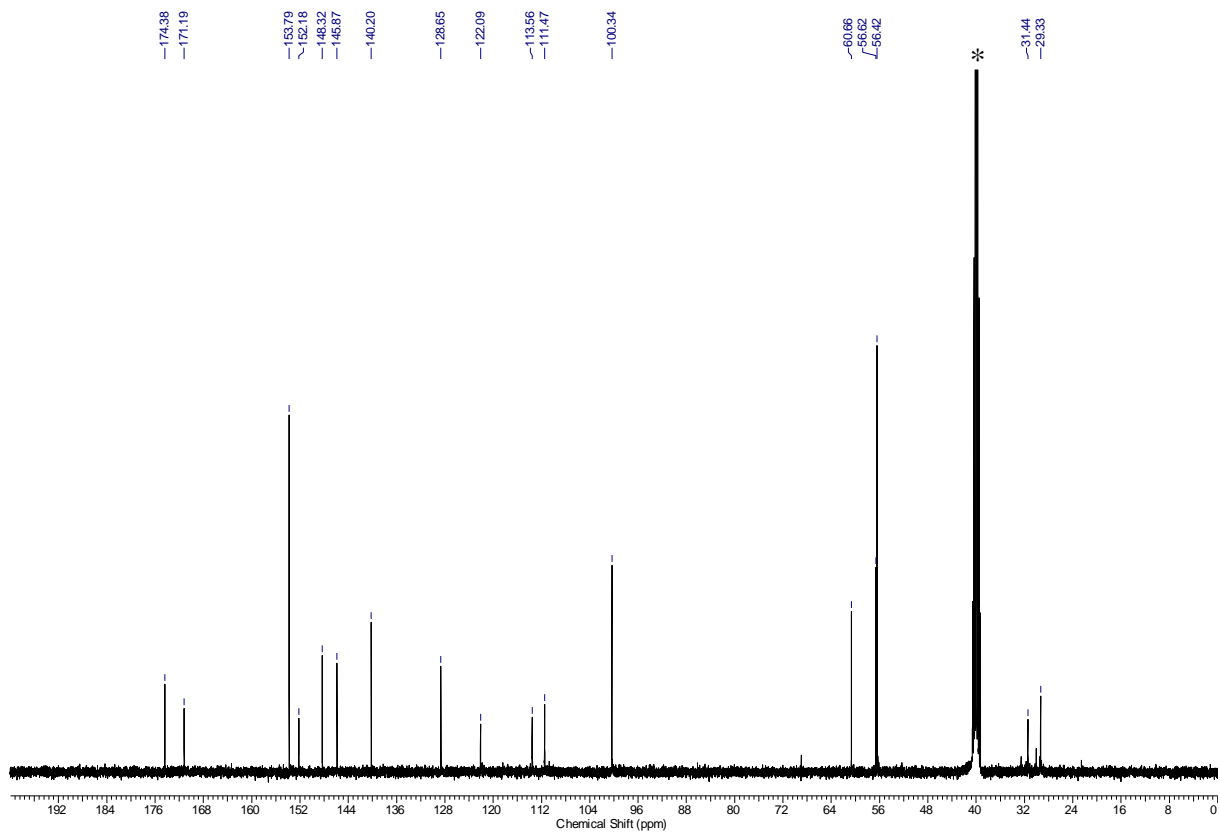

<sup>1</sup>H-NMR (300 MHz, DMSO-*d*<sub>6</sub>) and <sup>13</sup>C-NMR (101 MHz, DMSO-*d*<sub>6</sub>) spectrum of compound 12. \* = NMR-solvent, H<sub>2</sub>O

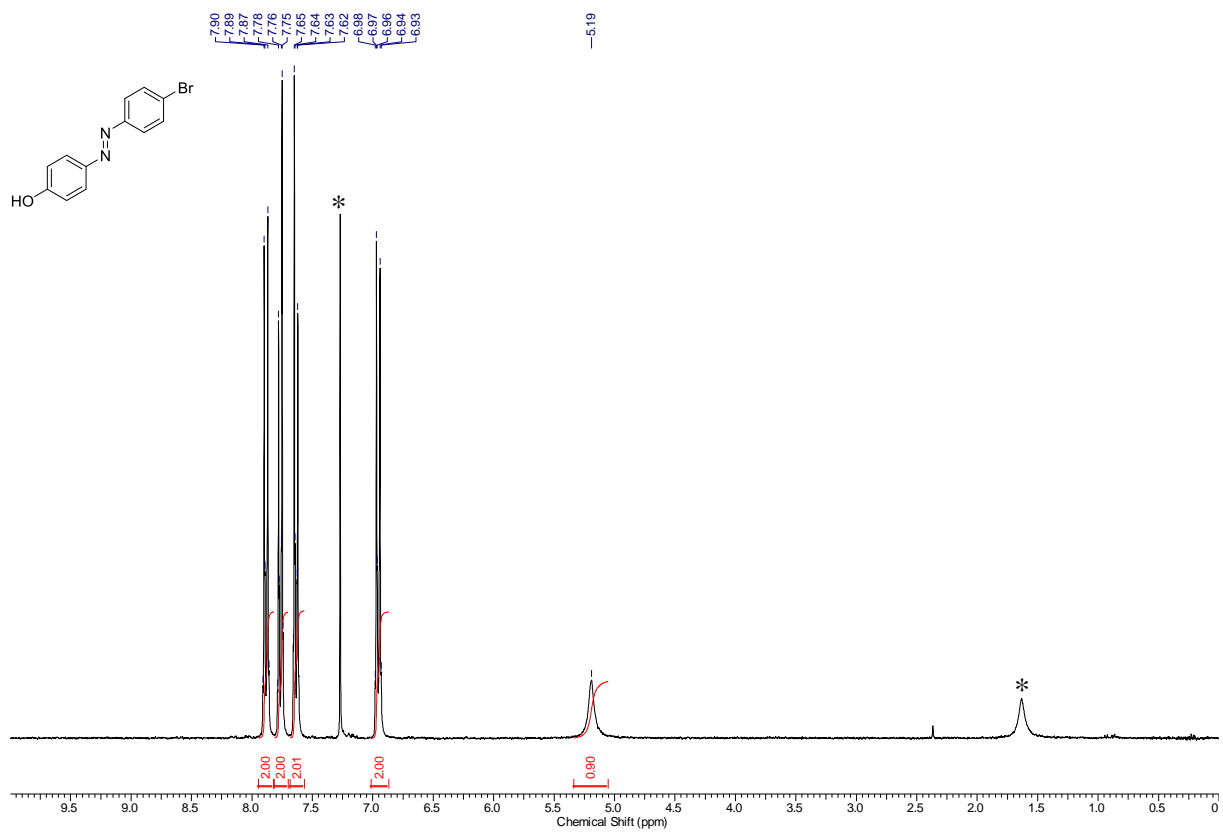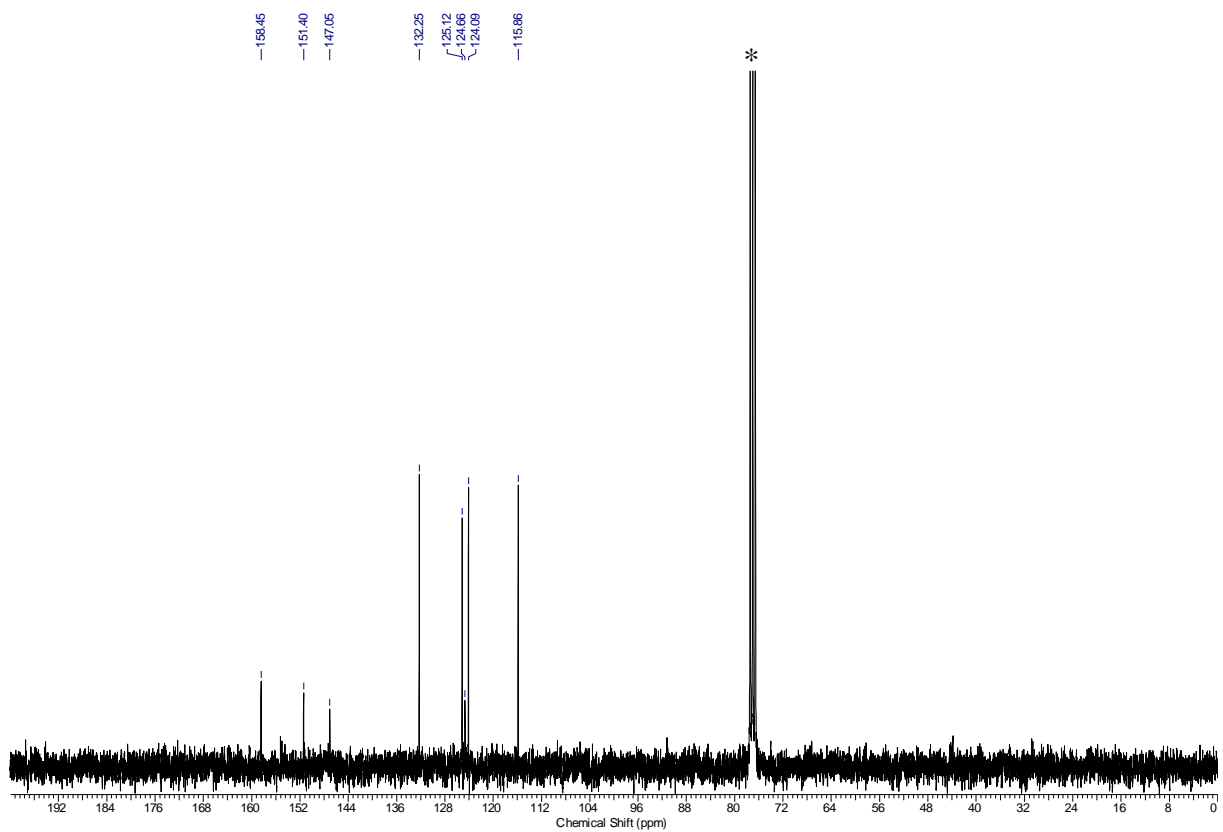

<sup>1</sup>H-NMR (300 MHz, CDCl<sub>3</sub>) and <sup>13</sup>C-NMR (75 MHz, CDCl<sub>3</sub>) spectrum of compound **15**. \* = NMR-solvent, H<sub>2</sub>O



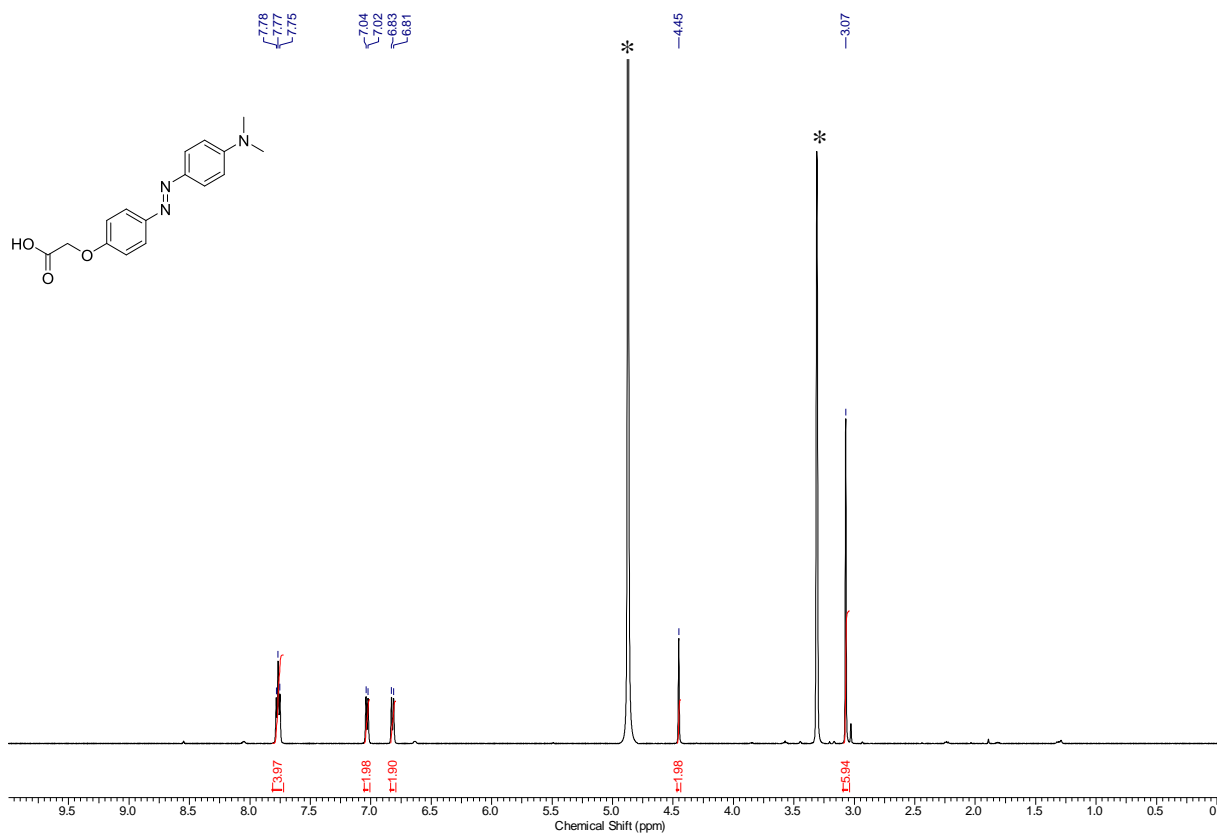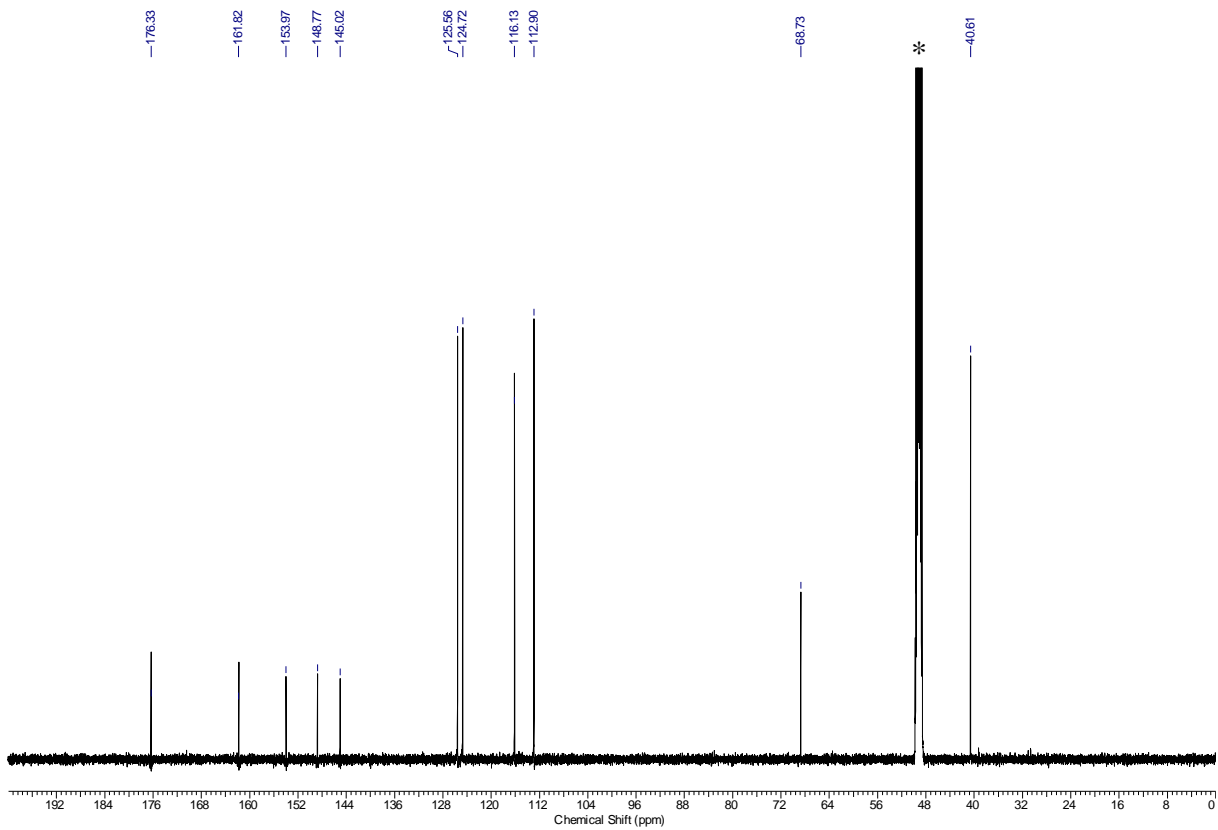

<sup>1</sup>H-NMR (500 MHz, CD<sub>3</sub>OD) and <sup>13</sup>C-NMR (126 MHz, CD<sub>3</sub>OD) spectrum of compound **16b**. \* = NMR-solvent, H<sub>2</sub>O

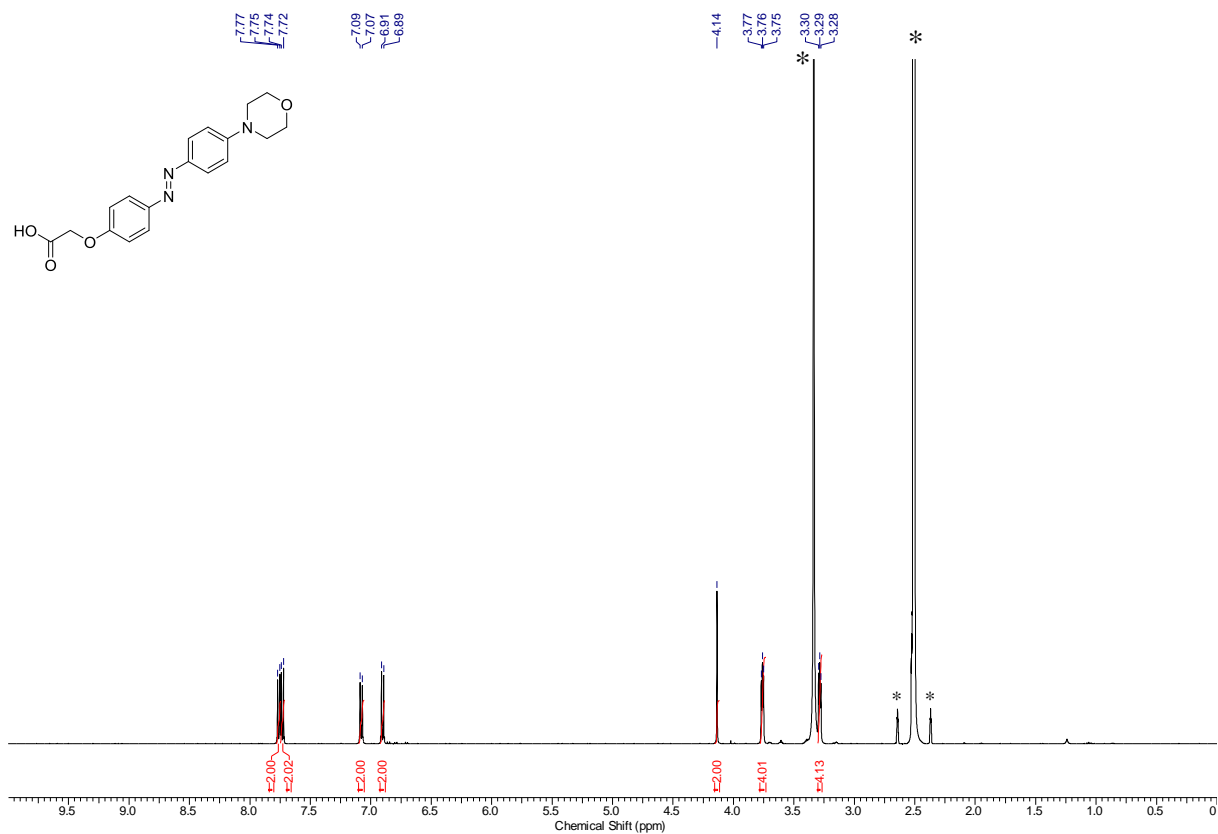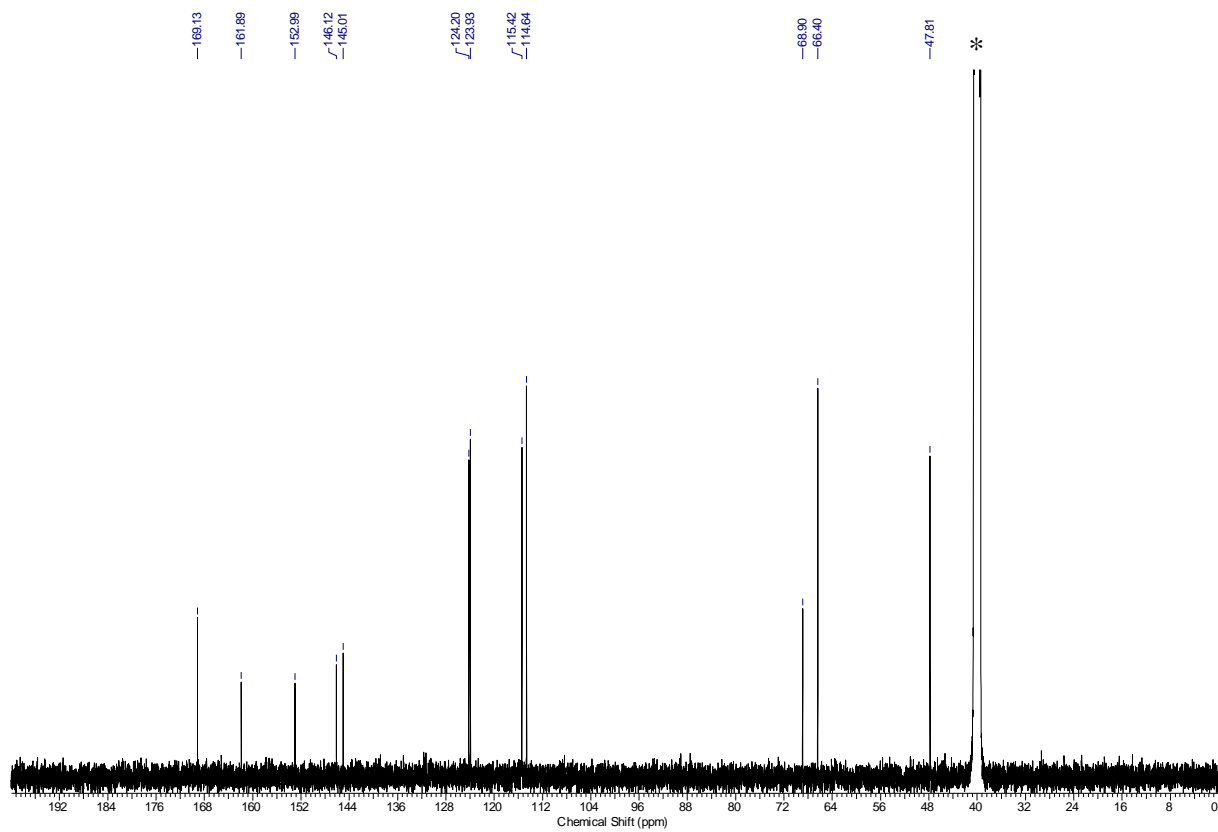

<sup>1</sup>H-NMR (500 MHz, DMSO-*d*<sub>6</sub>) and <sup>13</sup>C-NMR (126 MHz, DMSO-*d*<sub>6</sub>) spectrum of compound **16c**. \* = NMR-solvent, H<sub>2</sub>O

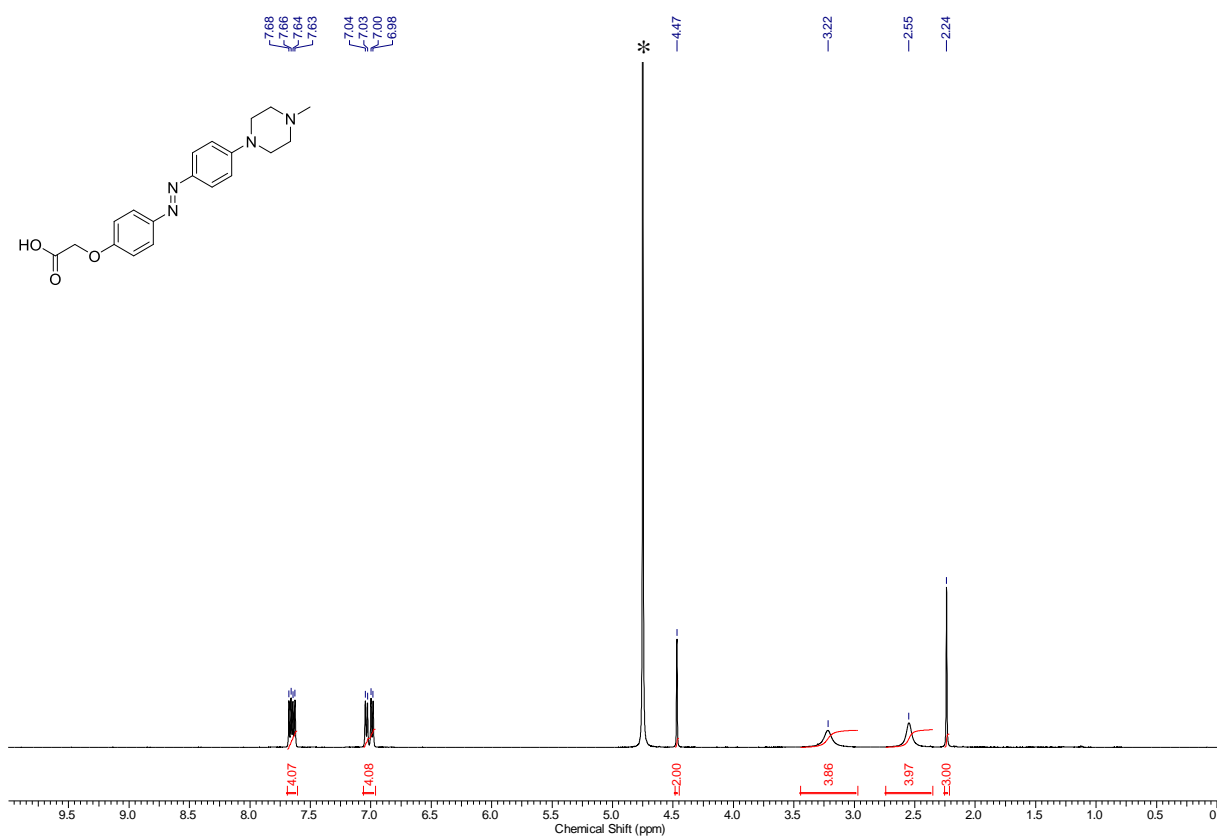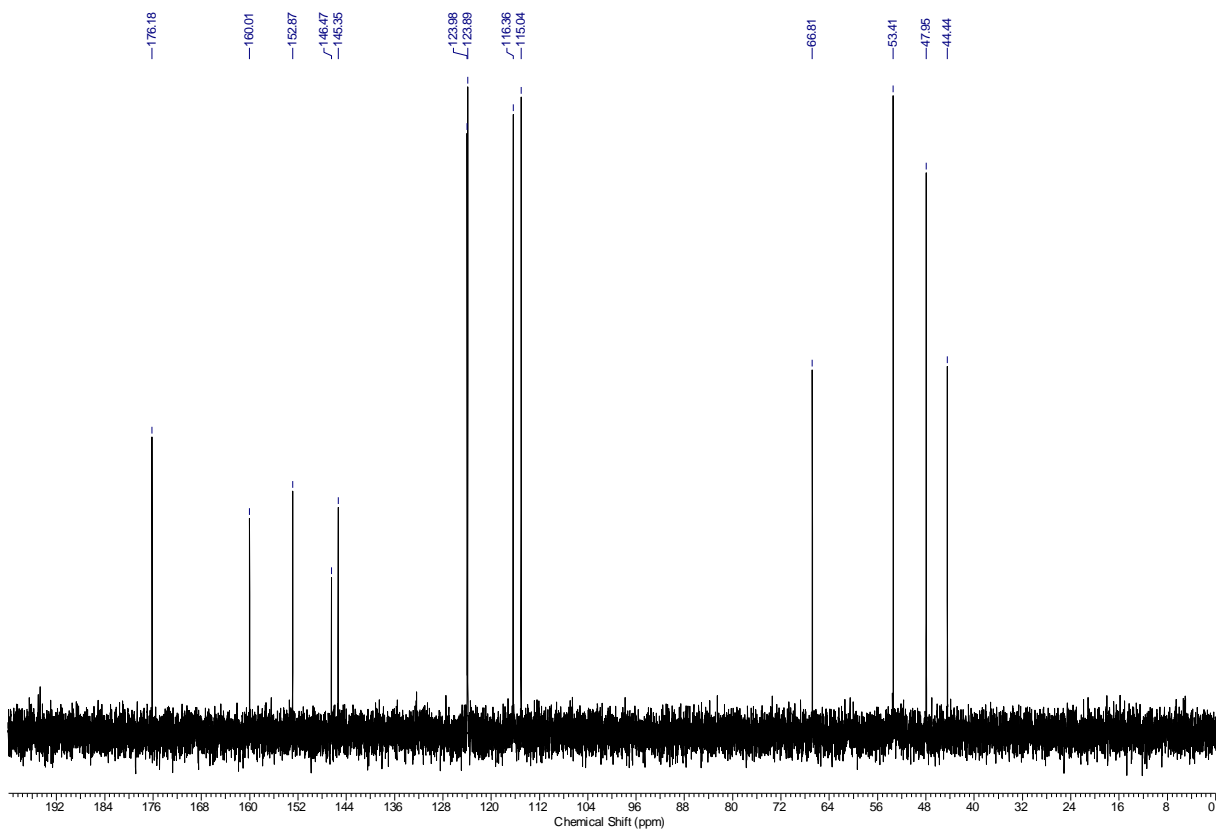

$^1\text{H-NMR}$  (500 MHz,  $\text{D}_2\text{O}$ ) and  $^{13}\text{C-NMR}$  (126 MHz,  $\text{D}_2\text{O}$ ) spectrum of compound **16d**. \* = NMR-solvent

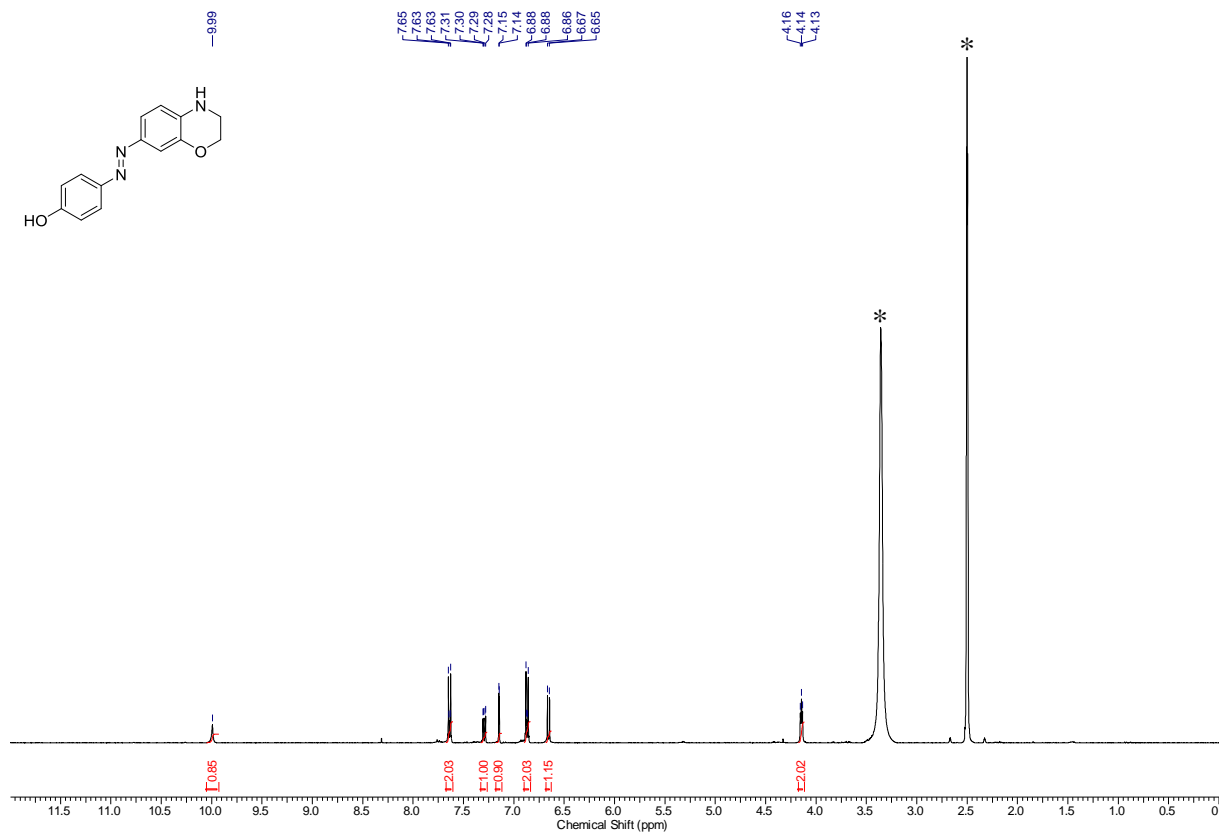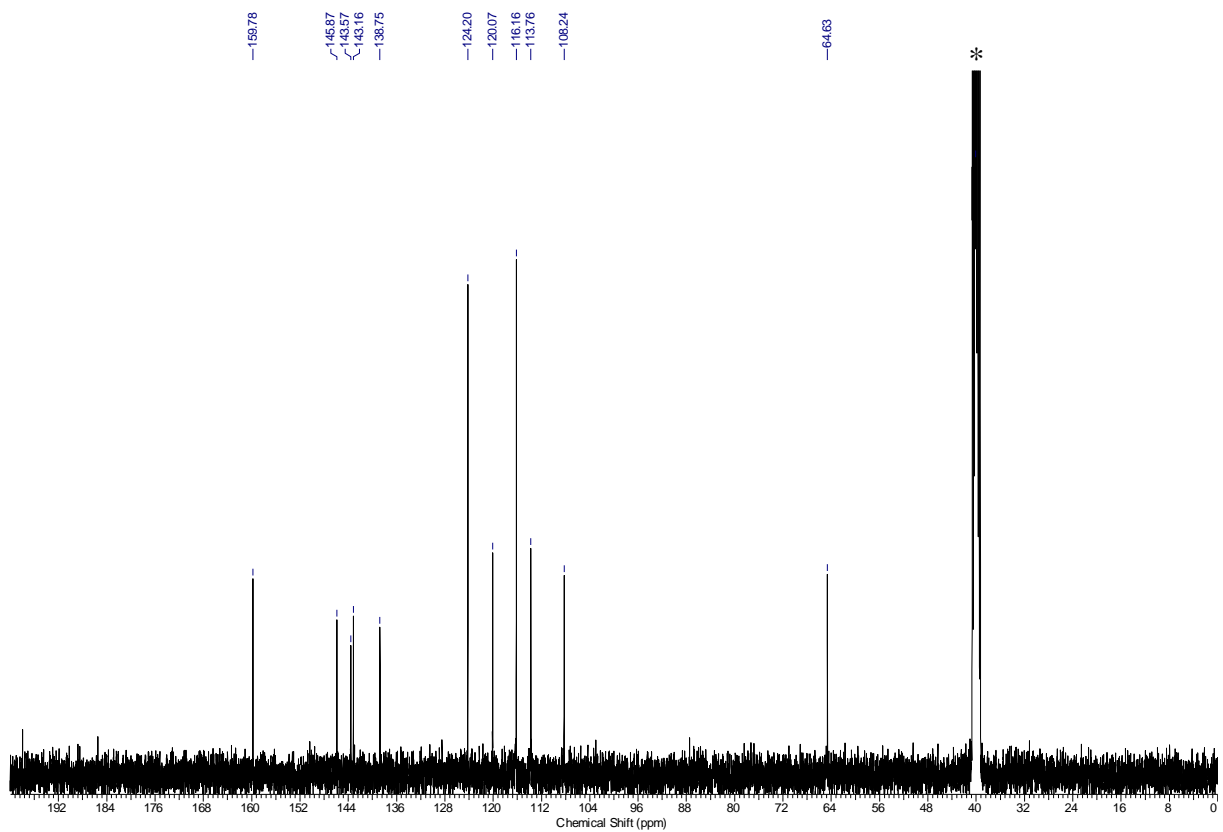

<sup>1</sup>H-NMR (400 MHz, DMSO-*d*<sub>6</sub>) and <sup>13</sup>C-NMR (101 MHz, DMSO-*d*<sub>6</sub>) spectrum of compound 18. \* = H<sub>2</sub>O

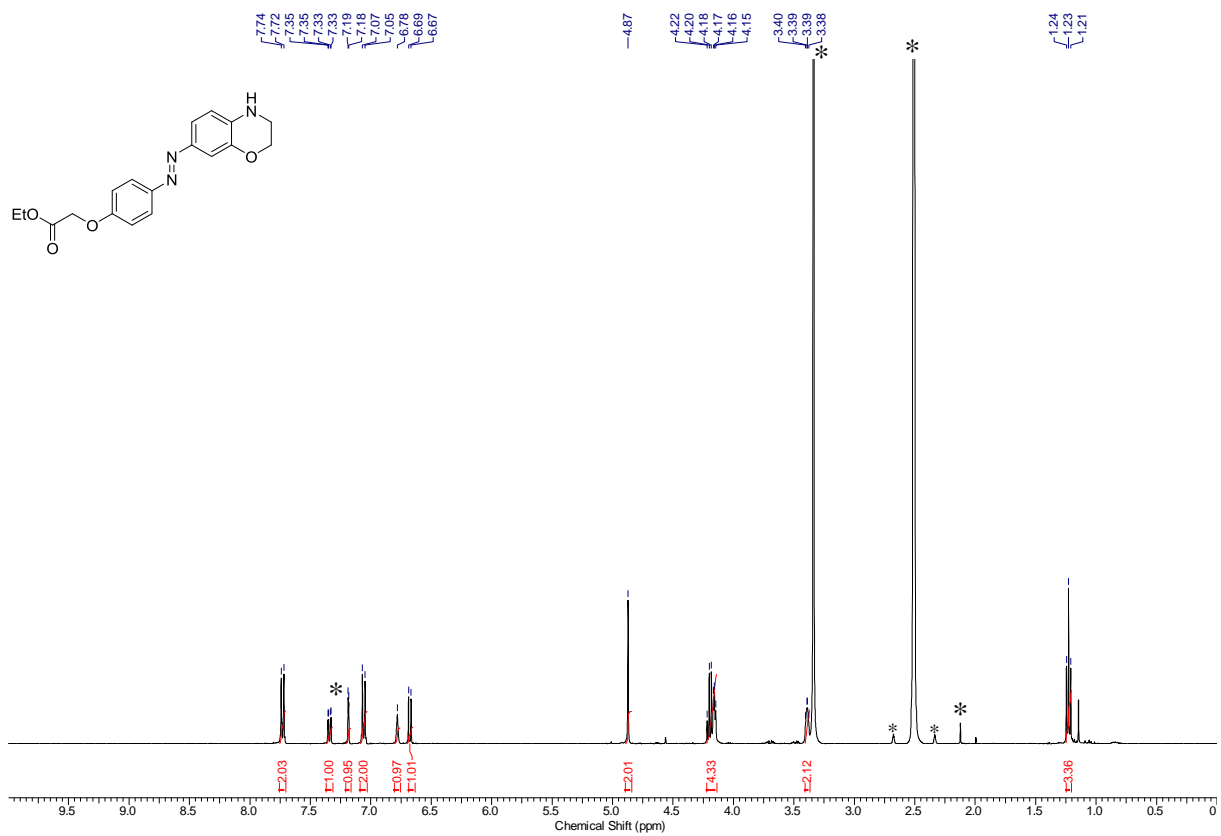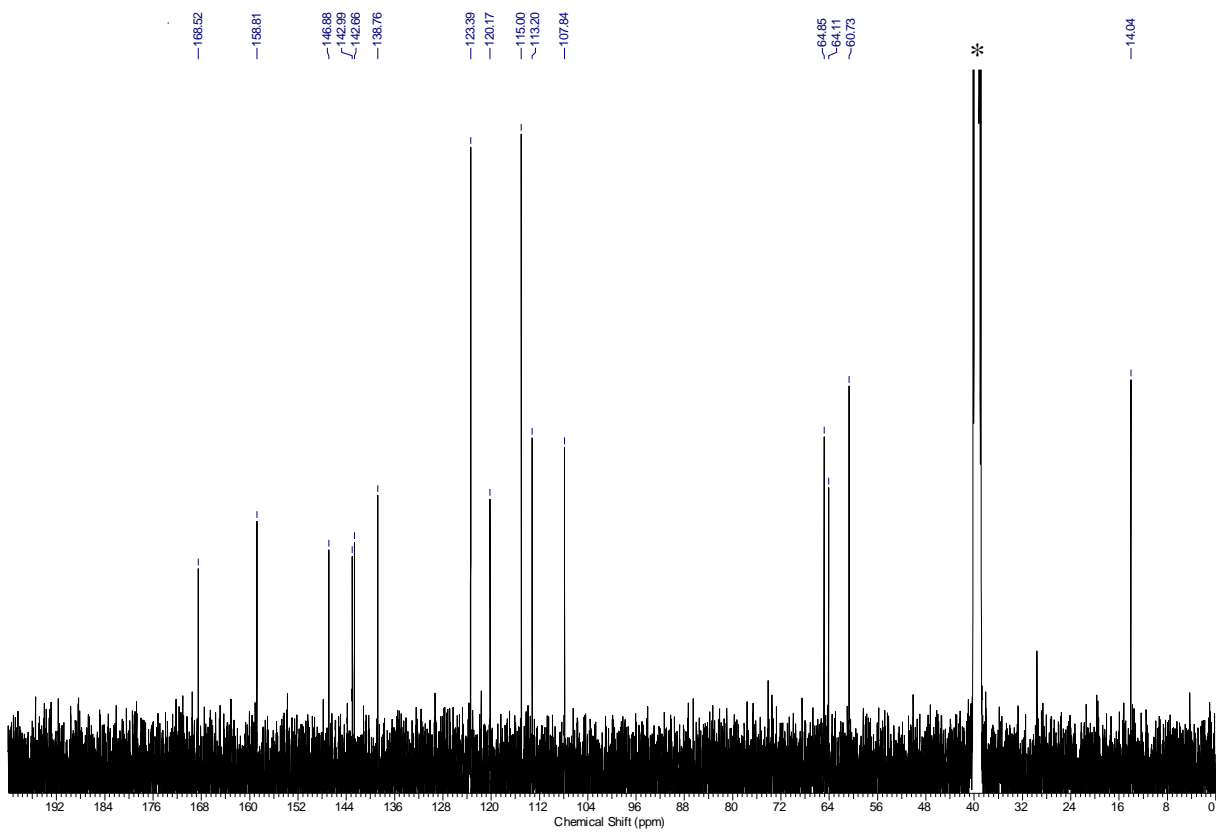

<sup>1</sup>H-NMR (400 MHz, DMSO-*d*<sub>6</sub>) and <sup>13</sup>C-NMR (101 MHz, DMSO-*d*<sub>6</sub>) spectrum of compound **19**. \* = NMR-solvent, H<sub>2</sub>O, CH<sub>3</sub>CN

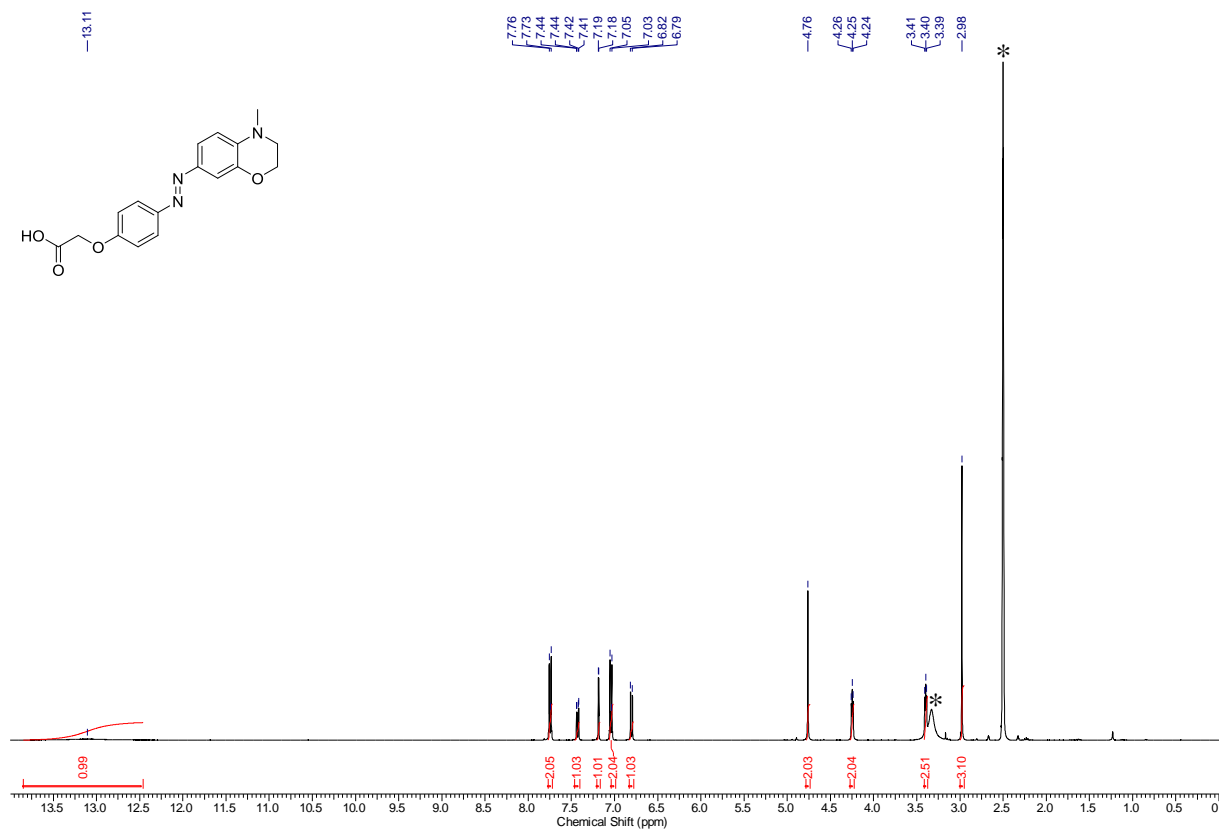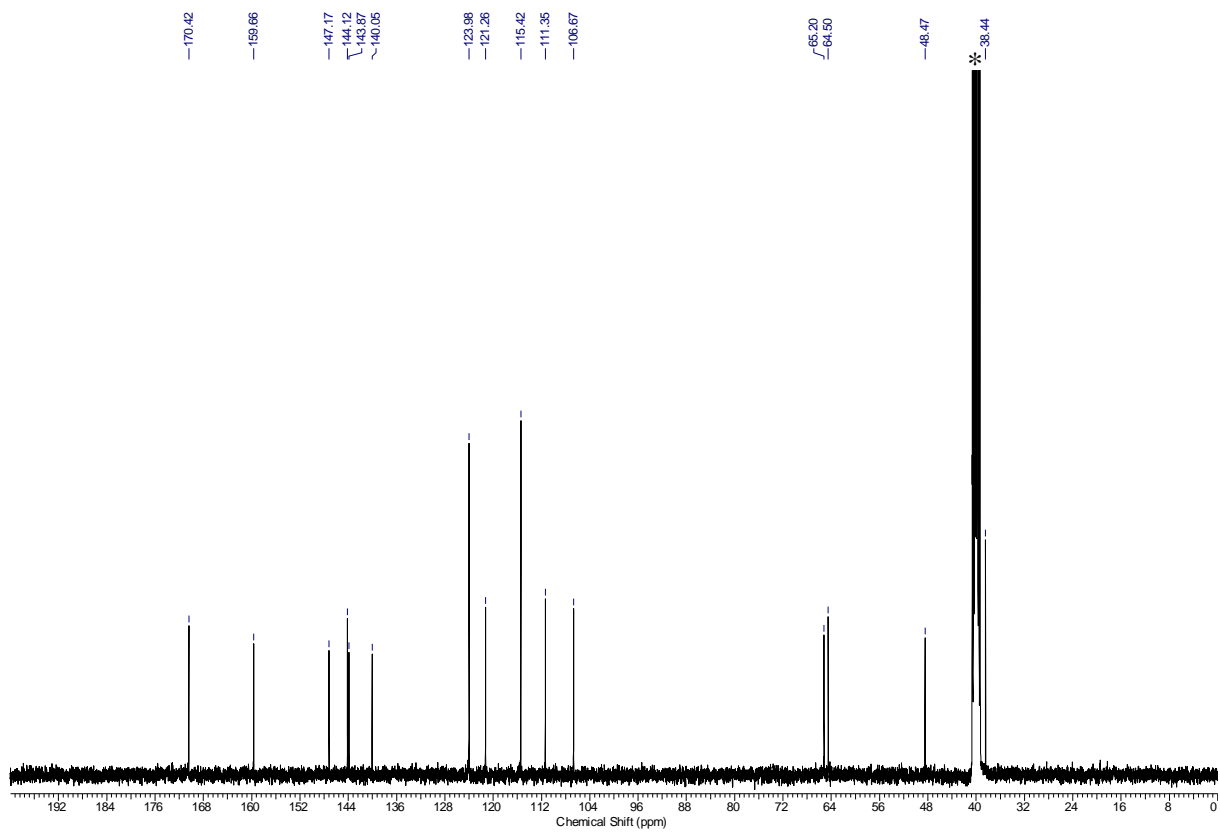

<sup>1</sup>H-NMR (400 MHz, DMSO-*d*<sub>6</sub>) and <sup>13</sup>C-NMR (101 MHz, DMSO-*d*<sub>6</sub>) spectrum of compound **20a**. \* = NMR-solvent, H<sub>2</sub>O

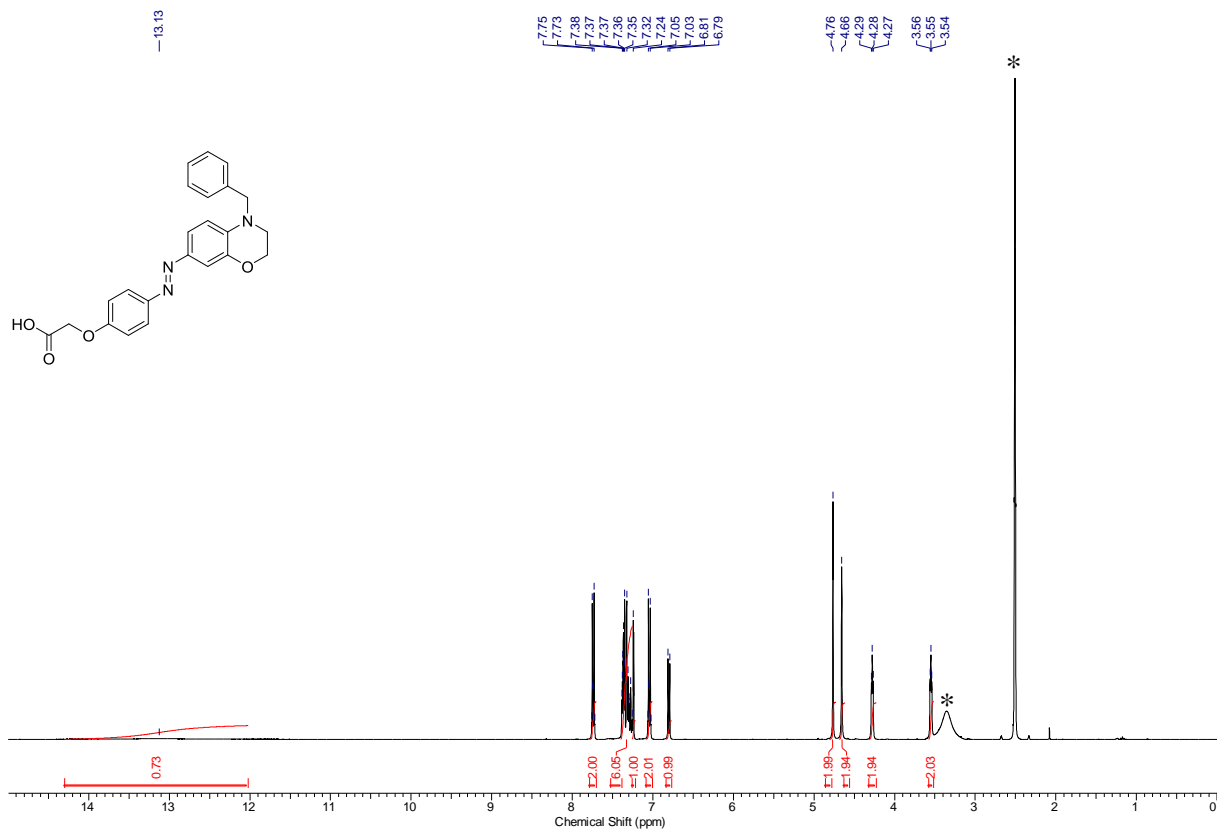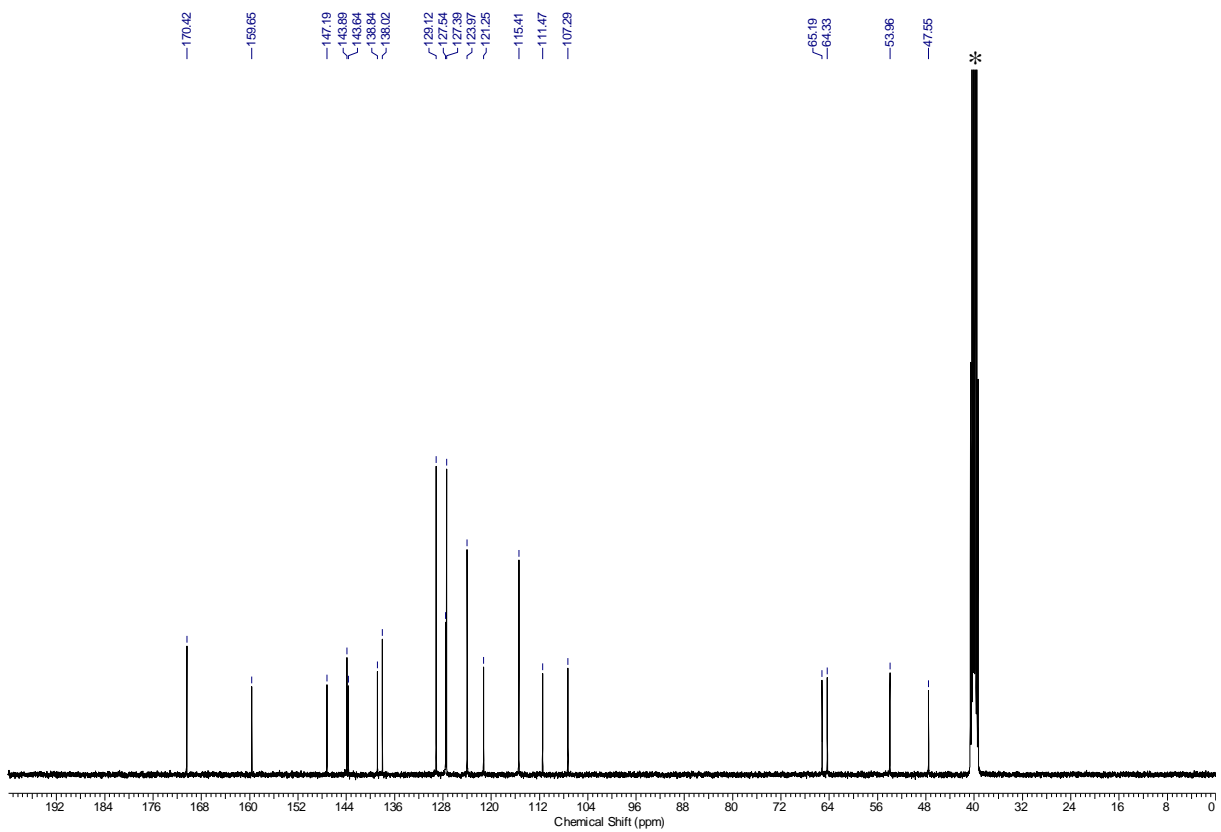

<sup>1</sup>H-NMR (400 MHz, DMSO-*d*<sub>6</sub>) and <sup>13</sup>C-NMR (101 MHz, DMSO-*d*<sub>6</sub>) spectrum of compound **20b**. \* = NMR-solvent, H<sub>2</sub>O

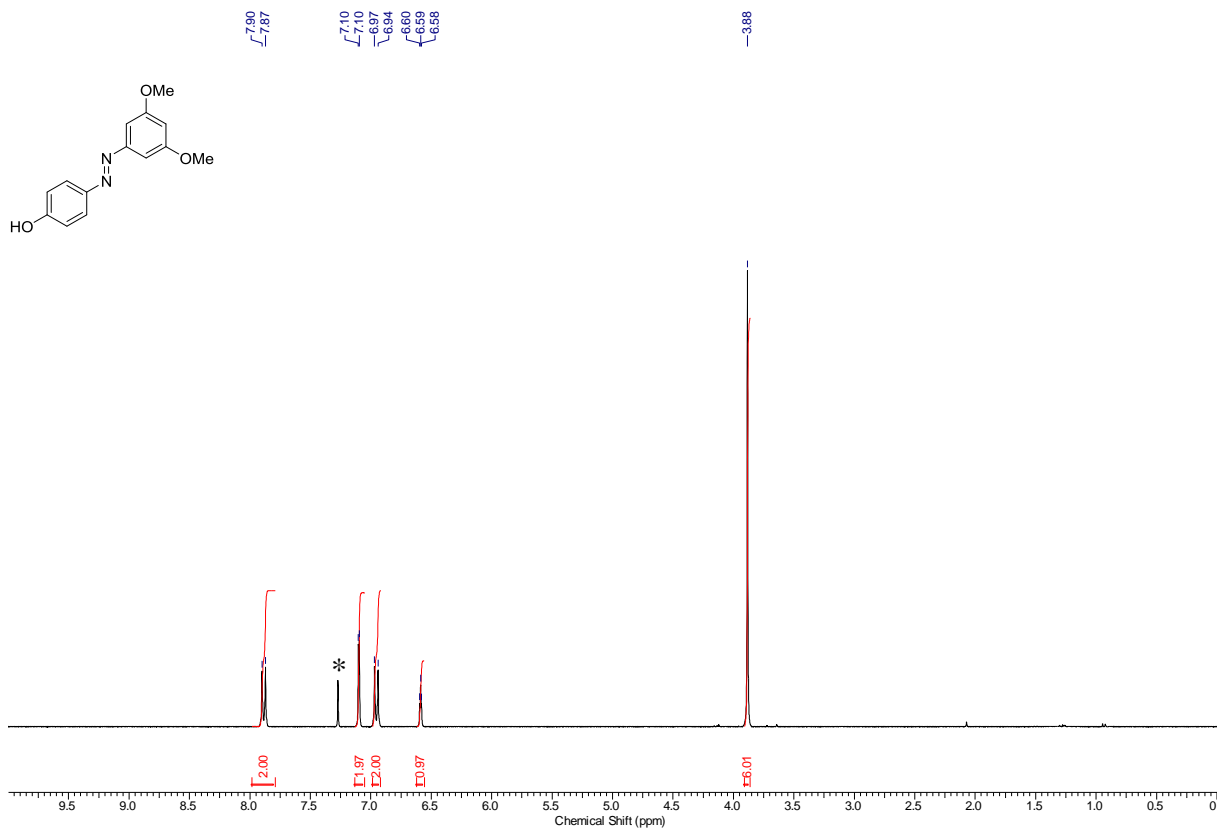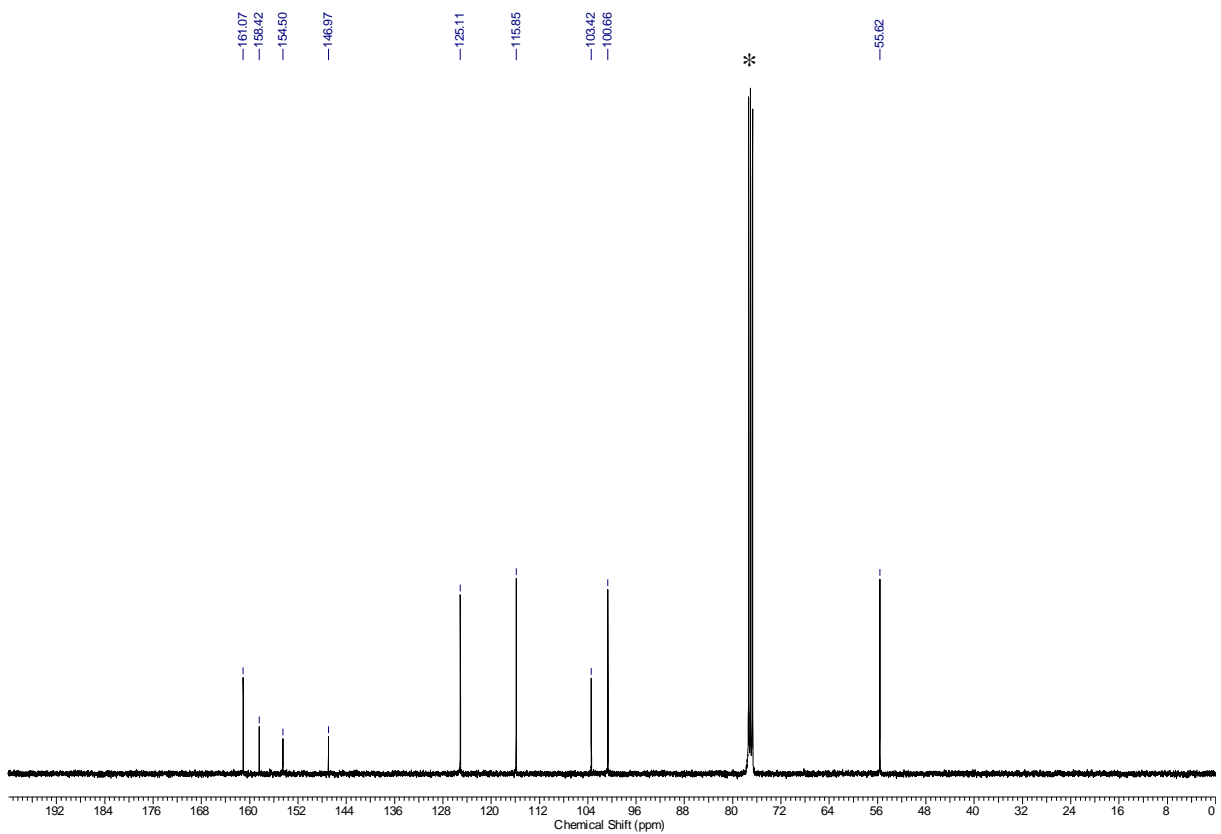

<sup>1</sup>H-NMR (300 MHz, CDCl<sub>3</sub>) and <sup>13</sup>C-NMR (101 MHz, CDCl<sub>3</sub>) spectrum of compound **22**. \* = NMR-solvent



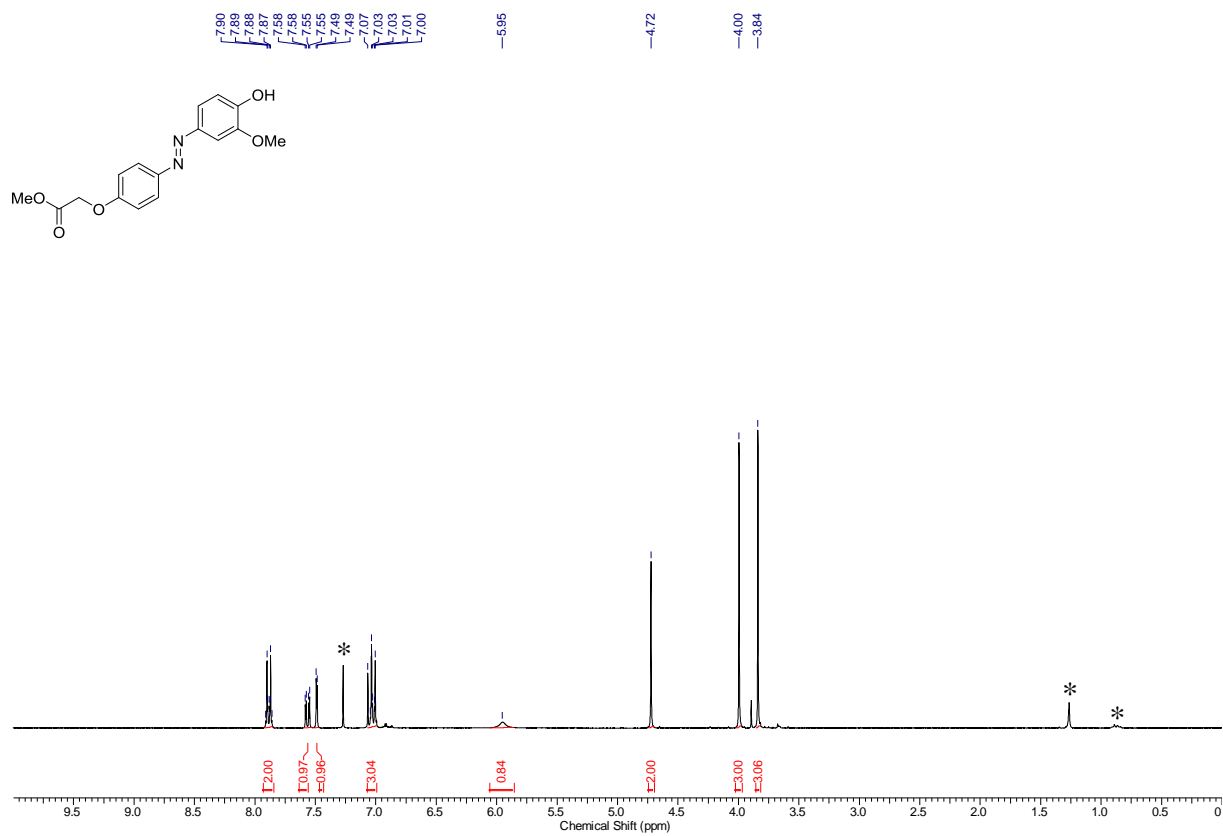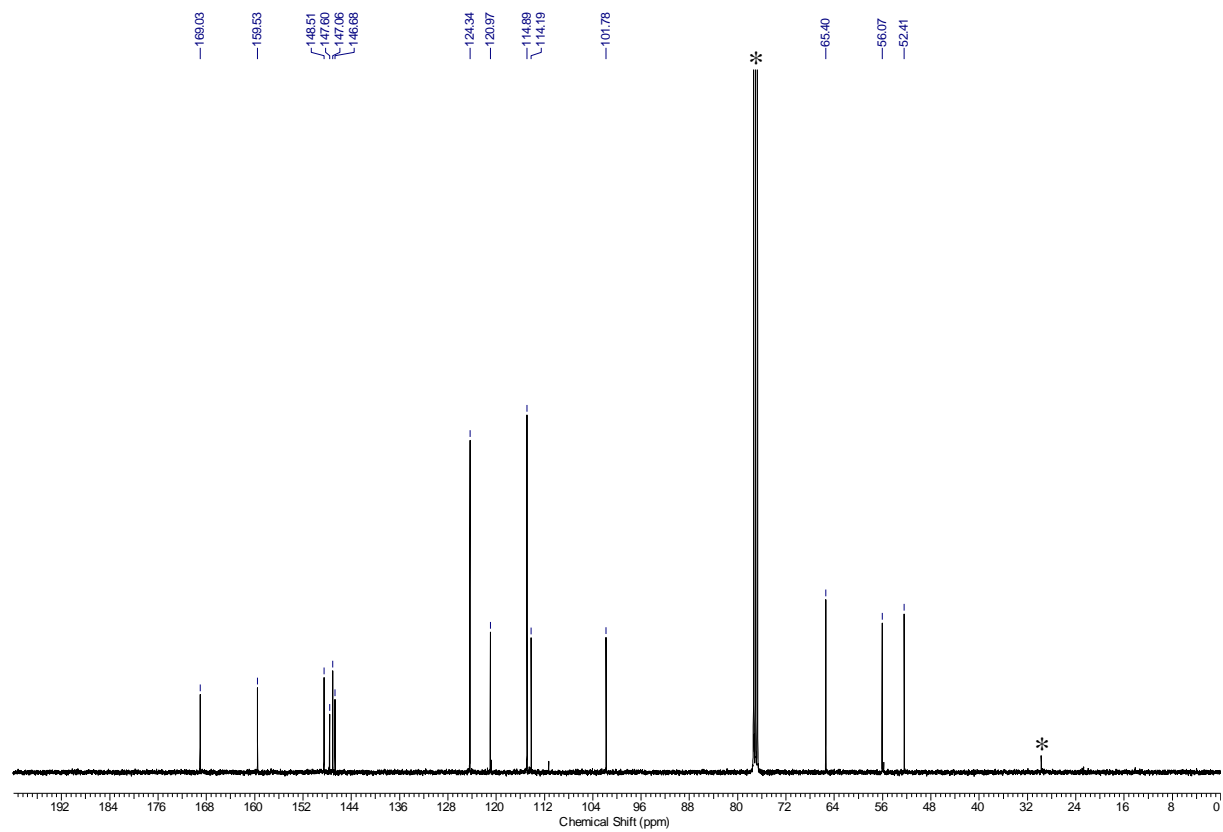

<sup>1</sup>H-NMR (300 MHz, CDCl<sub>3</sub>) and <sup>13</sup>C-NMR (101 MHz, CDCl<sub>3</sub>) spectrum of compound **25a**. \* = NMR-solvent, grease

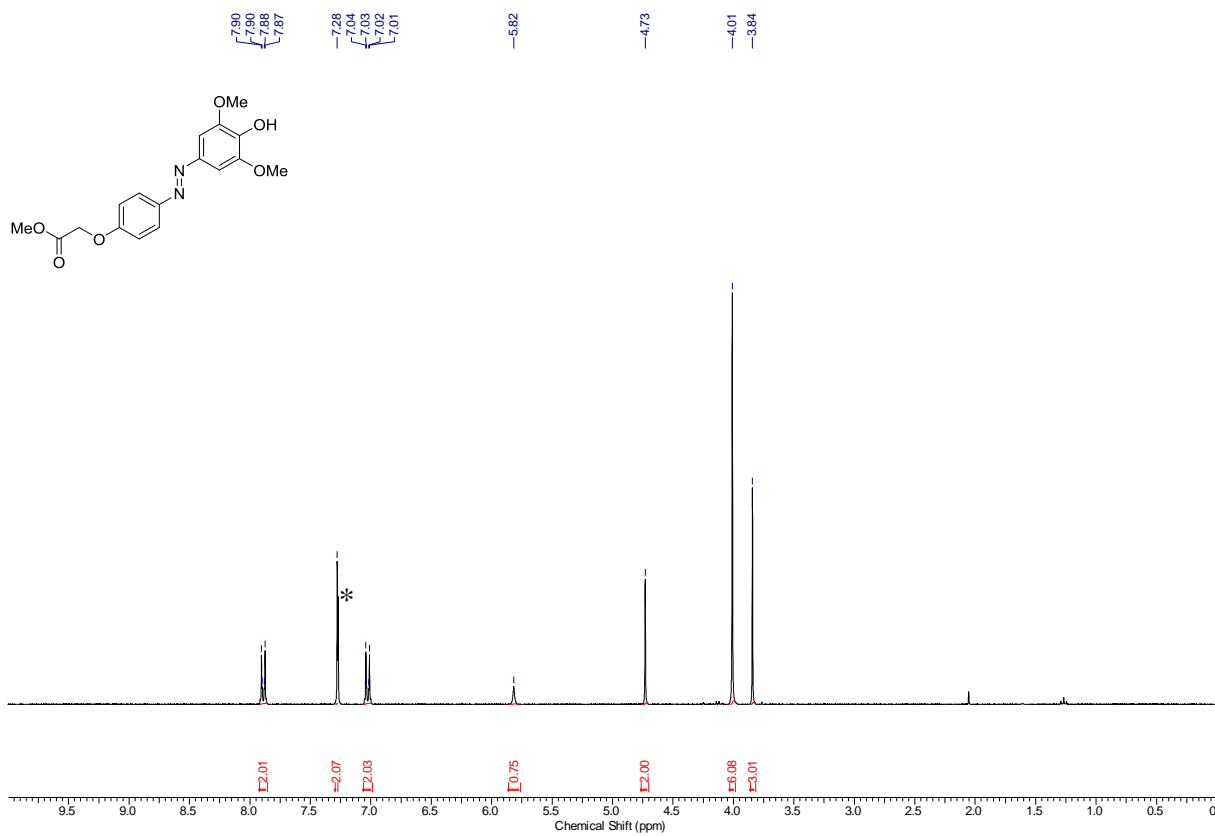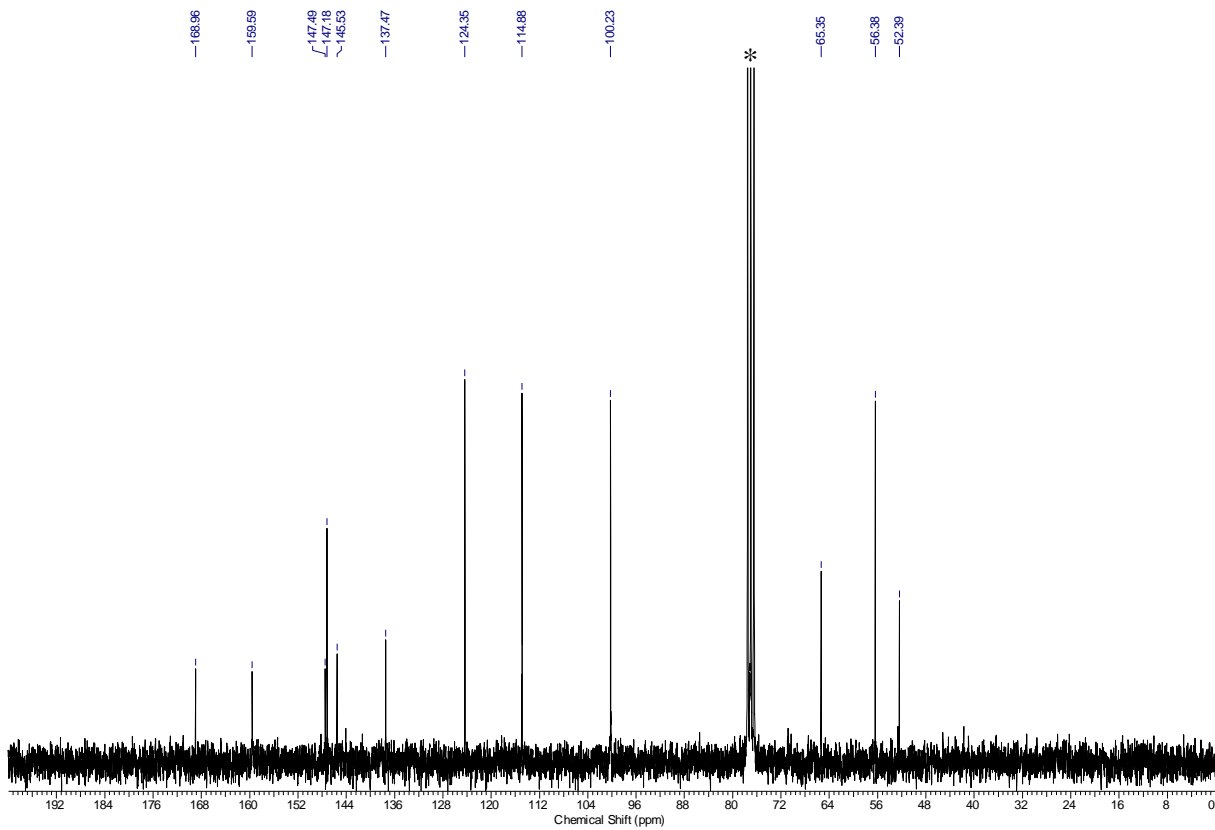

<sup>1</sup>H-NMR (300 MHz, CDCl<sub>3</sub>) and <sup>13</sup>C-NMR (63 MHz, CDCl<sub>3</sub>) spectrum of compound **25b**. \* = NMR-solvent

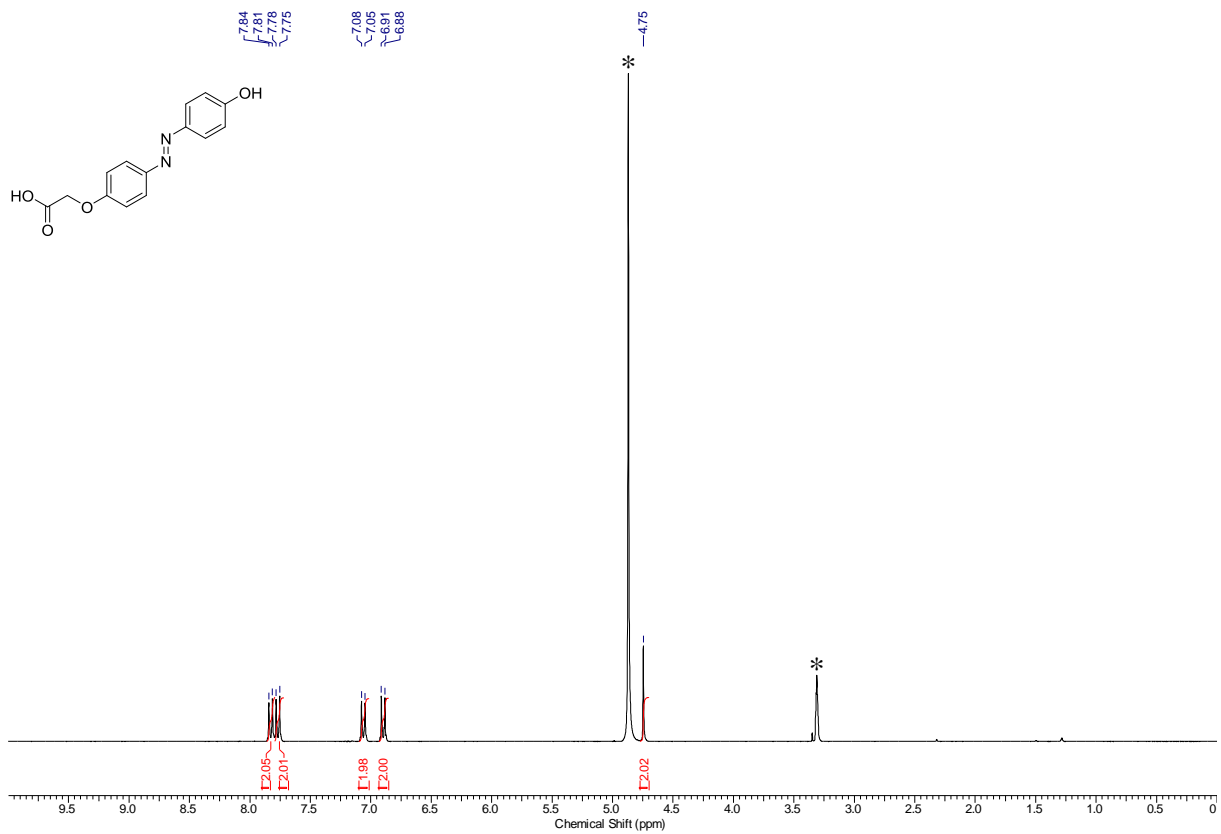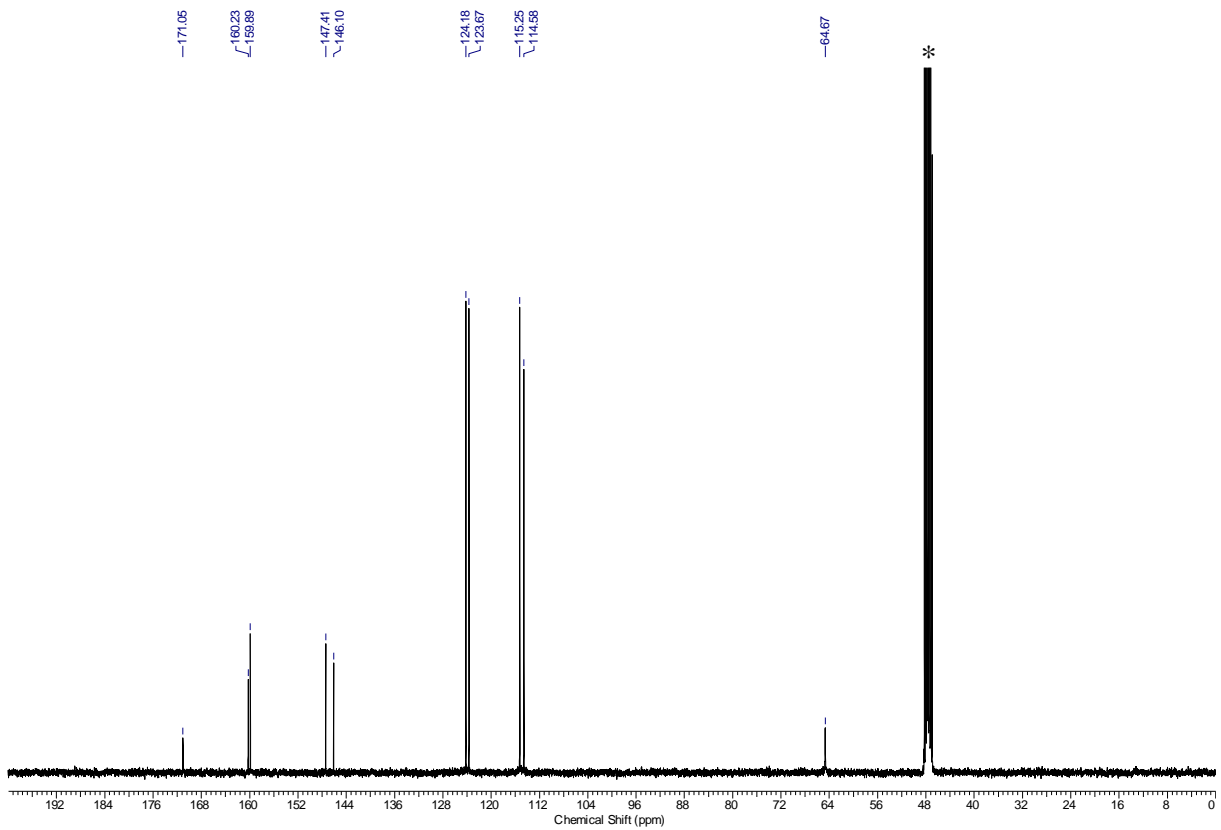

<sup>1</sup>H-NMR (300 MHz, CD<sub>3</sub>OD) and <sup>13</sup>C-NMR (101 MHz, CD<sub>3</sub>OD) spectrum of compound **25f**. \* = NMR-solvent, H<sub>2</sub>O

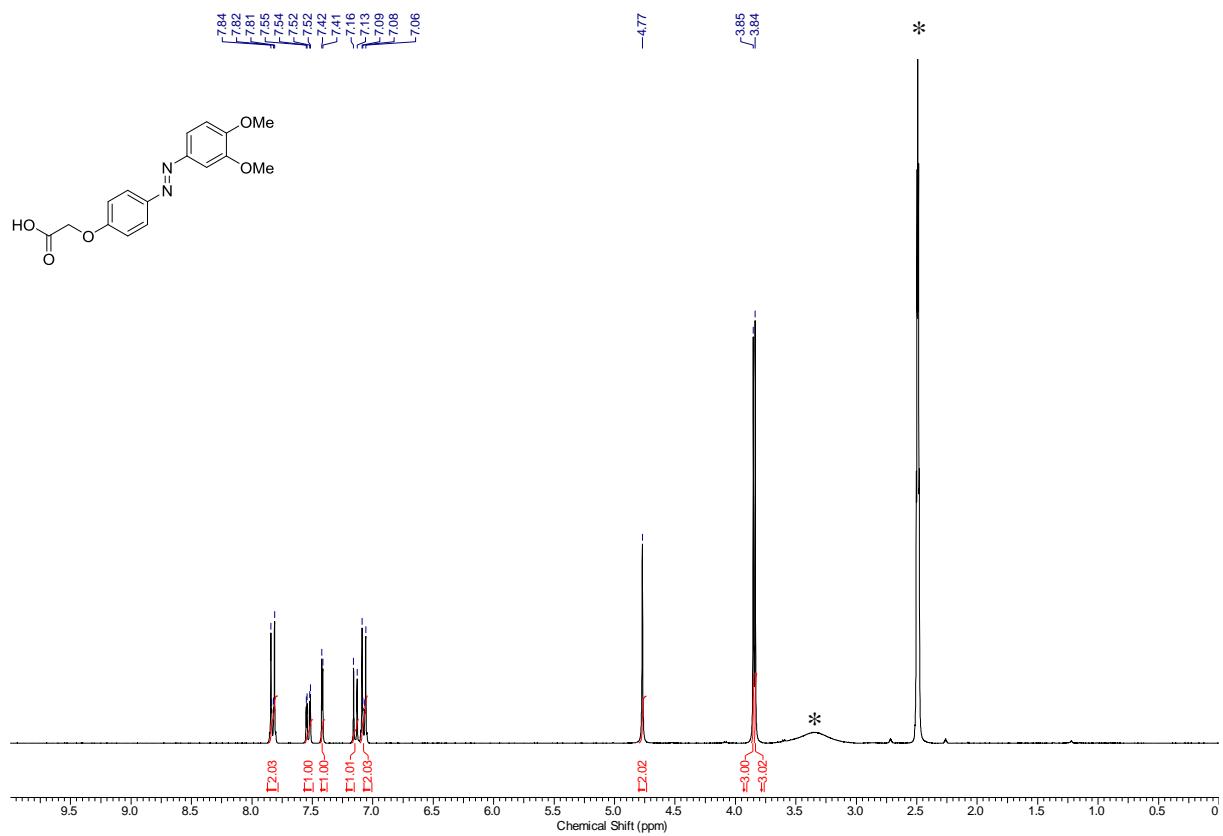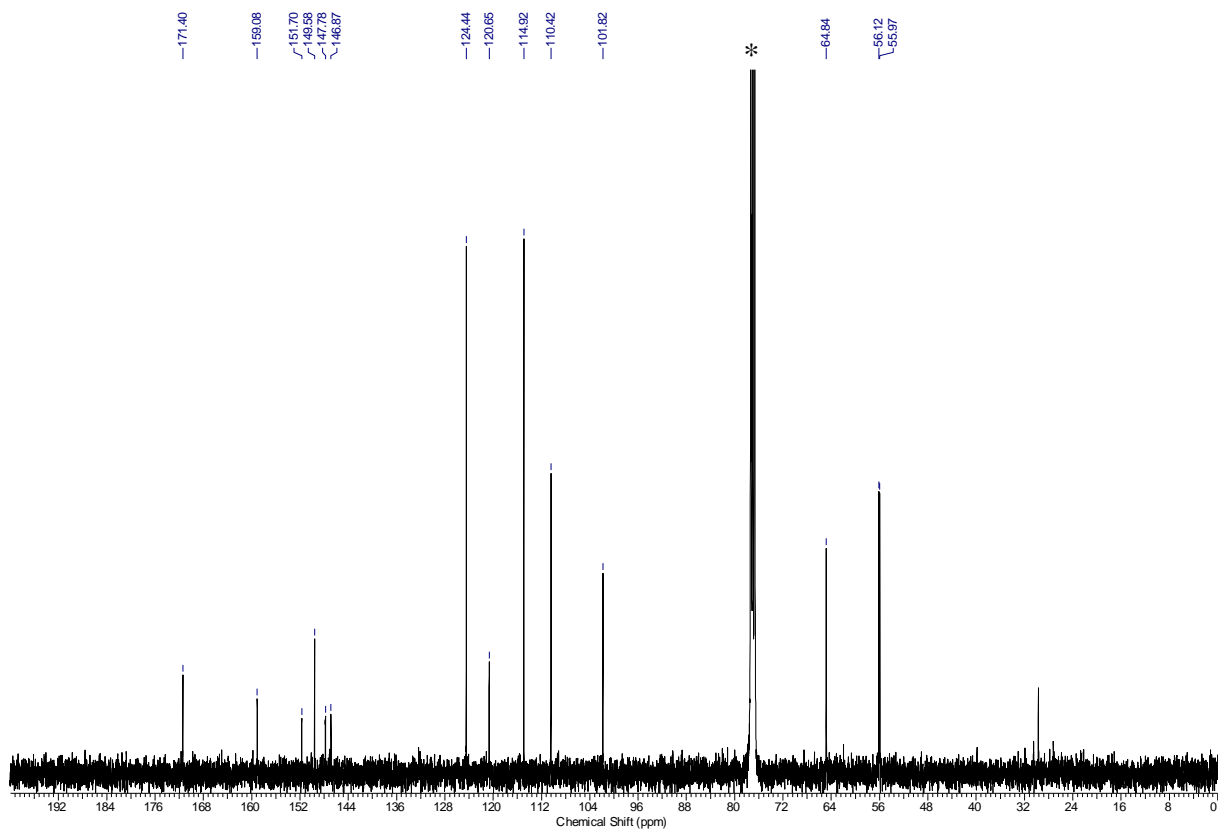

<sup>1</sup>H-NMR (300 MHz, DMSO-*d*<sub>6</sub>) and <sup>13</sup>C-NMR (101 MHz, CDCl<sub>3</sub>) spectrum of compound **26a**. \* = NMR-solvent, H<sub>2</sub>O

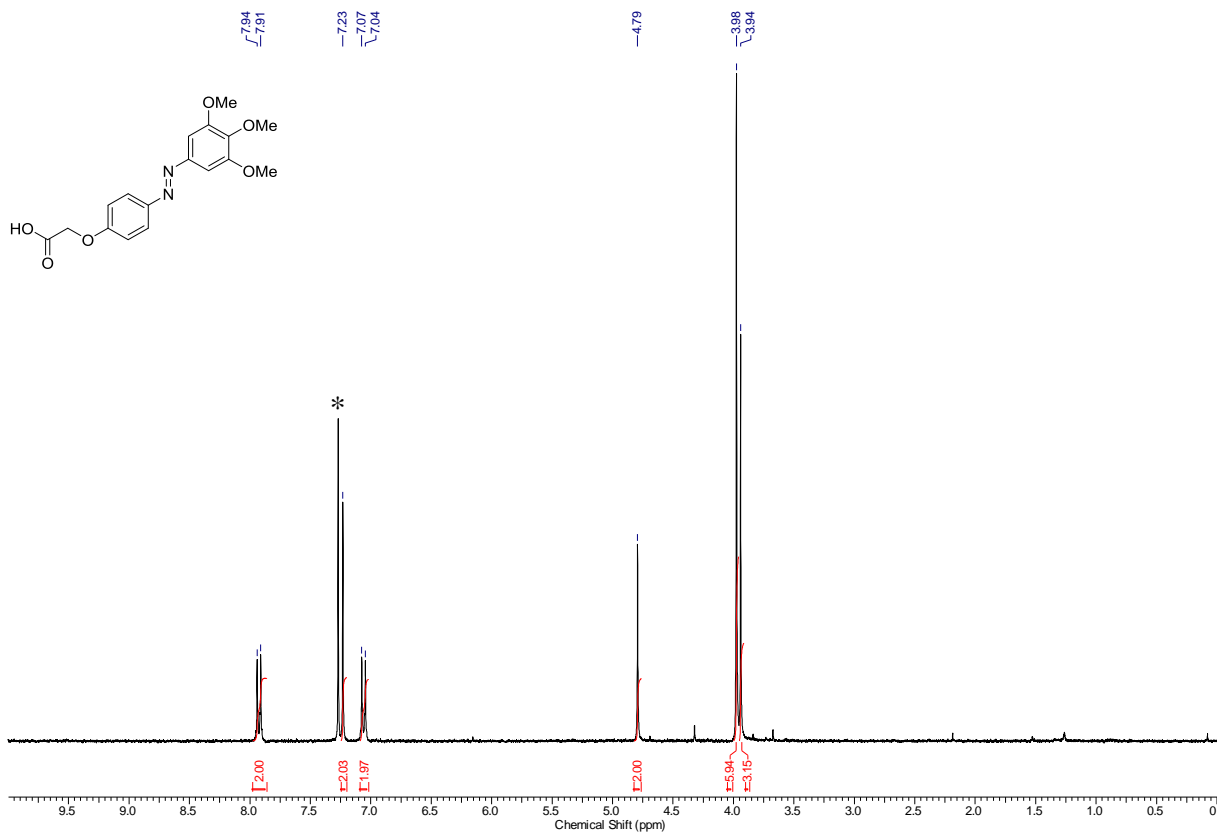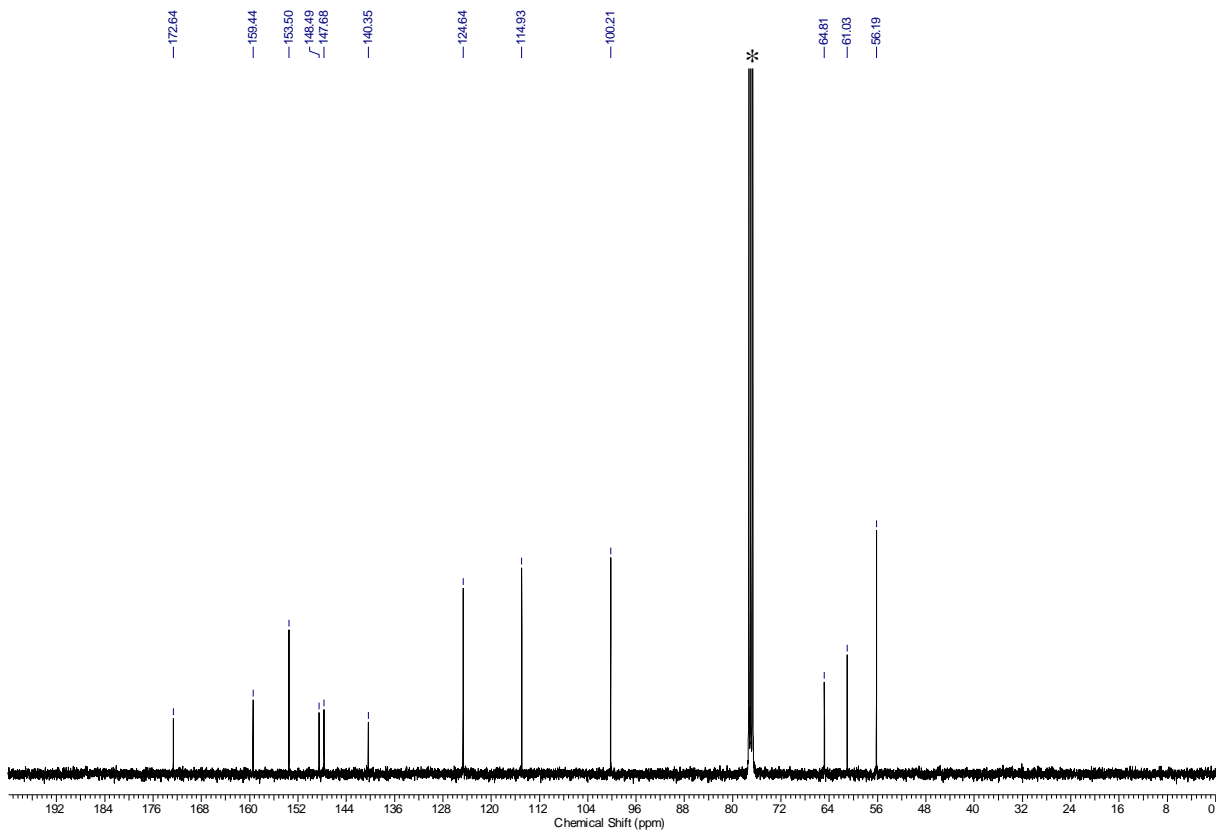

<sup>1</sup>H-NMR (300 MHz, CDCl<sub>3</sub>) and <sup>13</sup>C-NMR (101 MHz, CDCl<sub>3</sub>) spectrum of compound **26b**. \* = NMR-solvent

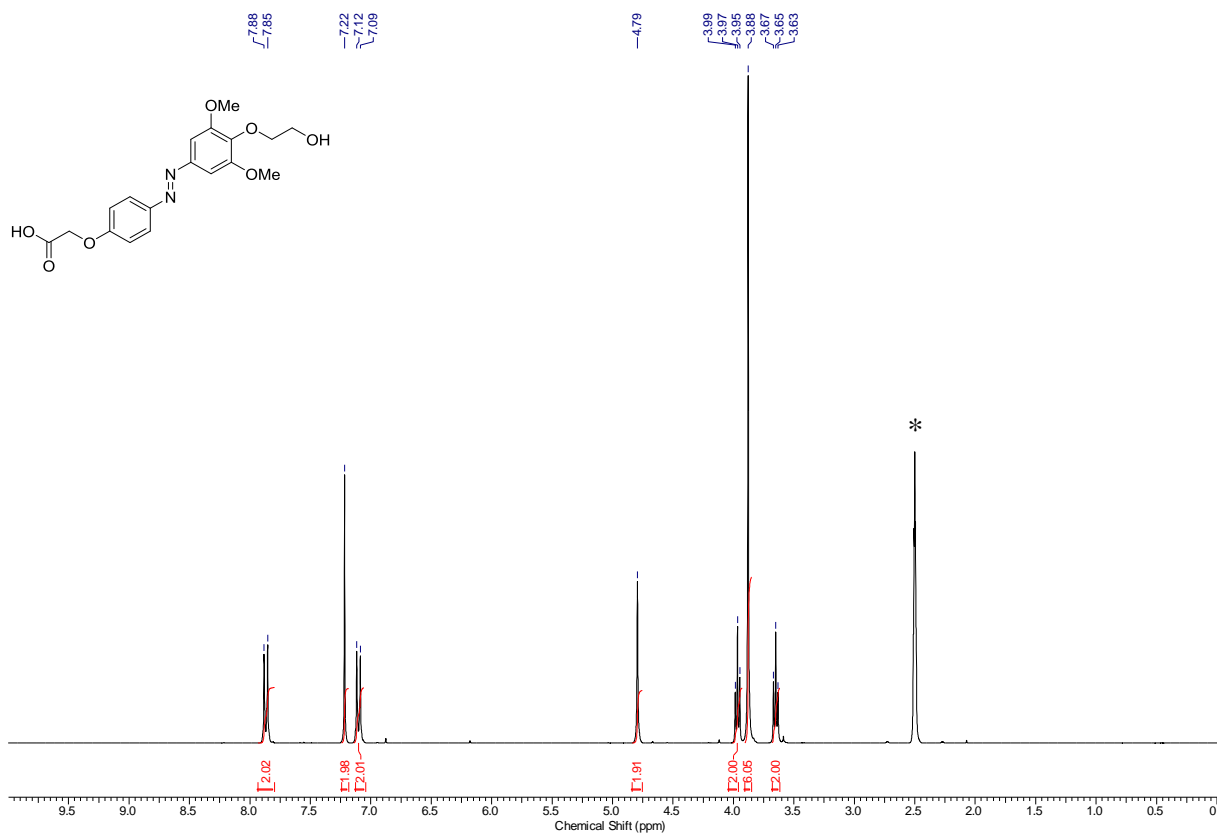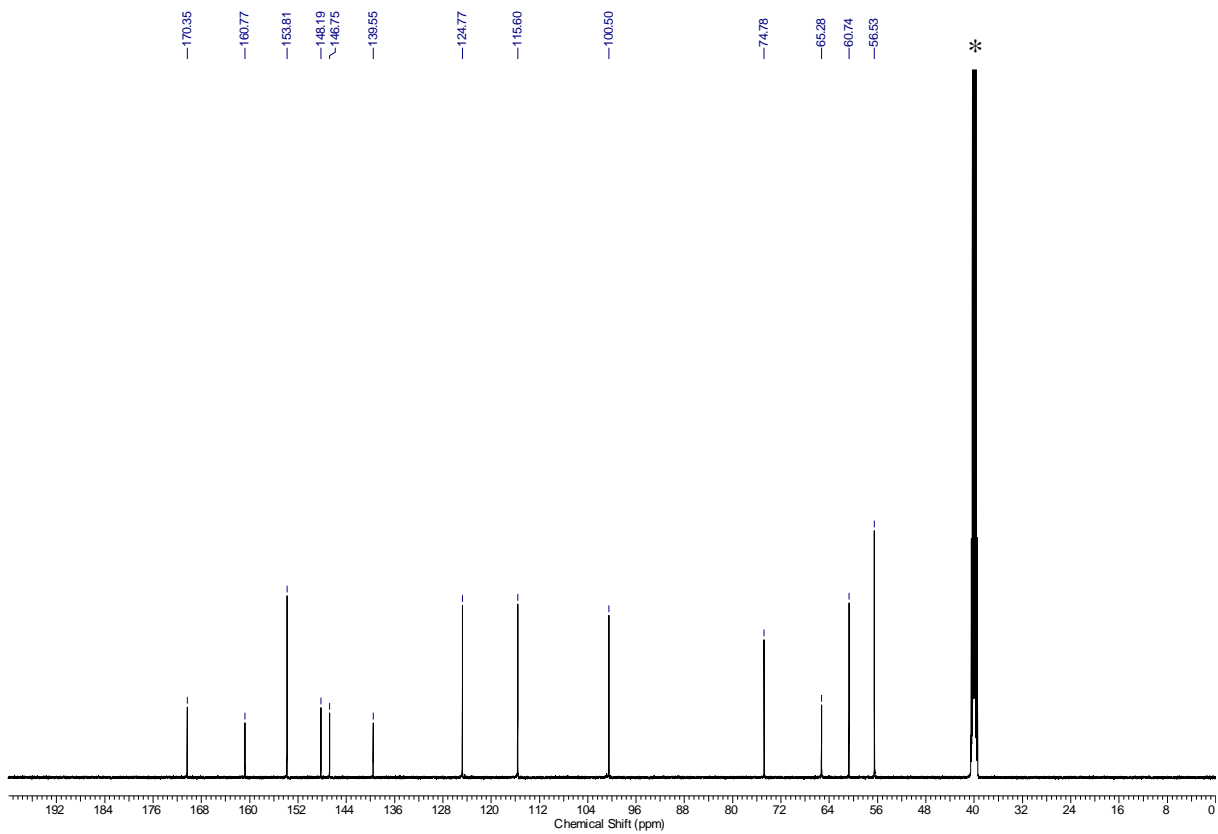

<sup>1</sup>H-NMR (300 MHz, DMSO-d<sub>6</sub>) and <sup>13</sup>C-NMR (126 MHz, DMSO-d<sub>6</sub>) spectrum of compound **26c**. \* = NMR-Solvent

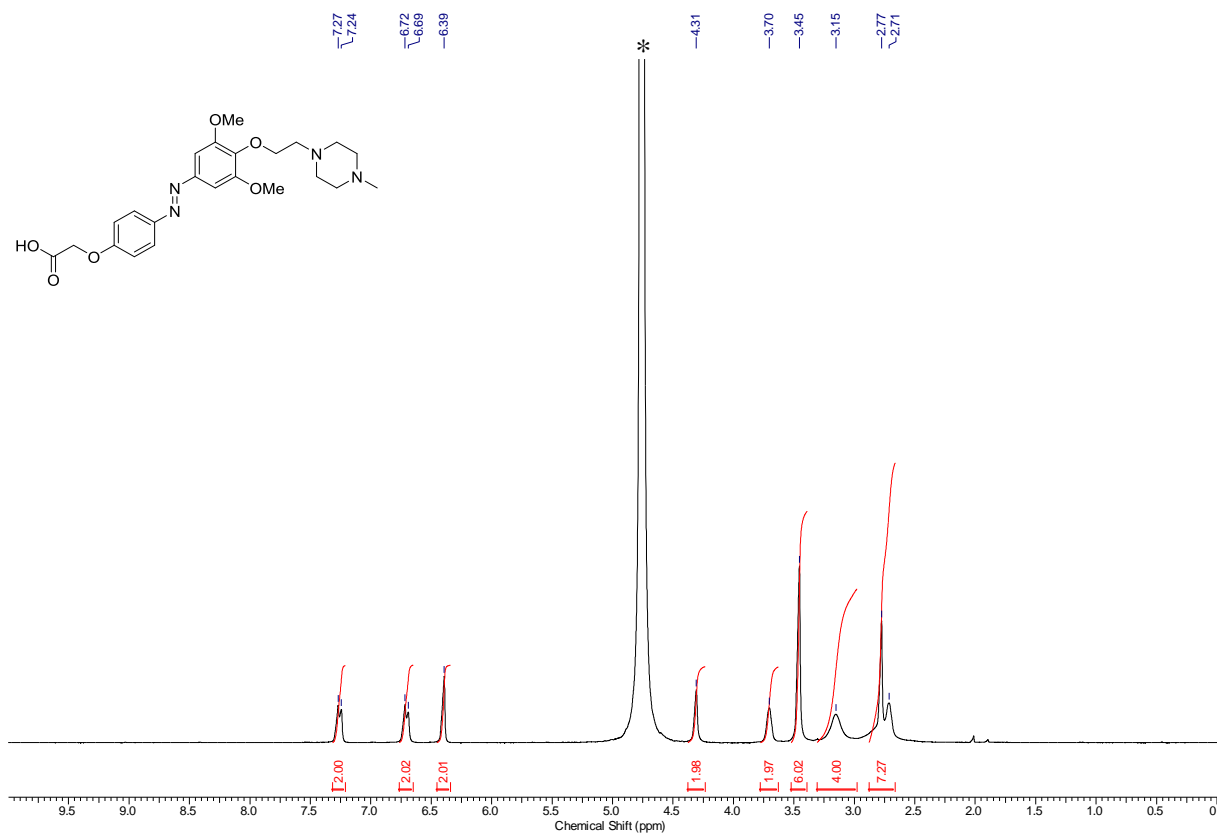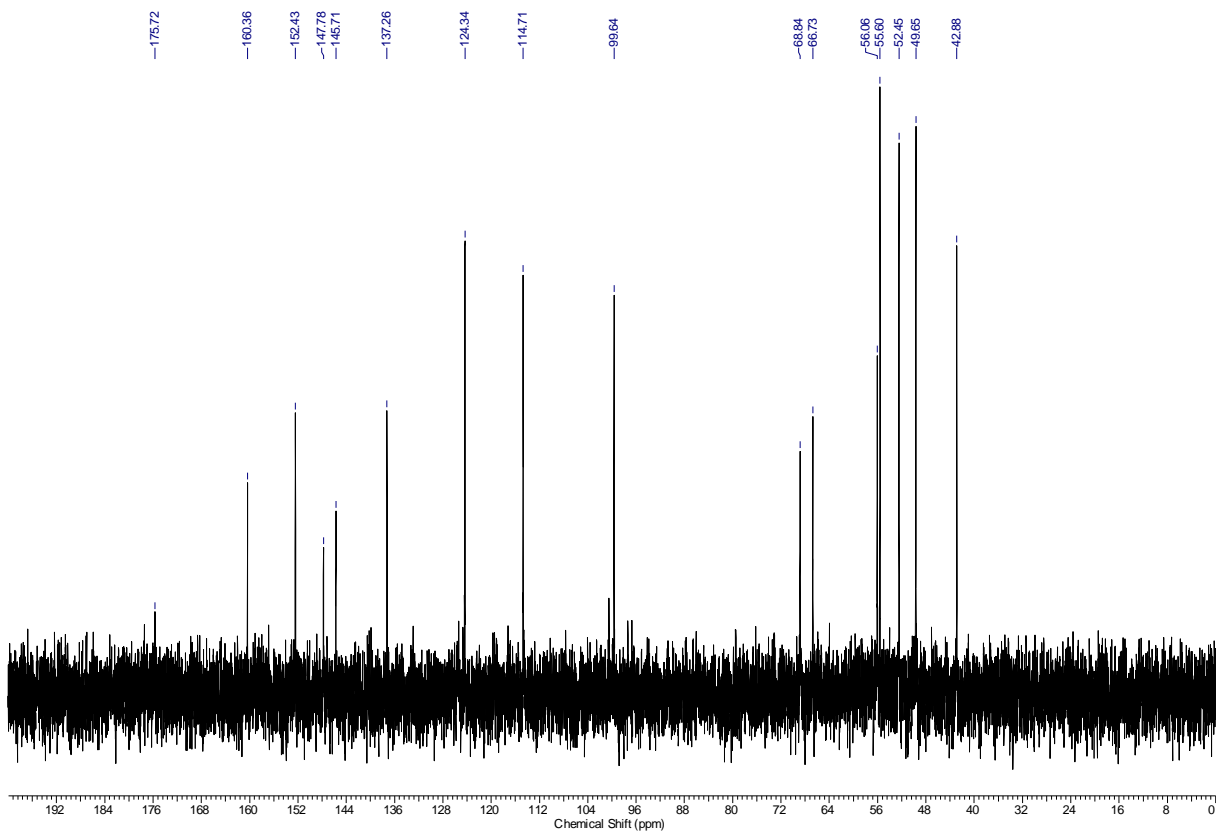

<sup>1</sup>H-NMR (300 MHz, D<sub>2</sub>O) and <sup>13</sup>C-NMR (101 MHz, D<sub>2</sub>O) spectrum of compound **26e**. \* = NMR-Solvent

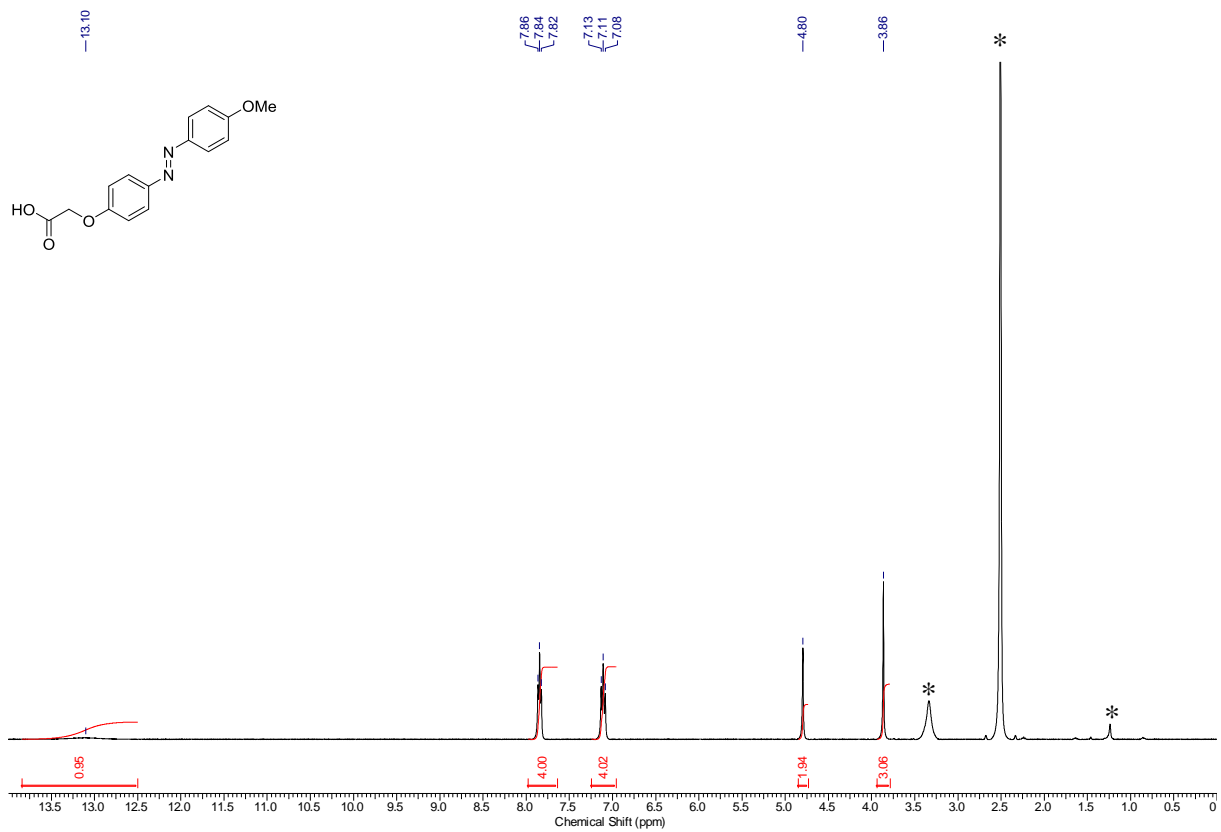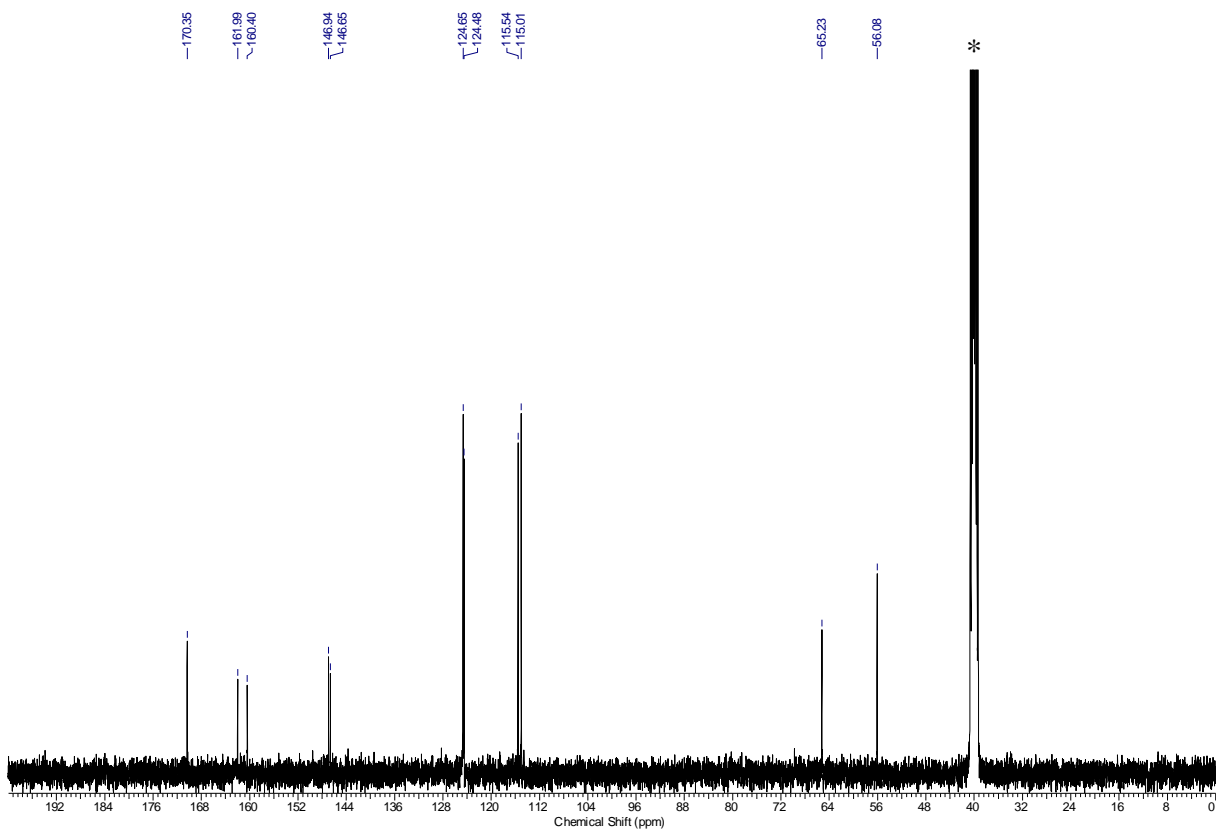

<sup>1</sup>H-NMR (400 MHz, DMSO-*d*<sub>6</sub>) and <sup>13</sup>C-NMR (101 MHz, DMSO-*d*<sub>6</sub>) spectrum of compound **26f**. \* = NMR-solvent, H<sub>2</sub>O, grease



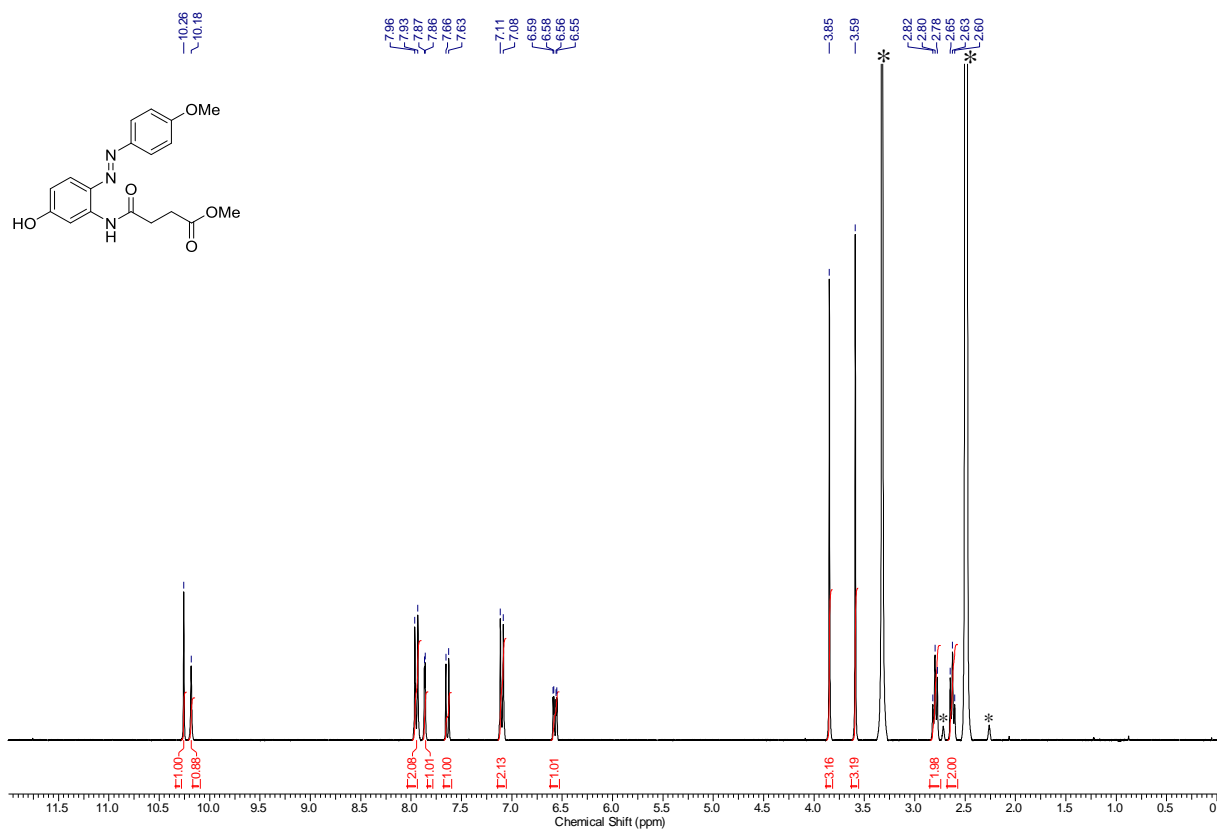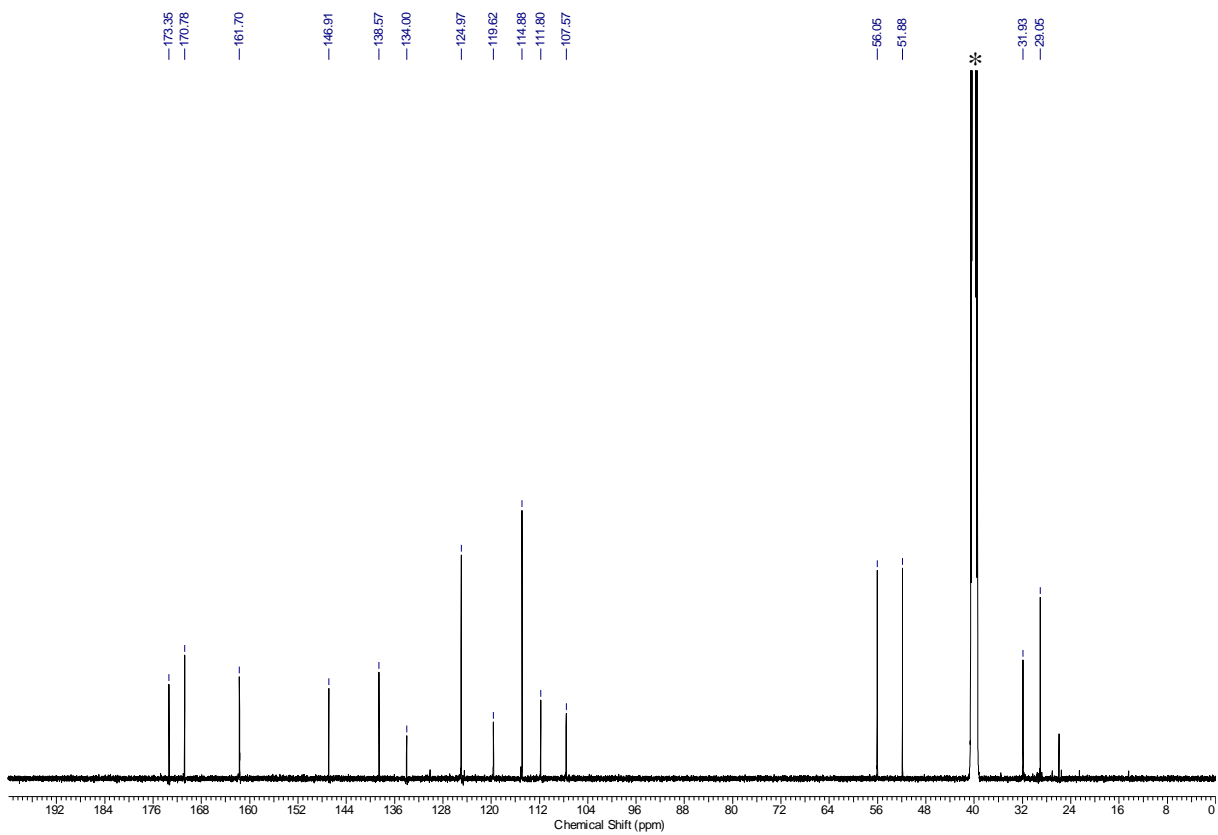

<sup>1</sup>H-NMR (300 MHz, DMSO-*d*<sub>6</sub>) and <sup>13</sup>C-NMR (126 MHz, DMSO-*d*<sub>6</sub>) spectrum of compound **28a**. \* = NMR-solvent, H<sub>2</sub>O

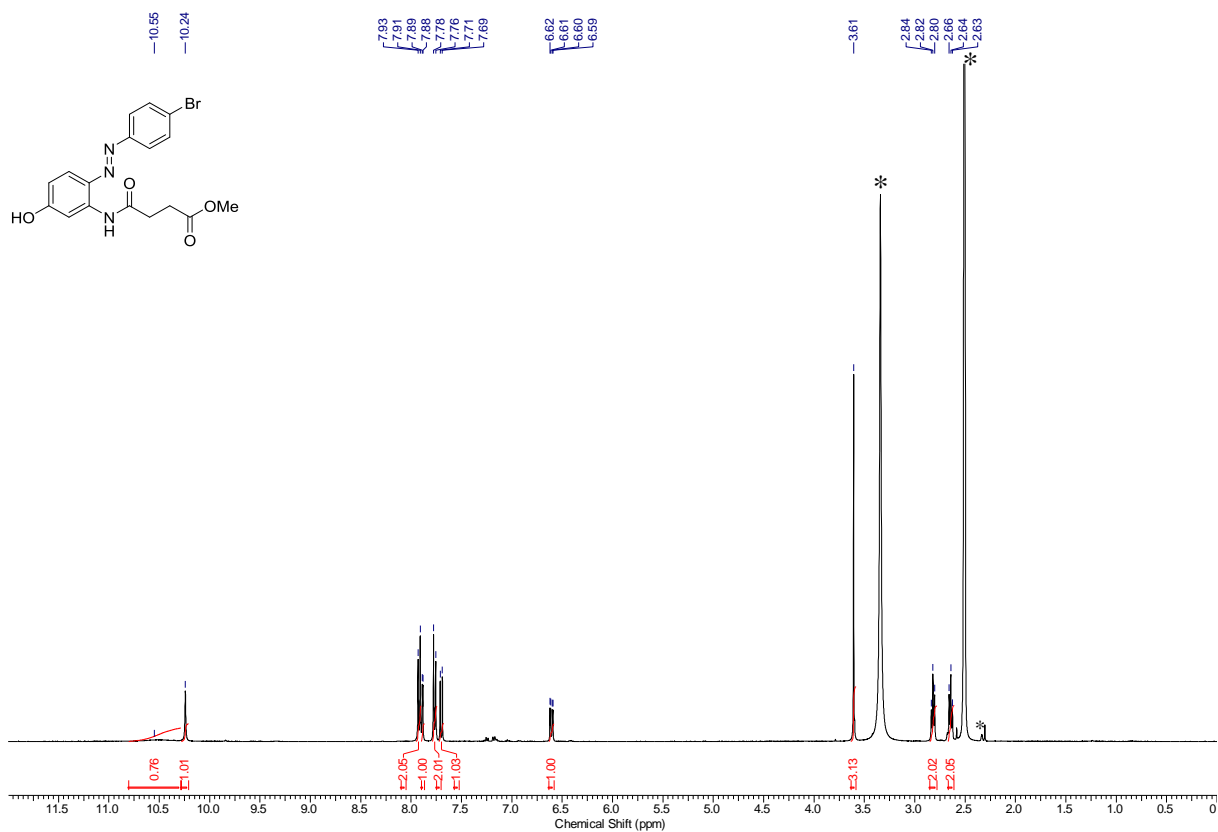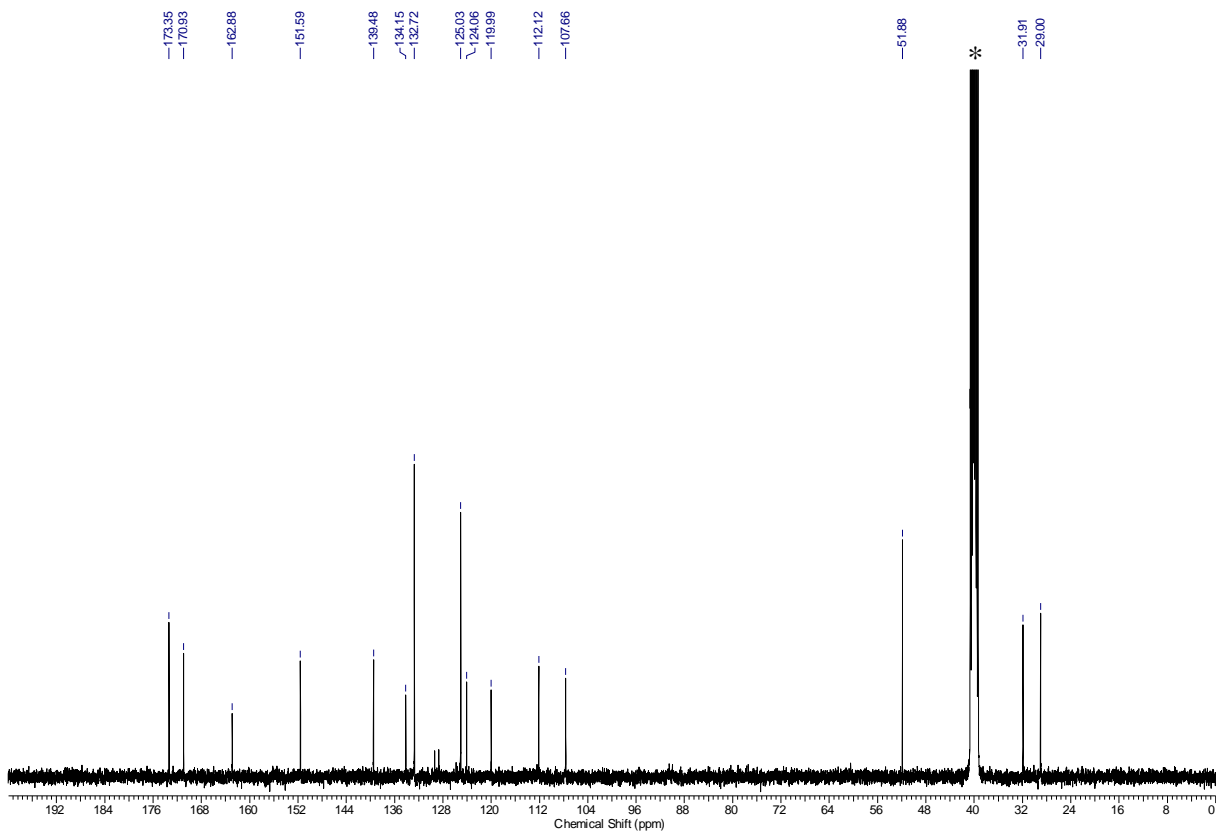

<sup>1</sup>H-NMR (400 MHz, DMSO-*d*<sub>6</sub>) and <sup>13</sup>C-NMR (101 MHz, DMSO-*d*<sub>6</sub>) spectrum of compound **28e**. \* = NMR-solvent, H<sub>2</sub>O

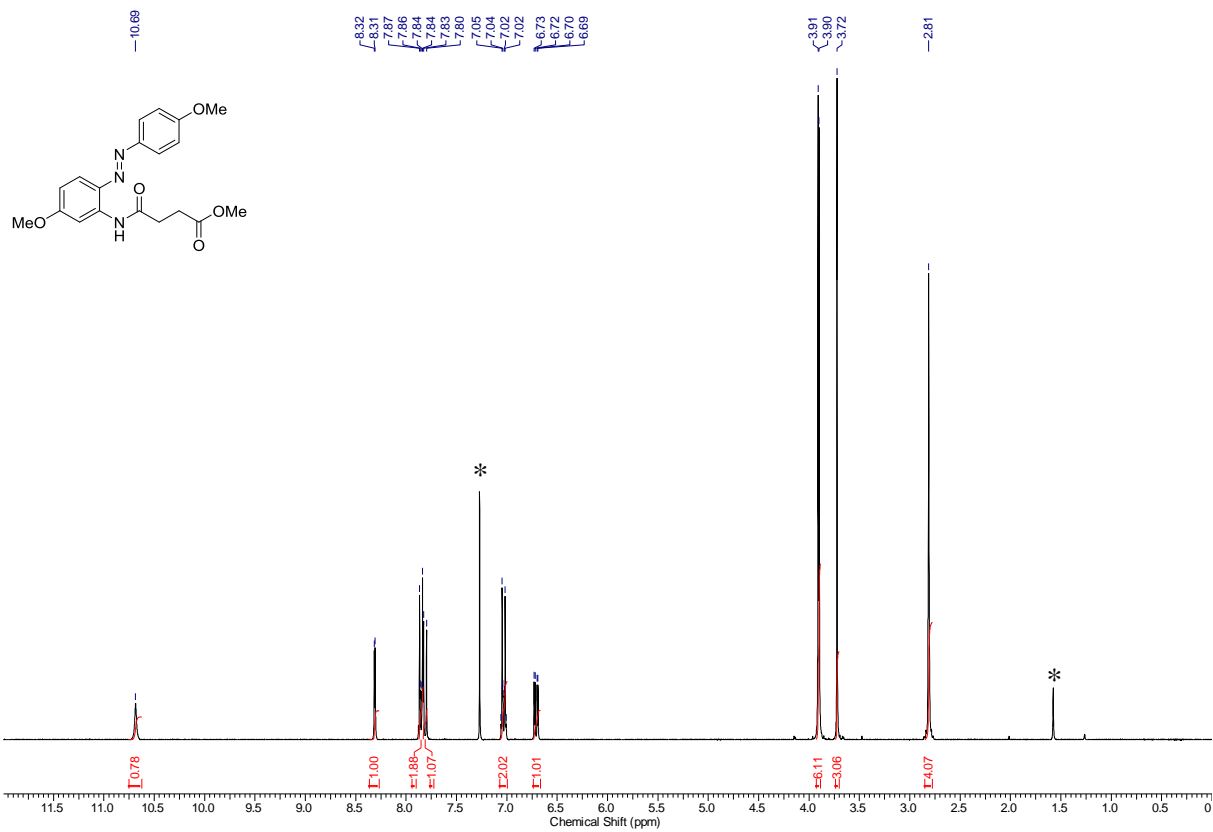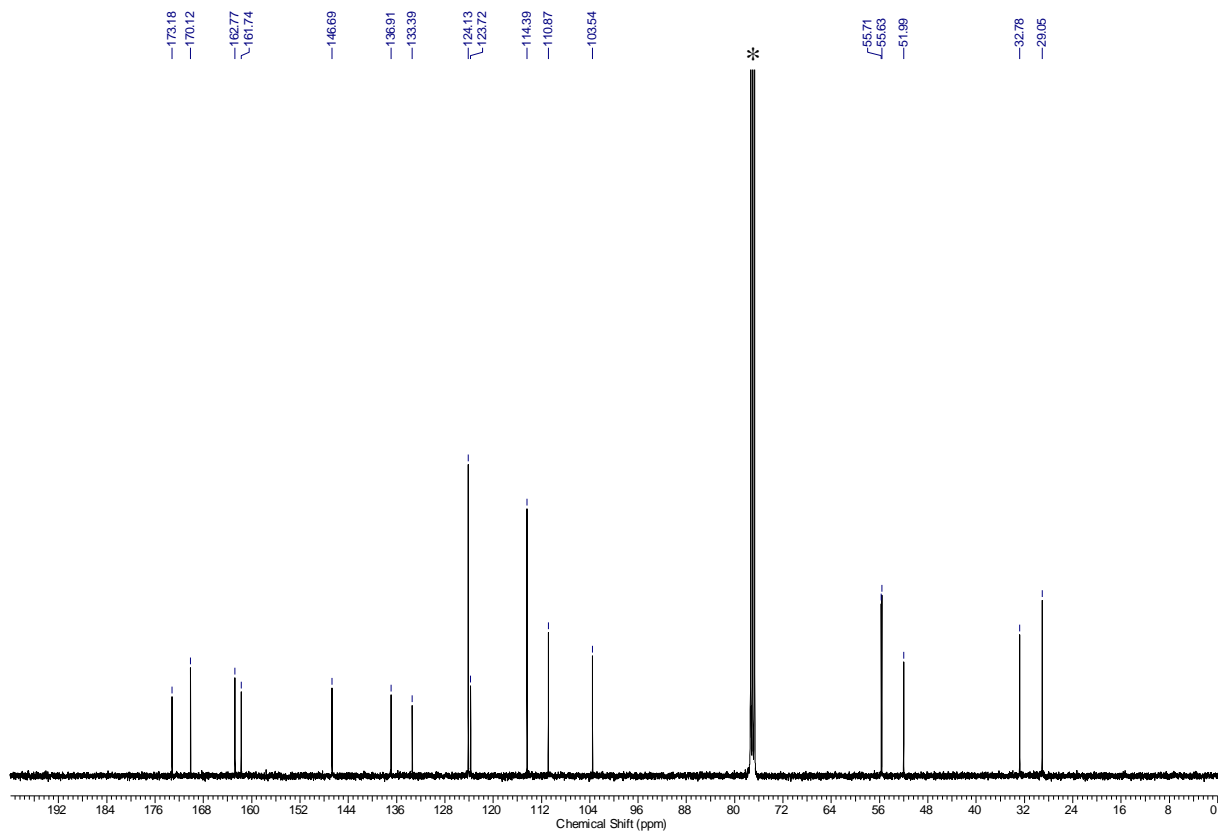

<sup>1</sup>H-NMR (300 MHz, CDCl<sub>3</sub>) and <sup>13</sup>C-NMR (101 MHz, CDCl<sub>3</sub>) spectrum of compound **29a**. \* = NMR-solvent, H<sub>2</sub>O

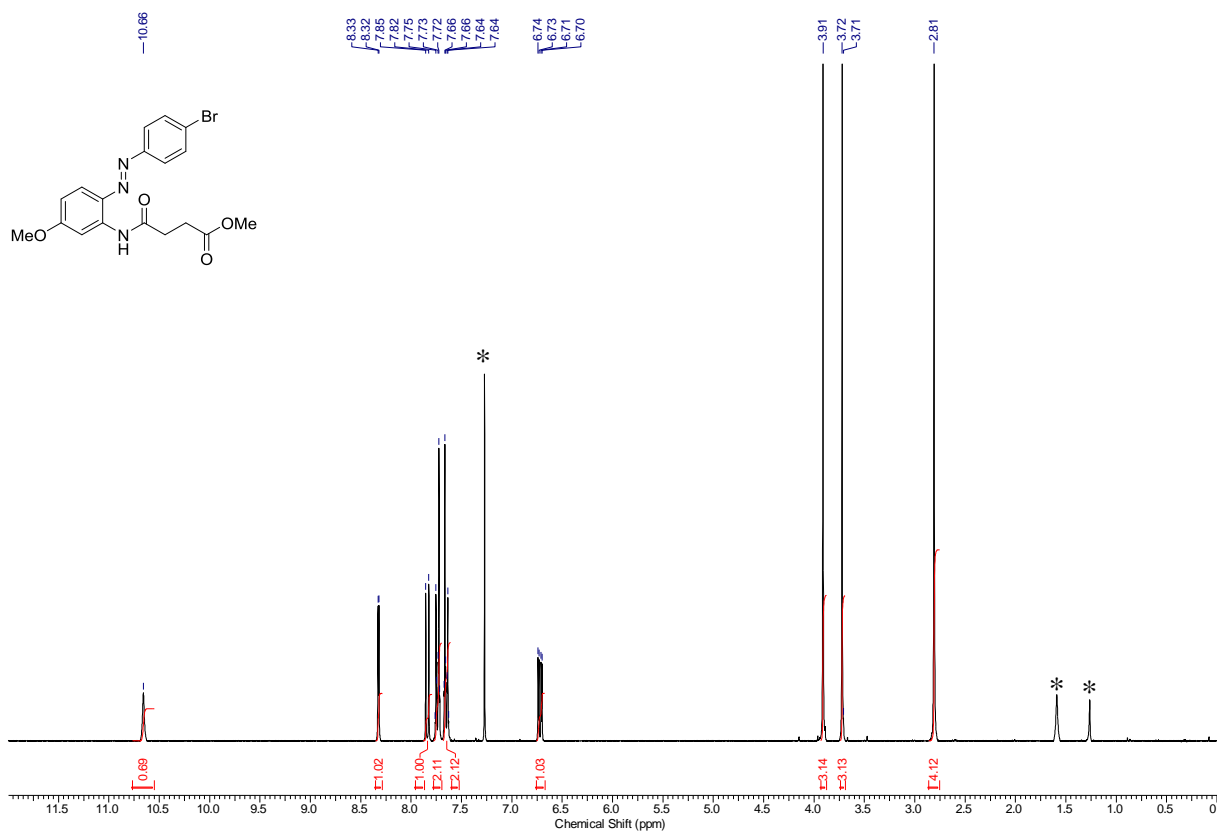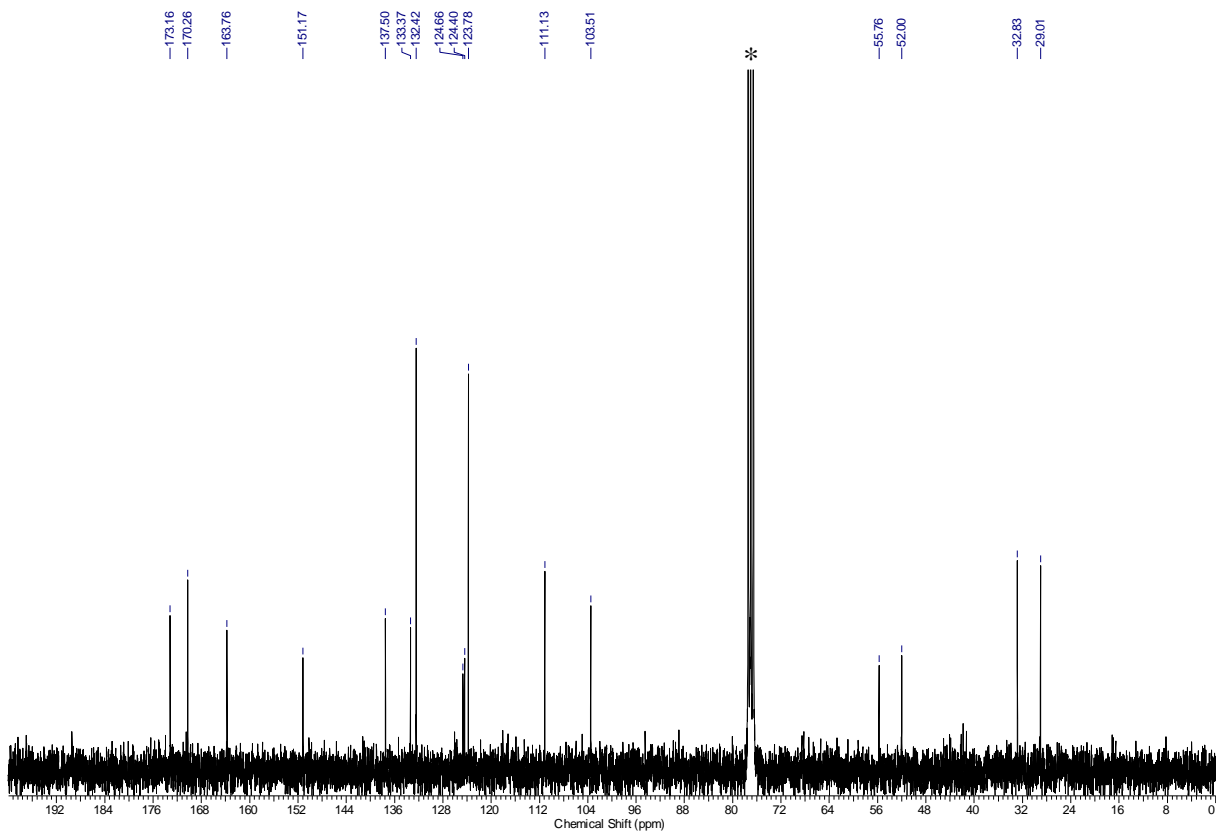

<sup>1</sup>H-NMR (300 MHz, CDCl<sub>3</sub>) and <sup>13</sup>C-NMR (75 MHz, CDCl<sub>3</sub>) spectrum of compound **29e**. \* = NMR-solvent, H<sub>2</sub>O, grease

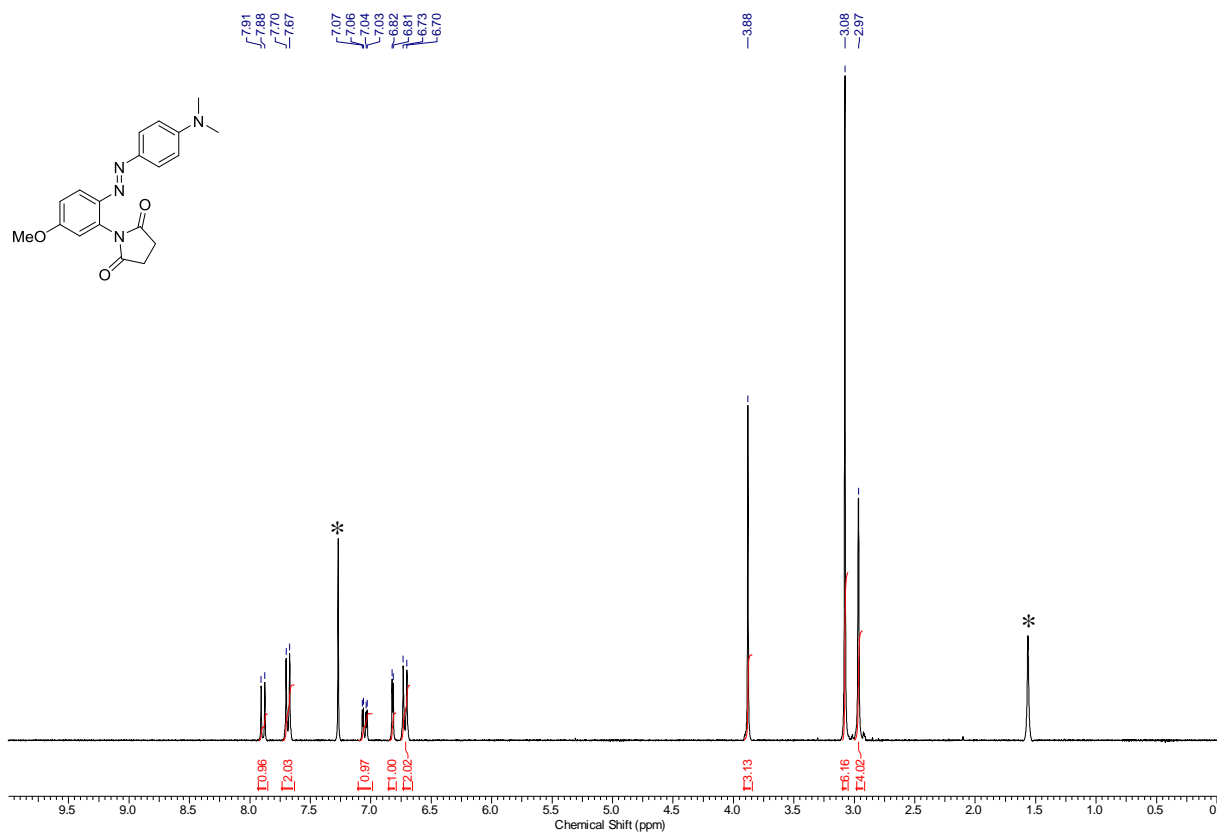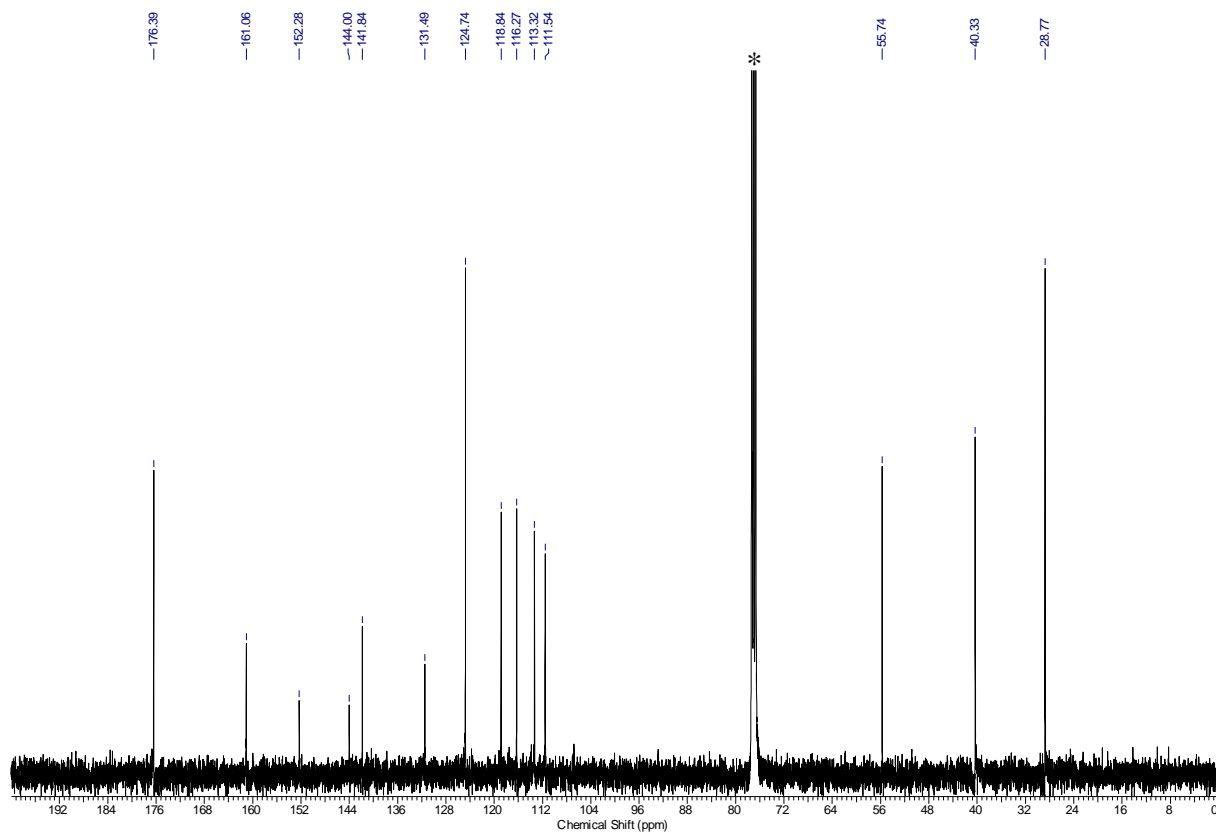

<sup>1</sup>H-NMR (300 MHz, CDCl<sub>3</sub>) and <sup>13</sup>C-NMR (101 MHz, CDCl<sub>3</sub>) spectrum of compound **30b**. \* = NMR-solvent, H<sub>2</sub>O

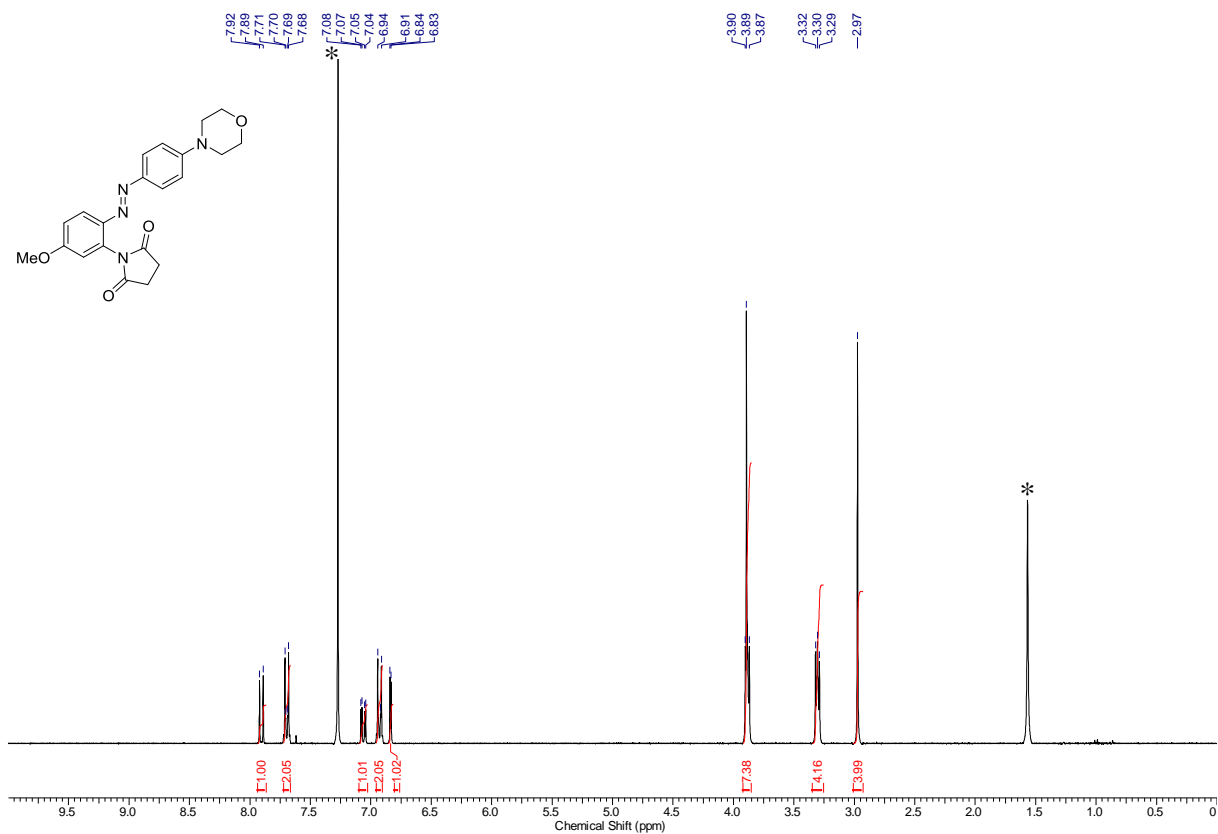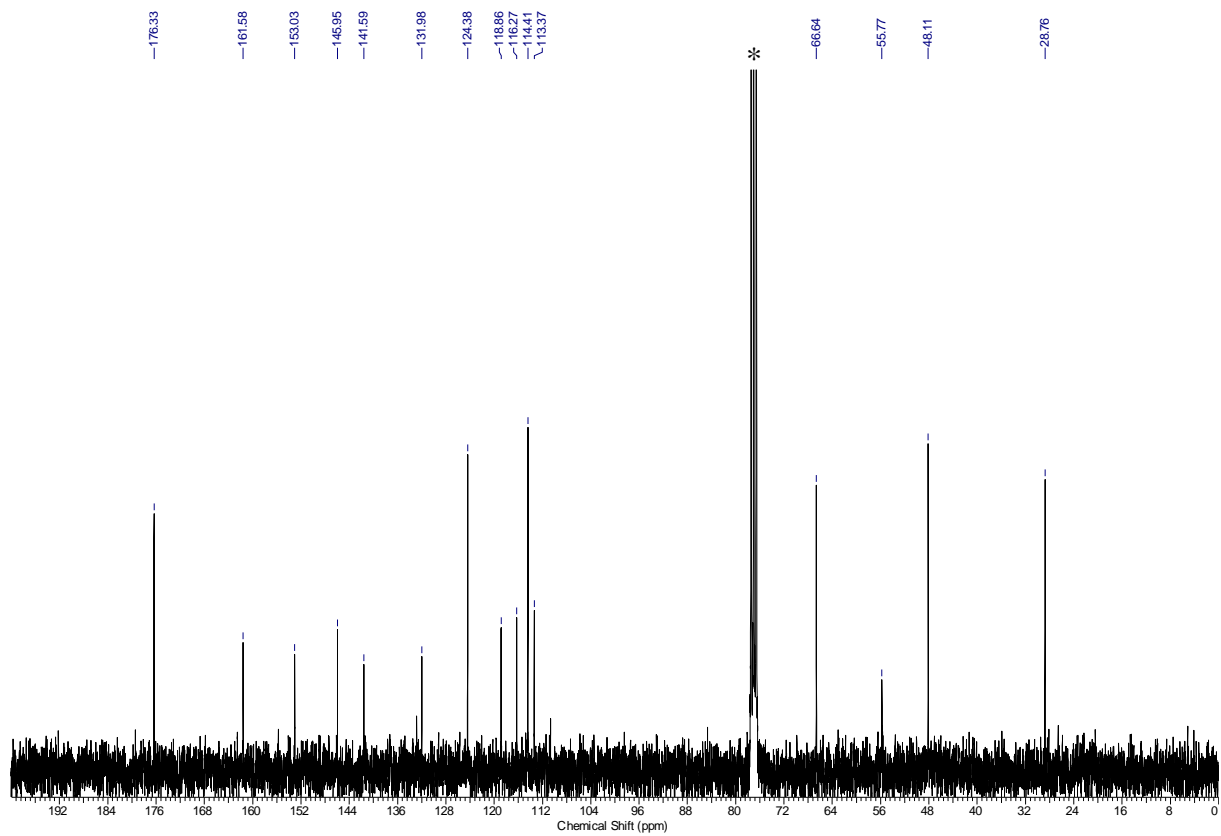

$^1\text{H-NMR}$  (300 MHz,  $\text{CDCl}_3$ ) and  $^{13}\text{C-NMR}$  (75 MHz,  $\text{CDCl}_3$ ) spectrum of compound **30c**. \* = NMR-solvent,  $\text{H}_2\text{O}$

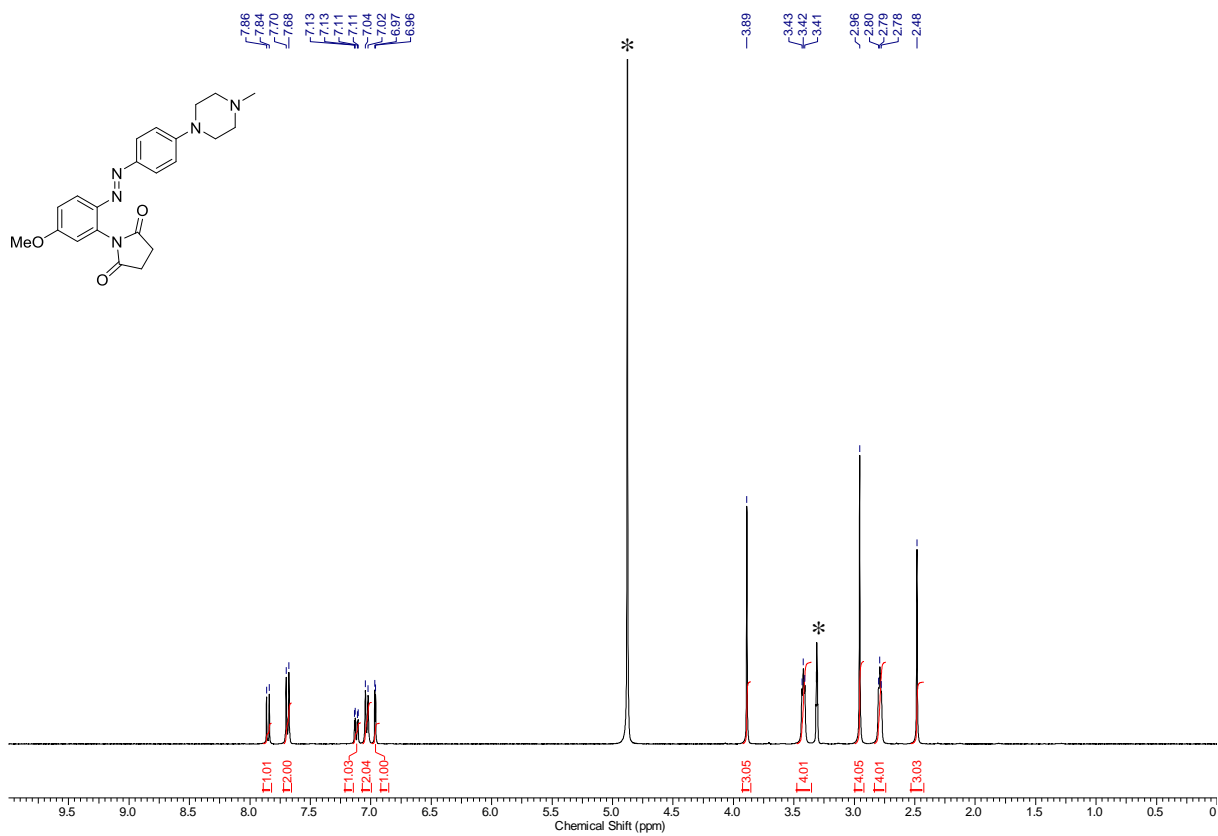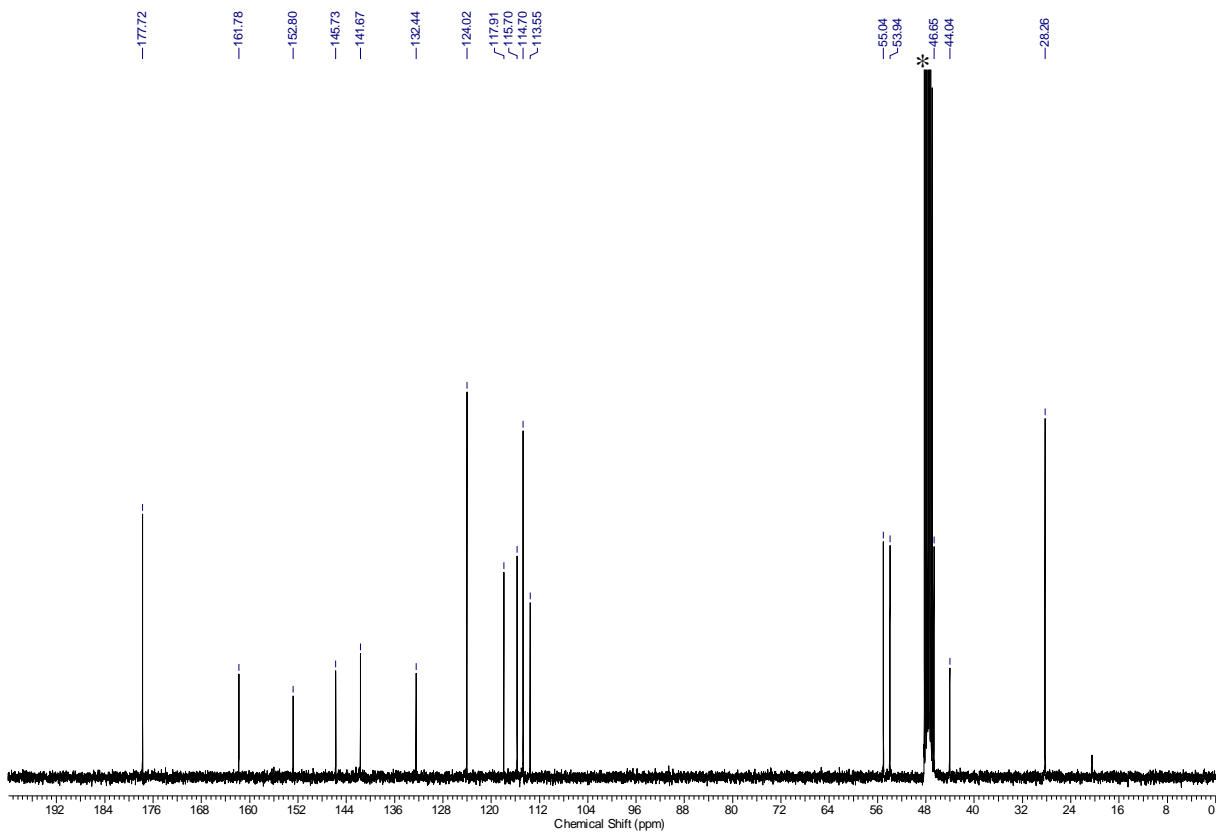

<sup>1</sup>H-NMR (400 MHz, CD<sub>3</sub>OD) and <sup>13</sup>C-NMR (101 MHz, CD<sub>3</sub>OD) spectrum of compound **30d**. \* = NMR-solvent, H<sub>2</sub>O

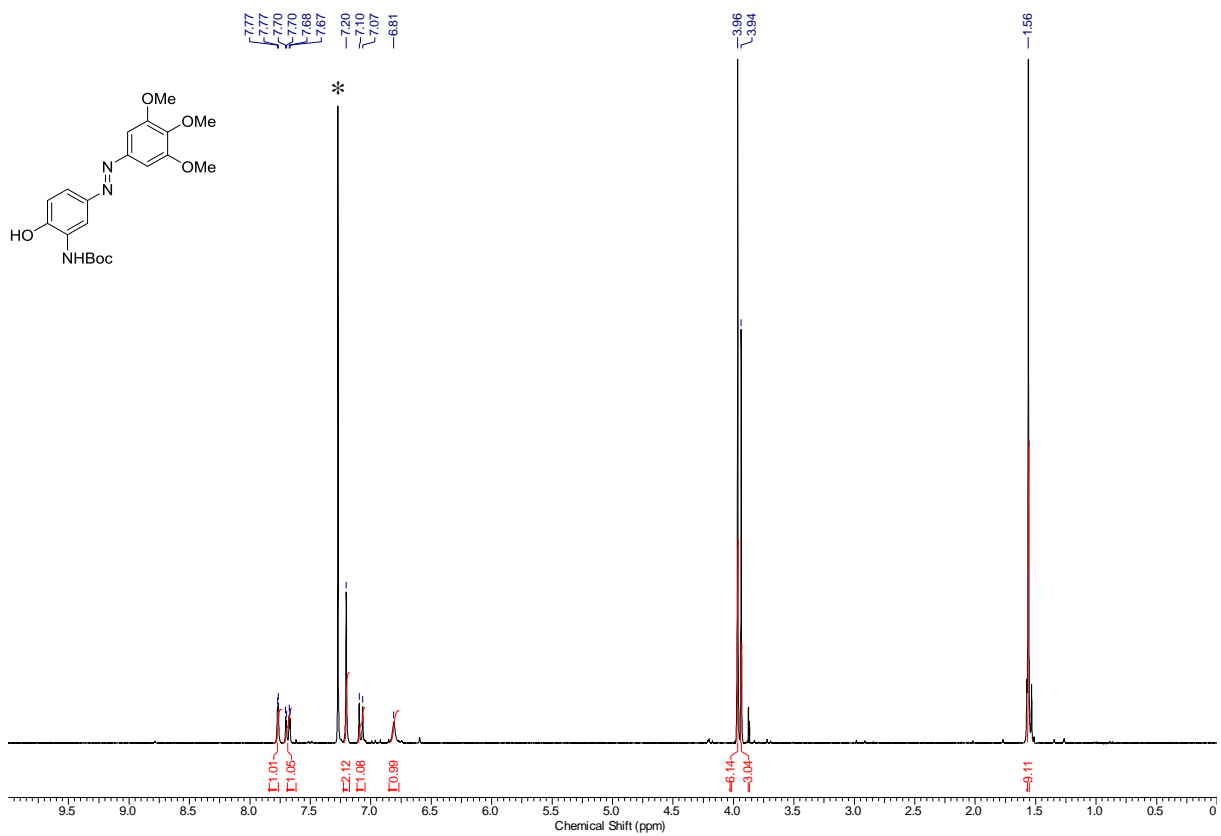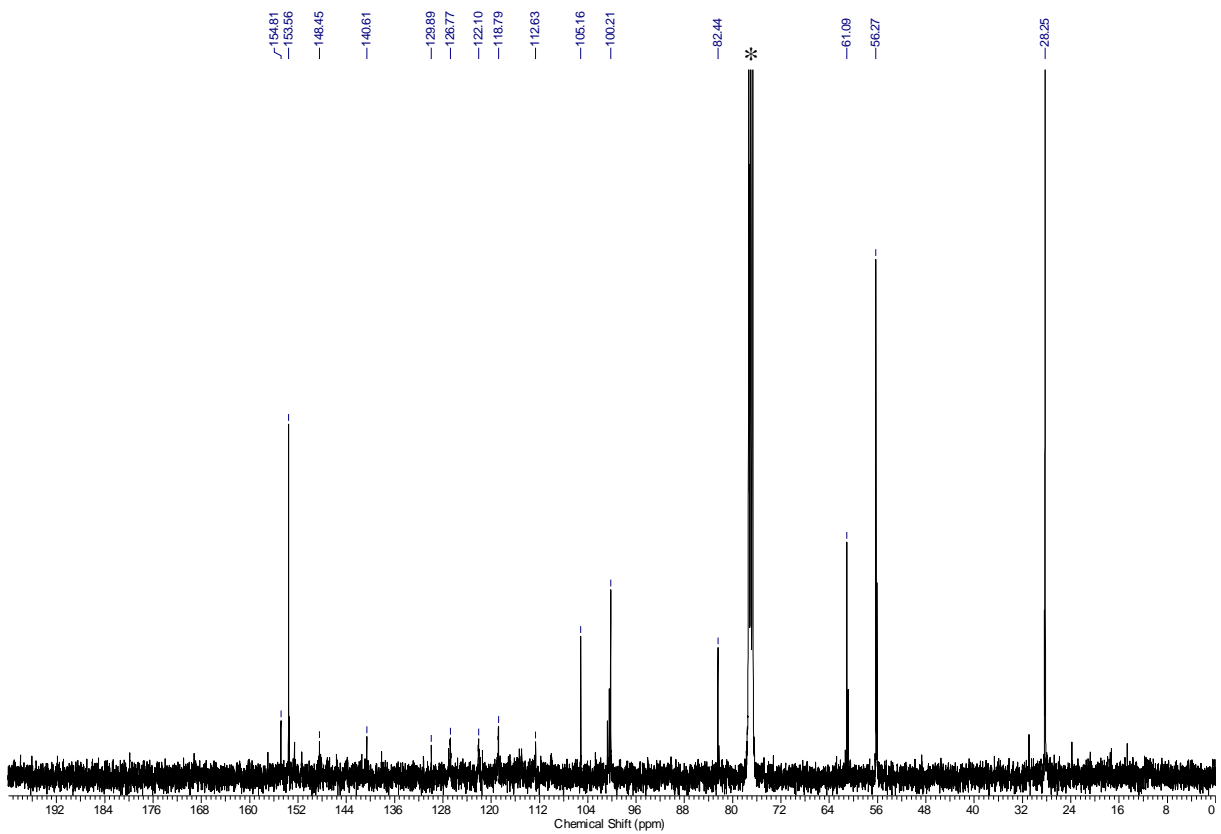

<sup>1</sup>H-NMR (300 MHz, CDCl<sub>3</sub>) and <sup>13</sup>C-NMR (101 MHz, CDCl<sub>3</sub>) spectrum of compound **33**. \* = NMR-solvent



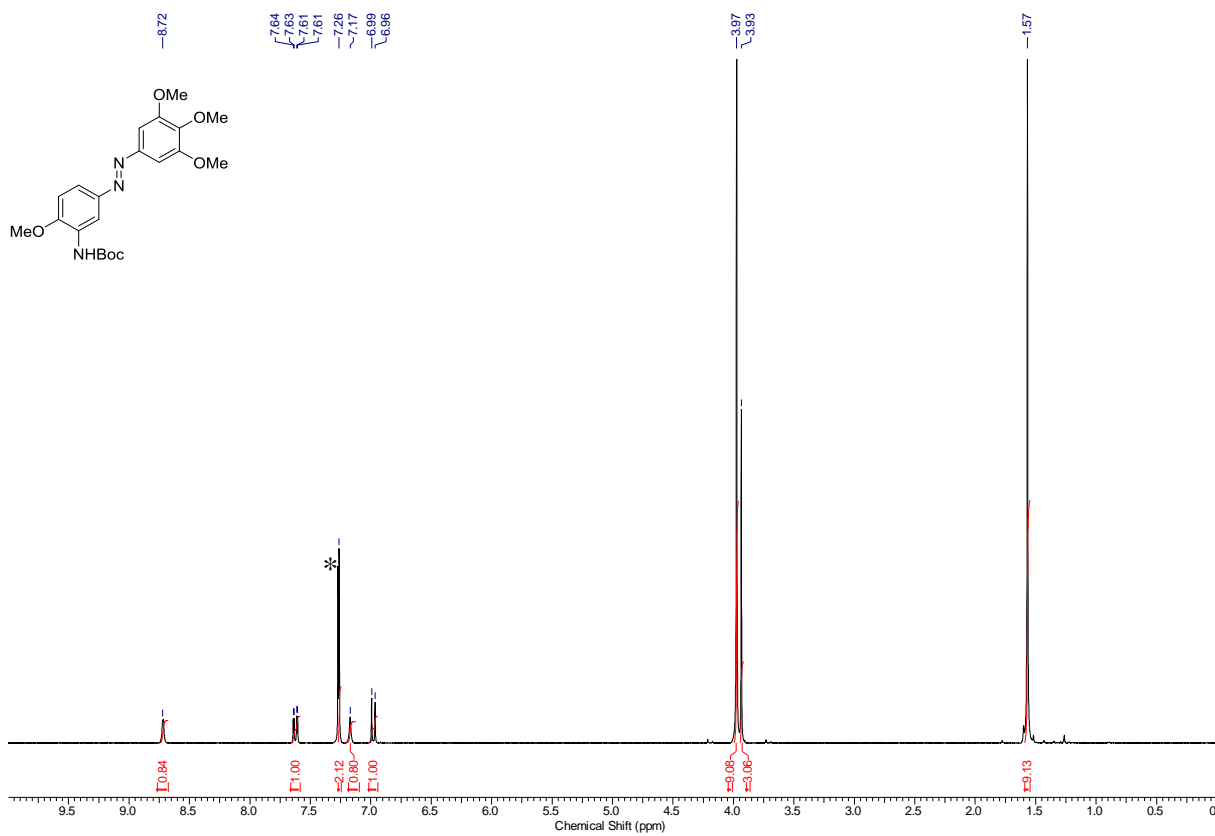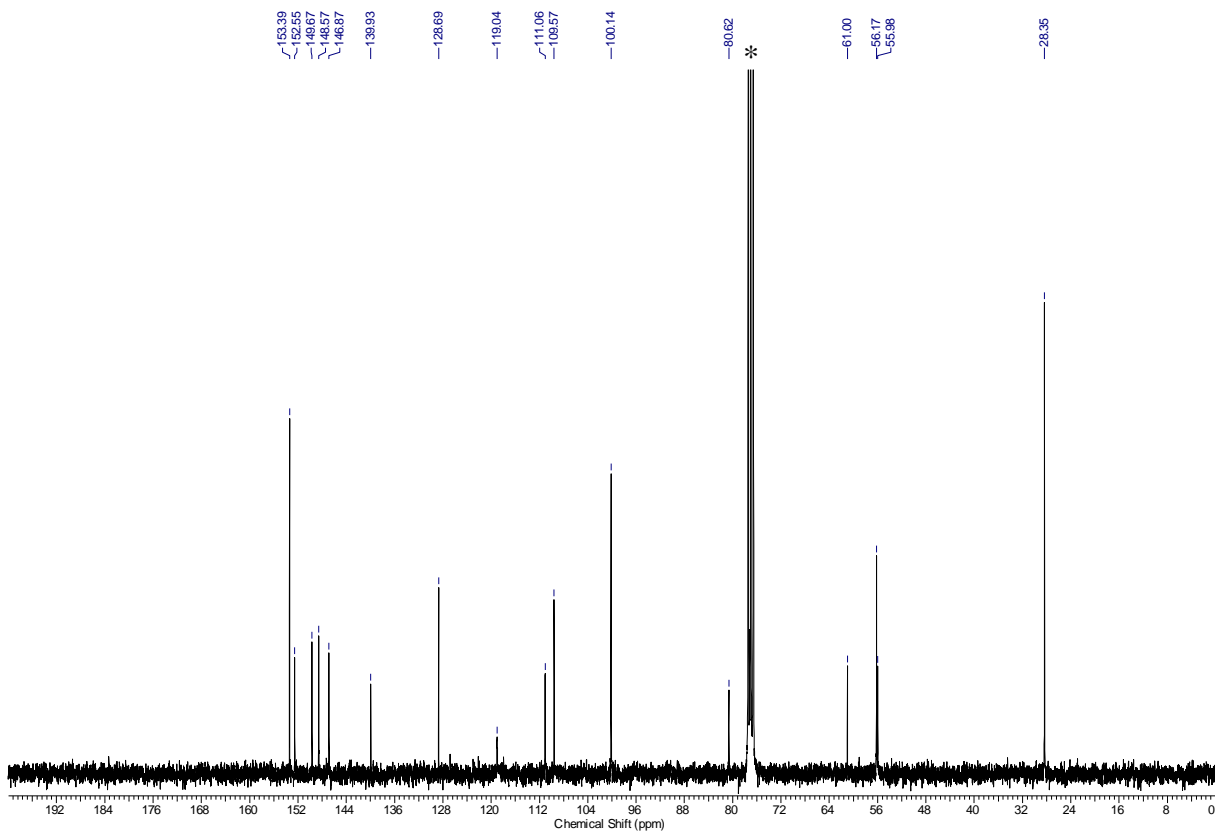

$^1\text{H-NMR}$  (300 MHz,  $\text{CDCl}_3$ ) and  $^{13}\text{C-NMR}$  (75 MHz,  $\text{CDCl}_3$ ) spectrum of compound **34**. \* = NMR-solvent

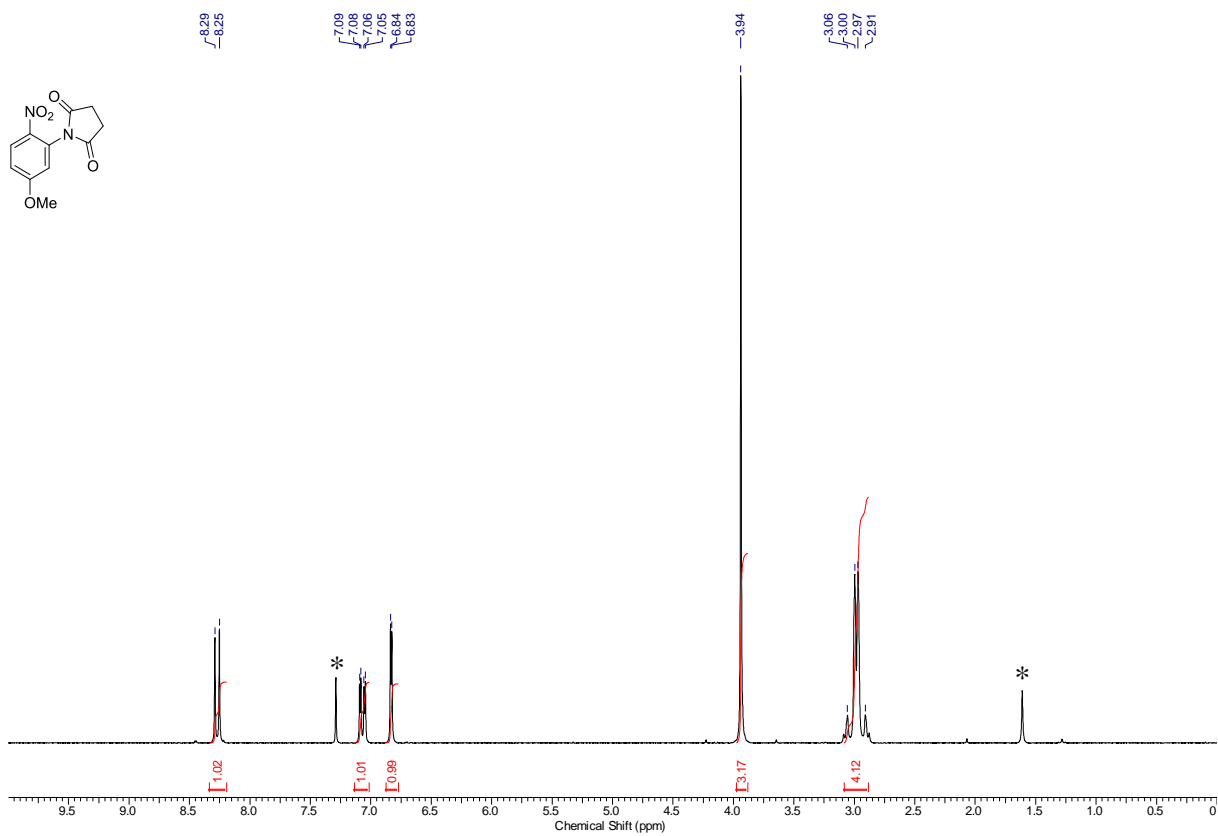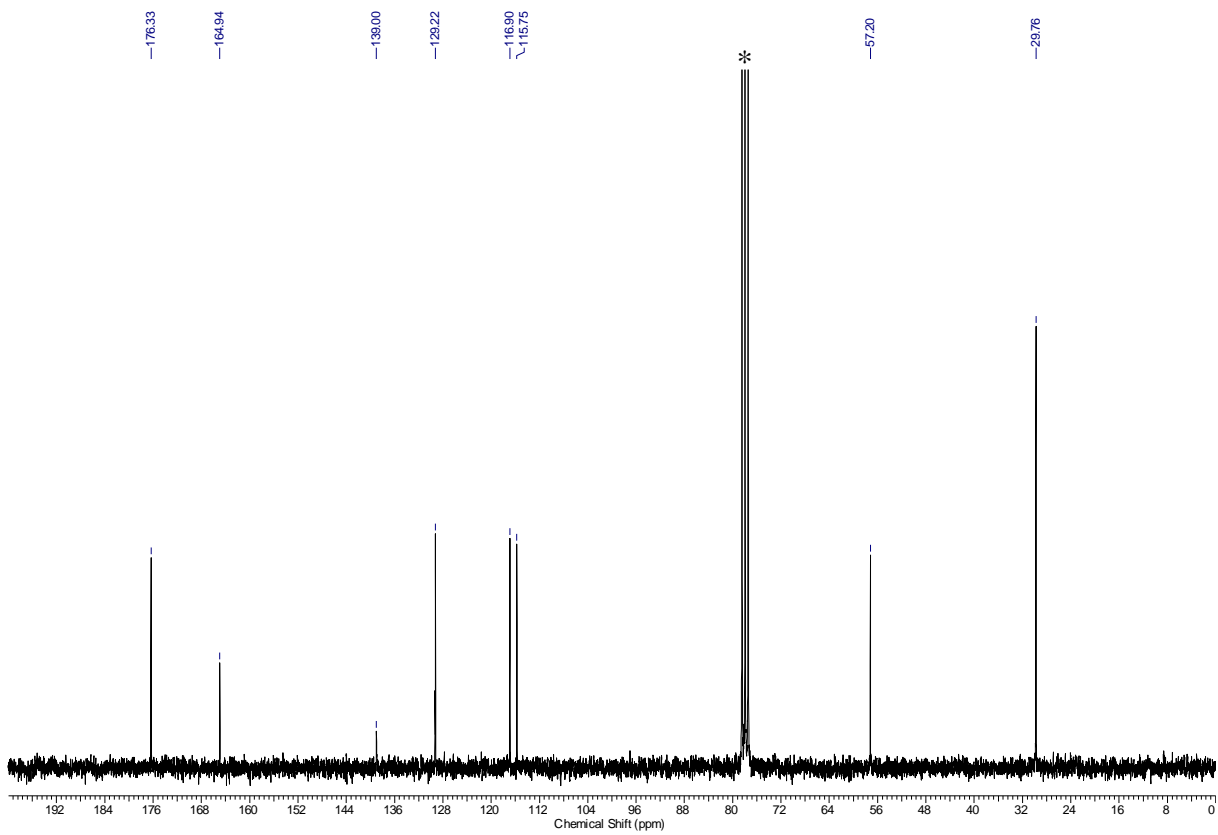

<sup>1</sup>H-NMR (250 MHz, CDCl<sub>3</sub>) and <sup>13</sup>C-NMR (63MHz, CDCl<sub>3</sub>) spectrum of compound *p*-35. \* = NMR-solvent, H<sub>2</sub>O

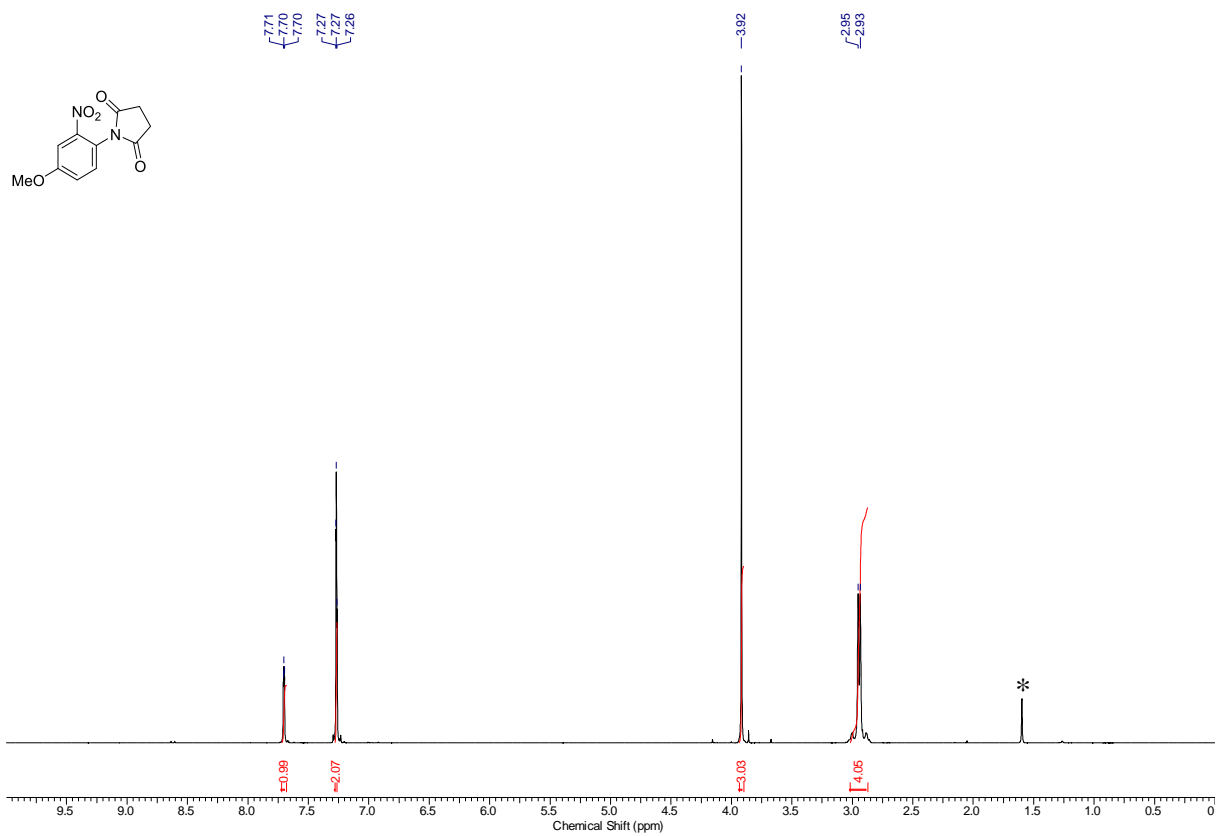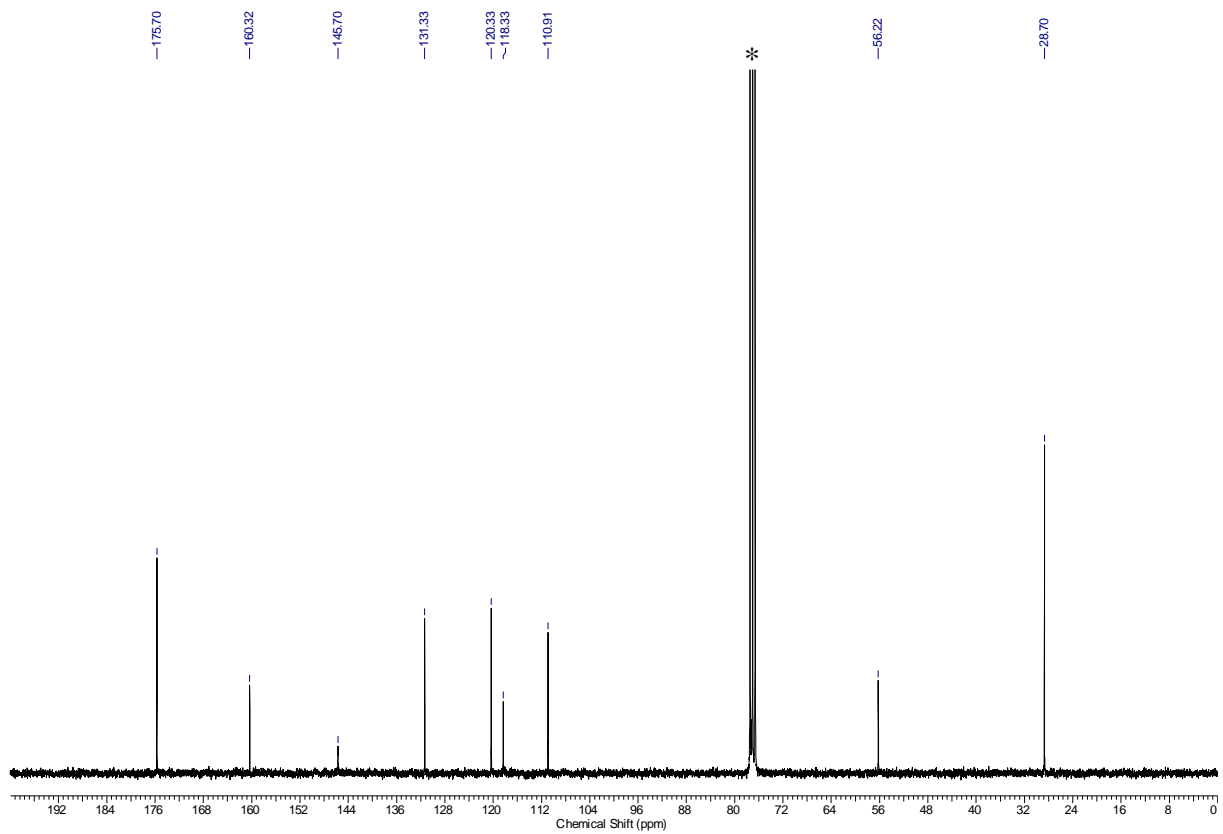

<sup>1</sup>H-NMR (300 MHz, CDCl<sub>3</sub>) and <sup>13</sup>C-NMR (75 MHz, CDCl<sub>3</sub>) spectrum of compound **m-35**. \* = NMR-solvent, H<sub>2</sub>O

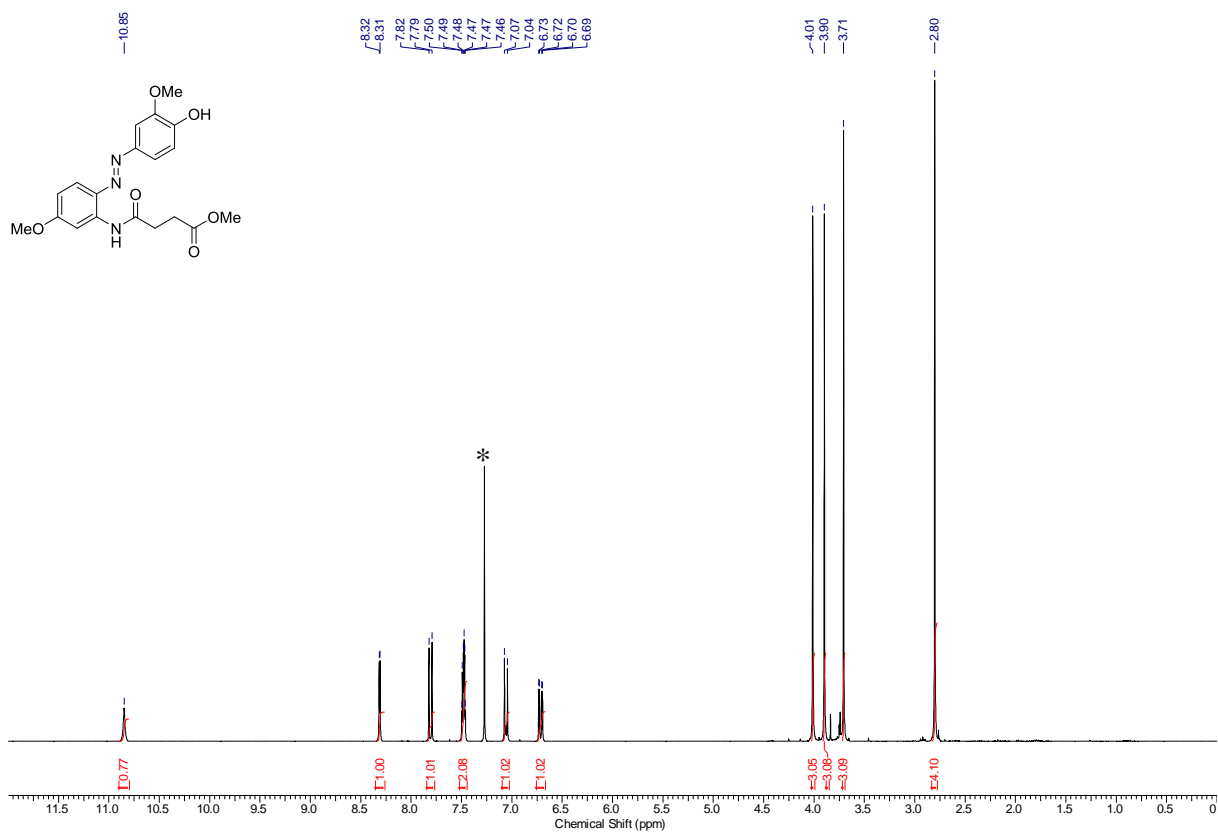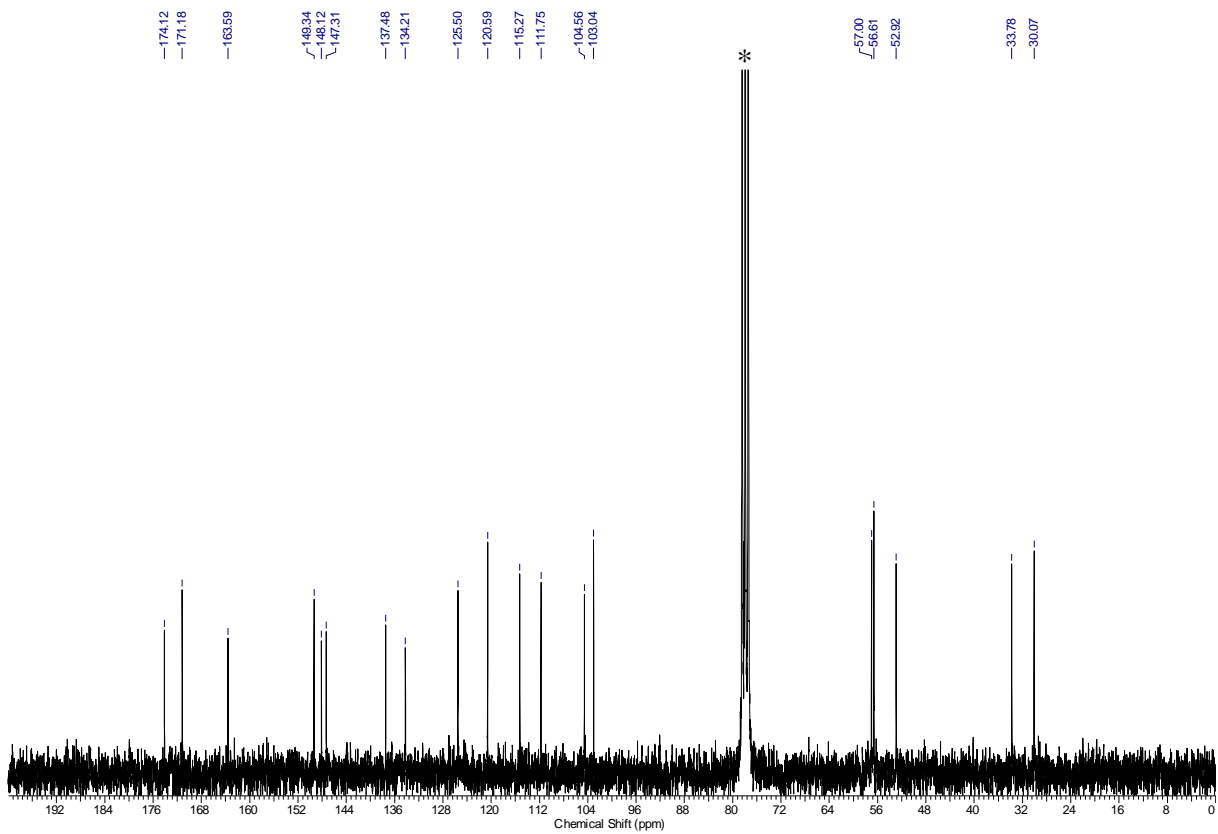

<sup>1</sup>H-NMR (300 MHz, CDCl<sub>3</sub>) and <sup>13</sup>C-NMR (63 MHz, CDCl<sub>3</sub>) spectrum of compound **36a**. \* = NMR-solvent

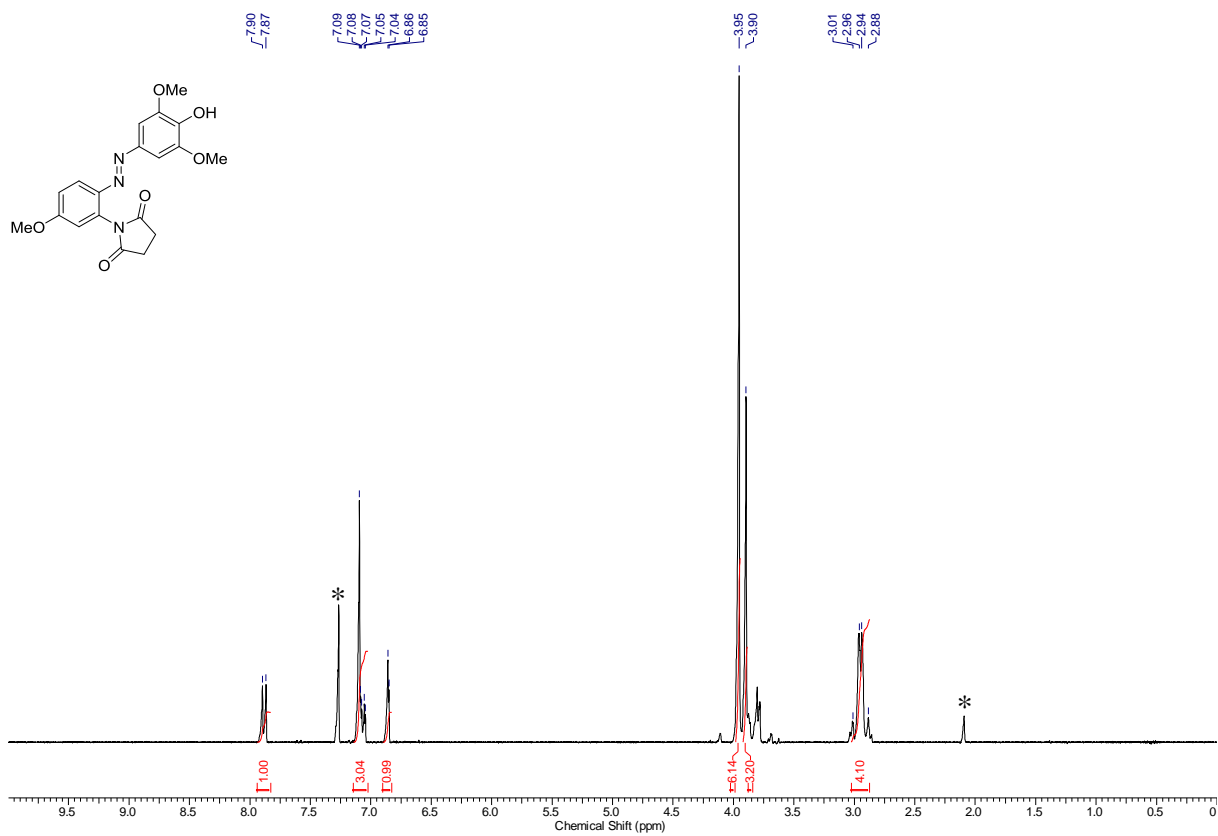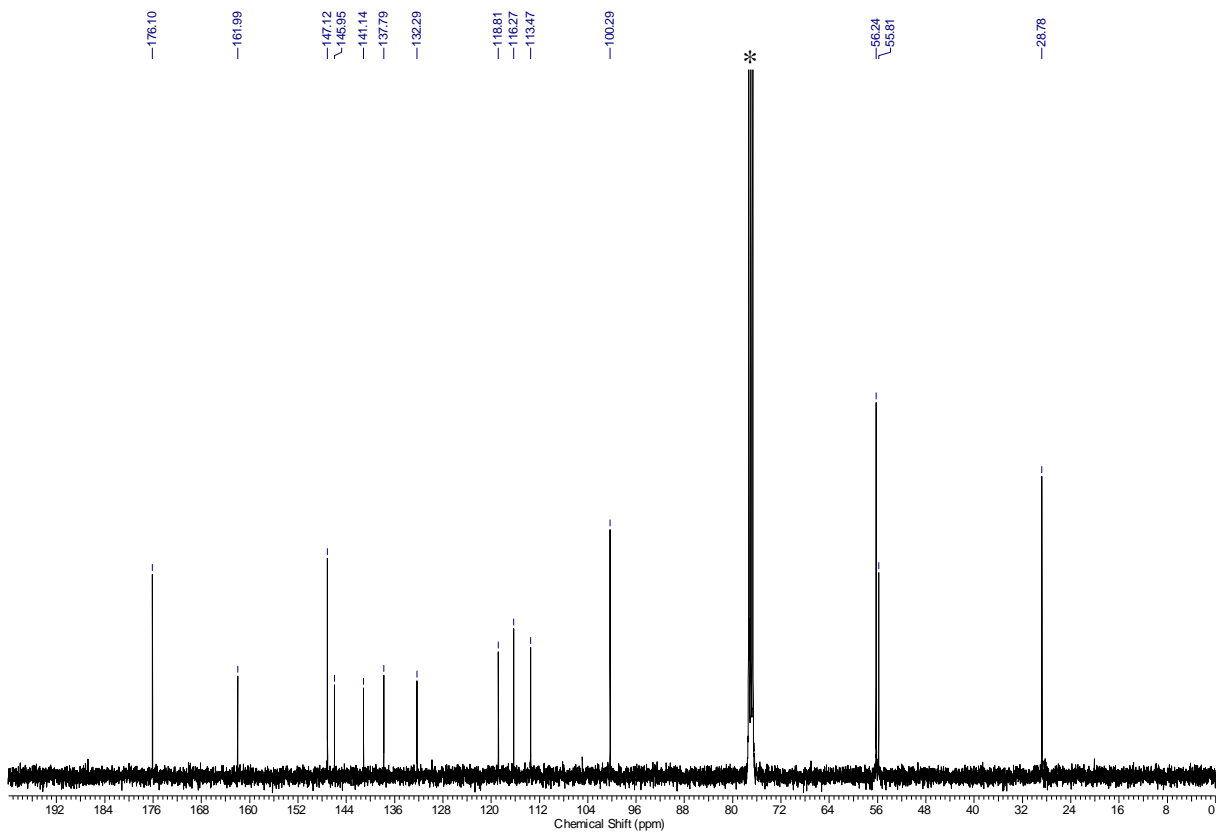

<sup>1</sup>H-NMR (300 MHz, CDCl<sub>3</sub>) and <sup>13</sup>C-NMR (101 MHz, CDCl<sub>3</sub>) spectrum of compound **36b**. \* = NMR-solvent, CH<sub>3</sub>CN

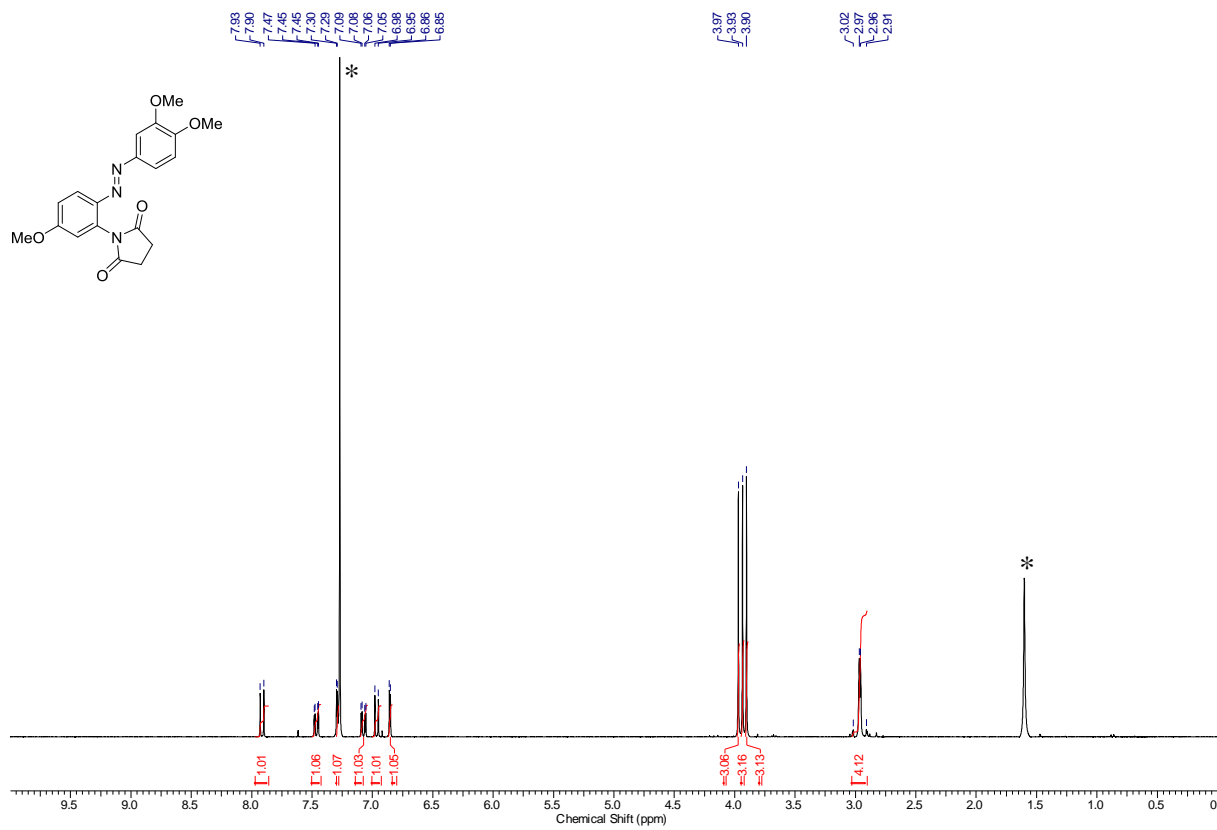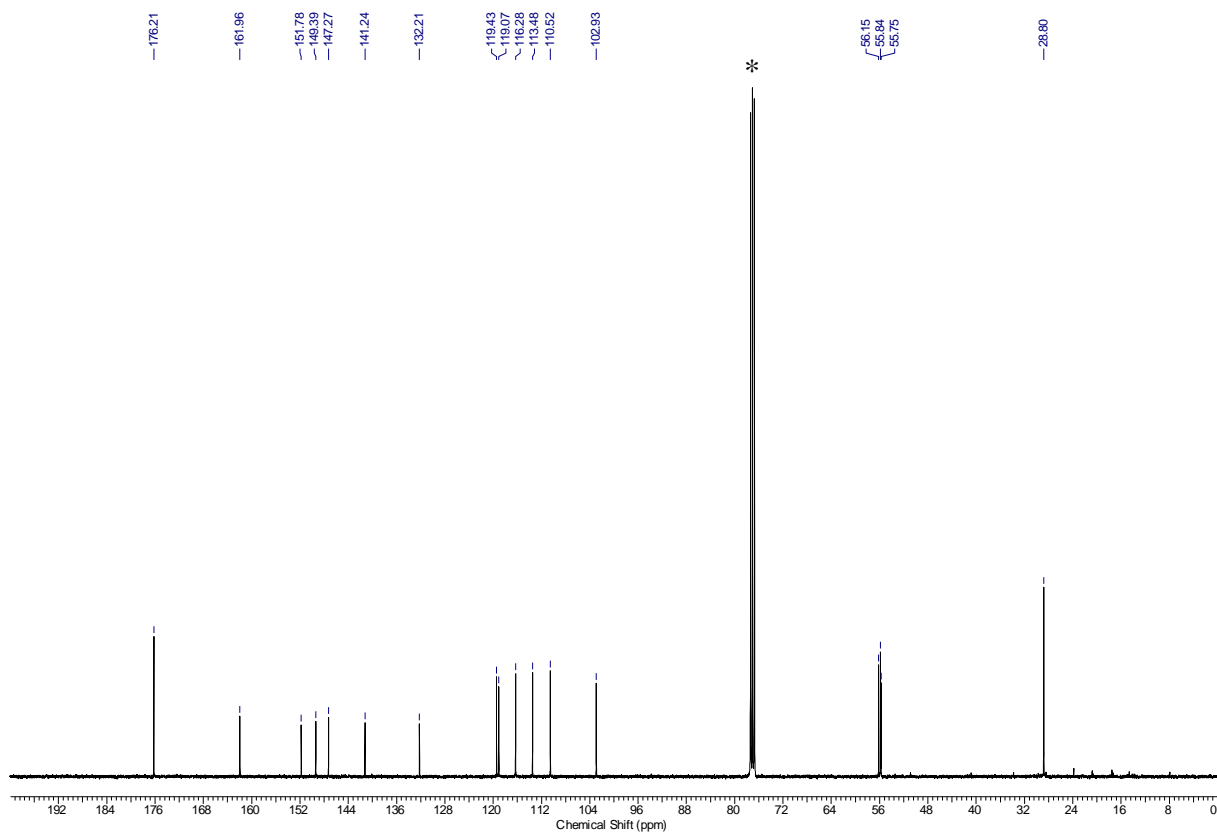

<sup>1</sup>H-NMR (300 MHz, CDCl<sub>3</sub>) and <sup>13</sup>C-NMR (101 MHz, CDCl<sub>3</sub>) spectrum of compound **37a**. \* = NMR-solvent, H<sub>2</sub>O

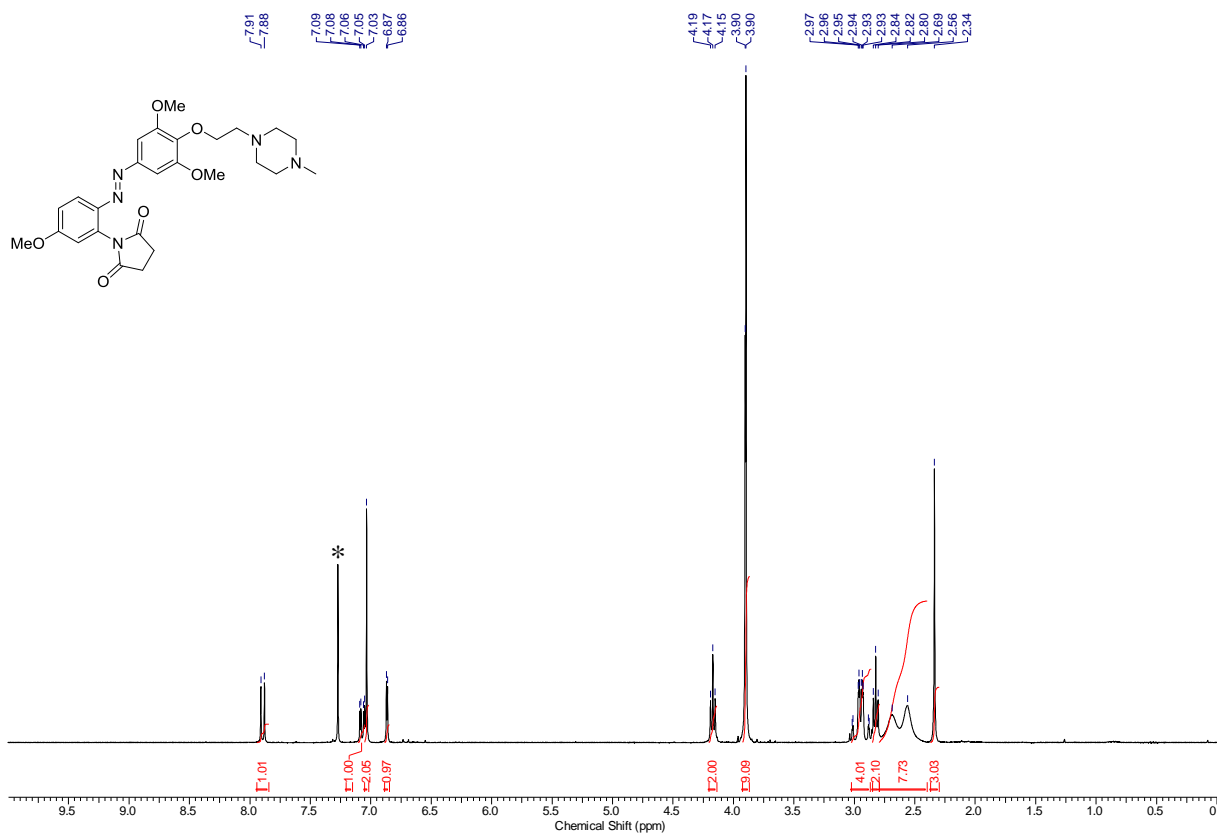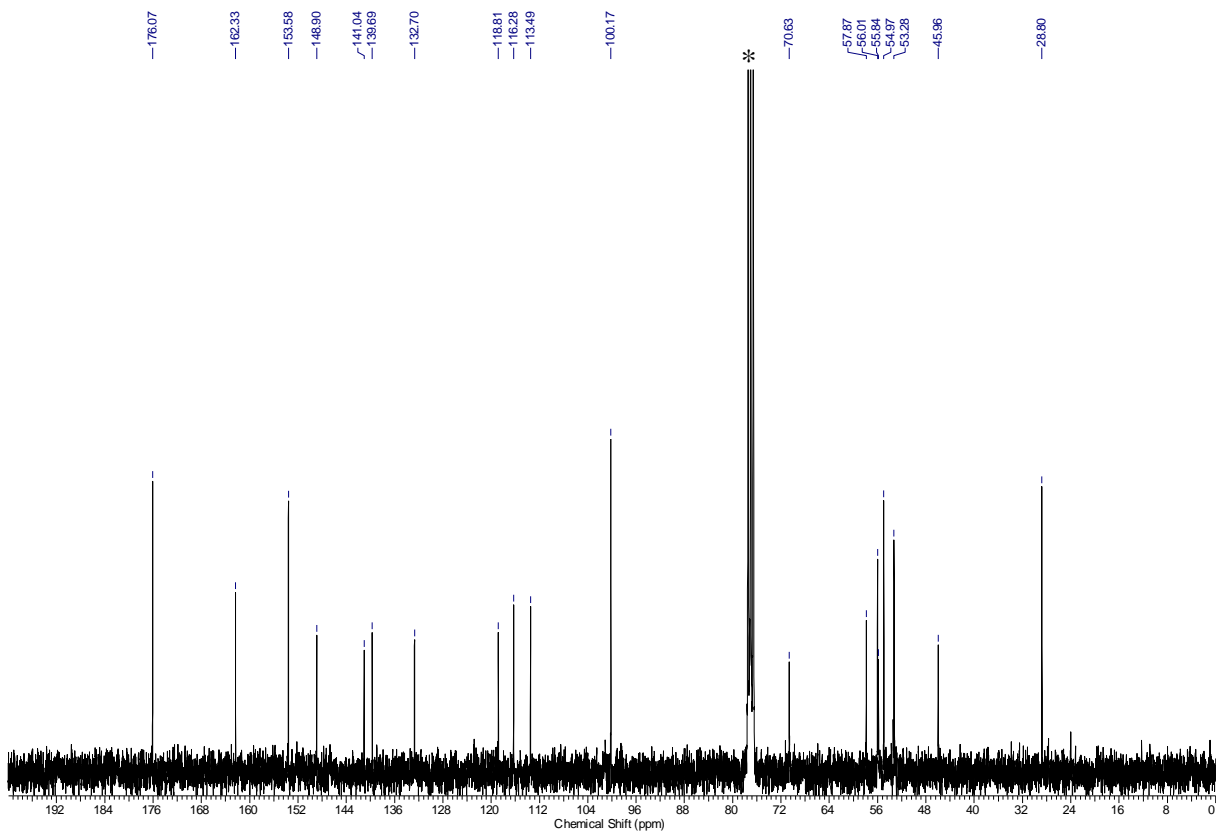

<sup>1</sup>H-NMR (300 MHz, CDCl<sub>3</sub>) and <sup>13</sup>C-NMR (75 MHz, CDCl<sub>3</sub>) spectrum of compound **37b**. \* = NMR-solvent

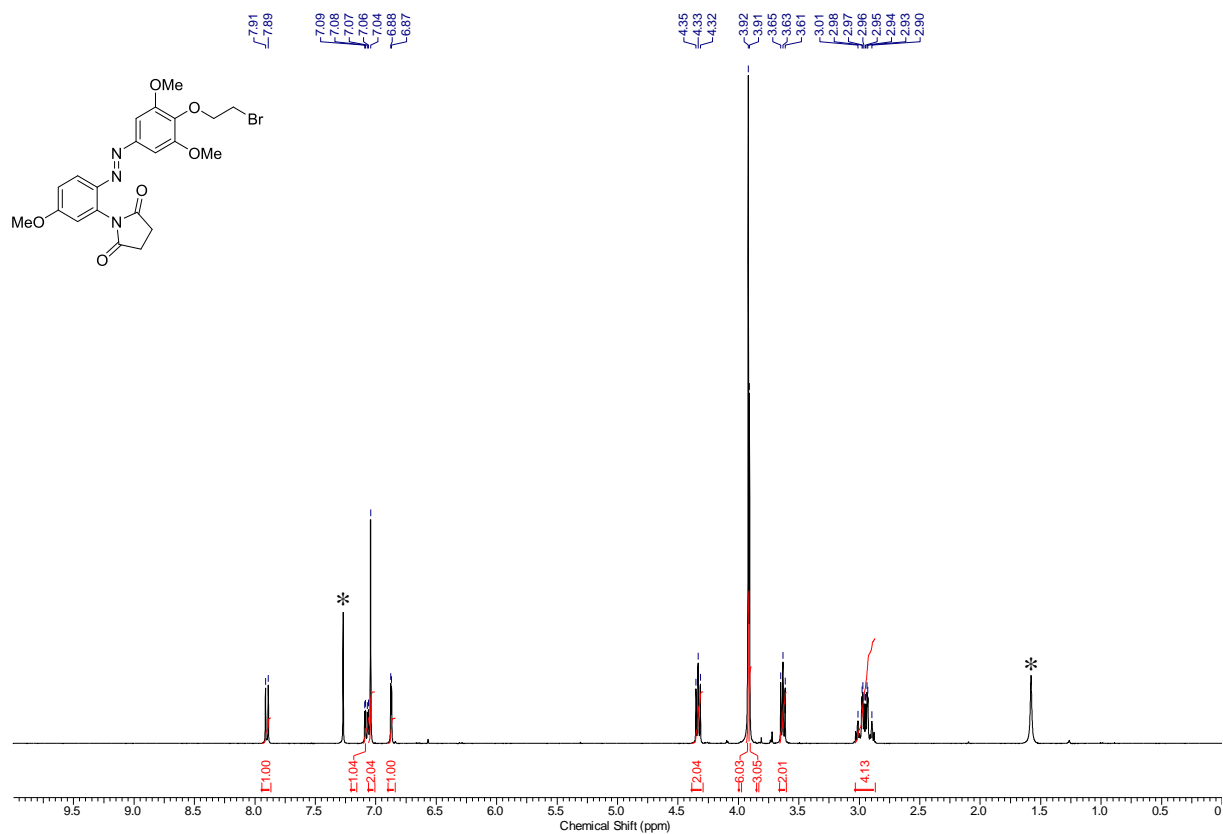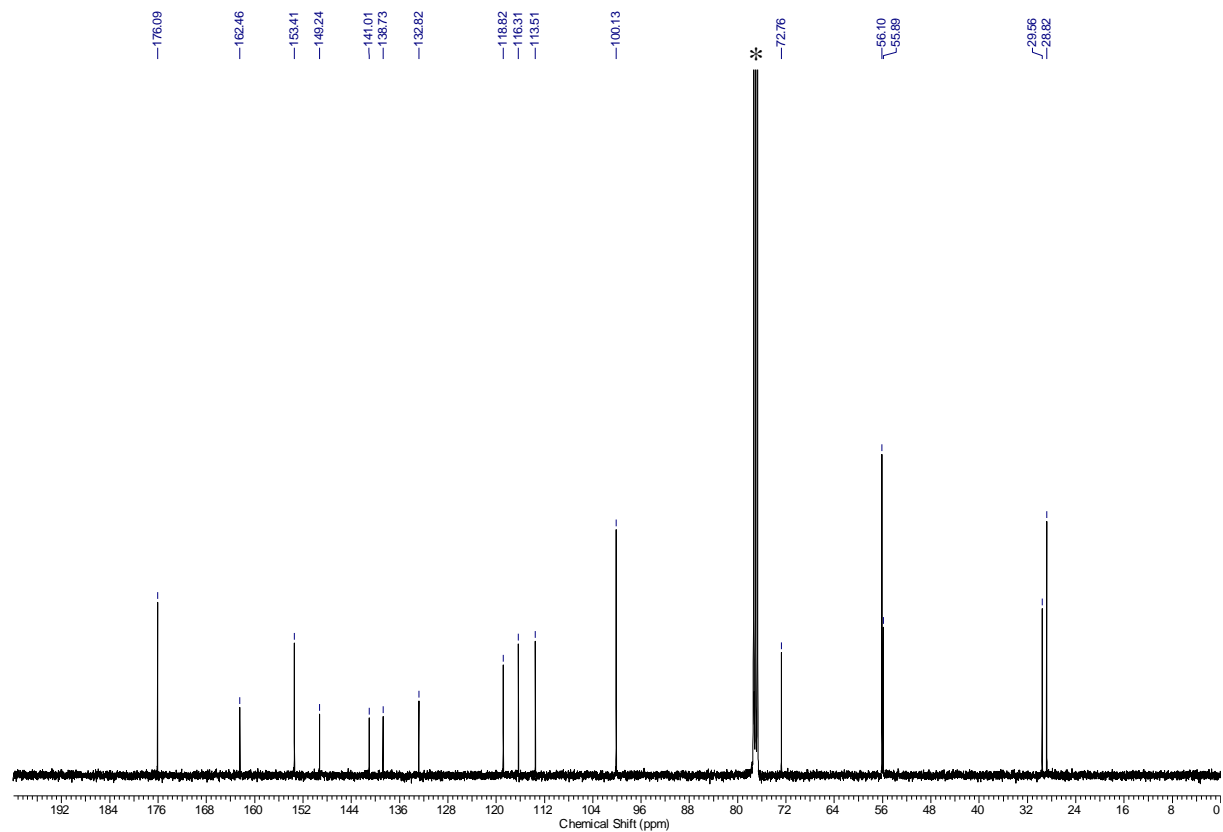

<sup>1</sup>H-NMR (400 MHz, CDCl<sub>3</sub>) and <sup>13</sup>C-NMR (101 MHz, CDCl<sub>3</sub>) spectrum of compound 37c. \* = NMR-solvent, H<sub>2</sub>O



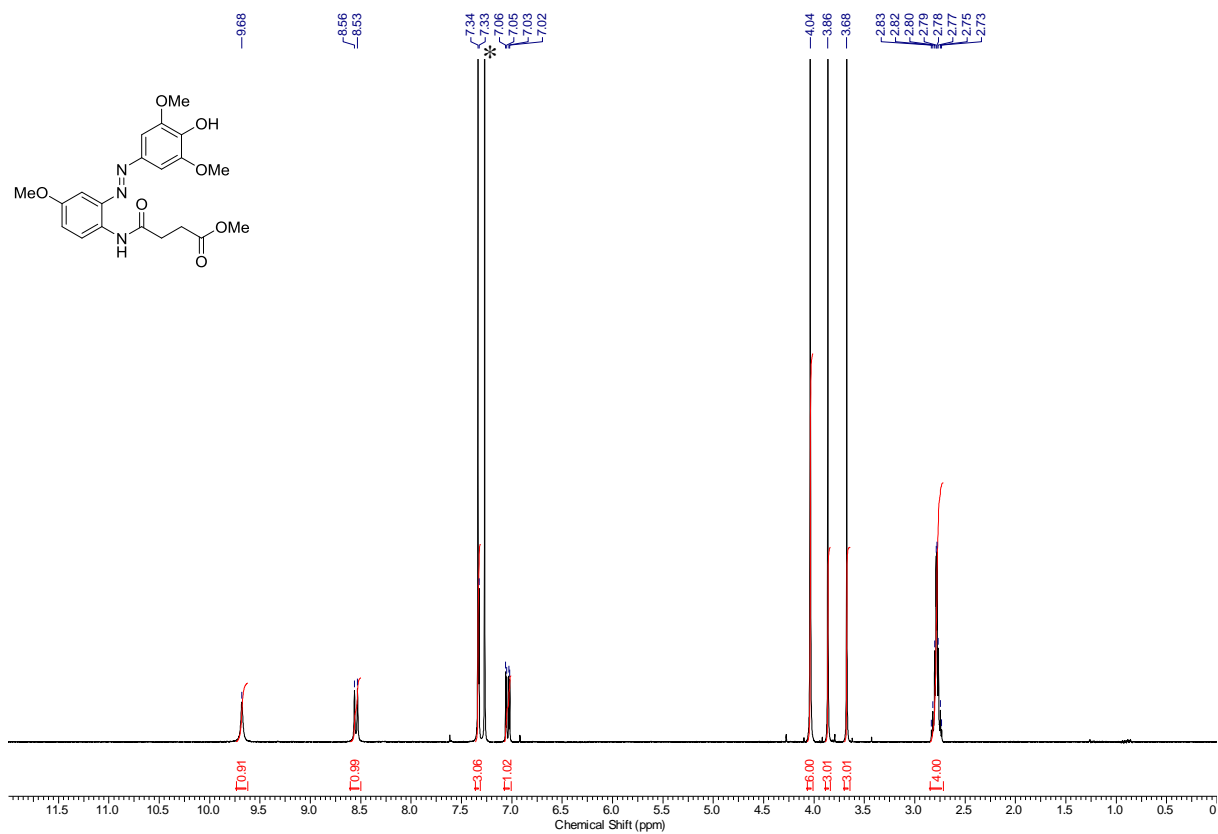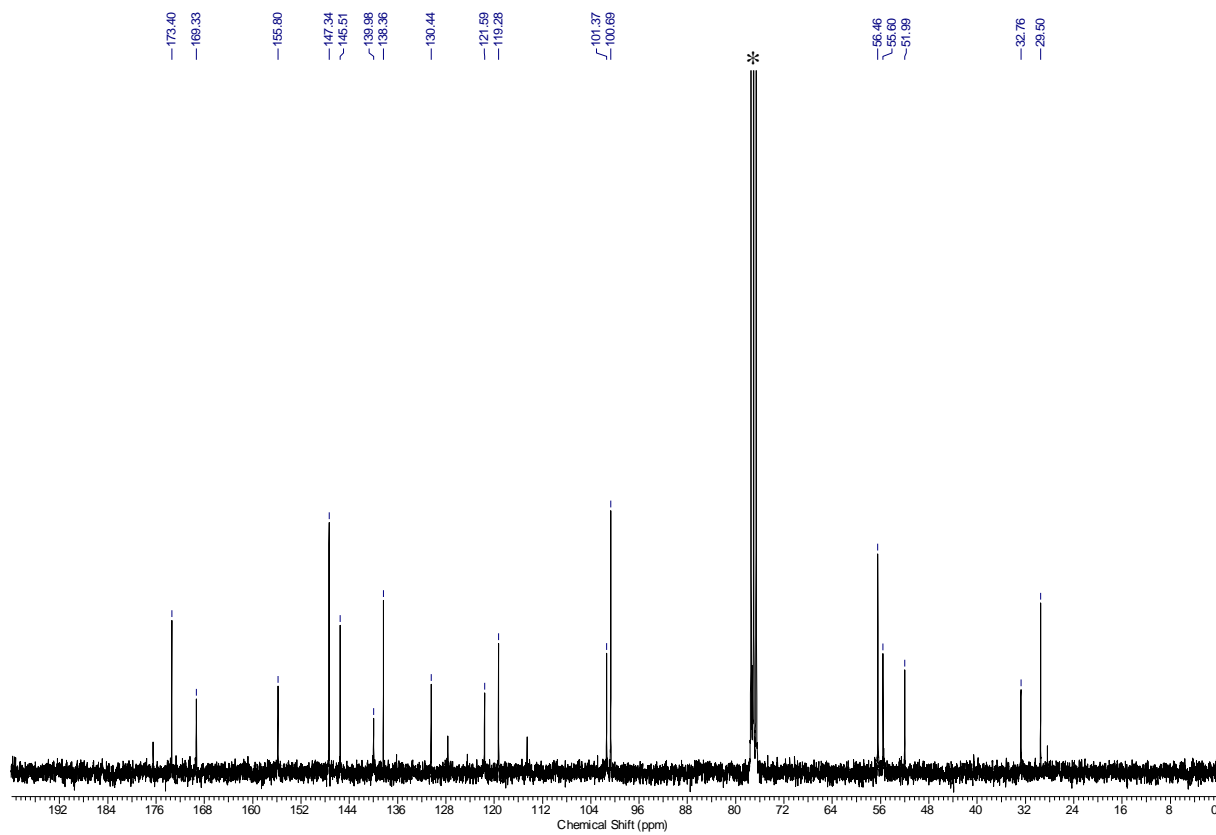

<sup>1</sup>H-NMR (300 MHz, CDCl<sub>3</sub>) and <sup>13</sup>C-NMR (75 MHz, CDCl<sub>3</sub>) spectrum of compound 38. \* = NMR-solvent

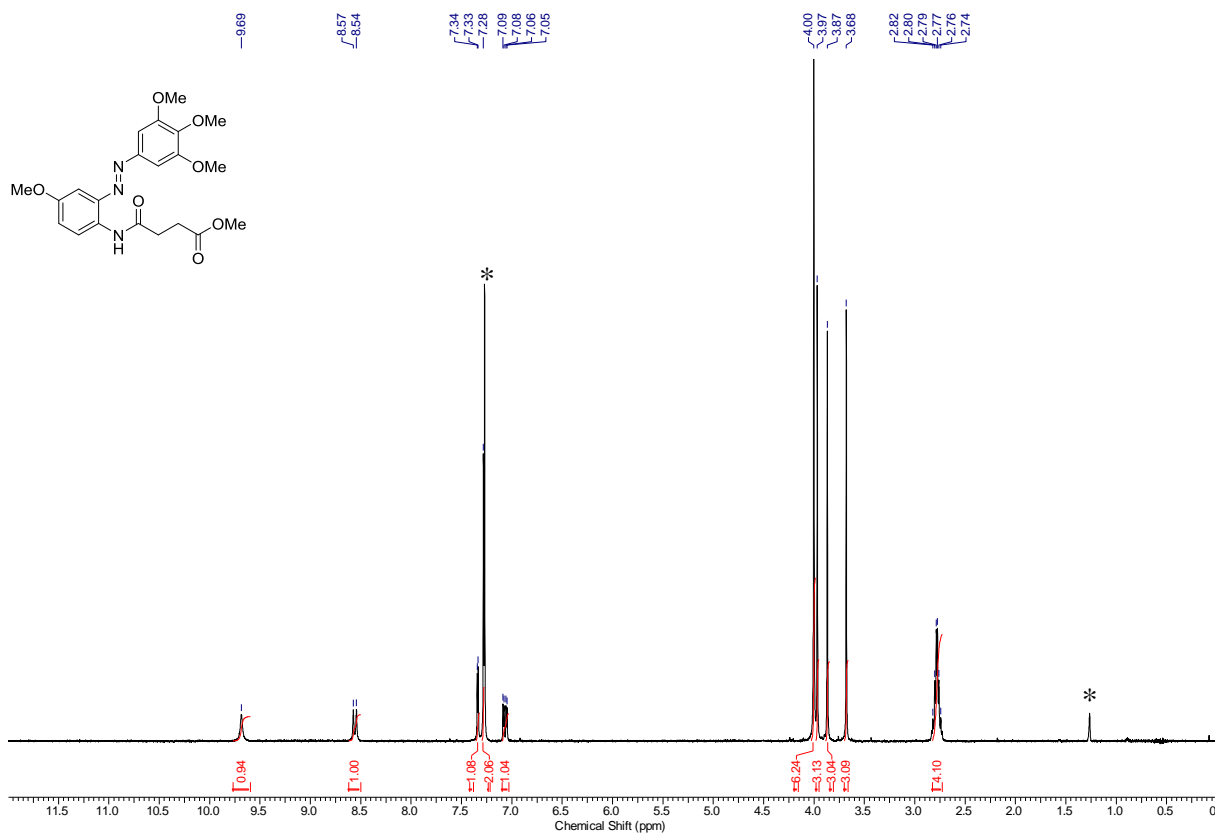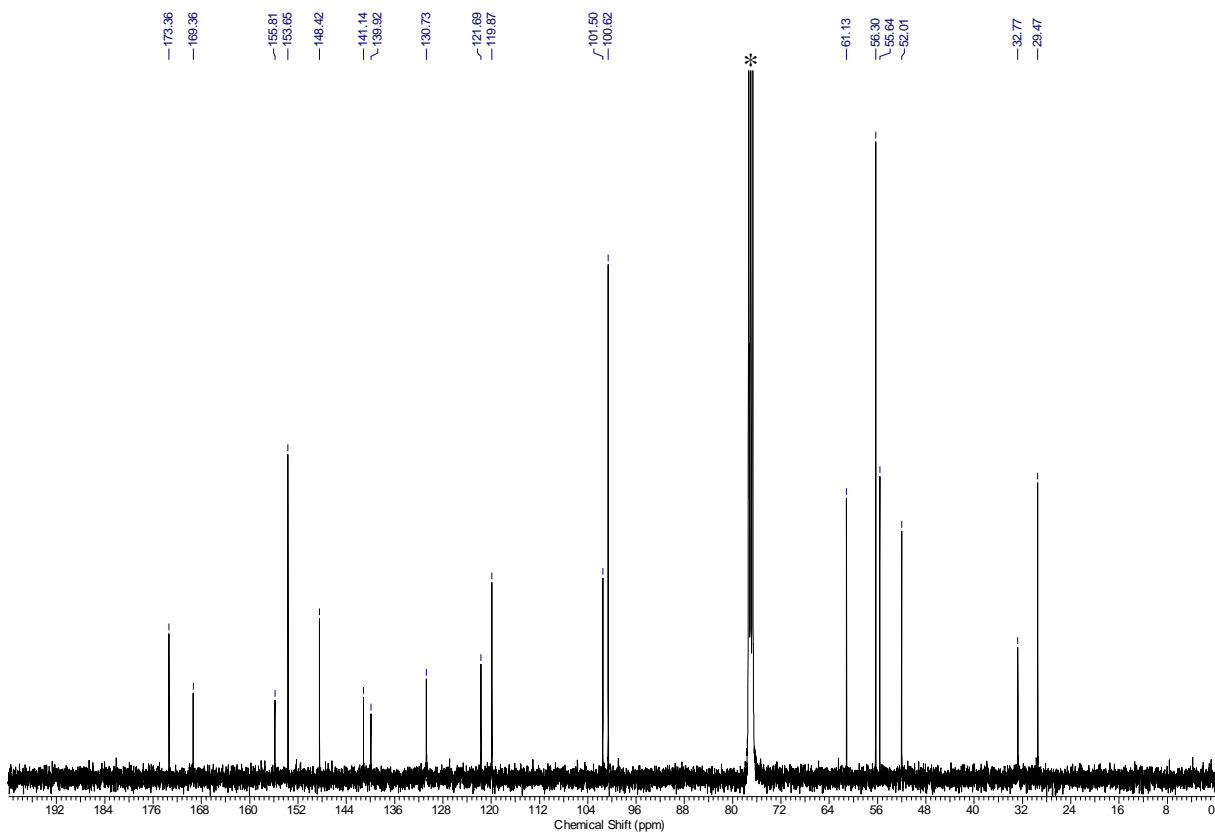

<sup>1</sup>H-NMR (300 MHz, CDCl<sub>3</sub>) and <sup>13</sup>C-NMR (101 MHz, CDCl<sub>3</sub>) spectrum of compound 39. \* = NMR-solvent, grease

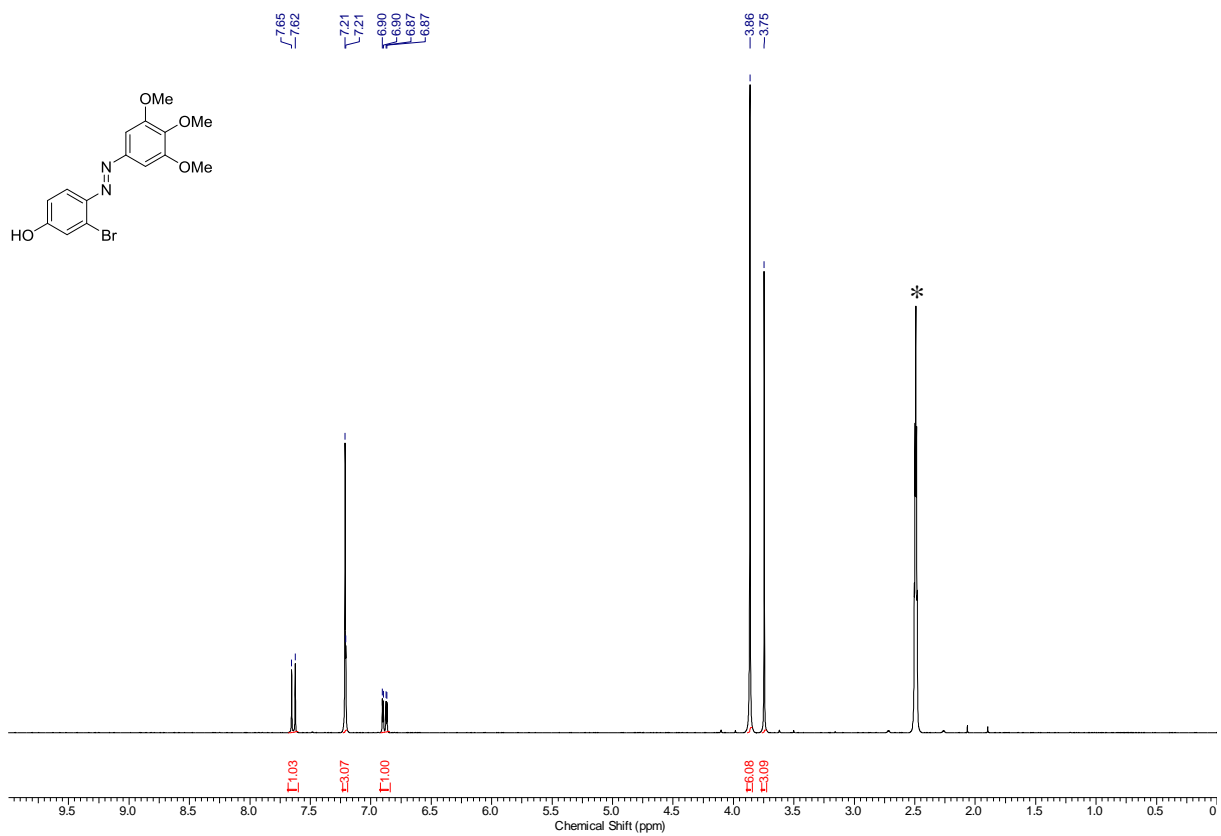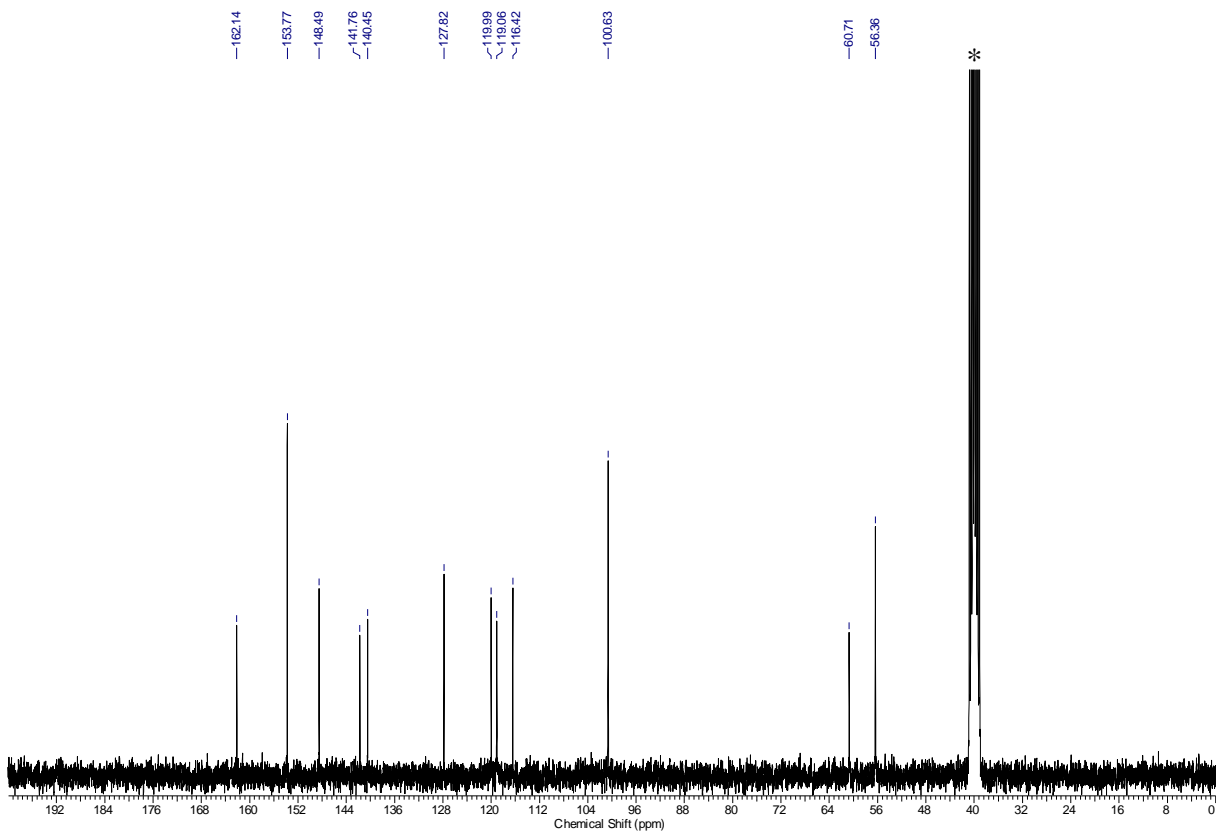

<sup>1</sup>H-NMR (300 MHz, DMSO-*d*<sub>6</sub>) and <sup>13</sup>C-NMR (75 MHz, DMSO-*d*<sub>6</sub>) spectrum of compound 41a.

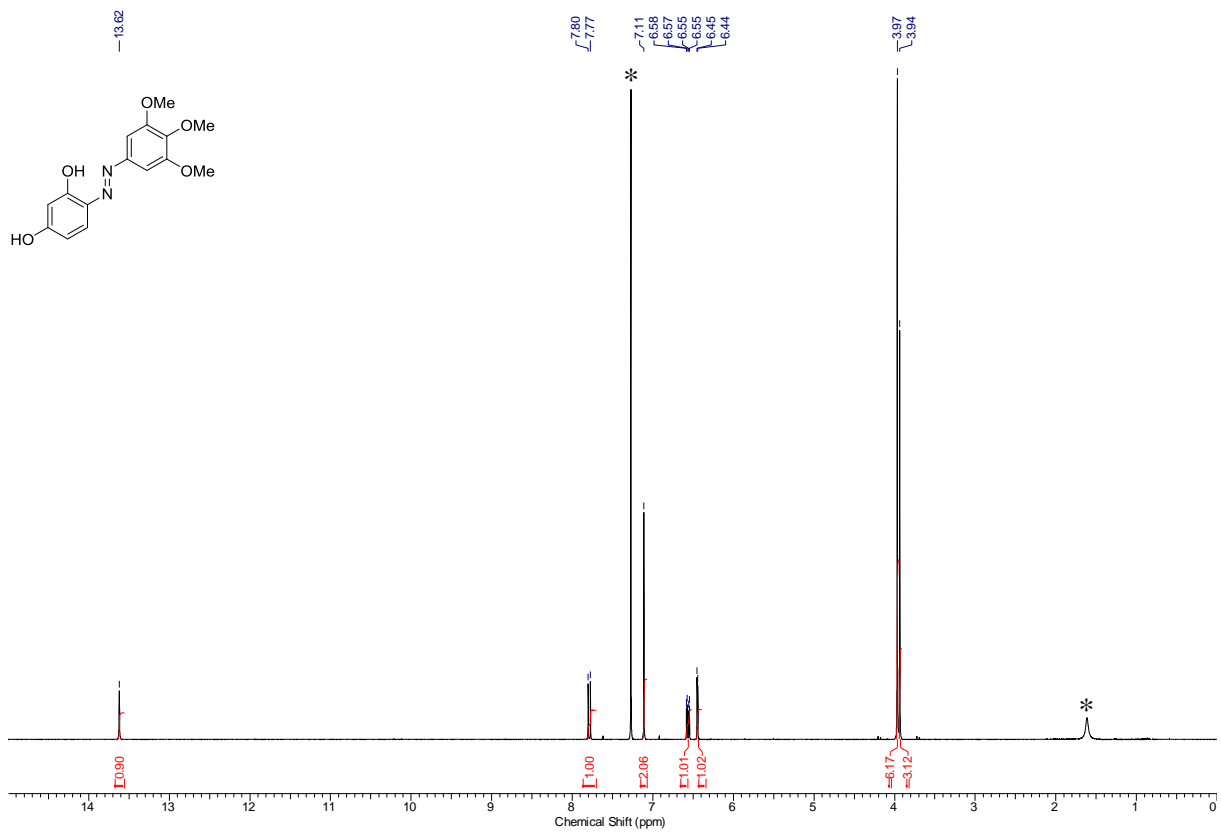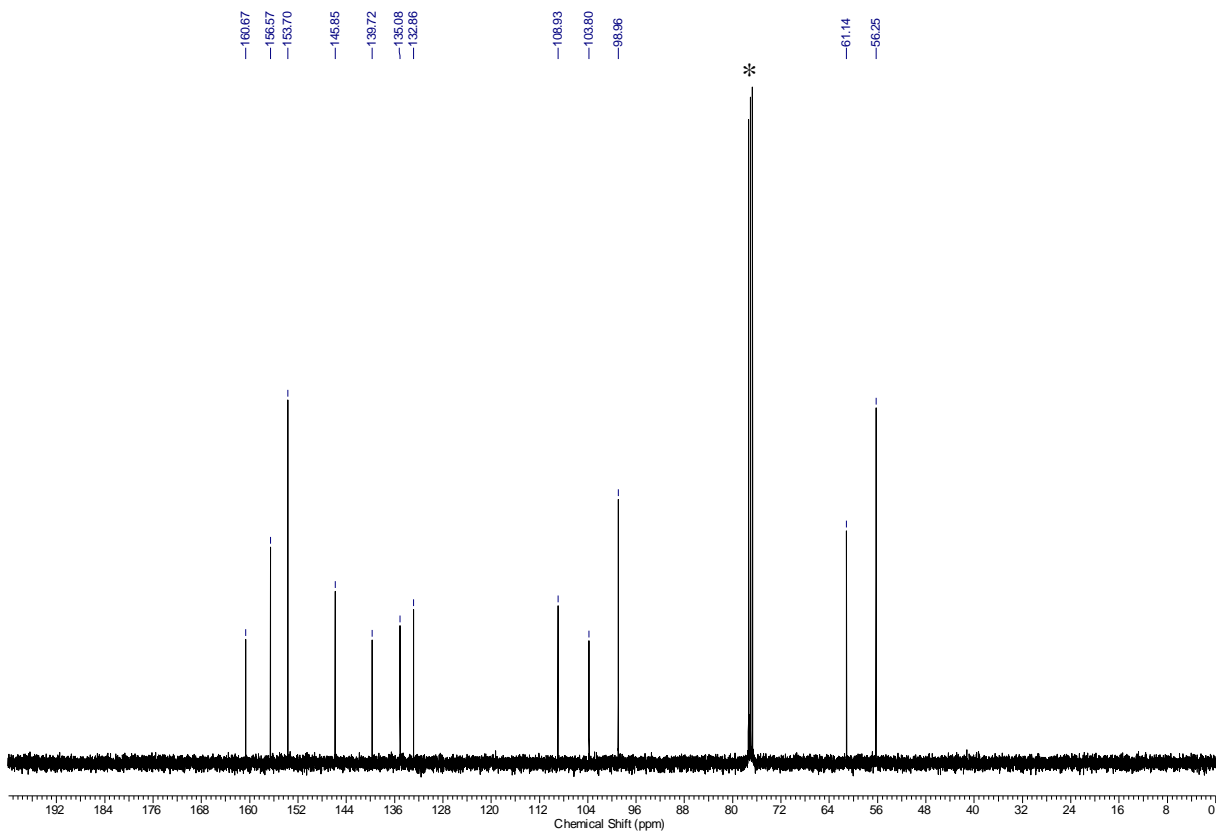

<sup>1</sup>H-NMR (400 MHz, CDCl<sub>3</sub>) and <sup>13</sup>C-NMR (101 MHz, CDCl<sub>3</sub>) spectrum of compound **41b**. \* = NMR-solvent, H<sub>2</sub>O

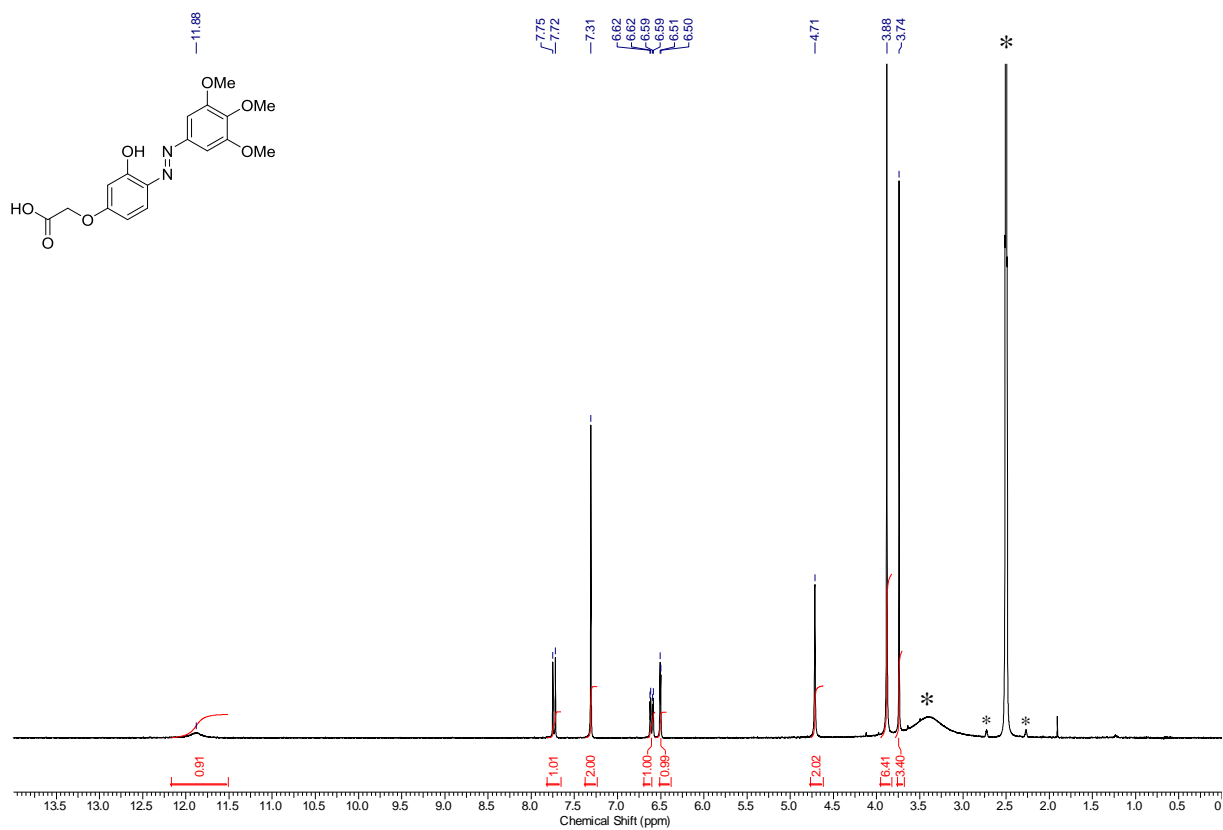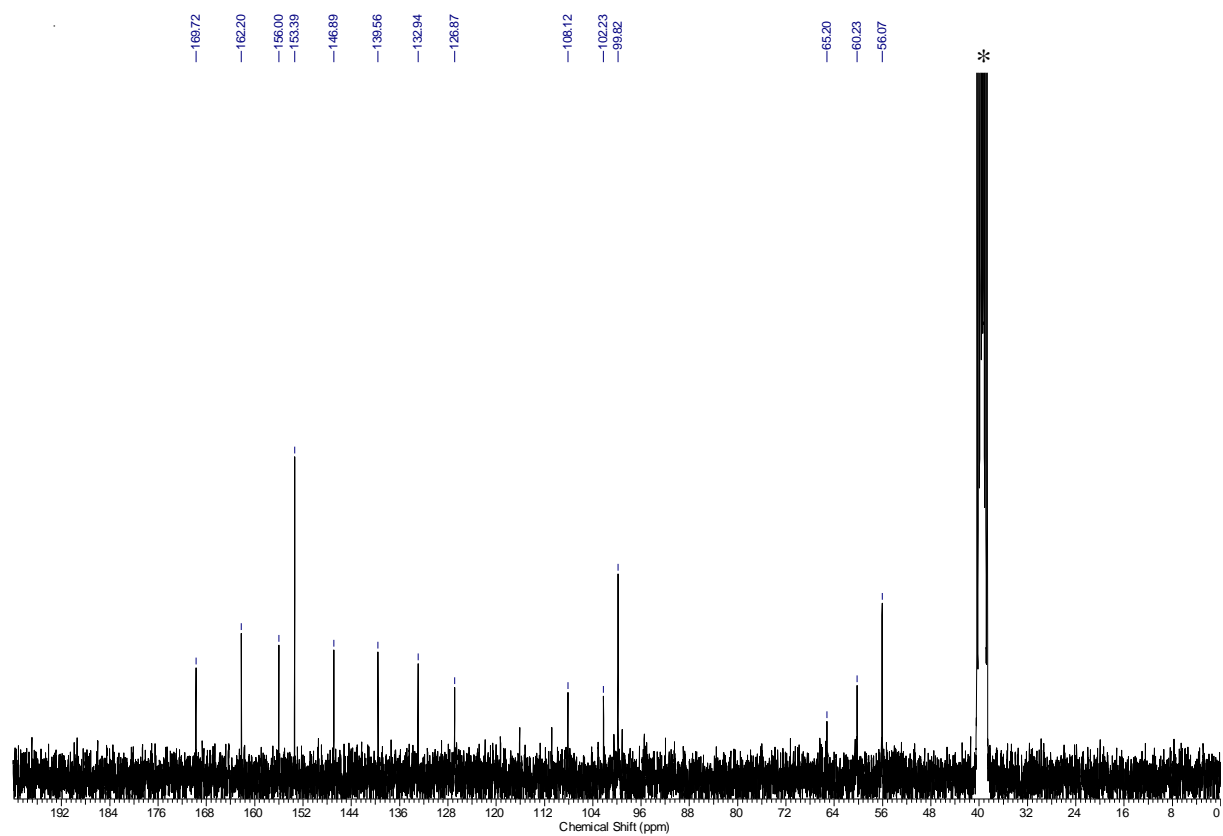

<sup>1</sup>H-NMR (300 MHz, DMSO-*d*<sub>6</sub>) and <sup>13</sup>C-NMR (75 MHz, DMSO-*d*<sub>6</sub>) spectrum of compound **42b**. \* = NMR-solvent, H<sub>2</sub>O

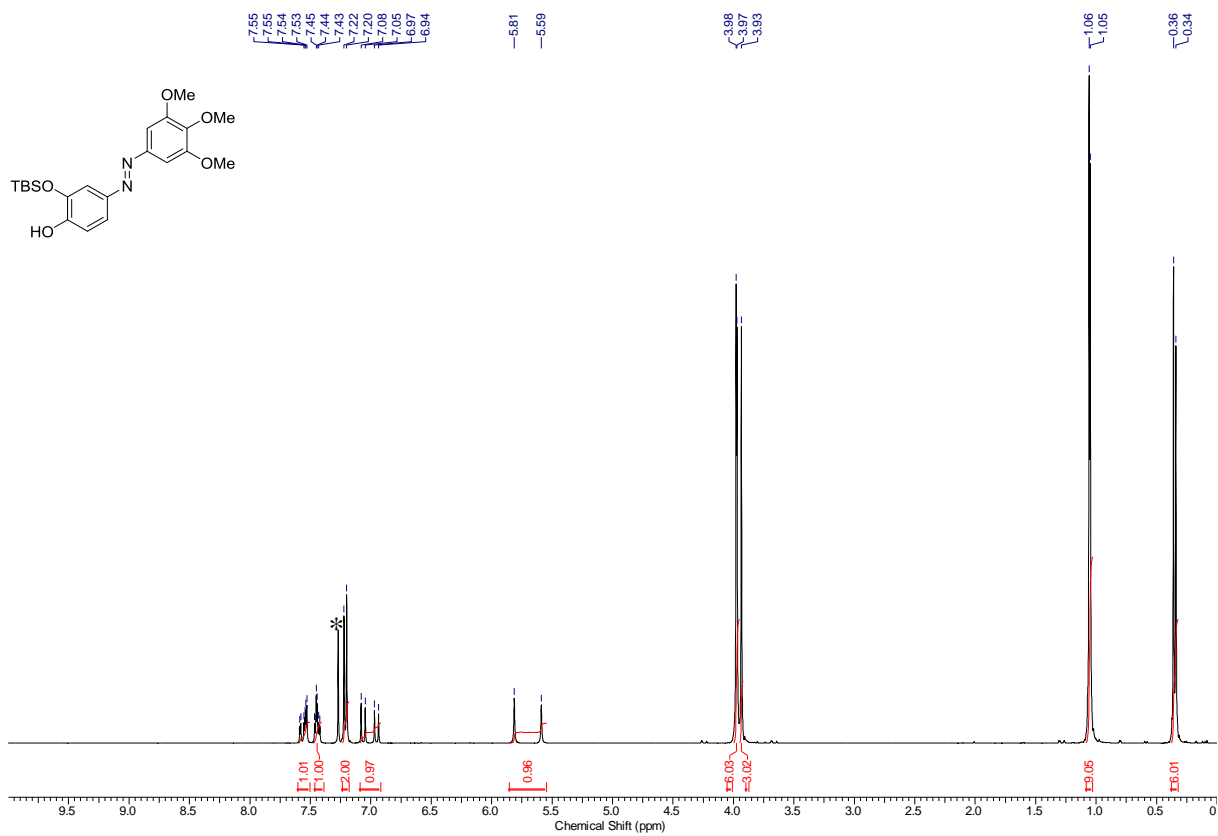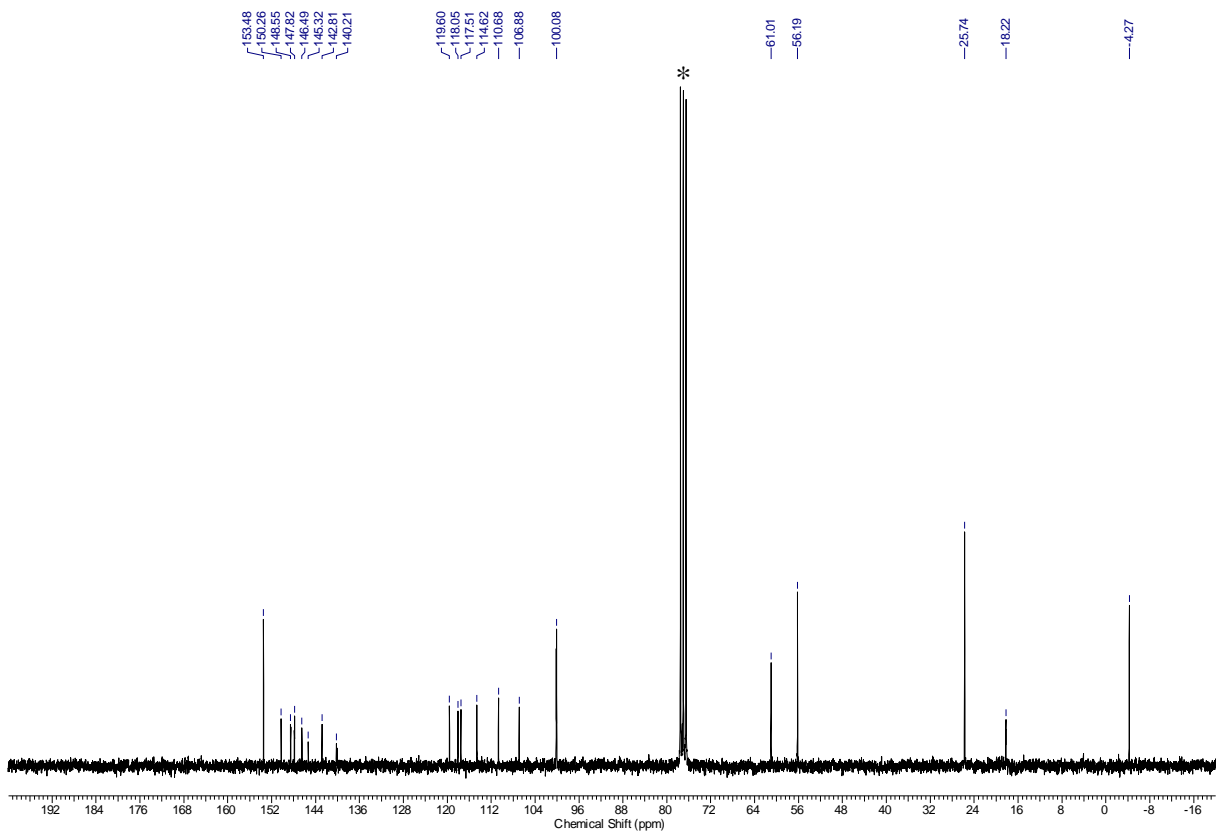

<sup>1</sup>H-NMR (250 MHz, CDCl<sub>3</sub>) and <sup>13</sup>C-NMR (63 MHz, CDCl<sub>3</sub>) spectrum of compound **44a**. \* = NMR-solvent

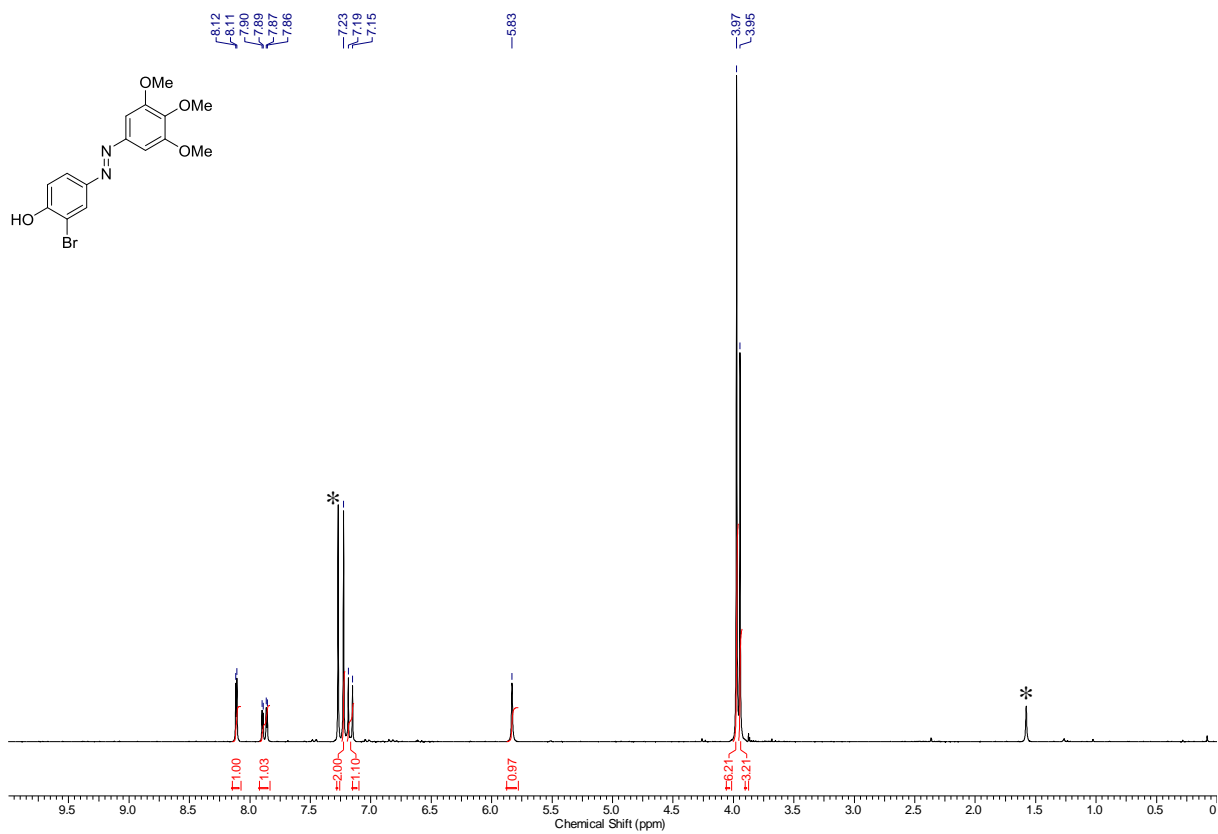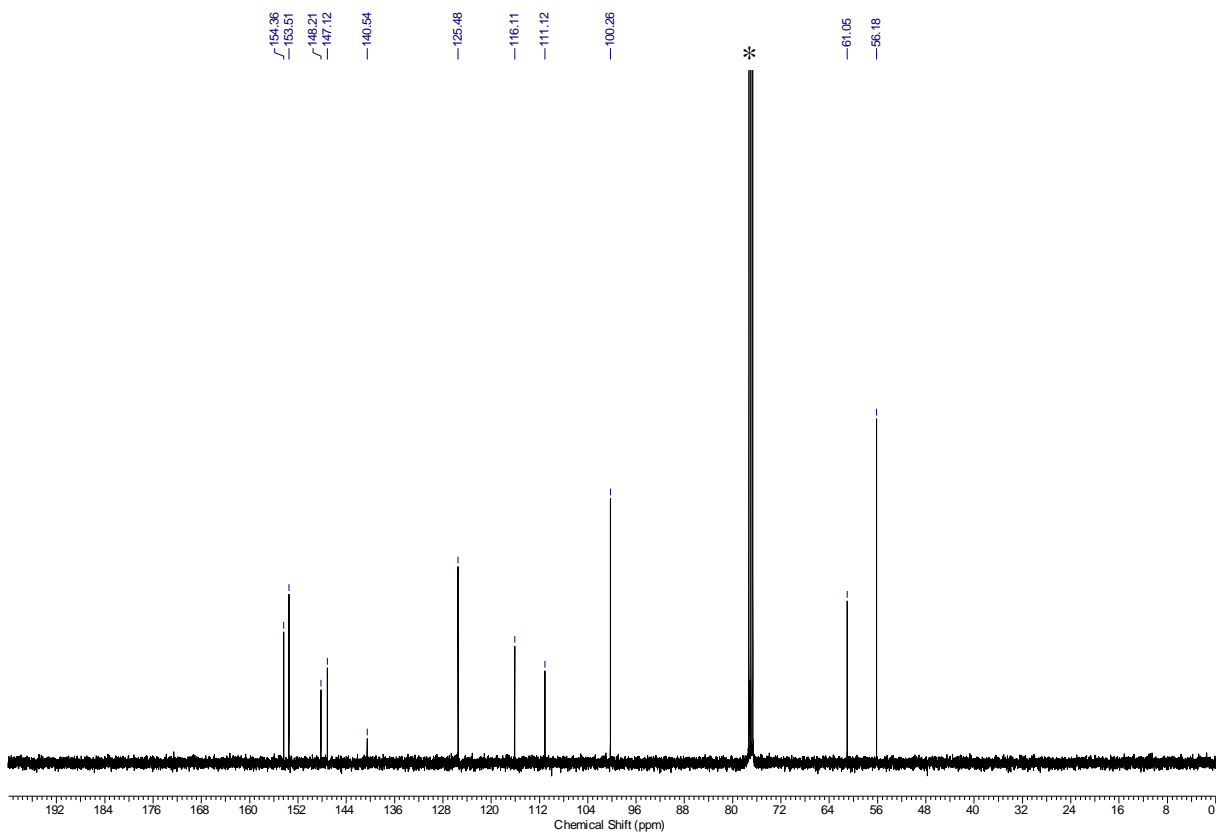

<sup>1</sup>H-NMR (250 MHz, CDCl<sub>3</sub>) and <sup>13</sup>C-NMR (101 MHz, CDCl<sub>3</sub>) spectrum of compound **44b**. \* = NMR-solvent, H<sub>2</sub>O

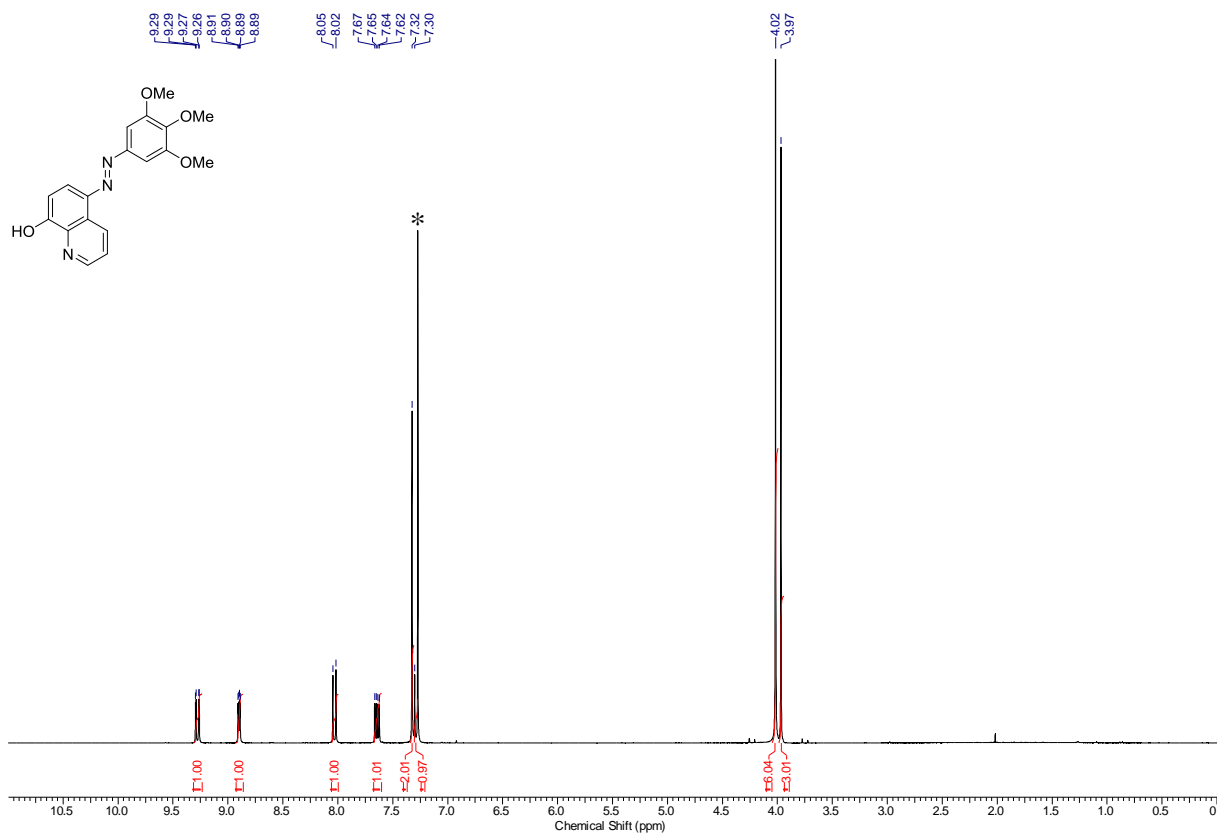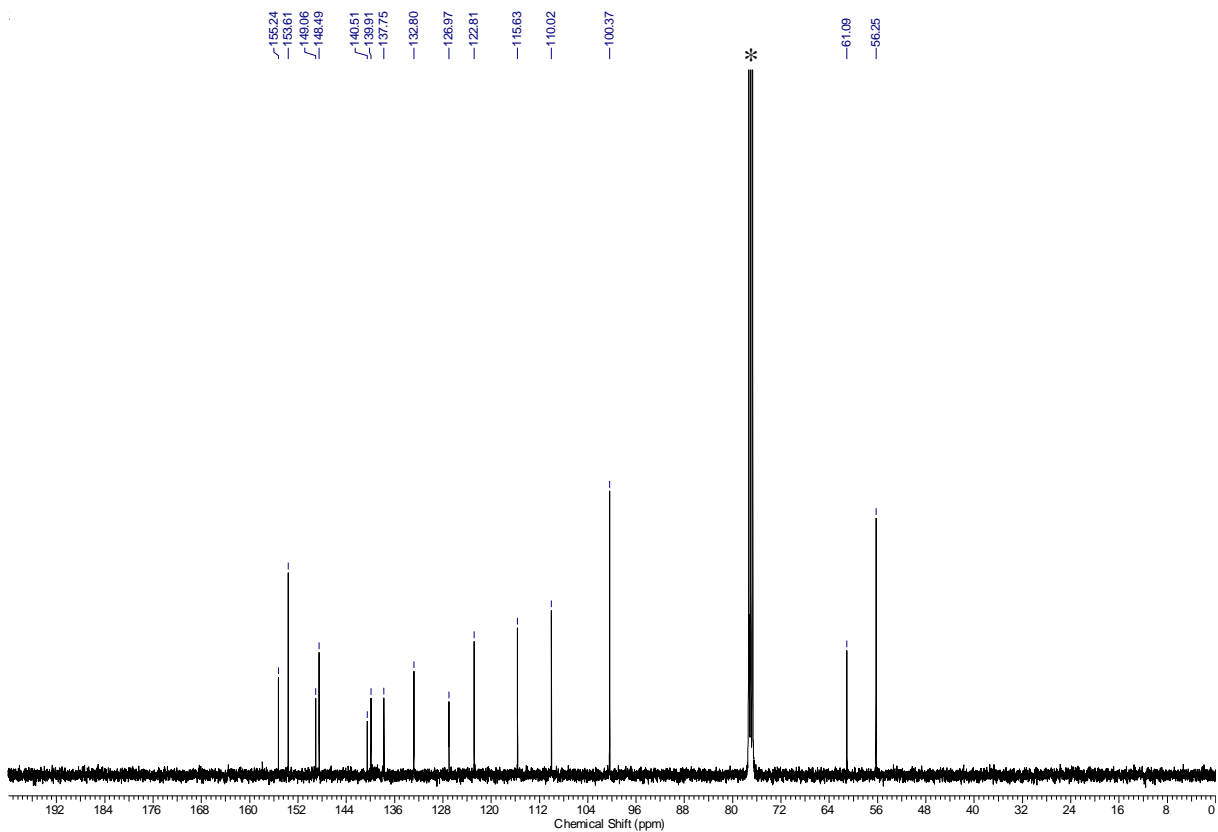

<sup>1</sup>H-NMR (300 MHz, CDCl<sub>3</sub>) and <sup>13</sup>C-NMR (101 MHz, CDCl<sub>3</sub>) spectrum of compound 46a. \* = NMR-solvent



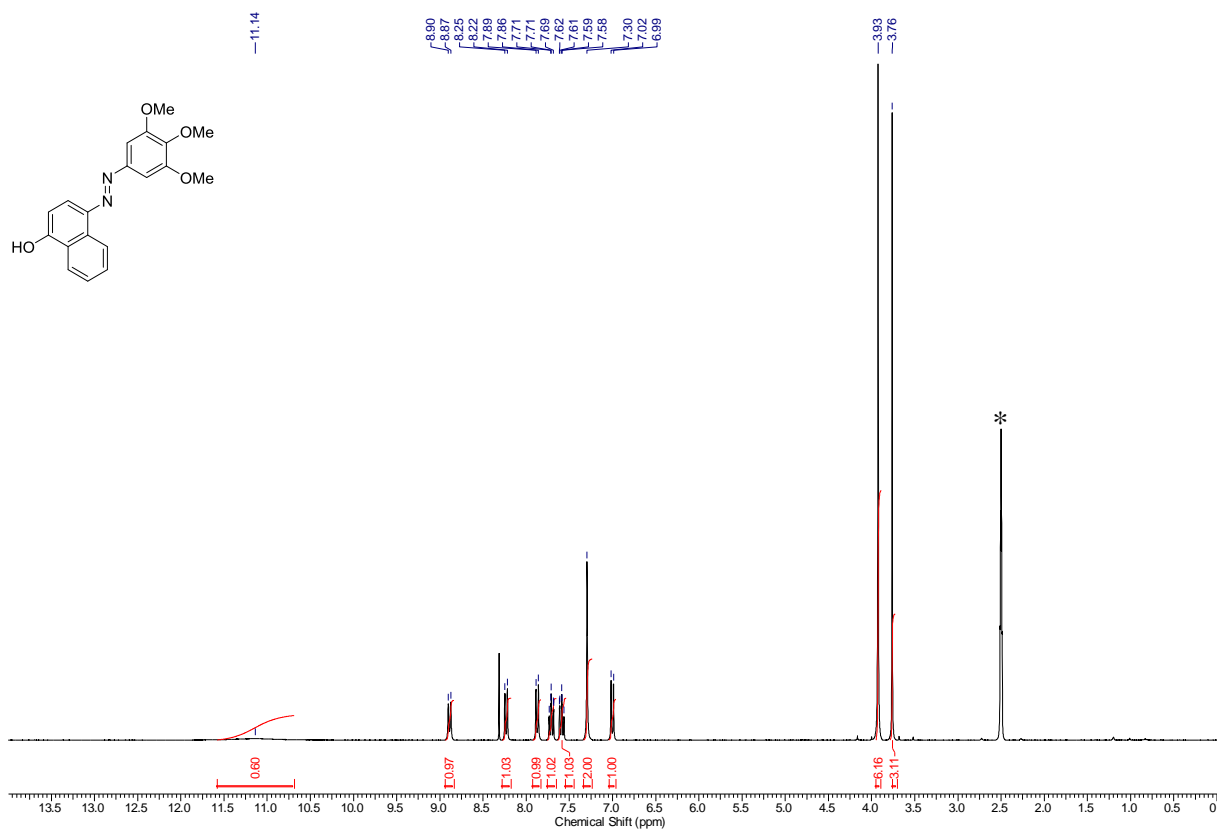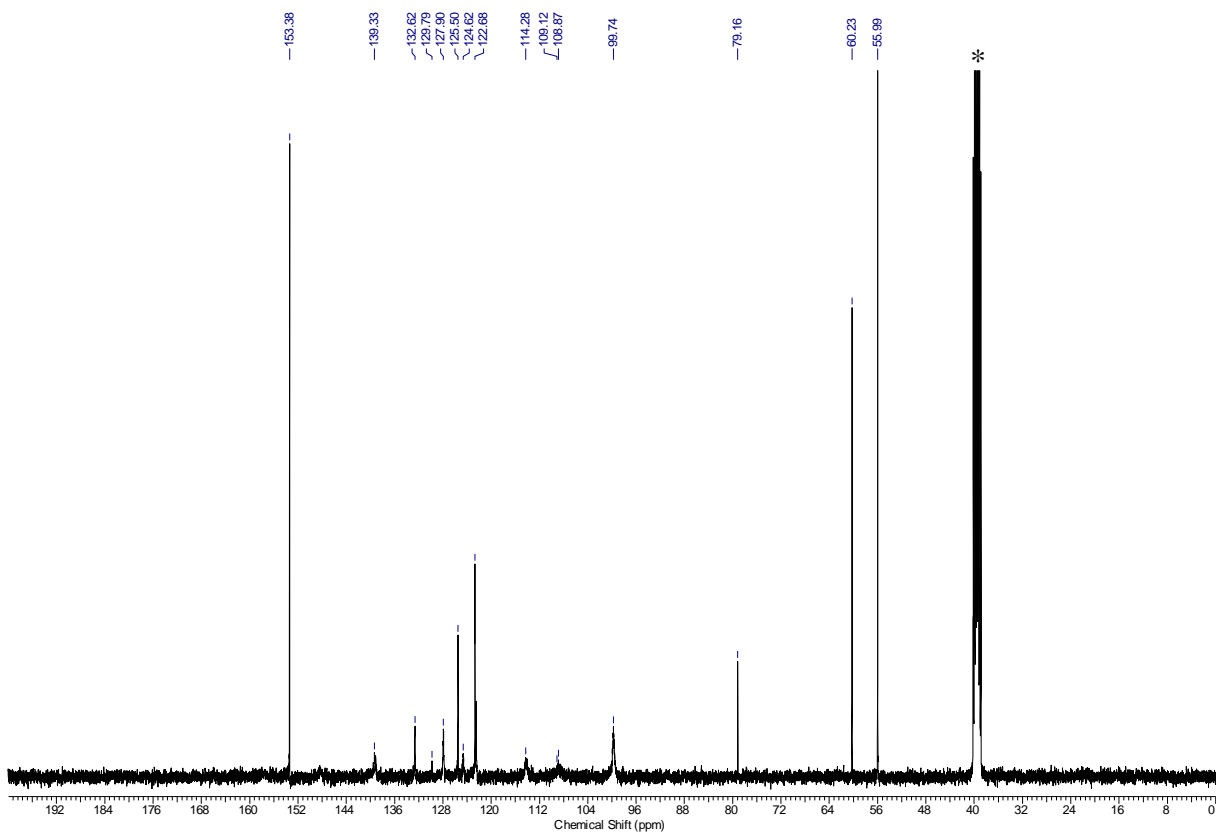

<sup>1</sup>H-NMR (300 MHz, DMSO-*d*<sub>6</sub>) and <sup>13</sup>C-NMR (75 MHz, DMSO-*d*<sub>6</sub>) spectrum of compound 46b. \* = NMR-solvent

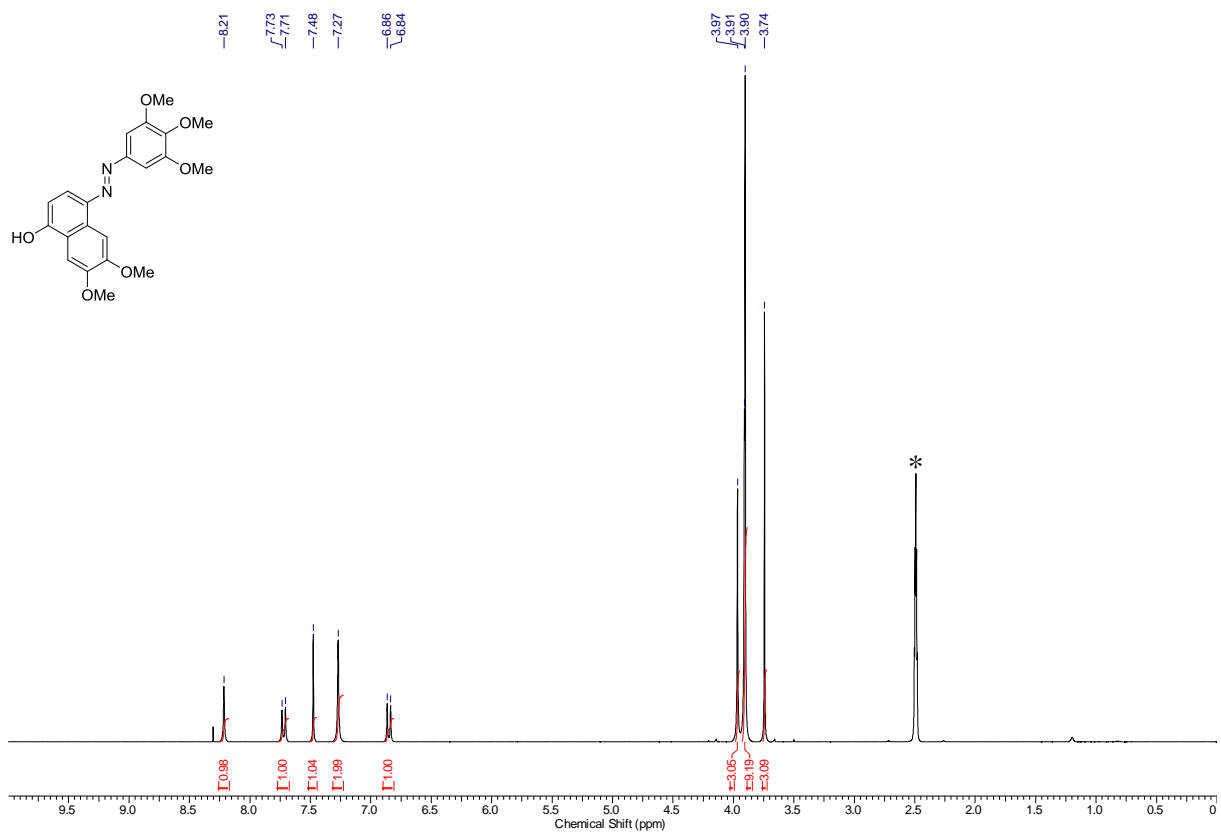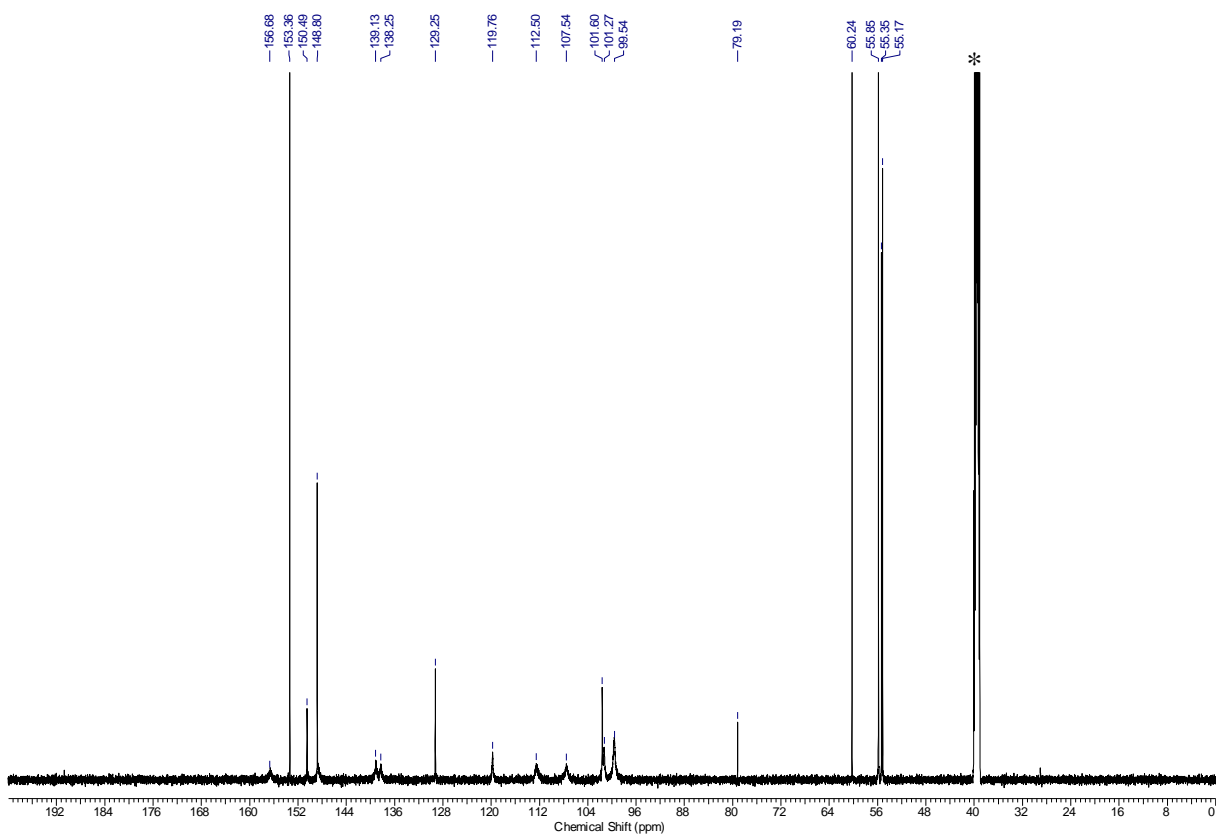

<sup>1</sup>H-NMR (600 MHz, DMSO-*d*<sub>6</sub>) and <sup>13</sup>C-NMR (151 MHz, DMSO-*d*<sub>6</sub>) spectrum of compound **46d**. \* = NMR-

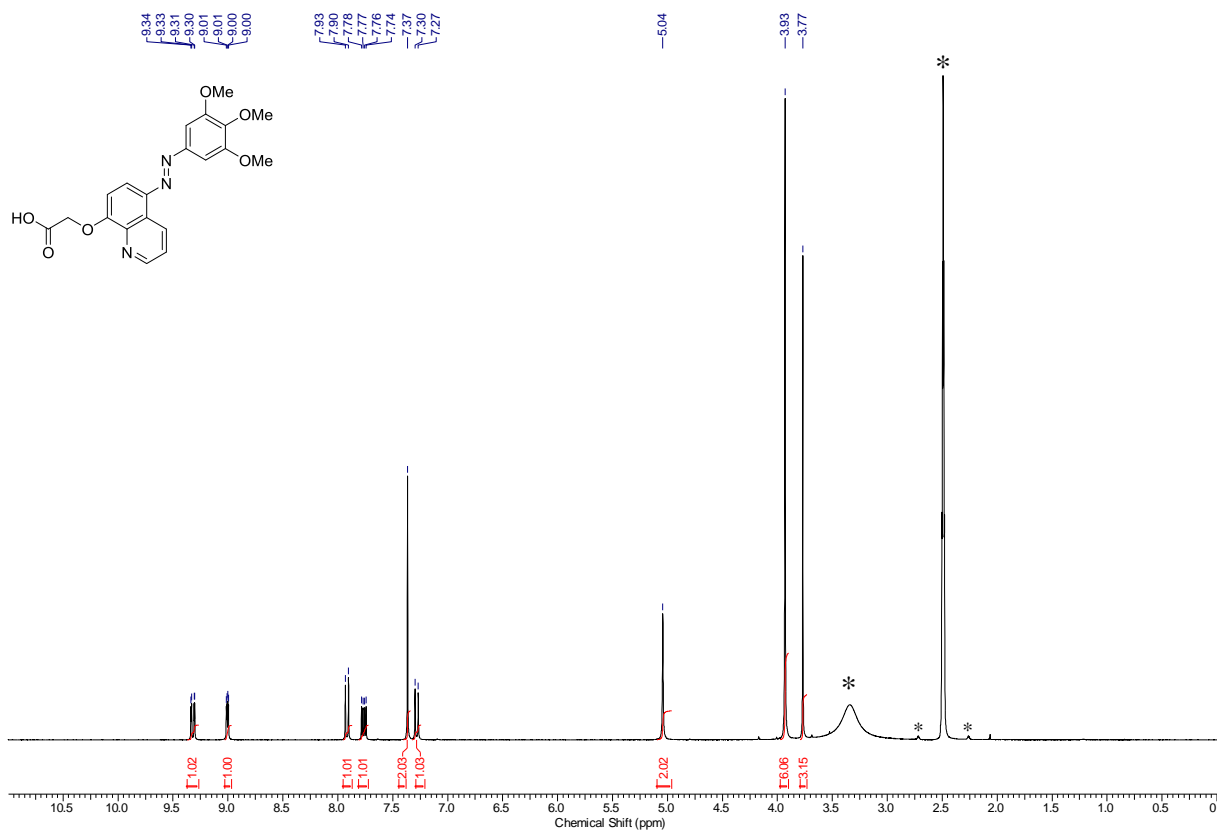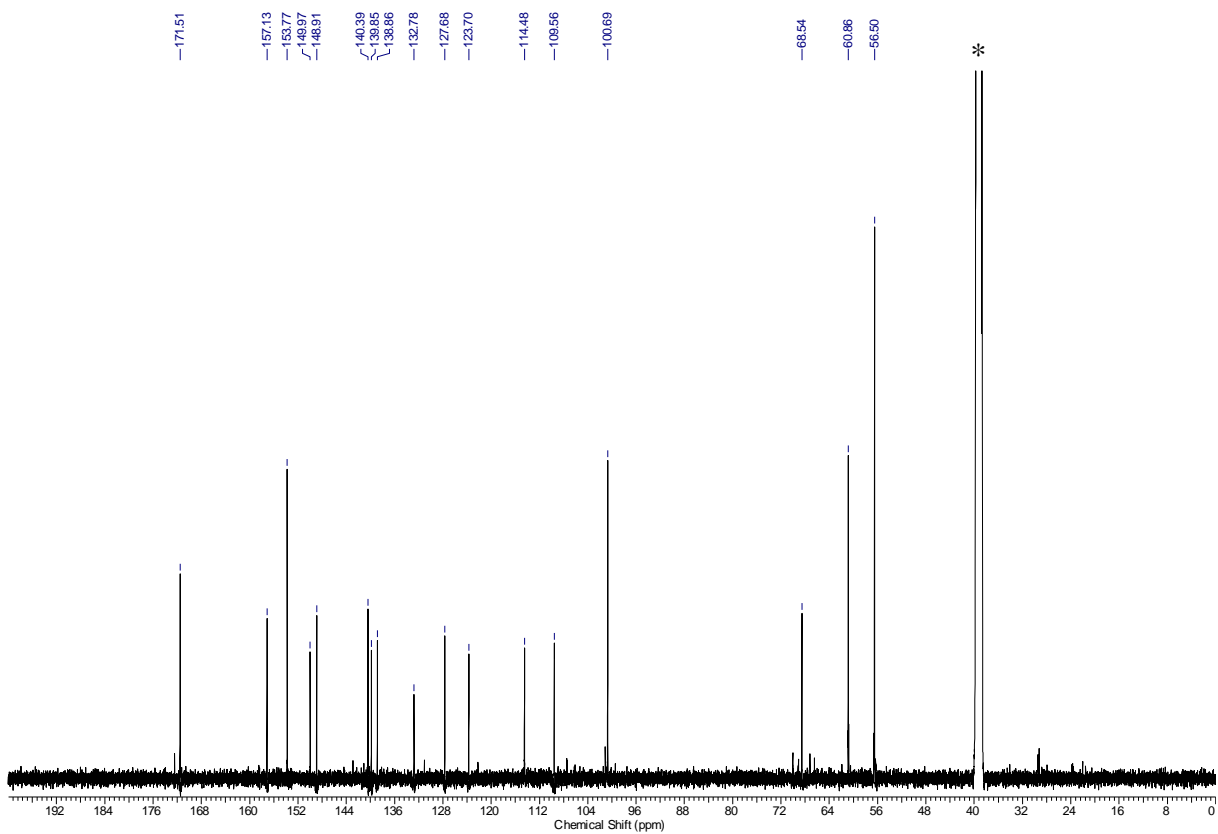

<sup>1</sup>H-NMR (300 MHz, DMSO-*d*<sub>6</sub>) and <sup>13</sup>C-NMR (126 MHz, DMSO-*d*<sub>6</sub>) spectrum of compound **47a**. \* = NMR-solvent, H<sub>2</sub>O

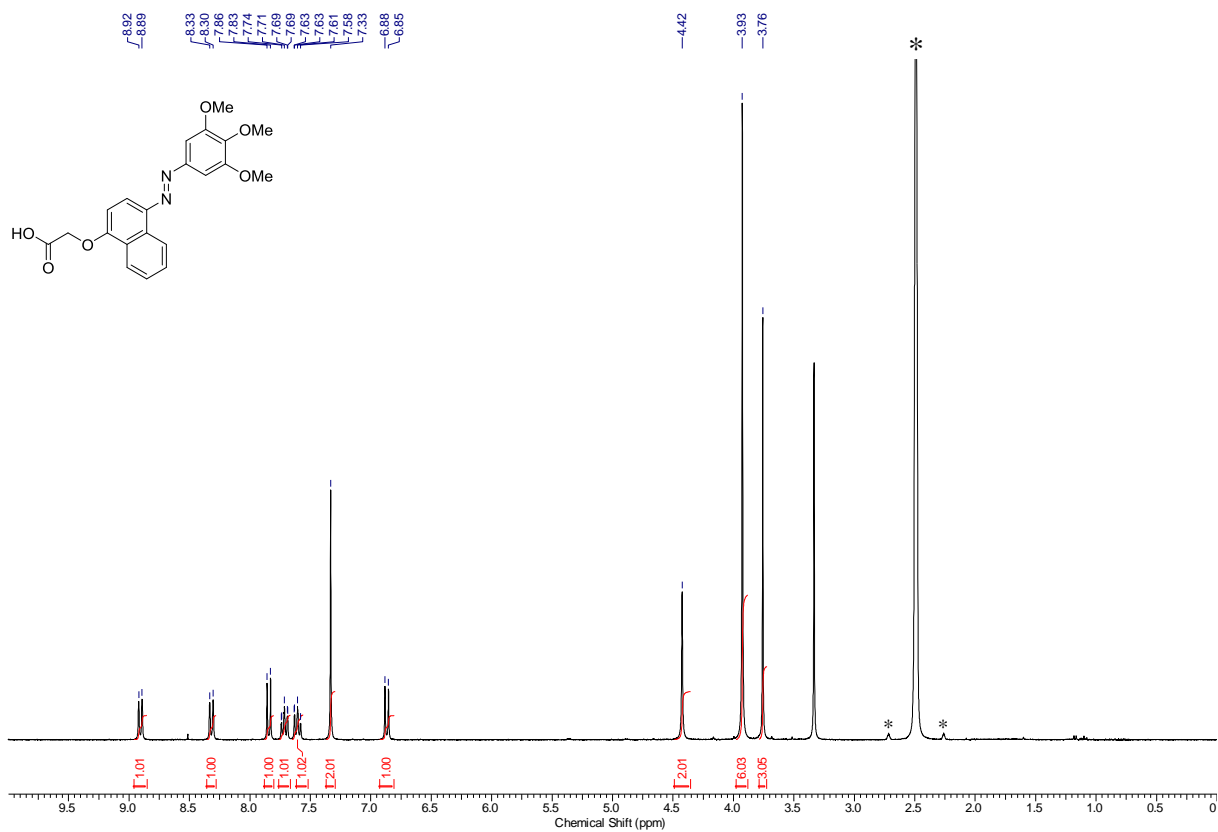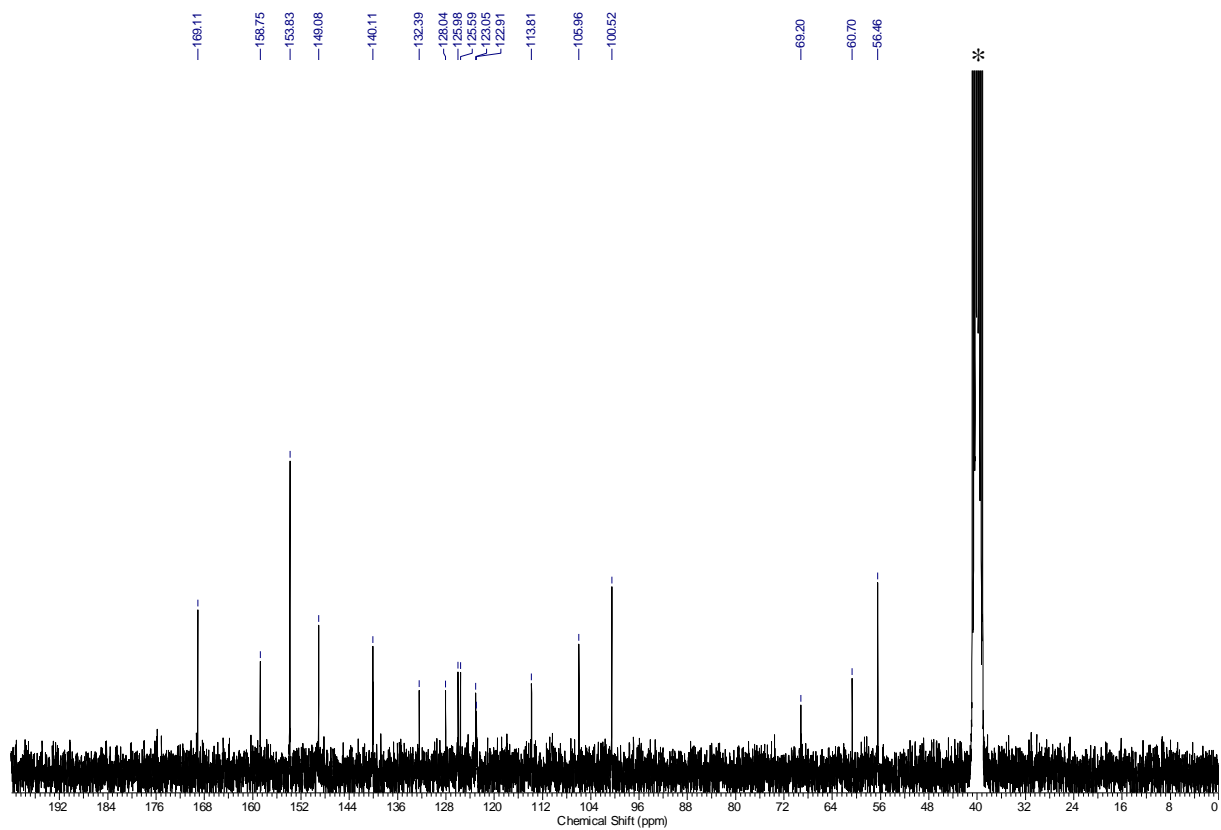

<sup>1</sup>H-NMR (300 MHz, DMSO-*d*<sub>6</sub>) and <sup>13</sup>C-NMR (75 MHz, DMSO-*d*<sub>6</sub>) spectrum of compound **47b**. \* = NMR-solvent

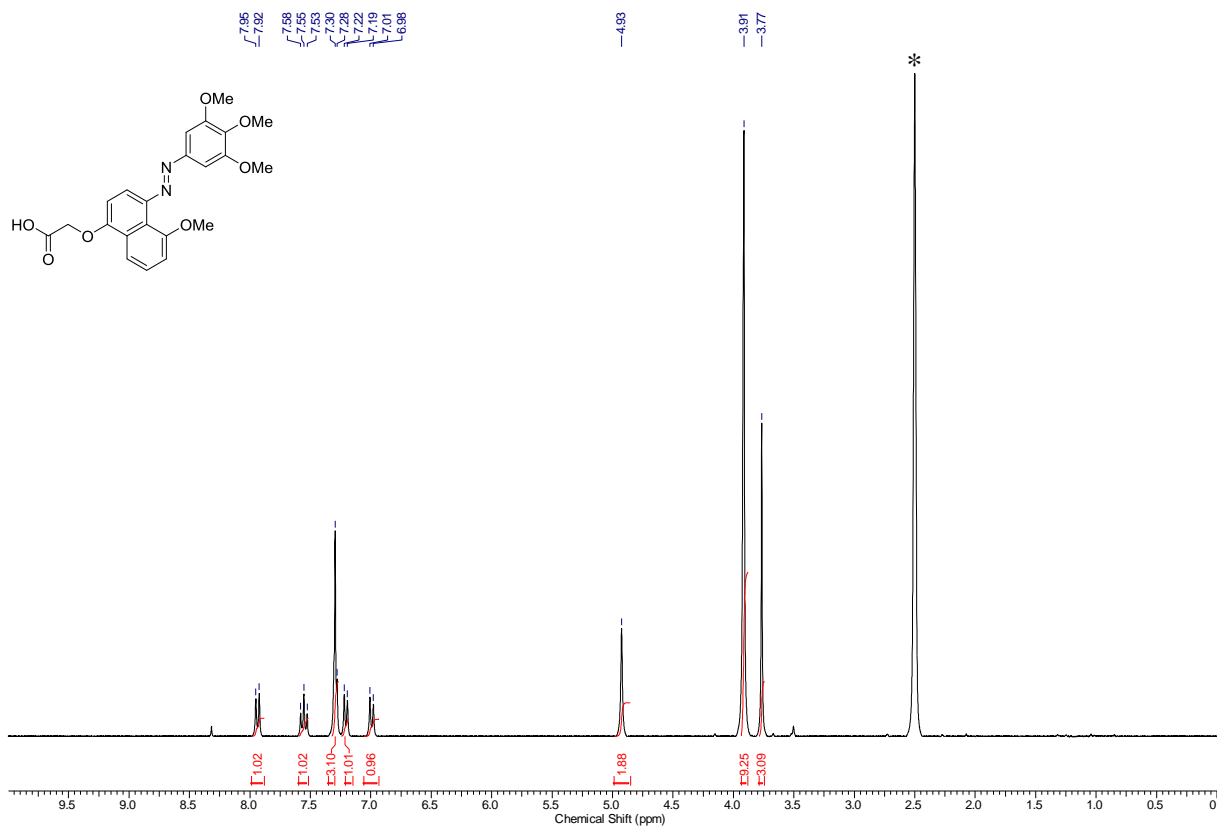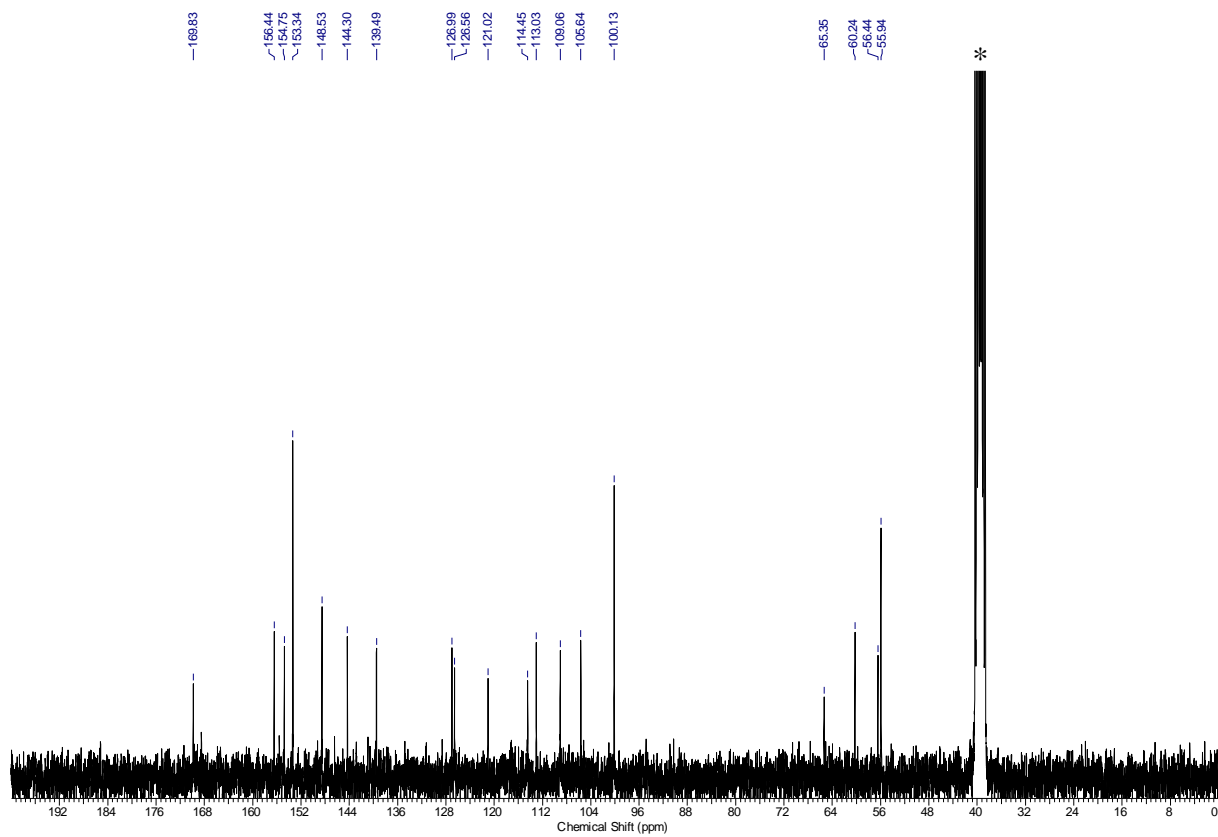

<sup>1</sup>H-NMR (300 MHz, DMSO-*d*<sub>6</sub>) and <sup>13</sup>C-NMR (75 MHz, DMSO-*d*<sub>6</sub>) spectrum of compound 47c. \* = NMR-solvent

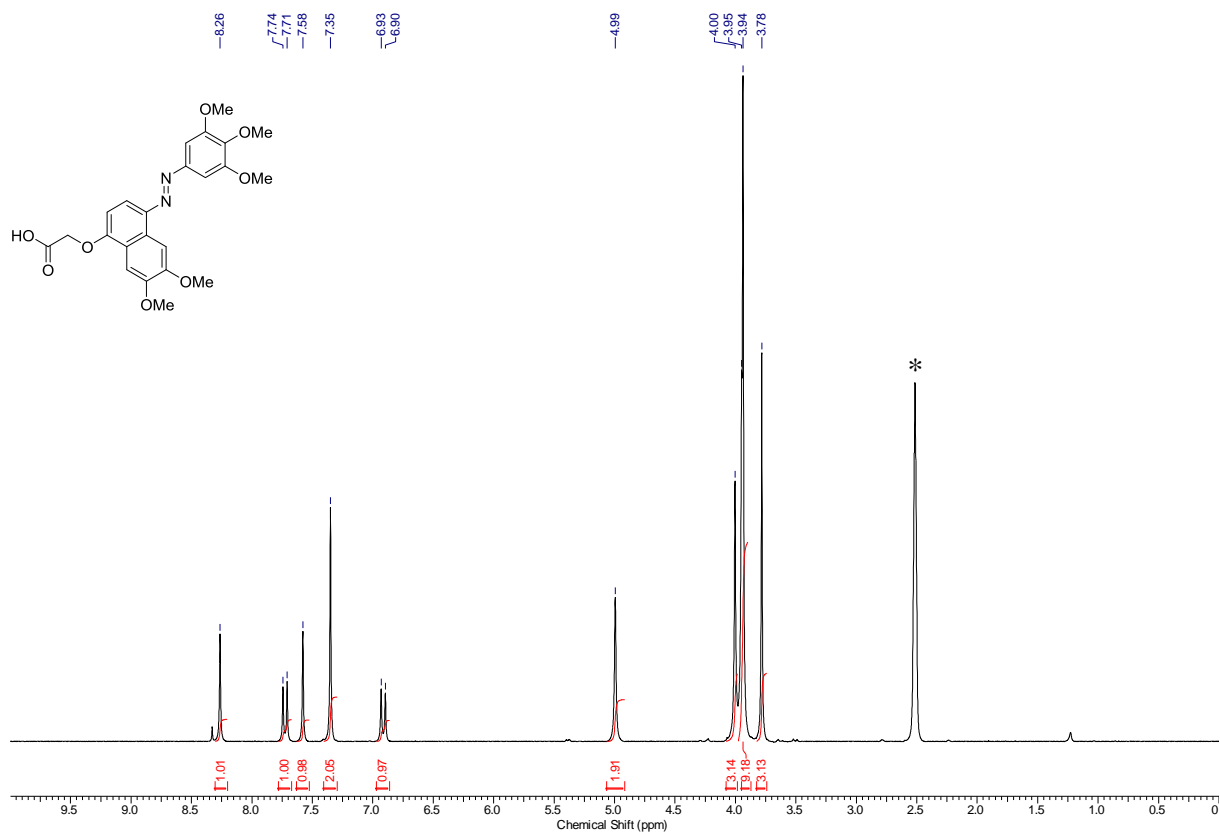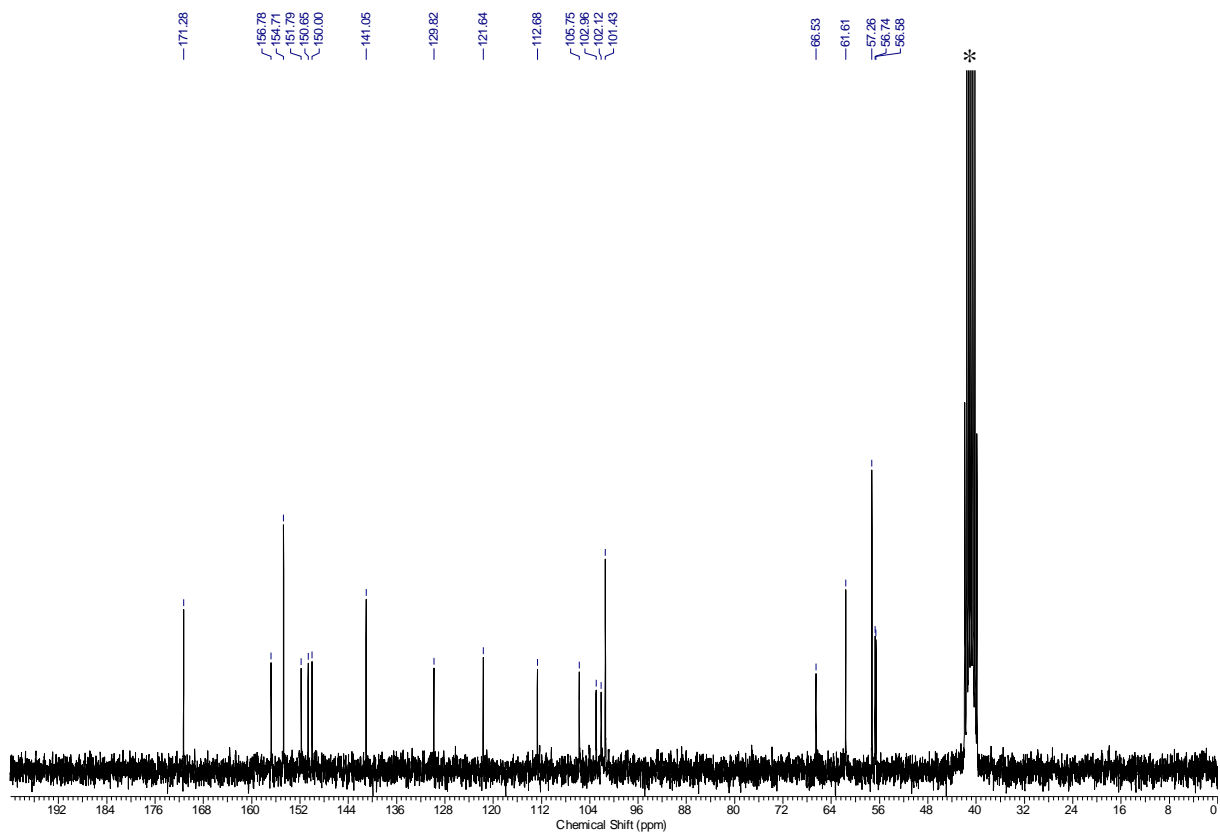

<sup>1</sup>H-NMR (250 MHz, DMSO-*d*<sub>6</sub>) and <sup>13</sup>C-NMR (63 MHz, DMSO-*d*<sub>6</sub>) spectrum of compound 47d. \* = NMR-solvent

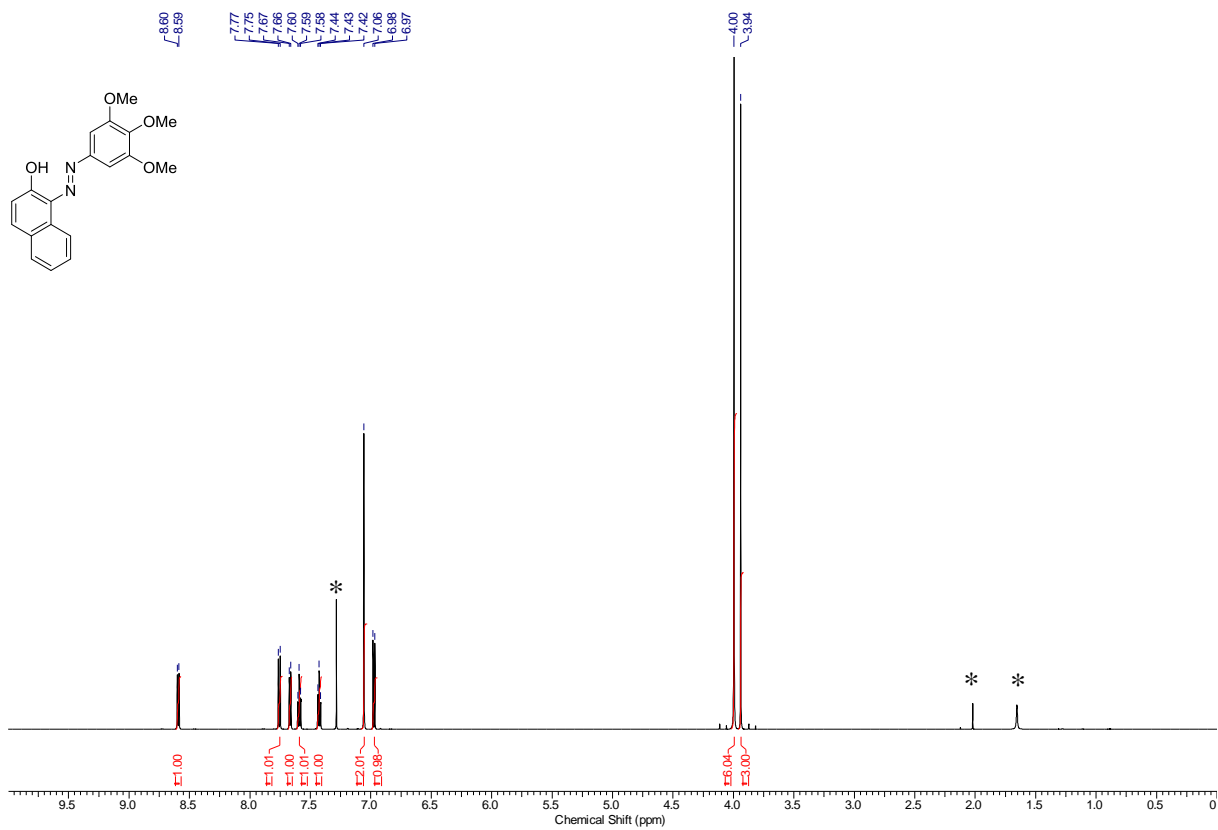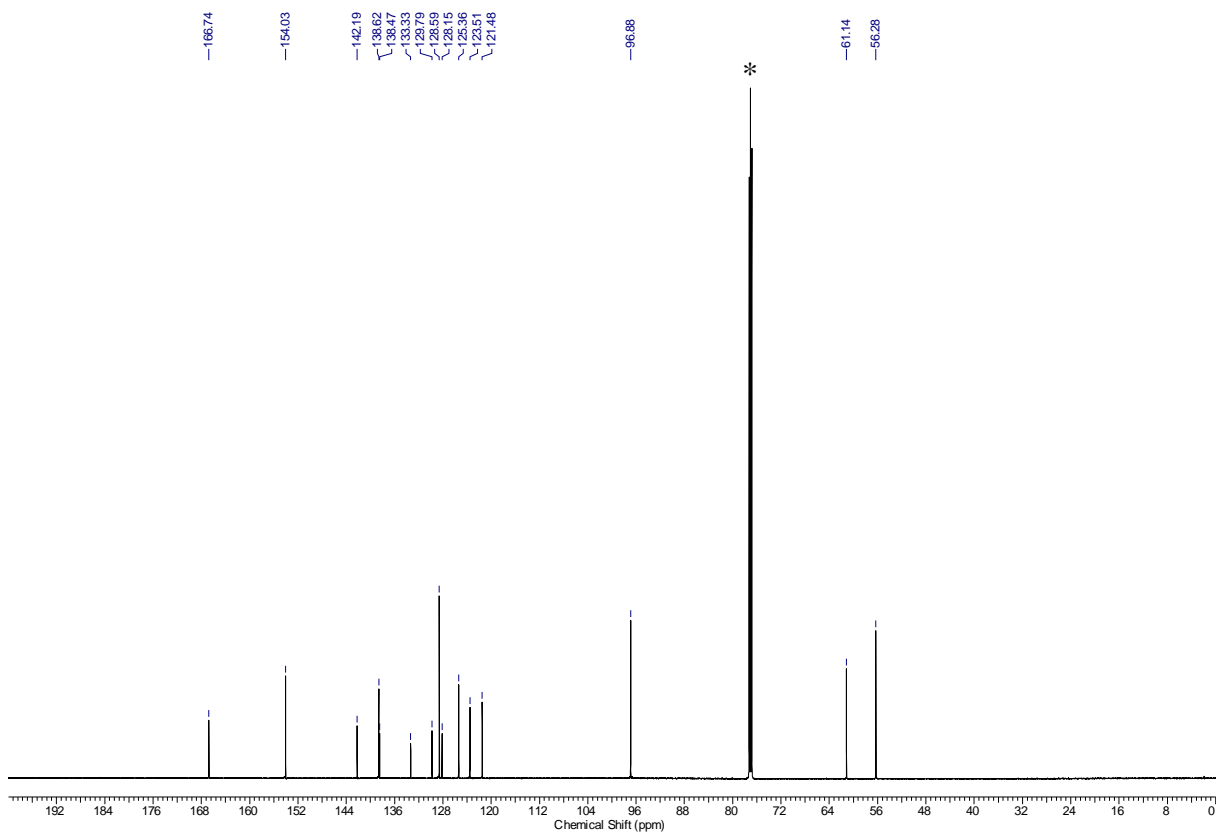

<sup>1</sup>H-NMR (600 MHz, CDCl<sub>3</sub>) and <sup>13</sup>C-NMR (151 MHz, CDCl<sub>3</sub>) spectrum of compound **49**. \* = NMR-solvent, CH<sub>3</sub>CN, H<sub>2</sub>O

## Supplemental References

- 1 P. G. Wuts and T. W. Greene, *Greene's protective groups in organic synthesis*, John Wiley & Sons, 2006.
- 2 B. W. Stein, S. K. Cary, J. M. Berg, E. R. Birnbaum, S. A. Kozimor, V. Mocko and B. L. Scott, *J. Organomet. Chem.*, 2018, **857**, 170.
- 3 P.-A. Deyris, T. Cañeque, F. Gomes, V. Narbonne, G. Maestri and M. Malacria, *Heterocycles*, 2014, **88**, 807.
- 4 S. G. Ramkumar and S. Ramakrishnan, *Macromolecules*, 2010, **43**, 2307-2312.
- 5 D. M. Mofford, G. R. Reddy and S. C. Miller, *J. Am. Chem. Soc.*, 2014, **136**, 13277.
- 6 E. M. Doherty, C. Fotsch, Y. Bo, P. P. Chakrabarti, N. Chen, N. Gavva, N. Han, M. G. Kelly, J. Kincaid, L. Klionsky, Q. Liu, V. I. Ognyanov, R. Tamir, X. Wang, J. Zhu, M. H. Norman and J. J. S. Treanor, *J. Med. Chem.*, 2005, **48**, 71.
- 7 W. L. Armarego, *Purification of laboratory chemicals*, Butterworth-Heinemann, 2017.
- 8 E. Fischer, *J. Phys. Chem.*, 1967, **71**, 3704.
